# Supplementary material for: DFT/NMR Approach for the Configuration Assignment of Groups of Stereoisomers by the Combination and Comparison of Experimental and Predicted Sets of Data
Source: PubMed Central journal article supplement (PMC7997581; doi:10.1021/acs.joc.9b03129), 2020-01-21
Supplement: jo9b03129_si_001.pdf [file jo9b03129_si_001.pdf]

# Supporting Information

## DFT/NMR Approach for the Configuration Assignment of Groups of Stereoisomers by the Combination and Comparison of Experimental and Predicted Sets of Data

Gianluigi Lauro,<sup>a</sup> Pronay Das,<sup>b,c</sup> Raffaele Riccio,<sup>a</sup> D. Srinivasa Reddy,<sup>b,c</sup> and Giuseppe Bifulco<sup>\*,a</sup>

<sup>a</sup>Department of Pharmacy, University of Salerno, Via Giovanni Paolo II 132, Fisciano 84084, Italy

<sup>b</sup>Organic Chemistry Division, CSIR-National Chemical Laboratory, Dr. Homi Bhabha Road, Pune, 411008, India.

<sup>c</sup>Academy of Scientific and Innovative Research (AcSIR), New Delhi, 110025, India

\*To whom correspondence should be addressed: bifulco@unisa.it, Telephone: +39 (0)89969741,

Fax: +39 (0)89969602

## Table of contents

|                                                                                                                                                                                                                                                                              |                                      |
|------------------------------------------------------------------------------------------------------------------------------------------------------------------------------------------------------------------------------------------------------------------------------|--------------------------------------|
| <b>Table S1.</b> <sup>13</sup> C experimental related to exp_1a set of data and calculated NMR chemical shifts (MPW1PW91/6-31g(d,p) level of theory) related to calc_1a, calc_1b, calc_1c, calc_1d sets of data, with $ \Delta\delta (^{13}\text{C})$ and MAE values .....   | S6                                   |
| <b>Table S2.</b> <sup>13</sup> C experimental related to exp_1b set of data and calculated NMR chemical shifts (MPW1PW91/6-31g(d,p) level of theory) related to calc_1a, calc_1b, calc_1c, calc_1d sets of data, with $ \Delta\delta (^{13}\text{C})$ and MAE values.....    | <b>SError! Bookmark not defined.</b> |
| <b>Table S3.</b> <sup>13</sup> C experimental related to exp_1c set of data and calculated NMR chemical shifts (MPW1PW91/6-31g(d,p) level of theory) related to calc_1a, calc_1b, calc_1c, calc_1d sets of data, with $ \Delta\delta (^{13}\text{C})$ and MAE values.....    | S8                                   |
| <b>Table S4.</b> <sup>13</sup> C experimental related to exp_1d set of data and calculated NMR chemical shifts (MPW1PW91/6-31g(d,p) level of theory) related to calc_1a, calc_1b, calc_1c, calc_1d sets of data, with $ \Delta\delta (^{13}\text{C})$ and MAE values.....    | S9                                   |
| <b>Table S5.</b> <sup>13</sup> C experimental related to exp_1a set of data and calculated NMR chemical shifts (MPW1PW91/6-311+g(d,p) level of theory) related to calc_1a, calc_1b, calc_1c, calc_1d sets of data, with $ \Delta\delta (^{13}\text{C})$ and MAE values ..... | S10                                  |
| <b>Table S6.</b> <sup>13</sup> C experimental related to exp_1b set of data and calculated NMR chemical shifts (MPW1PW91/6-311+g(d,p) level of theory) related to calc_1a, calc_1b, calc_1c, calc_1d sets of data, with $ \Delta\delta (^{13}\text{C})$ and MAE values.....  | S11                                  |
| <b>Table S7.</b> <sup>13</sup> C experimental related to exp_1c set of data and calculated NMR chemical shifts (MPW1PW91/6-311+g(d,p) level of theory) related to calc_1a, calc_1b, calc_1c, calc_1d sets of data, with $ \Delta\delta (^{13}\text{C})$ and MAE values ..... | S12                                  |
| <b>Table S8.</b> <sup>13</sup> C experimental related to exp_1d set of data and calculated NMR chemical shifts (MPW1PW91/6-311+g(d,p) level of theory) related to calc_1a, calc_1b, calc_1c, calc_1d sets of data, with $ \Delta\delta (^{13}\text{C})$ and MAE values ..... | S13                                  |
| <b>Table S9.</b> <sup>13</sup> C experimental related to exp_1a set of data and calculated NMR chemical shifts (B97-2/cc-pVTZ level of theory) related to calc_1a, calc_1b, calc_1c, calc_1d sets of data, with $ \Delta\delta (^{13}\text{C})$ and MAE values .....         | S14                                  |
| <b>Table S10.</b> <sup>13</sup> C experimental related to exp_1b set of data and calculated NMR chemical shifts (B97-2/cc-pVTZ level of theory) related to calc_1a, calc_1b, calc_1c, calc_1d sets of data, with $ \Delta\delta (^{13}\text{C})$ and MAE values.....         | S15                                  |

|                                                                                                                                                                                                                                                                                                                                                    |     |
|----------------------------------------------------------------------------------------------------------------------------------------------------------------------------------------------------------------------------------------------------------------------------------------------------------------------------------------------------|-----|
| <b>Table S11.</b> $^{13}\text{C}$ experimental related to exp_1c set of data and calculated NMR chemical shifts (B97-2/cc-pVTZ level of theory) related to calc_1a, calc_1b, calc_1c, calc_1d sets of data, with $ \Delta\delta (^{13}\text{C})$ and MAE values.....                                                                               | S16 |
| <b>Table S12.</b> $^{13}\text{C}$ experimental related to exp_1d set of data and calculated NMR chemical shifts (B97-2/cc-pVTZ level of theory) related to calc_1a, calc_1b, calc_1c, calc_1d sets of data, with $ \Delta\delta (^{13}\text{C})$ and MAE values.....                                                                               | S17 |
| <b>Table S13.</b> Comparison of the results obtained by computing the $\text{MAE}_{\Delta\delta}$ values (bottom) and the AVER_MAE values (top), the latter defined as the average of the four possible MAE values obtained from the comparison of the calculated and experimental chemical shifts, for each of the 24 comparison alignments. .... | S18 |
| <b>Table S14.</b> $^{13}\text{C}$ experimental related to exp_2a set of data and calculated NMR chemical shifts (MPW1PW91/6-31g(d,p) level of theory) related to calc_2a, calc_2b, calc_2c, calc_2d sets of data, with $ \Delta\delta (^{13}\text{C})$ and MAE values .....                                                                        | S20 |
| <b>Table S15.</b> $^{13}\text{C}$ experimental related to exp_2b set of data and calculated NMR chemical shifts (MPW1PW91/6-31g(d,p) level of theory) related to calc_2a, calc_2b, calc_2c, calc_2d sets of data, with $ \Delta\delta (^{13}\text{C})$ and MAE values.....                                                                         | S21 |
| <b>Table S16.</b> $^{13}\text{C}$ experimental related to exp_2c set of data and calculated NMR chemical shifts (MPW1PW91/6-31g(d,p) level of theory) related to calc_2a, calc_2b, calc_2c, calc_2d sets of data, with $ \Delta\delta (^{13}\text{C})$ and MAE values.....                                                                         | S22 |
| <b>Table S17.</b> $^{13}\text{C}$ experimental related to exp_2d set of data and calculated NMR chemical shifts (MPW1PW91/6-31g(d,p) level of theory) related to calc_2a, calc_2b, calc_2c, calc_2d sets of data, with $ \Delta\delta (^{13}\text{C})$ and MAE values.....                                                                         | S23 |
| <b>Table S18.</b> $^{13}\text{C}$ experimental related to exp_2a set of data and calculated NMR chemical shifts (MPW1PW91/6-311+g(d,p) level of theory) related to calc_2a, calc_2b, calc_2c, calc_2d sets of data, with $ \Delta\delta (^{13}\text{C})$ and MAE values .....                                                                      | S24 |
| <b>Table S19.</b> $^{13}\text{C}$ experimental related to exp_2b set of data and calculated NMR chemical shifts (MPW1PW91/6-311+g(d,p) level of theory) related to calc_2a, calc_2b, calc_2c, calc_2d sets of data, with $ \Delta\delta (^{13}\text{C})$ and MAE values .....                                                                      | S25 |
| <b>Table S20.</b> $^{13}\text{C}$ experimental related to exp_2c set of data and calculated NMR chemical shifts (MPW1PW91/6-311+g(d,p) level of theory) related to calc_2a, calc_2b, calc_2c, calc_2d sets of data, with $ \Delta\delta (^{13}\text{C})$ and MAE values .....                                                                      | S26 |
| <b>Table S21.</b> $^{13}\text{C}$ experimental related to exp_2d set of data and calculated NMR chemical shifts (MPW1PW91/6-311+g(d,p) level of theory) related to calc_2a, calc_2b, calc_2c, calc_2d sets of data, with $ \Delta\delta (^{13}\text{C})$ and MAE values .....                                                                      | S27 |

|                                                                                                                                                                                                                                                                                |     |
|--------------------------------------------------------------------------------------------------------------------------------------------------------------------------------------------------------------------------------------------------------------------------------|-----|
| <b>Table S22.</b> <sup>13</sup> C experimental related to exp_2a set of data and calculated NMR chemical shifts (B97-2/cc-pVTZ level of theory) related to calc_2a, calc_2b, calc_2c, calc_2d sets of data, with $ \Delta\delta (^{13}\text{C})$ and MAE values .....          | S28 |
| <b>Table S23.</b> <sup>13</sup> C experimental related to exp_2b set of data and calculated NMR chemical shifts (B97-2/cc-pVTZ level of theory) related to calc_2a, calc_2b, calc_2c, calc_2d sets of data, with $ \Delta\delta (^{13}\text{C})$ and MAE values.....           | S29 |
| <b>Table S24.</b> <sup>13</sup> C experimental related to exp_2c set of data and calculated NMR chemical shifts (B97-2/cc-pVTZ level of theory) related to calc_2a, calc_2b, calc_2c, calc_2d sets of data, with $ \Delta\delta (^{13}\text{C})$ and MAE values.....           | S30 |
| <b>Table S25.</b> <sup>13</sup> C experimental related to exp_2d set of data and calculated NMR chemical shifts (B97-2/cc-pVTZ level of theory) related to calc_2a, calc_2b, calc_2c, calc_2d sets of data, with $ \Delta\delta (^{13}\text{C})$ and MAE values.....           | S31 |
| <b>Table S26.</b> Sampled and DFT geometry optimized conformers related to calc_1a, with energy values (Hartree) and related % contribution on the final Boltzmann distribution for the three employed functional/basis set combinations .....                                 | S32 |
| <b>Table S27.</b> Cartesian coordinates of the optimized geometries for the conformers related to calc_1a. The related energies and % contribution on the final Boltzmann distribution for the three employed functional/basis set combinations are reported in Table S26..... | S33 |
| <b>Table S28.</b> Sampled and DFT geometry optimized conformers related to calc_1b, with energy values (Hartree) and related % contribution on the final Boltzmann distribution for the three employed functional/basis set combinations .....                                 | S54 |
| <b>Table S29.</b> Cartesian coordinates of the optimized geometries for the conformers related to calc_1b. The related energies and % contribution on the final Boltzmann distribution for the three employed functional/basis set combinations are reported in Table S28..... | S56 |
| <b>Table S30.</b> Sampled and DFT geometry optimized conformers related to calc_1c, with energy values (Hartree) and related % contribution on the final Boltzmann distribution for the three employed functional/basis set combinations .....                                 | S81 |
| <b>Table S31.</b> Cartesian coordinates of the optimized geometries for the conformers related to calc_1c. The related energies and % contribution on the final Boltzmann distribution for the three employed functional/basis set combinations are reported in Table S30..... | S82 |
| <b>Table S32.</b> Sampled and DFT geometry optimized conformers related to calc_1d, with energy values (Hartree) and related % contribution on the final Boltzmann distribution for the three employed functional/basis set combinations .....                                 | S97 |

|                                                                                                                                                                                                                                                                                |      |
|--------------------------------------------------------------------------------------------------------------------------------------------------------------------------------------------------------------------------------------------------------------------------------|------|
| <b>Table S33.</b> Cartesian coordinates of the optimized geometries for the conformers related to calc_1d. The related energies and % contribution on the final Boltzmann distribution for the three employed functional/basis set combinations are reported in Table S32..... | S98  |
| <b>Table S34.</b> Sampled and DFT geometry optimized conformers related to calc_2a, with energy values (Hartree) and related % contribution on the final Boltzmann distribution for the three employed functional/basis set combinations .....                                 | S115 |
| <b>Table S35.</b> Cartesian coordinates of the optimized geometries for the conformers related to calc_2a. The related energies and % contribution on the final Boltzmann distribution for the three employed functional/basis set combinations are reported in Table S34..... | S116 |
| <b>Table S36.</b> Sampled and DFT geometry optimized conformers related to calc_2b, with energy values (Hartree) and related % contribution on the final Boltzmann distribution for the three employed functional/basis set combinations .....                                 | S127 |
| <b>Table S37.</b> Cartesian coordinates of the optimized geometries for the conformers related to calc_2b. The related energies and % contribution on the final Boltzmann distribution for the three employed functional/basis set combinations are reported in Table S36..... | S128 |
| <b>Table S38.</b> Sampled and DFT geometry optimized conformers related to calc_2c, with energy values (Hartree) and related % contribution on the final Boltzmann distribution for the three employed functional/basis set combinations .....                                 | S145 |
| <b>Table S39.</b> Cartesian coordinates of the optimized geometries for the conformers related to calc_2c. The related energies and % contribution on the final Boltzmann distribution for the three employed functional/basis set combinations are reported in Table S38..... | S147 |
| <b>Table S40.</b> Sampled and DFT geometry optimized conformers related to calc_2d, with energy values (Hartree) and related % contribution on the final Boltzmann distribution for the three employed functional/basis set combinations .....                                 | S184 |
| <b>Table S41.</b> Cartesian coordinates of the optimized geometries for the conformers related to calc_2d. The related energies and % contribution on the final Boltzmann distribution for the three employed functional/basis set combinations are reported in Table S40..... | S186 |

**Table S1.**  $^{13}\text{C}$  experimental related to exp\_1a set of data and calculated NMR chemical shifts (MPW1PW91/6-31g(d,p) level of theory) related to calc\_1a, calc\_1b, calc\_1c, calc\_1d sets of data, with  $^a|\Delta\delta|(^{13}\text{C})$  and  $^b\text{MAE}$  values. Chemical shift data here reported were produced using benzene as reference compound for  $\text{sp}^2$  carbons (highlighted in yellow), and tetramethylsilane (TMS) for  $\text{sp}^3$  carbons.

| Position         | $\delta_{\text{exp}}(^{13}\text{C}), \text{ppm}$ |         | $\delta_{\text{calc}}(^{13}\text{C}), \text{ppm}$ |         |         | $ \Delta\delta (^{13}\text{C}), \text{ppm}^a$ |         |         |         |
|------------------|--------------------------------------------------|---------|---------------------------------------------------|---------|---------|-----------------------------------------------|---------|---------|---------|
|                  | exp_1a                                           | calc_1a | calc_1b                                           | calc_1c | calc_1d | calc_1a                                       | calc_1b | calc_1c | calc_1d |
| 1                | 169.9                                            | 163.65  | 163.79                                            | 163.82  | 163.62  | 6.25                                          | 6.11    | 6.08    | 6.29    |
| 3                | 76.3                                             | 72.81   | 73.56                                             | 73.37   | 72.48   | 3.49                                          | 2.74    | 2.93    | 3.82    |
| 4                | 33.6                                             | 34.93   | 33.52                                             | 33.73   | 35.02   | 1.33                                          | 0.08    | 0.13    | 1.42    |
| 4a               | 141.8                                            | 143.10  | 143.24                                            | 143.31  | 143.05  | 1.30                                          | 1.44    | 1.51    | 1.25    |
| 5                | 106.7                                            | 105.75  | 105.80                                            | 105.76  | 105.75  | 0.95                                          | 0.90    | 0.94    | 0.95    |
| 6                | 163.1                                            | 160.89  | 160.91                                            | 160.89  | 160.92  | 2.21                                          | 2.19    | 2.21    | 2.18    |
| 7                | 102.0                                            | 101.15  | 101.10                                            | 101.10  | 101.15  | 0.85                                          | 0.90    | 0.90    | 0.85    |
| 8                | 164.3                                            | 165.73  | 165.74                                            | 165.75  | 165.76  | 1.43                                          | 1.44    | 1.45    | 1.46    |
| 8a               | 101.5                                            | 104.34  | 104.27                                            | 104.25  | 104.32  | 2.84                                          | 2.77    | 2.75    | 2.82    |
| 9                | 39.3                                             | 40.76   | 38.21                                             | 40.74   | 42.54   | 1.46                                          | 1.09    | 1.44    | 3.24    |
| 10               | 66.6                                             | 64.23   | 65.24                                             | 71.87   | 71.21   | 2.37                                          | 1.36    | 5.27    | 4.61    |
| 11               | 30.9                                             | 31.53   | 30.46                                             | 30.94   | 31.66   | 0.63                                          | 0.44    | 0.04    | 0.76    |
| 12               | 18.1                                             | 20.24   | 20.19                                             | 24.80   | 24.74   | 2.14                                          | 2.09    | 6.70    | 6.64    |
| 13               | 30.9                                             | 30.21   | 30.54                                             | 32.33   | 32.55   | 0.69                                          | 0.36    | 1.43    | 1.65    |
| 14               | 68.0                                             | 66.65   | 66.18                                             | 71.98   | 71.73   | 1.35                                          | 1.82    | 3.98    | 3.73    |
| 15               | 18.9                                             | 18.45   | 19.27                                             | 22.82   | 22.76   | 0.45                                          | 0.37    | 3.92    | 3.86    |
| MAE <sup>b</sup> |                                                  |         |                                                   |         |         | 1.86                                          | 1.63    | 2.61    | 2.85    |

<sup>a</sup>  $|\Delta\delta|(^{13}\text{C}) = |\delta_{\text{exp}} - \delta_{\text{calc}}|(^{13}\text{C}), \text{ppm}$ : absolute differences for experimental versus calculated  $^{13}\text{C}$  NMR chemical shifts

<sup>b</sup>  $\text{MAE} = \sum[|(\delta_{\text{exp}} - \delta_{\text{calcd}})|]/n$ , summation through n of the absolute error values (difference of the absolute values between corresponding experimental and  $^{13}\text{C}$  chemical shifts), normalized to the number of the chemical shifts

**Table S2.**  $^{13}\text{C}$  experimental related to exp\_1b set of data and calculated NMR chemical shifts (MPW1PW91/6-31g(d,p) level of theory) related to calc\_1a, calc\_1b, calc\_1c, calc\_1d sets of data, with  $^a|\Delta\delta|(^{13}\text{C})$  and  $^b\text{MAE}$  values. Chemical shift data here reported were produced using benzene as reference compound for  $\text{sp}^2$  carbons (highlighted in yellow), and tetramethylsilane (TMS) for  $\text{sp}^3$  carbons.

| Position         | $\delta_{\text{exp}}(^{13}\text{C}), \text{ppm}$ |         | $\delta_{\text{calc}}(^{13}\text{C}), \text{ppm}$ |         |         |         | $ \Delta\delta (^{13}\text{C}), \text{ppm}^a$ |         |         |  |
|------------------|--------------------------------------------------|---------|---------------------------------------------------|---------|---------|---------|-----------------------------------------------|---------|---------|--|
|                  | exp_1b                                           | calc_1a | calc_1b                                           | calc_1c | calc_1d | calc_1a | calc_1b                                       | calc_1c | calc_1d |  |
| 1                | 170.0                                            | 163.65  | 163.79                                            | 163.82  | 163.62  | 6.35    | 6.21                                          | 6.18    | 6.38    |  |
| 3                | 76.6                                             | 72.81   | 73.56                                             | 73.37   | 72.48   | 3.79    | 3.04                                          | 3.23    | 4.12    |  |
| 4                | 32.6                                             | 34.93   | 33.52                                             | 33.73   | 35.02   | 2.33    | 0.92                                          | 1.13    | 2.42    |  |
| 4a               | 141.6                                            | 143.10  | 143.24                                            | 143.31  | 143.05  | 1.50    | 1.64                                          | 1.71    | 1.45    |  |
| 5                | 106.7                                            | 105.75  | 105.80                                            | 105.76  | 105.75  | 0.95    | 0.90                                          | 0.94    | 0.95    |  |
| 6                | 163.0                                            | 160.89  | 160.91                                            | 160.89  | 160.92  | 2.11    | 2.09                                          | 2.11    | 2.08    |  |
| 7                | 102.0                                            | 101.15  | 101.10                                            | 101.10  | 101.15  | 0.85    | 0.90                                          | 0.90    | 0.85    |  |
| 8                | 164.4                                            | 165.73  | 165.74                                            | 165.75  | 165.76  | 1.33    | 1.34                                          | 1.35    | 1.36    |  |
| 8a               | 101.6                                            | 104.34  | 104.27                                            | 104.25  | 104.32  | 2.74    | 2.67                                          | 2.65    | 2.72    |  |
| 9                | 37.3                                             | 40.76   | 38.21                                             | 40.74   | 42.54   | 3.46    | 0.91                                          | 3.44    | 5.24    |  |
| 10               | 67.2                                             | 64.23   | 65.24                                             | 71.87   | 71.21   | 2.97    | 1.96                                          | 4.67    | 4.01    |  |
| 11               | 29.8                                             | 31.53   | 30.46                                             | 30.94   | 31.66   | 1.73    | 0.66                                          | 1.14    | 1.86    |  |
| 12               | 18.1                                             | 20.24   | 20.19                                             | 24.80   | 24.74   | 2.14    | 2.09                                          | 6.70    | 6.64    |  |
| 13               | 31.5                                             | 30.21   | 30.54                                             | 32.33   | 32.55   | 1.29    | 0.96                                          | 0.83    | 1.05    |  |
| 14               | 67.4                                             | 66.65   | 66.18                                             | 71.98   | 71.73   | 0.75    | 1.22                                          | 4.58    | 4.33    |  |
| 15               | 19.7                                             | 18.45   | 19.27                                             | 22.82   | 22.76   | 1.25    | 0.43                                          | 3.12    | 3.06    |  |
| MAE <sup>b</sup> |                                                  |         |                                                   |         |         | 2.22    | 1.75                                          | 2.79    | 3.03    |  |

<sup>a</sup>  $|\Delta\delta|(^{13}\text{C}) = |\delta_{\text{exp}} - \delta_{\text{calc}}|(^{13}\text{C}), \text{ppm}$ : absolute differences for experimental versus calculated  $^{13}\text{C}$  NMR chemical shifts

<sup>b</sup>  $\text{MAE} = \sum[|\delta_{\text{exp}} - \delta_{\text{calcd}}|]/n$ , summation through n of the absolute error values (difference of the absolute values between corresponding experimental and  $^{13}\text{C}$  chemical shifts), normalized to the number of the chemical shifts

**Table S3.** <sup>13</sup>C experimental related to exp\_1c set of data and calculated NMR chemical shifts (MPW1PW91/6-31g(d,p) level of theory) related to calc\_1a, calc\_1b, calc\_1c, calc\_1d sets of data, with <sup>a</sup>|\Delta\delta|(<sup>13</sup>C) and <sup>b</sup>MAE values. Chemical shift data here reported were produced using benzene as reference compound for sp<sup>2</sup> carbons (highlighted in yellow), and tetramethylsilane (TMS) for sp<sup>3</sup> carbons.

| Position         | $\delta_{\text{exp}}(^{13}\text{C}), \text{ppm}$ |         | $\delta_{\text{calc}}(^{13}\text{C}), \text{ppm}$ |         |         |         | $ \Delta\delta  (^{13}\text{C}), \text{ppm}^{\text{a}}$ |         |         |  |
|------------------|--------------------------------------------------|---------|---------------------------------------------------|---------|---------|---------|---------------------------------------------------------|---------|---------|--|
|                  | exp_1c                                           | calc_1a | calc_1b                                           | calc_1c | calc_1d | calc_1a | calc_1b                                                 | calc_1c | calc_1d |  |
| 1                | 171.7                                            | 163.65  | 163.79                                            | 163.82  | 163.62  | 8.05    | 7.91                                                    | 7.88    | 8.08    |  |
| 3                | 78.0                                             | 72.81   | 73.56                                             | 73.37   | 72.48   | 5.19    | 4.44                                                    | 4.63    | 5.52    |  |
| 4                | 34.5                                             | 34.93   | 33.52                                             | 33.73   | 35.02   | 0.43    | 0.98                                                    | 0.77    | 0.52    |  |
| 4a               | 143.6                                            | 143.10  | 143.24                                            | 143.31  | 143.05  | 0.50    | 0.36                                                    | 0.29    | 0.55    |  |
| 5                | 108.1                                            | 105.75  | 105.80                                            | 105.76  | 105.75  | 2.35    | 2.30                                                    | 2.34    | 2.35    |  |
| 6                | 165.8                                            | 160.89  | 160.91                                            | 160.89  | 160.92  | 4.91    | 4.89                                                    | 4.91    | 4.88    |  |
| 7                | 102.3                                            | 101.15  | 101.10                                            | 101.10  | 101.15  | 1.15    | 1.20                                                    | 1.20    | 1.15    |  |
| 8                | 166.4                                            | 165.73  | 165.74                                            | 165.75  | 165.76  | 0.67    | 0.66                                                    | 0.65    | 0.64    |  |
| 8a               | 101.8                                            | 104.34  | 104.27                                            | 104.25  | 104.32  | 2.54    | 2.47                                                    | 2.45    | 2.52    |  |
| 9                | 42.2                                             | 40.76   | 38.21                                             | 40.74   | 42.54   | 1.44    | 3.99                                                    | 1.46    | 0.34    |  |
| 10               | 75.2                                             | 64.23   | 65.24                                             | 71.87   | 71.21   | 10.97   | 9.96                                                    | 3.33    | 3.99    |  |
| 11               | 32.5                                             | 31.53   | 30.46                                             | 30.94   | 31.66   | 0.97    | 2.04                                                    | 1.56    | 0.84    |  |
| 12               | 22.6                                             | 20.24   | 20.19                                             | 24.80   | 24.74   | 2.36    | 2.41                                                    | 2.20    | 2.14    |  |
| 13               | 33.8                                             | 30.21   | 30.54                                             | 32.33   | 32.55   | 3.59    | 3.26                                                    | 1.47    | 1.25    |  |
| 14               | 75.5                                             | 66.65   | 66.18                                             | 71.98   | 71.73   | 8.85    | 9.32                                                    | 3.52    | 3.77    |  |
| 15               | 24.7                                             | 18.45   | 19.27                                             | 22.82   | 22.76   | 6.25    | 5.43                                                    | 1.88    | 1.94    |  |
| MAE <sup>b</sup> |                                                  |         |                                                   |         |         | 3.76    | 3.85                                                    | 2.53    | 2.53    |  |

<sup>a</sup>  $|\Delta\delta|(^{13}\text{C}) = |\delta_{\text{exp}} - \delta_{\text{calc}}| (^{13}\text{C}), \text{ppm}$ : absolute differences for experimental versus calculated <sup>13</sup>C NMR chemical shifts

<sup>b</sup>  $\text{MAE} = \Sigma[|(\delta_{\text{exp}} - \delta_{\text{calcd}})|]/n$ , summation through n of the absolute error values (difference of the absolute values between corresponding experimental and <sup>13</sup>C chemical shifts), normalized to the number of the chemical shifts



**Table S4.**  $^{13}\text{C}$  experimental related to exp\_1d set of data and calculated NMR chemical shifts (MPW1PW91/6-31g(d,p) level of theory) related to calc\_1a, calc\_1b, calc\_1c, calc\_1d sets of data, with  $^a|\Delta\delta|(^{13}\text{C})$  and  $^b\text{MAE}$  values. Chemical shift data here reported were produced using benzene as reference compound for  $\text{sp}^2$  carbons (highlighted in yellow), and tetramethylsilane (TMS) for  $\text{sp}^3$  carbons.

| Position         | $\delta_{\text{exp}}(^{13}\text{C}), \text{ppm}$ |  | $\delta_{\text{calc}}(^{13}\text{C}), \text{ppm}$ |         |         |         | $ \Delta\delta (^{13}\text{C}), \text{ppm}^a$ |         |         |         |
|------------------|--------------------------------------------------|--|---------------------------------------------------|---------|---------|---------|-----------------------------------------------|---------|---------|---------|
|                  | exp_1d                                           |  | calc_1a                                           | calc_1b | calc_1c | calc_1d | calc_1a                                       | calc_1b | calc_1c | calc_1d |
| 1                | 171.7                                            |  | 163.65                                            | 163.79  | 163.82  | 163.62  | 8.05                                          | 7.91    | 7.88    | 8.08    |
| 3                | 77.6                                             |  | 72.81                                             | 73.56   | 73.37   | 72.48   | 4.79                                          | 4.04    | 4.23    | 5.12    |
| 4                | 34.6                                             |  | 34.93                                             | 33.52   | 33.73   | 35.02   | 0.33                                          | 1.08    | 0.87    | 0.42    |
| 4a               | 143.7                                            |  | 143.10                                            | 143.24  | 143.31  | 143.05  | 0.60                                          | 0.46    | 0.39    | 0.65    |
| 5                | 108.0                                            |  | 105.75                                            | 105.80  | 105.76  | 105.75  | 2.25                                          | 2.20    | 2.24    | 2.25    |
| 6                | 165.8                                            |  | 160.89                                            | 160.91  | 160.89  | 160.92  | 4.91                                          | 4.89    | 4.91    | 4.88    |
| 7                | 102.3                                            |  | 101.15                                            | 101.10  | 101.10  | 101.15  | 1.15                                          | 1.20    | 1.20    | 1.15    |
| 8                | 166.4                                            |  | 165.73                                            | 165.74  | 165.75  | 165.76  | 0.67                                          | 0.66    | 0.65    | 0.64    |
| 8a               | 101.7                                            |  | 104.34                                            | 104.27  | 104.25  | 104.32  | 2.64                                          | 2.57    | 2.55    | 2.62    |
| 9                | 43.0                                             |  | 40.76                                             | 38.21   | 40.74   | 42.54   | 2.24                                          | 4.79    | 2.26    | 0.46    |
| 10               | 74.8                                             |  | 64.23                                             | 65.24   | 71.87   | 71.21   | 10.57                                         | 9.56    | 2.93    | 3.59    |
| 11               | 33.1                                             |  | 31.53                                             | 30.46   | 30.94   | 31.66   | 1.57                                          | 2.64    | 2.16    | 1.44    |
| 12               | 22.5                                             |  | 20.24                                             | 20.19   | 24.80   | 24.74   | 2.26                                          | 2.31    | 2.30    | 2.24    |
| 13               | 34.5                                             |  | 30.21                                             | 30.54   | 32.33   | 32.55   | 4.29                                          | 3.96    | 2.17    | 1.95    |
| 14               | 75.3                                             |  | 66.65                                             | 66.18   | 71.98   | 71.73   | 8.65                                          | 9.12    | 3.32    | 3.57    |
| 15               | 24.8                                             |  | 18.45                                             | 19.27   | 22.82   | 22.76   | 6.35                                          | 5.53    | 1.98    | 2.04    |
| MAE <sup>b</sup> |                                                  |  |                                                   |         |         |         | 3.83                                          | 3.93    | 2.63    | 2.57    |

<sup>a</sup>  $|\Delta\delta|(^{13}\text{C}) = |\delta_{\text{exp}} - \delta_{\text{calc}}|(^{13}\text{C}), \text{ppm}$ : absolute differences for experimental versus calculated  $^{13}\text{C}$  NMR chemical shifts

<sup>b</sup>  $\text{MAE} = \Sigma[|(\delta_{\text{exp}} - \delta_{\text{calcd}})|]/n$ , summation through n of the absolute error values (difference of the absolute values between corresponding experimental and  $^{13}\text{C}$  chemical shifts), normalized to the number of the chemical shifts

**Table S5.**  $^{13}\text{C}$  experimental related to exp\_1a set of data and calculated NMR chemical shifts (MPW1PW91/6-311+g(d,p) level of theory) related to calc\_1a, calc\_1b, calc\_1c, calc\_1d sets of data, with  $^a|\Delta\delta|(^{13}\text{C})$  and  $^b\text{MAE}$  values. Chemical shift data here reported were produced using benzene as reference compound for  $\text{sp}^2$  carbons (highlighted in yellow), and tetramethylsilane (TMS) for  $\text{sp}^3$  carbons.

| Position         | $\delta_{\text{exp}}(^{13}\text{C}), \text{ppm}$ |         | $\delta_{\text{calc}}(^{13}\text{C}), \text{ppm}$ |         |         | $ \Delta\delta (^{13}\text{C}), \text{ppm}^a$ |         |         |         |
|------------------|--------------------------------------------------|---------|---------------------------------------------------|---------|---------|-----------------------------------------------|---------|---------|---------|
|                  | exp_1a                                           | calc_1a | calc_1b                                           | calc_1c | calc_1d | calc_1a                                       | calc_1b | calc_1c | calc_1d |
| 1                | 169.9                                            | 174.92  | 174.85                                            | 174.99  | 174.84  | 5.02                                          | 4.95    | 5.09    | 4.94    |
| 3                | 76.3                                             | 76.11   | 77.30                                             | 77.23   | 75.96   | 0.19                                          | 1.00    | 0.93    | 0.34    |
| 4                | 33.6                                             | 37.32   | 35.68                                             | 35.96   | 37.41   | 3.72                                          | 2.08    | 2.36    | 3.81    |
| 4a               | 141.8                                            | 143.90  | 144.02                                            | 144.05  | 143.74  | 2.10                                          | 2.22    | 2.25    | 1.94    |
| 5                | 106.7                                            | 104.22  | 103.73                                            | 103.70  | 104.59  | 2.48                                          | 2.97    | 3.00    | 2.11    |
| 6                | 163.1                                            | 163.20  | 163.66                                            | 163.57  | 163.48  | 0.10                                          | 0.56    | 0.47    | 0.38    |
| 7                | 102.0                                            | 98.44   | 98.67                                             | 98.64   | 98.83   | 3.56                                          | 3.33    | 3.36    | 3.17    |
| 8                | 164.3                                            | 167.21  | 167.47                                            | 167.47  | 167.13  | 2.91                                          | 3.17    | 3.17    | 2.83    |
| 8a               | 101.5                                            | 100.45  | 100.42                                            | 100.43  | 100.19  | 1.05                                          | 1.08    | 1.07    | 1.31    |
| 9                | 39.3                                             | 43.97   | 40.97                                             | 43.72   | 45.32   | 4.67                                          | 1.67    | 4.42    | 6.02    |
| 10               | 66.6                                             | 66.34   | 68.35                                             | 75.57   | 74.23   | 0.26                                          | 1.75    | 8.97    | 7.63    |
| 11               | 30.9                                             | 34.67   | 33.04                                             | 33.68   | 34.59   | 3.77                                          | 2.14    | 2.78    | 3.69    |
| 12               | 18.1                                             | 22.22   | 22.10                                             | 27.49   | 27.31   | 4.12                                          | 4.00    | 9.39    | 9.21    |
| 13               | 30.9                                             | 33.13   | 33.71                                             | 35.67   | 35.97   | 2.23                                          | 2.81    | 4.77    | 5.07    |
| 14               | 68.0                                             | 70.78   | 70.14                                             | 76.32   | 75.88   | 2.78                                          | 2.14    | 8.32    | 7.88    |
| 15               | 18.9                                             | 18.69   | 20.13                                             | 23.93   | 23.97   | 0.21                                          | 1.23    | 5.03    | 5.07    |
| MAE <sup>b</sup> |                                                  |         |                                                   |         |         | 2.45                                          | 2.32    | 4.09    | 4.09    |

<sup>a</sup>  $|\Delta\delta|(^{13}\text{C}) = |\delta_{\text{exp}} - \delta_{\text{calc}}|(^{13}\text{C}), \text{ppm}$ : absolute differences for experimental versus calculated  $^{13}\text{C}$  NMR chemical shifts

<sup>b</sup>  $\text{MAE} = \sum[|(\delta_{\text{exp}} - \delta_{\text{calcd}})|]/n$ , summation through n of the absolute error values (difference of the absolute values between corresponding experimental and  $^{13}\text{C}$  chemical shifts), normalized to the number of the chemical shifts

**Table S6.**  $^{13}\text{C}$  experimental related to exp\_1b set of data and calculated NMR chemical shifts (MPW1PW91/6-311+g(d,p) level of theory) related to calc\_1a, calc\_1b, calc\_1c, calc\_1d sets of data, with <sup>a</sup> $|\Delta\delta|(^{13}\text{C})$  and <sup>b</sup>MAE values. Chemical shift data here reported were produced using benzene as reference compound for  $\text{sp}^2$  carbons (highlighted in yellow), and tetramethylsilane (TMS) for  $\text{sp}^3$  carbons.

| Position         | $\delta_{\text{exp}}(^{13}\text{C}), \text{ppm}$ |         | $\delta_{\text{calc}}(^{13}\text{C}), \text{ppm}$ |         |         |         | $ \Delta\delta (^{13}\text{C}), \text{ppm}^{\text{a}}$ |         |         |  |
|------------------|--------------------------------------------------|---------|---------------------------------------------------|---------|---------|---------|--------------------------------------------------------|---------|---------|--|
|                  | exp_1b                                           | calc_1a | calc_1b                                           | calc_1c | calc_1d | calc_1a | calc_1b                                                | calc_1c | calc_1d |  |
| 1                | 170.0                                            | 174.92  | 174.85                                            | 174.99  | 174.84  | 4.92    | 4.85                                                   | 4.99    | 4.84    |  |
| 3                | 76.6                                             | 76.11   | 77.30                                             | 77.23   | 75.96   | 0.49    | 0.70                                                   | 0.63    | 0.64    |  |
| 4                | 32.6                                             | 37.32   | 35.68                                             | 35.96   | 37.41   | 4.72    | 3.08                                                   | 3.36    | 4.81    |  |
| 4a               | 141.6                                            | 143.90  | 144.02                                            | 144.05  | 143.74  | 2.30    | 2.42                                                   | 2.45    | 2.14    |  |
| 5                | 106.7                                            | 104.22  | 103.73                                            | 103.70  | 104.59  | 2.48    | 2.97                                                   | 3.00    | 2.11    |  |
| 6                | 163.0                                            | 163.20  | 163.66                                            | 163.57  | 163.48  | 0.20    | 0.66                                                   | 0.57    | 0.48    |  |
| 7                | 102.0                                            | 98.44   | 98.67                                             | 98.64   | 98.83   | 3.56    | 3.33                                                   | 3.36    | 3.17    |  |
| 8                | 164.4                                            | 167.21  | 167.47                                            | 167.47  | 167.13  | 2.81    | 3.07                                                   | 3.07    | 2.73    |  |
| 8a               | 101.6                                            | 100.45  | 100.42                                            | 100.43  | 100.19  | 1.15    | 1.18                                                   | 1.17    | 1.41    |  |
| 9                | 37.3                                             | 43.97   | 40.97                                             | 43.72   | 45.32   | 6.67    | 3.67                                                   | 6.42    | 8.02    |  |
| 10               | 67.2                                             | 66.34   | 68.35                                             | 75.57   | 74.23   | 0.86    | 1.15                                                   | 8.37    | 7.03    |  |
| 11               | 29.8                                             | 34.67   | 33.04                                             | 33.68   | 34.59   | 4.87    | 3.24                                                   | 3.88    | 4.79    |  |
| 12               | 18.1                                             | 22.22   | 22.10                                             | 27.49   | 27.31   | 4.12    | 4.00                                                   | 9.39    | 9.21    |  |
| 13               | 31.5                                             | 33.13   | 33.71                                             | 35.67   | 35.97   | 1.63    | 2.21                                                   | 4.17    | 4.47    |  |
| 14               | 67.4                                             | 70.78   | 70.14                                             | 76.32   | 75.88   | 3.38    | 2.74                                                   | 8.92    | 8.48    |  |
| 15               | 19.7                                             | 18.69   | 20.13                                             | 23.93   | 23.97   | 1.01    | 0.43                                                   | 4.23    | 4.27    |  |
| MAE <sup>b</sup> |                                                  |         |                                                   |         |         | 2.82    | 2.48                                                   | 4.25    | 4.29    |  |

<sup>a</sup>  $|\Delta\delta|(^{13}\text{C}) = |\delta_{\text{exp}} - \delta_{\text{calc}}|(^{13}\text{C}), \text{ppm}$ : absolute differences for experimental versus calculated  $^{13}\text{C}$  NMR chemical shifts

<sup>b</sup>  $\text{MAE} = \sum[|(\delta_{\text{exp}} - \delta_{\text{calcd}})|]/n$ , summation through n of the absolute error values (difference of the absolute values between corresponding experimental and  $^{13}\text{C}$  chemical shifts), normalized to the number of the chemical shifts

**Table S7.**  $^{13}\text{C}$  experimental related to exp\_1c set of data and calculated NMR chemical shifts (MPW1PW91/6-311+g(d,p) level of theory) related to calc\_1a, calc\_1b, calc\_1c, calc\_1d sets of data, with  $^a|\Delta\delta|(^{13}\text{C})$  and  $^b\text{MAE}$  values. Chemical shift data here reported were produced using benzene as reference compound for  $\text{sp}^2$  carbons (highlighted in yellow), and tetramethylsilane (TMS) for  $\text{sp}^3$  carbons.

| Position         | $\delta_{\text{exp}}(^{13}\text{C}), \text{ppm}$ |         | $\delta_{\text{calc}}(^{13}\text{C}), \text{ppm}$ |         |         |         | $ \Delta\delta (^{13}\text{C}), \text{ppm}^a$ |         |         |  |
|------------------|--------------------------------------------------|---------|---------------------------------------------------|---------|---------|---------|-----------------------------------------------|---------|---------|--|
|                  | exp_1c                                           | calc_1a | calc_1b                                           | calc_1c | calc_1d | calc_1a | calc_1b                                       | calc_1c | calc_1d |  |
| 1                | 171.7                                            | 174.92  | 174.85                                            | 174.99  | 174.84  | 3.22    | 3.15                                          | 3.29    | 3.14    |  |
| 3                | 78.0                                             | 76.11   | 77.30                                             | 77.23   | 75.96   | 1.89    | 0.70                                          | 0.77    | 2.04    |  |
| 4                | 34.5                                             | 37.32   | 35.68                                             | 35.96   | 37.41   | 2.82    | 1.18                                          | 1.46    | 2.91    |  |
| 4a               | 143.6                                            | 143.90  | 144.02                                            | 144.05  | 143.74  | 0.30    | 0.42                                          | 0.45    | 0.14    |  |
| 5                | 108.1                                            | 104.22  | 103.73                                            | 103.70  | 104.59  | 3.88    | 4.37                                          | 4.40    | 3.51    |  |
| 6                | 165.8                                            | 163.20  | 163.66                                            | 163.57  | 163.48  | 2.60    | 2.14                                          | 2.23    | 2.32    |  |
| 7                | 102.3                                            | 98.44   | 98.67                                             | 98.64   | 98.83   | 3.86    | 3.63                                          | 3.66    | 3.47    |  |
| 8                | 166.4                                            | 167.21  | 167.47                                            | 167.47  | 167.13  | 0.81    | 1.07                                          | 1.07    | 0.73    |  |
| 8a               | 101.8                                            | 100.45  | 100.42                                            | 100.43  | 100.19  | 1.35    | 1.38                                          | 1.37    | 1.61    |  |
| 9                | 42.2                                             | 43.97   | 40.97                                             | 43.72   | 45.32   | 1.77    | 1.23                                          | 1.52    | 3.12    |  |
| 10               | 75.2                                             | 66.34   | 68.35                                             | 75.57   | 74.23   | 8.86    | 6.85                                          | 0.37    | 0.97    |  |
| 11               | 32.5                                             | 34.67   | 33.04                                             | 33.68   | 34.59   | 2.17    | 0.54                                          | 1.18    | 2.09    |  |
| 12               | 22.6                                             | 22.22   | 22.10                                             | 27.49   | 27.31   | 0.38    | 0.50                                          | 4.89    | 4.71    |  |
| 13               | 33.8                                             | 33.13   | 33.71                                             | 35.67   | 35.97   | 0.67    | 0.09                                          | 1.87    | 2.17    |  |
| 14               | 75.5                                             | 70.78   | 70.14                                             | 76.32   | 75.88   | 4.72    | 5.36                                          | 0.82    | 0.38    |  |
| 15               | 24.7                                             | 18.69   | 20.13                                             | 23.93   | 23.97   | 6.01    | 4.57                                          | 0.77    | 0.73    |  |
| MAE <sup>b</sup> |                                                  |         |                                                   |         |         | 2.83    | 2.32                                          | 1.88    | 2.13    |  |

<sup>a</sup>  $|\Delta\delta|(^{13}\text{C}) = |\delta_{\text{exp}} - \delta_{\text{calc}}|(^{13}\text{C}), \text{ppm}$ : absolute differences for experimental versus calculated  $^{13}\text{C}$  NMR chemical shifts

<sup>b</sup>  $\text{MAE} = \Sigma[|\delta_{\text{exp}} - \delta_{\text{calcd}}|]/n$ , summation through n of the absolute error values (difference of the absolute values between corresponding experimental and  $^{13}\text{C}$  chemical shifts), normalized to the number of the chemical shifts

**Table S8.**  $^{13}\text{C}$  experimental related to exp\_1d set of data and calculated NMR chemical shifts (MPW1PW91/6-311+g(d,p) level of theory) related to calc\_1a, calc\_1b, calc\_1c, calc\_1d sets of data, with  $^a|\Delta\delta|(^{13}\text{C})$  and  $^b\text{MAE}$  values. Chemical shift data here reported were produced using benzene as reference compound for  $\text{sp}^2$  carbons (highlighted in yellow), and tetramethylsilane (TMS) for  $\text{sp}^3$  carbons.

| Position         | $\delta_{\text{exp}}(^{13}\text{C}), \text{ppm}$ |         | $\delta_{\text{calc}}(^{13}\text{C}), \text{ppm}$ |         |         |         | $ \Delta\delta (^{13}\text{C}), \text{ppm}^a$ |         |         |  |
|------------------|--------------------------------------------------|---------|---------------------------------------------------|---------|---------|---------|-----------------------------------------------|---------|---------|--|
|                  | exp_1d                                           | calc_1a | calc_1b                                           | calc_1c | calc_1d | calc_1a | calc_1b                                       | calc_1c | calc_1d |  |
| 1                | 171.7                                            | 174.92  | 174.85                                            | 174.99  | 174.84  | 3.22    | 3.15                                          | 3.29    | 3.14    |  |
| 3                | 77.6                                             | 76.11   | 77.30                                             | 77.23   | 75.96   | 1.49    | 0.30                                          | 0.37    | 1.64    |  |
| 4                | 34.6                                             | 37.32   | 35.68                                             | 35.96   | 37.41   | 2.72    | 1.08                                          | 1.36    | 2.81    |  |
| 4a               | 143.7                                            | 143.90  | 144.02                                            | 144.05  | 143.74  | 0.20    | 0.32                                          | 0.35    | 0.04    |  |
| 5                | 108.0                                            | 104.22  | 103.73                                            | 103.70  | 104.59  | 3.78    | 4.27                                          | 4.30    | 3.41    |  |
| 6                | 165.8                                            | 163.20  | 163.66                                            | 163.57  | 163.48  | 2.60    | 2.14                                          | 2.23    | 2.32    |  |
| 7                | 102.3                                            | 98.44   | 98.67                                             | 98.64   | 98.83   | 3.86    | 3.63                                          | 3.66    | 3.47    |  |
| 8                | 166.4                                            | 167.21  | 167.47                                            | 167.47  | 167.13  | 0.81    | 1.07                                          | 1.07    | 0.73    |  |
| 8a               | 101.7                                            | 100.45  | 100.42                                            | 100.43  | 100.19  | 1.25    | 1.28                                          | 1.27    | 1.51    |  |
| 9                | 43.0                                             | 43.97   | 40.97                                             | 43.72   | 45.32   | 0.97    | 2.03                                          | 0.72    | 2.32    |  |
| 10               | 74.8                                             | 66.34   | 68.35                                             | 75.57   | 74.23   | 8.46    | 6.45                                          | 0.77    | 0.57    |  |
| 11               | 33.1                                             | 34.67   | 33.04                                             | 33.68   | 34.59   | 1.57    | 0.06                                          | 0.58    | 1.49    |  |
| 12               | 22.5                                             | 22.22   | 22.10                                             | 27.49   | 27.31   | 0.28    | 0.40                                          | 4.99    | 4.81    |  |
| 13               | 34.5                                             | 33.13   | 33.71                                             | 35.67   | 35.97   | 1.37    | 0.79                                          | 1.17    | 1.47    |  |
| 14               | 75.3                                             | 70.78   | 70.14                                             | 76.32   | 75.88   | 4.52    | 5.16                                          | 1.02    | 0.58    |  |
| 15               | 24.8                                             | 18.69   | 20.13                                             | 23.93   | 23.97   | 6.11    | 4.67                                          | 0.87    | 0.83    |  |
| MAE <sup>b</sup> |                                                  |         |                                                   |         |         | 2.70    | 2.30                                          | 1.75    | 1.95    |  |

<sup>a</sup>  $|\Delta\delta|(^{13}\text{C}) = |\delta_{\text{exp}} - \delta_{\text{calc}}|(^{13}\text{C}), \text{ppm}$ : absolute differences for experimental versus calculated  $^{13}\text{C}$  NMR chemical shifts

<sup>b</sup>  $\text{MAE} = \Sigma[|(\delta_{\text{exp}} - \delta_{\text{calcd}})|]/n$ , summation through n of the absolute error values (difference of the absolute values between corresponding experimental and  $^{13}\text{C}$  chemical shifts), normalized to the number of the chemical shifts

**Table S9.**  $^{13}\text{C}$  experimental related to exp\_1a set of data and calculated NMR chemical shifts (B97-2/cc-pVTZ level of theory) related to calc\_1a, calc\_1b, calc\_1c, calc\_1d sets of data, with <sup>a</sup> $|\Delta\delta|(^{13}\text{C})$  and <sup>b</sup>MAE values. Chemical shift data here reported were produced using benzene as reference compound for  $\text{sp}^2$  carbons (highlighted in yellow), and tetramethylsilane (TMS) for  $\text{sp}^3$  carbons.

| Position         | $\delta_{\text{exp}}(^{13}\text{C}), \text{ppm}$ |         | $\delta_{\text{calc}}(^{13}\text{C}), \text{ppm}$ |         |         |         | $ \Delta\delta (^{13}\text{C}), \text{ppm}^{\text{a}}$ |         |         |  |
|------------------|--------------------------------------------------|---------|---------------------------------------------------|---------|---------|---------|--------------------------------------------------------|---------|---------|--|
|                  | exp_1a                                           | calc_1a | calc_1b                                           | calc_1c | calc_1d | calc_1a | calc_1b                                                | calc_1c | calc_1d |  |
| 1                | 169.9                                            | 163.65  | 163.79                                            | 163.82  | 163.62  | 6.25    | 6.11                                                   | 6.08    | 6.29    |  |
| 3                | 76.3                                             | 72.81   | 73.56                                             | 73.37   | 72.48   | 3.49    | 2.74                                                   | 2.93    | 3.82    |  |
| 4                | 33.6                                             | 34.93   | 33.52                                             | 33.73   | 35.02   | 1.33    | 0.08                                                   | 0.13    | 1.42    |  |
| 4a               | 141.8                                            | 145.27  | 145.07                                            | 145.11  | 145.30  | 3.47    | 3.27                                                   | 3.31    | 3.50    |  |
| 5                | 106.7                                            | 104.00  | 104.01                                            | 104.00  | 104.01  | 2.70    | 2.69                                                   | 2.70    | 2.69    |  |
| 6                | 163.1                                            | 164.20  | 164.19                                            | 164.17  | 164.08  | 1.10    | 1.09                                                   | 1.07    | 0.98    |  |
| 7                | 102.0                                            | 98.85   | 98.84                                             | 98.80   | 98.83   | 3.15    | 3.16                                                   | 3.20    | 3.17    |  |
| 8                | 164.3                                            | 168.76  | 168.71                                            | 168.70  | 168.71  | 4.46    | 4.41                                                   | 4.40    | 4.41    |  |
| 8a               | 101.5                                            | 101.38  | 101.20                                            | 101.15  | 101.45  | 0.12    | 0.30                                                   | 0.35    | 0.05    |  |
| 9                | 39.3                                             | 40.76   | 38.21                                             | 40.74   | 42.54   | 1.46    | 1.09                                                   | 1.44    | 3.24    |  |
| 10               | 66.6                                             | 64.23   | 65.24                                             | 71.87   | 71.21   | 2.37    | 1.36                                                   | 5.27    | 4.61    |  |
| 11               | 30.9                                             | 31.53   | 30.46                                             | 30.94   | 31.66   | 0.63    | 0.44                                                   | 0.04    | 0.76    |  |
| 12               | 18.1                                             | 20.24   | 20.19                                             | 24.80   | 24.74   | 2.14    | 2.09                                                   | 6.70    | 6.64    |  |
| 13               | 30.9                                             | 30.21   | 30.54                                             | 32.33   | 32.55   | 0.69    | 0.36                                                   | 1.43    | 1.65    |  |
| 14               | 68.0                                             | 66.65   | 66.18                                             | 71.98   | 71.73   | 1.35    | 1.82                                                   | 3.98    | 3.73    |  |
| 15               | 18.9                                             | 18.45   | 19.27                                             | 22.82   | 22.76   | 0.45    | 0.37                                                   | 3.92    | 3.86    |  |
| MAE <sup>b</sup> |                                                  |         |                                                   |         |         | 2.20    | 1.96                                                   | 2.93    | 3.18    |  |

<sup>a</sup>  $|\Delta\delta|(^{13}\text{C}) = |\delta_{\text{exp}} - \delta_{\text{calc}}|(^{13}\text{C}), \text{ppm}$ : absolute differences for experimental versus calculated  $^{13}\text{C}$  NMR chemical shifts

<sup>b</sup>  $\text{MAE} = \Sigma[|(\delta_{\text{exp}} - \delta_{\text{calcd}})|]/n$ , summation through n of the absolute error values (difference of the absolute values between corresponding experimental and  $^{13}\text{C}$  chemical shifts), normalized to the number of the chemical shifts

**Table S10.**  $^{13}\text{C}$  experimental related to exp\_1b set of data and calculated NMR chemical shifts (B97-2/cc-pVTZ level of theory) related to calc\_1a, calc\_1b, calc\_1c, calc\_1d sets of data, with  $^a|\Delta\delta|(^{13}\text{C})$  and  $^b\text{MAE}$  values. Chemical shift data here reported were produced using benzene as reference compound for  $\text{sp}^2$  carbons (highlighted in yellow), and tetramethylsilane (TMS) for  $\text{sp}^3$  carbons.

| Position         | $\delta_{\text{exp}}(^{13}\text{C}), \text{ppm}$ |  | $\delta_{\text{calc}}(^{13}\text{C}), \text{ppm}$ |         |         |         | $ \Delta\delta (^{13}\text{C}), \text{ppm}^a$ |         |         |         |
|------------------|--------------------------------------------------|--|---------------------------------------------------|---------|---------|---------|-----------------------------------------------|---------|---------|---------|
|                  | exp_1b                                           |  | calc_1a                                           | calc_1b | calc_1c | calc_1d | calc_1a                                       | calc_1b | calc_1c | calc_1d |
| 1                | 170.0                                            |  | 163.65                                            | 163.79  | 163.82  | 163.62  | 6.35                                          | 6.21    | 6.18    | 6.38    |
| 3                | 76.6                                             |  | 72.81                                             | 73.56   | 73.37   | 72.48   | 3.79                                          | 3.04    | 3.23    | 4.12    |
| 4                | 32.6                                             |  | 34.93                                             | 33.52   | 33.73   | 35.02   | 2.33                                          | 0.92    | 1.13    | 2.42    |
| 4a               | 141.6                                            |  | 145.27                                            | 145.07  | 145.11  | 145.30  | 3.67                                          | 3.47    | 3.51    | 3.70    |
| 5                | 106.7                                            |  | 104.00                                            | 104.01  | 104.00  | 104.01  | 2.70                                          | 2.69    | 2.70    | 2.69    |
| 6                | 163.0                                            |  | 164.20                                            | 164.19  | 164.17  | 164.08  | 1.20                                          | 1.19    | 1.17    | 1.08    |
| 7                | 102.0                                            |  | 98.85                                             | 98.84   | 98.80   | 98.83   | 3.15                                          | 3.16    | 3.20    | 3.17    |
| 8                | 164.4                                            |  | 168.76                                            | 168.71  | 168.70  | 168.71  | 4.36                                          | 4.31    | 4.30    | 4.31    |
| 8a               | 101.6                                            |  | 101.38                                            | 101.20  | 101.15  | 101.45  | 0.22                                          | 0.40    | 0.45    | 0.15    |
| 9                | 37.3                                             |  | 40.76                                             | 38.21   | 40.74   | 42.54   | 3.46                                          | 0.91    | 3.44    | 5.24    |
| 10               | 67.2                                             |  | 64.23                                             | 65.24   | 71.87   | 71.21   | 2.97                                          | 1.96    | 4.67    | 4.01    |
| 11               | 29.8                                             |  | 31.53                                             | 30.46   | 30.94   | 31.66   | 1.73                                          | 0.66    | 1.14    | 1.86    |
| 12               | 18.1                                             |  | 20.24                                             | 20.19   | 24.80   | 24.74   | 2.14                                          | 2.09    | 6.70    | 6.64    |
| 13               | 31.5                                             |  | 30.21                                             | 30.54   | 32.33   | 32.55   | 1.29                                          | 0.96    | 0.83    | 1.05    |
| 14               | 67.4                                             |  | 66.65                                             | 66.18   | 71.98   | 71.73   | 0.75                                          | 1.22    | 4.58    | 4.33    |
| 15               | 19.7                                             |  | 18.45                                             | 19.27   | 22.82   | 22.76   | 1.25                                          | 0.43    | 3.12    | 3.06    |
| MAE <sup>b</sup> |                                                  |  |                                                   |         |         |         | 2.58                                          | 2.10    | 3.15    | 3.39    |

<sup>a</sup>  $|\Delta\delta|(^{13}\text{C}) = |\delta_{\text{exp}} - \delta_{\text{calc}}|(^{13}\text{C}), \text{ppm}$ : absolute differences for experimental versus calculated  $^{13}\text{C}$  NMR chemical shifts

<sup>b</sup>  $\text{MAE} = \Sigma[|(\delta_{\text{exp}} - \delta_{\text{calcd}})|]/n$ , summation through n of the absolute error values (difference of the absolute values between corresponding experimental and  $^{13}\text{C}$  chemical shifts), normalized to the number of the chemical shifts

**Table S11.**  $^{13}\text{C}$  experimental related to exp\_1c set of data and calculated NMR chemical shifts (B97-2/cc-pVTZ level of theory) related to calc\_1a, calc\_1b, calc\_1c, calc\_1d sets of data, with  $^a|\Delta\delta|(^{13}\text{C})$  and  $^b\text{MAE}$  values. Chemical shift data here reported were produced using benzene as reference compound for  $\text{sp}^2$  carbons (highlighted in yellow), and tetramethylsilane (TMS) for  $\text{sp}^3$  carbons.

| Position         | $\delta_{\text{exp}}(^{13}\text{C}), \text{ppm}$ |         |         |         |         | $\delta_{\text{calc}}(^{13}\text{C}), \text{ppm}$ |         |         |         | $ \Delta\delta (^{13}\text{C}), \text{ppm}^a$ |         |         |         |
|------------------|--------------------------------------------------|---------|---------|---------|---------|---------------------------------------------------|---------|---------|---------|-----------------------------------------------|---------|---------|---------|
|                  | exp_1c                                           | calc_1a | calc_1b | calc_1c | calc_1d | calc_1a                                           | calc_1b | calc_1c | calc_1d | calc_1a                                       | calc_1b | calc_1c | calc_1d |
| 1                | 171.7                                            | 163.65  | 163.79  | 163.82  | 163.62  | 8.05                                              | 7.91    | 7.88    | 8.08    |                                               |         |         |         |
| 3                | 78.0                                             | 72.81   | 73.56   | 73.37   | 72.48   | 5.19                                              | 4.44    | 4.63    | 5.52    |                                               |         |         |         |
| 4                | 34.5                                             | 34.93   | 33.52   | 33.73   | 35.02   | 0.43                                              | 0.98    | 0.77    | 0.52    |                                               |         |         |         |
| 4a               | 143.6                                            | 145.27  | 145.07  | 145.11  | 145.30  | 1.67                                              | 1.47    | 1.51    | 1.70    |                                               |         |         |         |
| 5                | 108.1                                            | 104.00  | 104.01  | 104.00  | 104.01  | 4.10                                              | 4.09    | 4.10    | 4.09    |                                               |         |         |         |
| 6                | 165.8                                            | 164.20  | 164.19  | 164.17  | 164.08  | 1.60                                              | 1.61    | 1.63    | 1.72    |                                               |         |         |         |
| 7                | 102.3                                            | 98.85   | 98.84   | 98.80   | 98.83   | 3.45                                              | 3.46    | 3.50    | 3.47    |                                               |         |         |         |
| 8                | 166.4                                            | 168.76  | 168.71  | 168.70  | 168.71  | 2.36                                              | 2.31    | 2.30    | 2.31    |                                               |         |         |         |
| 8a               | 101.8                                            | 101.38  | 101.20  | 101.15  | 101.45  | 0.42                                              | 0.60    | 0.65    | 0.35    |                                               |         |         |         |
| 9                | 42.2                                             | 40.76   | 38.21   | 40.74   | 42.54   | 1.44                                              | 3.99    | 1.46    | 0.34    |                                               |         |         |         |
| 10               | 75.2                                             | 64.23   | 65.24   | 71.87   | 71.21   | 10.97                                             | 9.96    | 3.33    | 3.99    |                                               |         |         |         |
| 11               | 32.5                                             | 31.53   | 30.46   | 30.94   | 31.66   | 0.97                                              | 2.04    | 1.56    | 0.84    |                                               |         |         |         |
| 12               | 22.6                                             | 20.24   | 20.19   | 24.80   | 24.74   | 2.36                                              | 2.41    | 2.20    | 2.14    |                                               |         |         |         |
| 13               | 33.8                                             | 30.21   | 30.54   | 32.33   | 32.55   | 3.59                                              | 3.26    | 1.47    | 1.25    |                                               |         |         |         |
| 14               | 75.5                                             | 66.65   | 66.18   | 71.98   | 71.73   | 8.85                                              | 9.32    | 3.52    | 3.77    |                                               |         |         |         |
| 15               | 24.7                                             | 18.45   | 19.27   | 22.82   | 22.76   | 6.25                                              | 5.43    | 1.88    | 1.94    |                                               |         |         |         |
| MAE <sup>b</sup> |                                                  |         |         |         |         | 3.86                                              | 3.96    | 2.65    | 2.63    |                                               |         |         |         |

<sup>a</sup>  $|\Delta\delta|(^{13}\text{C}) = |\delta_{\text{exp}} - \delta_{\text{calc}}|(^{13}\text{C}), \text{ppm}$ : absolute differences for experimental versus calculated  $^{13}\text{C}$  NMR chemical shifts

<sup>b</sup>  $\text{MAE} = \sum[|\delta_{\text{exp}} - \delta_{\text{calc}}|]/n$ , summation through n of the absolute error values (difference of the absolute values between corresponding experimental and  $^{13}\text{C}$  chemical shifts), normalized to the number of the chemical shifts



**Table S12.**  $^{13}\text{C}$  experimental related to exp\_1d set of data and calculated NMR chemical shifts (B97-2/cc-pVTZ level of theory) related to calc\_1a, calc\_1b, calc\_1c, calc\_1d sets of data, with  $^a|\Delta\delta|(^{13}\text{C})$  and  $^b\text{MAE}$  values. Chemical shift data here reported were produced using benzene as reference compound for  $\text{sp}^2$  carbons (highlighted in yellow), and tetramethylsilane (TMS) for  $\text{sp}^3$  carbons.

| Position         | $\delta_{\text{exp}}(^{13}\text{C}), \text{ppm}$ |         |         |         |         | $\delta_{\text{calc}}(^{13}\text{C}), \text{ppm}$ |         |         |         | $ \Delta\delta  (^{13}\text{C}), \text{ppm}^a$ |         |         |         |
|------------------|--------------------------------------------------|---------|---------|---------|---------|---------------------------------------------------|---------|---------|---------|------------------------------------------------|---------|---------|---------|
|                  | exp_1d                                           | calc_1a | calc_1b | calc_1c | calc_1d | calc_1a                                           | calc_1b | calc_1c | calc_1d | calc_1a                                        | calc_1b | calc_1c | calc_1d |
| 1                | 171.7                                            | 163.65  | 163.79  | 163.82  | 163.62  | 8.05                                              | 7.91    | 7.88    | 8.08    |                                                |         |         |         |
| 3                | 77.6                                             | 72.81   | 73.56   | 73.37   | 72.48   | 4.79                                              | 4.04    | 4.23    | 5.12    |                                                |         |         |         |
| 4                | 34.6                                             | 34.93   | 33.52   | 33.73   | 35.02   | 0.33                                              | 1.08    | 0.87    | 0.42    |                                                |         |         |         |
| 4a               | 143.7                                            | 145.27  | 145.07  | 145.11  | 145.30  | 1.57                                              | 1.37    | 1.41    | 1.60    |                                                |         |         |         |
| 5                | 108.0                                            | 104.00  | 104.01  | 104.00  | 104.01  | 4.00                                              | 3.99    | 4.00    | 3.99    |                                                |         |         |         |
| 6                | 165.8                                            | 164.20  | 164.19  | 164.17  | 164.08  | 1.60                                              | 1.61    | 1.63    | 1.72    |                                                |         |         |         |
| 7                | 102.3                                            | 98.85   | 98.84   | 98.80   | 98.83   | 3.45                                              | 3.46    | 3.50    | 3.47    |                                                |         |         |         |
| 8                | 166.4                                            | 168.76  | 168.71  | 168.70  | 168.71  | 2.36                                              | 2.31    | 2.30    | 2.31    |                                                |         |         |         |
| 8a               | 101.7                                            | 101.38  | 101.20  | 101.15  | 101.45  | 0.32                                              | 0.50    | 0.55    | 0.25    |                                                |         |         |         |
| 9                | 43.0                                             | 40.76   | 38.21   | 40.74   | 42.54   | 2.24                                              | 4.79    | 2.26    | 0.46    |                                                |         |         |         |
| 10               | 74.8                                             | 64.23   | 65.24   | 71.87   | 71.21   | 10.57                                             | 9.56    | 2.93    | 3.59    |                                                |         |         |         |
| 11               | 33.1                                             | 31.53   | 30.46   | 30.94   | 31.66   | 1.57                                              | 2.64    | 2.16    | 1.44    |                                                |         |         |         |
| 12               | 22.5                                             | 20.24   | 20.19   | 24.80   | 24.74   | 2.26                                              | 2.31    | 2.30    | 2.24    |                                                |         |         |         |
| 13               | 34.5                                             | 30.21   | 30.54   | 32.33   | 32.55   | 4.29                                              | 3.96    | 2.17    | 1.95    |                                                |         |         |         |
| 14               | 75.3                                             | 66.65   | 66.18   | 71.98   | 71.73   | 8.65                                              | 9.12    | 3.32    | 3.57    |                                                |         |         |         |
| 15               | 24.8                                             | 18.45   | 19.27   | 22.82   | 22.76   | 6.35                                              | 5.53    | 1.98    | 2.04    |                                                |         |         |         |
| MAE <sup>b</sup> |                                                  |         |         |         |         | 3.90                                              | 4.01    | 2.72    | 2.64    |                                                |         |         |         |

<sup>a</sup>  $|\Delta\delta|(^{13}\text{C}) = |\delta_{\text{exp}} - \delta_{\text{calc}}| (^{13}\text{C}), \text{ppm}$ : absolute differences for experimental versus calculated  $^{13}\text{C}$  NMR chemical shifts

<sup>b</sup>  $\text{MAE} = \Sigma[|(\delta_{\text{exp}} - \delta_{\text{calcd}})|]/n$ , summation through n of the absolute error values (difference of the absolute values between corresponding experimental and  $^{13}\text{C}$  chemical shifts), normalized to the number of the chemical shifts

**Table S13.** Comparison of the results obtained by computing the MAE<sub>ΔΔδ</sub> values (bottom) and the AVER\_MAE values (top), the latter defined as the average of the four possible MAE values obtained from the comparison of the calculated and experimental chemical shifts, for each of the 24 comparison alignments. The comparison of the predicting power between the two approaches has been evaluated considering the “% error from the best value” parameter, defined as (e.g. for the AVER\_MAE data):  $((\text{AVER\_MAE}/\text{AVER\_MAE}_{\text{best value}})-1)\times 100$ .

| MPW1PW91/6-31g(d,p)               |          |                                  | MPW1PW91/6-311+g(d,p)             |          |                                  | B97-2/cc-pVTZ                     |          |                                  |
|-----------------------------------|----------|----------------------------------|-----------------------------------|----------|----------------------------------|-----------------------------------|----------|----------------------------------|
| comparison alignment <sup>a</sup> | AVER_MAE | % error from best AVER_MAE value | comparison alignment <sup>a</sup> | AVER_MAE | % error from best AVER_MAE value | comparison alignment <sup>a</sup> | AVER_MAE | % error from best AVER_MAE value |
| exp_1a exp_1b exp_1c exp_1d       | 2.177    | 0.000                            | exp_1a exp_1b exp_1c exp_1d       | 2.190    | 0.000                            | exp_1a exp_1b exp_1c exp_1d       | 2.397    | 0.000                            |
| exp_1a exp_1b exp_1d exp_1c       | 2.191    | 0.643                            | exp_1a exp_1b exp_1d exp_1c       | 2.202    | 0.548                            | exp_1a exp_1b exp_1d exp_1c       | 2.411    | 0.584                            |
| exp_1b exp_1a exp_1c exp_1d       | 2.239    | 2.848                            | exp_1b exp_1a exp_1c exp_1d       | 2.243    | 2.420                            | exp_1b exp_1a exp_1c exp_1d       | 2.459    | 2.587                            |
| exp_1b exp_1a exp_1d exp_1c       | 2.253    | 3.491                            | exp_1b exp_1a exp_1d exp_1c       | 2.255    | 2.968                            | exp_1b exp_1a exp_1d exp_1c       | 2.473    | 3.171                            |
| exp_1c exp_1b exp_1a exp_1d       | 2.671    | 22.692                           | exp_1a exp_1c exp_1d exp_1b       | 2.703    | 23.425                           | exp_1c exp_1b exp_1a exp_1d       | 2.883    | 20.275                           |
| exp_1d exp_1b exp_1a exp_1c       | 2.678    | 23.013                           | exp_1a exp_1d exp_1c exp_1b       | 2.730    | 24.658                           | exp_1d exp_1b exp_1a exp_1c       | 2.891    | 20.609                           |
| exp_1c exp_1a exp_1b exp_1d       | 2.689    | 23.519                           | exp_1a exp_1c exp_1b exp_1d       | 2.742    | 25.205                           | exp_1c exp_1a exp_1b exp_1d       | 2.901    | 21.026                           |
| exp_1d exp_1a exp_1b exp_1c       | 2.697    | 23.886                           | exp_1b exp_1c exp_1d exp_1a       | 2.746    | 25.388                           | exp_1d exp_1a exp_1b exp_1c       | 2.909    | 21.360                           |
| exp_1d exp_1b exp_1c exp_1a       | 2.739    | 25.815                           | exp_1b exp_1d exp_1c exp_1a       | 2.773    | 26.621                           | exp_1d exp_1b exp_1c exp_1a       | 2.957    | 23.363                           |
| exp_1c exp_1b exp_1d exp_1a       | 2.746    | 26.137                           | exp_1a exp_1d exp_1b exp_1c       | 2.781    | 26.986                           | exp_1c exp_1b exp_1d exp_1a       | 2.963    | 23.613                           |
| exp_1d exp_1a exp_1c exp_1b       | 2.758    | 26.688                           | exp_1c exp_1b exp_1d exp_1a       | 2.788    | 27.306                           | exp_1d exp_1a exp_1c exp_1b       | 2.975    | 24.113                           |
| exp_1c exp_1a exp_1d exp_1b       | 2.764    | 26.964                           | exp_1d exp_1b exp_1c exp_1a       | 2.788    | 27.306                           | exp_1c exp_1a exp_1d exp_1b       | 2.981    | 24.364                           |
| exp_1a exp_1c exp_1b exp_1d       | 2.768    | 27.147                           | exp_1b exp_1c exp_1a exp_1d       | 2.795    | 27.626                           | exp_1a exp_1c exp_1b exp_1d       | 2.985    | 24.531                           |
| exp_1a exp_1d exp_1b exp_1c       | 2.778    | 27.607                           | exp_1c exp_1a exp_1d exp_1b       | 2.797    | 27.717                           | exp_1a exp_1d exp_1b exp_1c       | 2.996    | 24.990                           |
| exp_1b exp_1c exp_1a exp_1d       | 2.812    | 29.169                           | exp_1d exp_1a exp_1c exp_1b       | 2.797    | 27.717                           | exp_1b exp_1c exp_1a exp_1d       | 3.029    | 26.366                           |
| exp_1b exp_1d exp_1a exp_1c       | 2.822    | 29.628                           | exp_1b exp_1d exp_1a exp_1c       | 2.834    | 29.406                           | exp_1b exp_1d exp_1a exp_1c       | 3.039    | 26.783                           |
| exp_1a exp_1d exp_1c exp_1b       | 2.839    | 30.409                           | exp_1c exp_1a exp_1b exp_1d       | 2.836    | 29.498                           | exp_1a exp_1d exp_1c exp_1b       | 3.062    | 27.743                           |
| exp_1a exp_1c exp_1d exp_1b       | 2.843    | 30.593                           | exp_1c exp_1b exp_1a exp_1d       | 2.836    | 29.498                           | exp_1a exp_1c exp_1d exp_1b       | 3.065    | 27.868                           |
| exp_1b exp_1d exp_1c exp_1a       | 2.883    | 32.430                           | exp_1d exp_1a exp_1b exp_1c       | 2.849    | 30.091                           | exp_1b exp_1d exp_1c exp_1a       | 3.105    | 29.537                           |
| exp_1b exp_1c exp_1d exp_1a       | 2.886    | 32.568                           | exp_1d exp_1b exp_1a exp_1c       | 2.849    | 30.091                           | exp_1b exp_1c exp_1d exp_1a       | 3.108    | 29.662                           |
| exp_1d exp_1c exp_1a exp_1b       | 3.330    | 52.963                           | exp_1d exp_1c exp_1b exp_1a       | 3.340    | 52.511                           | exp_1d exp_1c exp_1a exp_1b       | 3.544    | 47.851                           |
| exp_1d exp_1c exp_1b exp_1a       | 3.330    | 52.963                           | exp_1d exp_1c exp_1a exp_1b       | 3.350    | 52.968                           | exp_1d exp_1c exp_1b exp_1a       | 3.544    | 47.851                           |
| exp_1c exp_1d exp_1a exp_1b       | 3.333    | 53.101                           | exp_1c exp_1d exp_1b exp_1a       | 3.367    | 53.744                           | exp_1c exp_1d exp_1a exp_1b       | 3.548    | 48.018                           |
| exp_1c exp_1d exp_1b exp_1a       | 3.333    | 53.101                           | exp_1c exp_1d exp_1a exp_1b       | 3.376    | 54.155                           | exp_1c exp_1d exp_1b exp_1a       | 3.548    | 48.018                           |

| MPW1PW91/6-31g(d,p)               |                    |                                            | MPW1PW91/6-311+g(d,p)             |                    |                                            | B97-2/cc-pVTZ                     |                    |                                            |
|-----------------------------------|--------------------|--------------------------------------------|-----------------------------------|--------------------|--------------------------------------------|-----------------------------------|--------------------|--------------------------------------------|
| comparison alignment <sup>a</sup> | MAE <sub>ΔΔε</sub> | % error from best MAE <sub>ΔΔε</sub> value | comparison alignment <sup>a</sup> | MAE <sub>ΔΔε</sub> | % error from best MAE <sub>ΔΔε</sub> value | comparison alignment <sup>a</sup> | MAE <sub>ΔΔε</sub> | % error from best MAE <sub>ΔΔε</sub> value |
| exp_1a exp_1b exp_1c exp_1d       | 1.066              | 0.000                                      | exp_1a exp_1b exp_1c exp_1d       | 1.089              | 0.000                                      | exp_1a exp_1b exp_1c exp_1d       | 1.070              | 0.000                                      |
| exp_1a exp_1b exp_1d exp_1c       | 1.120              | 5.066                                      | exp_1a exp_1b exp_1d exp_1c       | 1.157              | 6.244                                      | exp_1a exp_1b exp_1d exp_1c       | 1.124              | 5.047                                      |
| exp_1b exp_1a exp_1c exp_1d       | 1.224              | 14.822                                     | exp_1b exp_1a exp_1c exp_1d       | 1.291              | 18.549                                     | exp_1b exp_1a exp_1c exp_1d       | 1.232              | 15.140                                     |
| exp_1b exp_1a exp_1d exp_1c       | 1.298              | 21.764                                     | exp_1b exp_1a exp_1d exp_1c       | 1.380              | 26.722                                     | exp_1b exp_1a exp_1d exp_1c       | 1.308              | 22.243                                     |
| exp_1c exp_1b exp_1a exp_1d       | 2.487              | 133.302                                    | exp_1c exp_1b exp_1a exp_1d       | 2.617              | 140.312                                    | exp_1c exp_1b exp_1a exp_1d       | 2.471              | 130.935                                    |
| exp_1d exp_1b exp_1a exp_1c       | 2.515              | 135.929                                    | exp_1d exp_1b exp_1a exp_1c       | 2.635              | 141.965                                    | exp_1d exp_1b exp_1a exp_1c       | 2.496              | 133.271                                    |
| exp_1c exp_1a exp_1b exp_1d       | 2.541              | 138.368                                    | exp_1c exp_1a exp_1b exp_1d       | 2.674              | 145.546                                    | exp_1c exp_1a exp_1b exp_1d       | 2.525              | 135.981                                    |
| exp_1d exp_1b exp_1c exp_1a       | 2.581              | 142.120                                    | exp_1d exp_1b exp_1c exp_1a       | 2.702              | 148.118                                    | exp_1d exp_1a exp_1b exp_1c       | 2.568              | 140.000                                    |
| exp_1d exp_1a exp_1b exp_1c       | 2.585              | 142.495                                    | exp_1a exp_1c exp_1b exp_1d       | 2.706              | 148.485                                    | exp_1d exp_1b exp_1c exp_1a       | 2.582              | 141.308                                    |
| exp_1c exp_1b exp_1d exp_1a       | 2.601              | 143.996                                    | exp_1d exp_1a exp_1b exp_1c       | 2.706              | 148.485                                    | exp_1c exp_1b exp_1d exp_1a       | 2.603              | 143.271                                    |
| exp_1a exp_1c exp_1b exp_1d       | 2.609              | 144.747                                    | exp_1c exp_1b exp_1d exp_1a       | 2.725              | 150.230                                    | exp_1a exp_1c exp_1b exp_1d       | 2.613              | 144.206                                    |
| exp_1a exp_1d exp_1b exp_1c       | 2.647              | 148.311                                    | exp_1a exp_1d exp_1b exp_1c       | 2.743              | 151.882                                    | exp_1a exp_1d exp_1b exp_1c       | 2.650              | 147.664                                    |
| exp_1d exp_1a exp_1c exp_1b       | 2.649              | 148.499                                    | exp_1a exp_1c exp_1d exp_1b       | 2.746              | 152.158                                    | exp_1d exp_1a exp_1c exp_1b       | 2.653              | 147.944                                    |
| exp_1b exp_1c exp_1d exp_1a       | 2.656              | 149.156                                    | exp_1b exp_1c exp_1d exp_1a       | 2.749              | 152.433                                    | exp_1c exp_1a exp_1d exp_1b       | 2.678              | 150.280                                    |
| exp_1c exp_1a exp_1d exp_1b       | 2.671              | 150.563                                    | exp_1a exp_1d exp_1c exp_1b       | 2.773              | 154.637                                    | exp_1b exp_1c exp_1d exp_1a       | 2.681              | 150.561                                    |
| exp_1a exp_1c exp_1d exp_1b       | 2.674              | 150.844                                    | exp_1d exp_1a exp_1c exp_1b       | 2.778              | 155.096                                    | exp_1b exp_1c exp_1a exp_1d       | 2.688              | 151.215                                    |
| exp_1b exp_1c exp_1a exp_1d       | 2.681              | 151.501                                    | exp_1b exp_1d exp_1c exp_1a       | 2.784              | 155.647                                    | exp_1a exp_1c exp_1d exp_1b       | 2.698              | 152.150                                    |
| exp_1b exp_1d exp_1c exp_1a       | 2.691              | 152.439                                    | exp_1b exp_1c exp_1a exp_1d       | 2.805              | 157.576                                    | exp_1b exp_1d exp_1c exp_1a       | 2.715              | 153.738                                    |
| exp_1a exp_1d exp_1c exp_1b       | 2.711              | 154.315                                    | exp_1c exp_1a exp_1d exp_1b       | 2.812              | 158.219                                    | exp_1b exp_1d exp_1a exp_1c       | 2.729              | 155.047                                    |
| exp_1b exp_1d exp_1a exp_1c       | 2.721              | 155.253                                    | exp_1b exp_1d exp_1a exp_1c       | 2.856              | 162.259                                    | exp_1a exp_1d exp_1c exp_1b       | 2.734              | 155.514                                    |
| exp_1d exp_1c exp_1b exp_1a       | 3.205              | 200.657                                    | exp_1d exp_1c exp_1b exp_1a       | 3.410              | 213.131                                    | exp_1d exp_1c exp_1b exp_1a       | 3.203              | 199.346                                    |
| exp_1c exp_1d exp_1b exp_1a       | 3.236              | 203.565                                    | exp_1c exp_1d exp_1b exp_1a       | 3.433              | 215.243                                    | exp_1c exp_1d exp_1b exp_1a       | 3.235              | 202.336                                    |
| exp_1d exp_1c exp_1a exp_1b       | 3.289              | 208.537                                    | exp_1d exp_1c exp_1a exp_1b       | 3.496              | 221.028                                    | exp_1d exp_1c exp_1a exp_1b       | 3.290              | 207.477                                    |
| exp_1c exp_1d exp_1a exp_1b       | 3.324              | 211.820                                    | exp_1c exp_1d exp_1a exp_1b       | 3.528              | 223.967                                    | exp_1c exp_1d exp_1a exp_1b       | 3.328              | 211.028                                    |

<sup>a</sup>considering calc\_1a calc\_1b calc\_1c and calc\_1d starting fixed sequence related to the calculated sets of data

**Table S14.** <sup>13</sup>C experimental related to exp\_2a set of data and calculated NMR chemical shifts (MPW1PW91/6-31g(d,p) level of theory) related to calc\_2a, calc\_2b, calc\_2c, calc\_2d sets of data, with <sup>a</sup>|\Delta\delta|(<sup>13</sup>C) and <sup>b</sup>MAE values.

| Position         | $\delta_{\text{exp}}(^{13}\text{C}), \text{ppm}$ |         |         |         |         | $\delta_{\text{calc}}(^{13}\text{C}), \text{ppm}$ |         |         |         | $ \Delta\delta  (^{13}\text{C}), \text{ppm}^{\text{a}}$ |         |         |         |
|------------------|--------------------------------------------------|---------|---------|---------|---------|---------------------------------------------------|---------|---------|---------|---------------------------------------------------------|---------|---------|---------|
|                  | exp_2a                                           | calc_2a | calc_2b | calc_2c | calc_2d | calc_2a                                           | calc_2b | calc_2c | calc_2d | calc_2a                                                 | calc_2b | calc_2c | calc_2d |
| 1                | 69.2                                             | 73.07   | 70.28   | 71.09   | 75.87   | 3.87                                              | 1.08    | 1.89    | 6.67    |                                                         |         |         |         |
| 2                | 40                                               | 33.70   | 41.02   | 43.23   | 41.97   | 6.30                                              | 1.02    | 3.23    | 1.97    |                                                         |         |         |         |
| 3                | 62.8                                             | 62.50   | 65.76   | 58.40   | 61.16   | 0.30                                              | 2.96    | 4.40    | 1.64    |                                                         |         |         |         |
| 5                | 60.9                                             | 63.02   | 71.07   | 62.53   | 67.53   | 2.12                                              | 10.17   | 1.63    | 6.63    |                                                         |         |         |         |
| 6                | 78.4                                             | 74.87   | 76.99   | 81.77   | 72.30   | 3.53                                              | 1.41    | 3.37    | 6.10    |                                                         |         |         |         |
| 7                | 71.8                                             | 68.76   | 71.10   | 70.07   | 71.28   | 3.04                                              | 0.70    | 1.73    | 0.52    |                                                         |         |         |         |
| 7a               | 75.6                                             | 74.03   | 75.46   | 68.45   | 66.39   | 1.57                                              | 0.14    | 7.15    | 9.21    |                                                         |         |         |         |
| 8                | 62.4                                             | 60.06   | 64.71   | 62.69   | 65.55   | 2.34                                              | 2.31    | 0.29    | 3.15    |                                                         |         |         |         |
| 9                | 42.8                                             | 44.23   | 45.18   | 46.38   | 39.33   | 1.43                                              | 2.38    | 3.58    | 3.47    |                                                         |         |         |         |
| 11               | 173.9                                            | 163.51  | 164.23  | 165.97  | 164.45  | 10.39                                             | 9.67    | 7.93    | 9.45    |                                                         |         |         |         |
| 12               | 22.6                                             | 23.07   | 23.00   | 23.35   | 22.78   | 0.47                                              | 0.40    | 0.75    | 0.18    |                                                         |         |         |         |
| MAE <sup>b</sup> |                                                  |         |         |         |         | 3.21                                              | 2.93    | 3.27    | 4.45    |                                                         |         |         |         |

<sup>a</sup>  $|\Delta\delta|(^{13}\text{C}) = |\delta_{\text{exp}} - \delta_{\text{calc}}| (^{13}\text{C}), \text{ppm}$ : absolute differences for experimental versus calculated <sup>13</sup>C NMR chemical shifts

<sup>b</sup>  $\text{MAE} = \Sigma[|(\delta_{\text{exp}} - \delta_{\text{calc}})|]/n$ , summation through n of the absolute error values (difference of the absolute values between corresponding experimental and <sup>13</sup>C chemical shifts), normalized to the number of the chemical shifts

**Table S15.**  $^{13}\text{C}$  experimental related to exp\_2b set of data and calculated NMR chemical shifts (MPW1PW91/6-31g(d,p) level of theory) related to calc\_2a, calc\_2b, calc\_2c, calc\_2d sets of data, with <sup>a</sup> $|\Delta\delta|(^{13}\text{C})$  and <sup>b</sup>MAE values.

| Position         | $\delta_{\text{exp}}(^{13}\text{C}), \text{ppm}$ |         | $\delta_{\text{calc}}(^{13}\text{C}), \text{ppm}$ |         |         |         | $ \Delta\delta (^{13}\text{C}), \text{ppm}^{\text{a}}$ |         |         |  |
|------------------|--------------------------------------------------|---------|---------------------------------------------------|---------|---------|---------|--------------------------------------------------------|---------|---------|--|
|                  | exp_2b                                           | calc_2a | calc_2b                                           | calc_1c | calc_2d | calc_2a | calc_2b                                                | calc_2c | calc_2d |  |
| 1                | 70.7                                             | 73.07   | 70.28                                             | 71.09   | 75.87   | 2.37    | 0.42                                                   | 0.39    | 5.17    |  |
| 2                | 39                                               | 33.70   | 41.02                                             | 43.23   | 41.97   | 5.30    | 2.02                                                   | 4.23    | 2.97    |  |
| 3                | 69.7                                             | 62.50   | 65.76                                             | 58.40   | 61.16   | 7.20    | 3.94                                                   | 11.30   | 8.54    |  |
| 5                | 71.4                                             | 63.02   | 71.07                                             | 62.53   | 67.53   | 8.38    | 0.33                                                   | 8.87    | 3.87    |  |
| 6                | 76.9                                             | 74.87   | 76.99                                             | 81.77   | 72.30   | 2.03    | 0.09                                                   | 4.87    | 4.60    |  |
| 7                | 72.4                                             | 68.76   | 71.10                                             | 70.07   | 71.28   | 3.64    | 1.30                                                   | 2.33    | 1.12    |  |
| 7a               | 76.5                                             | 74.03   | 75.46                                             | 68.45   | 66.39   | 2.47    | 1.04                                                   | 8.05    | 10.11   |  |
| 8                | 65.9                                             | 60.06   | 64.71                                             | 62.69   | 65.55   | 5.84    | 1.19                                                   | 3.21    | 0.35    |  |
| 9                | 42.3                                             | 44.23   | 45.18                                             | 46.38   | 39.33   | 1.93    | 2.88                                                   | 4.08    | 2.97    |  |
| 11               | 173.9                                            | 163.51  | 164.23                                            | 165.97  | 164.45  | 10.39   | 9.67                                                   | 7.93    | 9.45    |  |
| 12               | 22.6                                             | 23.07   | 23.00                                             | 23.35   | 22.78   | 0.47    | 0.40                                                   | 0.75    | 0.18    |  |
| MAE <sup>b</sup> |                                                  |         |                                                   |         |         | 4.55    | 2.12                                                   | 5.09    | 4.48    |  |

<sup>a</sup>  $|\Delta\delta|(^{13}\text{C}) = |\delta_{\text{exp}} - \delta_{\text{calc}}|(^{13}\text{C}), \text{ppm}$ : absolute differences for experimental versus calculated  $^{13}\text{C}$  NMR chemical shifts

<sup>b</sup>  $\text{MAE} = \Sigma[|(\delta_{\text{exp}} - \delta_{\text{calcd}})|]/n$ , summation through n of the absolute error values (difference of the absolute values between corresponding experimental and  $^{13}\text{C}$  chemical shifts), normalized to the number of the chemical shifts

**Table S16.**  $^{13}\text{C}$  experimental related to exp\_2c set of data and calculated NMR chemical shifts (MPW1PW91/6-31g(d,p) level of theory) related to calc\_2a, calc\_2b, calc\_2c, calc\_2d sets of data, with  $^a|\Delta\delta|(^{13}\text{C})$  and  $^b\text{MAE}$  values.

| Position         | $\delta_{\text{exp}}(^{13}\text{C}), \text{ppm}$ |         |         |         |         | $\delta_{\text{calc}}(^{13}\text{C}), \text{ppm}$ |         |         |         | $ \Delta\delta (^{13}\text{C}), \text{ppm}^a$ |         |         |         |
|------------------|--------------------------------------------------|---------|---------|---------|---------|---------------------------------------------------|---------|---------|---------|-----------------------------------------------|---------|---------|---------|
|                  | exp_2c                                           | calc_2a | calc_2b | calc_2c | calc_2d | calc_2a                                           | calc_2b | calc_2c | calc_2d | calc_2a                                       | calc_2b | calc_2c | calc_2d |
| 1                | 73.7                                             | 73.07   | 70.28   | 71.09   | 75.87   | 0.63                                              | 3.42    | 2.61    | 2.17    |                                               |         |         |         |
| 2                | 43.6                                             | 33.70   | 41.02   | 43.23   | 41.97   | 9.90                                              | 2.58    | 0.37    | 1.63    |                                               |         |         |         |
| 3                | 61.6                                             | 62.50   | 65.76   | 58.40   | 61.16   | 0.90                                              | 4.16    | 3.20    | 0.44    |                                               |         |         |         |
| 5                | 62.5                                             | 63.02   | 71.07   | 62.53   | 67.53   | 0.52                                              | 8.57    | 0.03    | 5.03    |                                               |         |         |         |
| 6                | 78.7                                             | 74.87   | 76.99   | 81.77   | 72.30   | 3.83                                              | 1.71    | 3.07    | 6.40    |                                               |         |         |         |
| 7                | 68.9                                             | 68.76   | 71.10   | 70.07   | 71.28   | 0.14                                              | 2.20    | 1.17    | 2.38    |                                               |         |         |         |
| 7a               | 73.9                                             | 74.03   | 75.46   | 68.45   | 66.39   | 0.13                                              | 1.56    | 5.45    | 7.51    |                                               |         |         |         |
| 8                | 63.3                                             | 60.06   | 64.71   | 62.69   | 65.55   | 3.24                                              | 1.41    | 0.61    | 2.25    |                                               |         |         |         |
| 9                | 40.8                                             | 44.23   | 45.18   | 46.38   | 39.33   | 3.43                                              | 4.38    | 5.58    | 1.47    |                                               |         |         |         |
| 11               | 173.7                                            | 163.51  | 164.23  | 165.97  | 164.45  | 10.19                                             | 9.47    | 7.73    | 9.25    |                                               |         |         |         |
| 12               | 22.6                                             | 23.07   | 23.00   | 23.35   | 22.78   | 0.47                                              | 0.40    | 0.75    | 0.18    |                                               |         |         |         |
| MAE <sup>b</sup> |                                                  |         |         |         |         | 3.03                                              | 3.62    | 2.78    | 3.52    |                                               |         |         |         |

<sup>a</sup>  $|\Delta\delta|(^{13}\text{C}) = |\delta_{\text{exp}} - \delta_{\text{calc}}|(^{13}\text{C}), \text{ppm}$ : absolute differences for experimental versus calculated  $^{13}\text{C}$  NMR chemical shifts

<sup>b</sup>  $\text{MAE} = \Sigma[|(\delta_{\text{exp}} - \delta_{\text{calcd}})|]/n$ , summation through n of the absolute error values (difference of the absolute values between corresponding experimental and  $^{13}\text{C}$  chemical shifts), normalized to the number of the chemical shifts

**Table S17.**  $^{13}\text{C}$  experimental related to exp\_2d set of data and calculated NMR chemical shifts (MPW1PW91/6-31g(d,p) level of theory) related to calc\_2a, calc\_2b, calc\_2c, calc\_2d sets of data, with  $^a|\Delta\delta|(^{13}\text{C})$  and  $^b\text{MAE}$  values..

| Position         | $\delta_{\text{exp}}(^{13}\text{C}), \text{ppm}$ |         |         |         |         | $\delta_{\text{calc}}(^{13}\text{C}), \text{ppm}$ |         |         |         | $ \Delta\delta  (^{13}\text{C}), \text{ppm}^a$ |         |         |         |
|------------------|--------------------------------------------------|---------|---------|---------|---------|---------------------------------------------------|---------|---------|---------|------------------------------------------------|---------|---------|---------|
|                  | exp_2d                                           | calc_2a | calc_2b | calc_2c | calc_2d | calc_2a                                           | calc_2b | calc_2c | calc_2d | calc_2a                                        | calc_2b | calc_2c | calc_2d |
| 1                | 76.6                                             | 73.07   | 70.28   | 71.09   | 75.87   | 3.53                                              | 6.32    | 5.51    | 0.73    |                                                |         |         |         |
| 2                | 39.8                                             | 33.70   | 41.02   | 43.23   | 41.97   | 6.10                                              | 1.22    | 3.43    | 2.17    |                                                |         |         |         |
| 3                | 66.2                                             | 62.50   | 65.76   | 58.40   | 61.16   | 3.70                                              | 0.44    | 7.80    | 5.04    |                                                |         |         |         |
| 5                | 71.5                                             | 63.02   | 71.07   | 62.53   | 67.53   | 8.48                                              | 0.43    | 8.97    | 3.97    |                                                |         |         |         |
| 6                | 74.1                                             | 74.87   | 76.99   | 81.77   | 72.30   | 0.77                                              | 2.89    | 7.67    | 1.80    |                                                |         |         |         |
| 7                | 73.9                                             | 68.76   | 71.10   | 70.07   | 71.28   | 5.14                                              | 2.80    | 3.83    | 2.62    |                                                |         |         |         |
| 7a               | 70.8                                             | 74.03   | 75.46   | 68.45   | 66.39   | 3.23                                              | 4.66    | 2.35    | 4.41    |                                                |         |         |         |
| 8                | 68.7                                             | 60.06   | 64.71   | 62.69   | 65.55   | 8.64                                              | 3.99    | 6.01    | 3.15    |                                                |         |         |         |
| 9                | 42.8                                             | 44.23   | 45.18   | 46.38   | 39.33   | 1.43                                              | 2.38    | 3.58    | 3.47    |                                                |         |         |         |
| 11               | 173.7                                            | 163.51  | 164.23  | 165.97  | 164.45  | 10.19                                             | 9.47    | 7.73    | 9.25    |                                                |         |         |         |
| 12               | 22.6                                             | 23.07   | 23.00   | 23.35   | 22.78   | 0.47                                              | 0.40    | 0.75    | 0.18    |                                                |         |         |         |
| MAE <sup>b</sup> |                                                  |         |         |         |         | 4.70                                              | 3.18    | 5.24    | 3.34    |                                                |         |         |         |

<sup>a</sup>  $|\Delta\delta|(^{13}\text{C}) = |\delta_{\text{exp}} - \delta_{\text{calc}}| (^{13}\text{C}), \text{ppm}$ : absolute differences for experimental versus calculated  $^{13}\text{C}$  NMR chemical shifts

<sup>b</sup>  $\text{MAE} = \Sigma[|(\delta_{\text{exp}} - \delta_{\text{calcd}})|]/n$ , summation through n of the absolute error values (difference of the absolute values between corresponding experimental and  $^{13}\text{C}$  chemical shifts), normalized to the number of the chemical shifts

**Table S18.**  $^{13}\text{C}$  experimental related to exp\_2a set of data and calculated NMR chemical shifts (MPW1PW91/6-311+g(d,p) level of theory) related to calc\_2a, calc\_2b, calc\_2c, calc\_2d sets of data, with  $^a|\Delta\delta|(^{13}\text{C})$  and  $^b\text{MAE}$  values.

| Position         | $\delta_{\text{exp}}(^{13}\text{C}), \text{ppm}$ |         |         |         |         | $\delta_{\text{calc}}(^{13}\text{C}), \text{ppm}$ |         |         |         | $ \Delta\delta (^{13}\text{C}), \text{ppm}^a$ |         |         |         |
|------------------|--------------------------------------------------|---------|---------|---------|---------|---------------------------------------------------|---------|---------|---------|-----------------------------------------------|---------|---------|---------|
|                  | exp_2a                                           | calc_2a | calc_2b | calc_2c | calc_2d | calc_2a                                           | calc_2b | calc_2c | calc_2d | calc_2a                                       | calc_2b | calc_2c | calc_2d |
| 1                | 69.2                                             | 76.05   | 72.57   | 75.11   | 79.20   | 6.85                                              | 3.37    | 5.91    | 10.00   |                                               |         |         |         |
| 2                | 40                                               | 35.23   | 42.70   | 45.60   | 42.85   | 4.77                                              | 2.70    | 5.60    | 2.85    |                                               |         |         |         |
| 3                | 62.8                                             | 65.72   | 65.60   | 62.44   | 65.47   | 2.92                                              | 2.80    | 0.36    | 2.67    |                                               |         |         |         |
| 5                | 60.9                                             | 66.48   | 71.60   | 66.56   | 71.66   | 5.58                                              | 10.70   | 5.66    | 10.76   |                                               |         |         |         |
| 6                | 78.4                                             | 78.14   | 78.24   | 86.17   | 76.19   | 0.26                                              | 0.16    | 7.77    | 2.21    |                                               |         |         |         |
| 7                | 71.8                                             | 71.51   | 72.59   | 74.34   | 75.86   | 0.29                                              | 0.79    | 2.54    | 4.06    |                                               |         |         |         |
| 7a               | 75.6                                             | 80.71   | 76.59   | 73.28   | 70.73   | 5.11                                              | 0.99    | 2.32    | 4.87    |                                               |         |         |         |
| 8                | 62.4                                             | 64.21   | 65.42   | 66.53   | 68.98   | 1.81                                              | 3.02    | 4.13    | 6.58    |                                               |         |         |         |
| 9                | 42.8                                             | 44.91   | 42.35   | 48.05   | 41.42   | 2.11                                              | 0.45    | 5.25    | 1.38    |                                               |         |         |         |
| 11               | 173.9                                            | 177.01  | 177.14  | 178.89  | 177.26  | 3.11                                              | 3.24    | 4.99    | 3.36    |                                               |         |         |         |
| 12               | 22.6                                             | 24.52   | 24.20   | 25.08   | 24.29   | 1.92                                              | 1.60    | 2.48    | 1.69    |                                               |         |         |         |
| MAE <sup>b</sup> |                                                  |         |         |         |         | 3.16                                              | 2.71    | 4.27    | 4.59    |                                               |         |         |         |

<sup>a</sup>  $|\Delta\delta|(^{13}\text{C}) = |\delta_{\text{exp}} - \delta_{\text{calc}}|(^{13}\text{C}), \text{ppm}$ : absolute differences for experimental versus calculated  $^{13}\text{C}$  NMR chemical shifts

<sup>b</sup>  $\text{MAE} = \Sigma[|(\delta_{\text{exp}} - \delta_{\text{calcd}})|]/n$ , summation through n of the absolute error values (difference of the absolute values between corresponding experimental and  $^{13}\text{C}$  chemical shifts), normalized to the number of the chemical shifts



**Table S19.**  $^{13}\text{C}$  experimental related to exp\_2b set of data and calculated NMR chemical shifts (MPW1PW91/6-311+g(d,p) level of theory) related to calc\_2a, calc\_2b, calc\_2c, calc\_2d sets of data, with  $^a|\Delta\delta|(^{13}\text{C})$  and  $^b\text{MAE}$  values.

| Position         | $\delta_{\text{exp}}(^{13}\text{C}), \text{ppm}$ |         |         |         |         | $\delta_{\text{calc}}(^{13}\text{C}), \text{ppm}$ |         |         |         | $ \Delta\delta (^{13}\text{C}), \text{ppm}^a$ |         |         |         |
|------------------|--------------------------------------------------|---------|---------|---------|---------|---------------------------------------------------|---------|---------|---------|-----------------------------------------------|---------|---------|---------|
|                  | exp_2b                                           | calc_2a | calc_2b | calc_2c | calc_2d | calc_2a                                           | calc_2b | calc_2c | calc_2d | calc_2a                                       | calc_2b | calc_2c | calc_2d |
| 1                | 70.7                                             | 76.05   | 72.57   | 75.11   | 79.20   | 5.35                                              | 1.87    | 4.41    | 8.50    |                                               |         |         |         |
| 2                | 39                                               | 35.23   | 42.70   | 45.60   | 42.85   | 3.77                                              | 3.70    | 6.60    | 3.85    |                                               |         |         |         |
| 3                | 69.7                                             | 65.72   | 65.60   | 62.44   | 65.47   | 3.98                                              | 4.10    | 7.26    | 4.23    |                                               |         |         |         |
| 5                | 71.4                                             | 66.48   | 71.60   | 66.56   | 71.66   | 4.92                                              | 0.20    | 4.84    | 0.26    |                                               |         |         |         |
| 6                | 76.9                                             | 78.14   | 78.24   | 86.17   | 76.19   | 1.24                                              | 1.34    | 9.27    | 0.71    |                                               |         |         |         |
| 7                | 72.4                                             | 71.51   | 72.59   | 74.34   | 75.86   | 0.89                                              | 0.19    | 1.94    | 3.46    |                                               |         |         |         |
| 7a               | 76.5                                             | 80.71   | 76.59   | 73.28   | 70.73   | 4.21                                              | 0.09    | 3.22    | 5.77    |                                               |         |         |         |
| 8                | 65.9                                             | 64.21   | 65.42   | 66.53   | 68.98   | 1.69                                              | 0.48    | 0.63    | 3.08    |                                               |         |         |         |
| 9                | 42.3                                             | 44.91   | 42.35   | 48.05   | 41.42   | 2.61                                              | 0.05    | 5.75    | 0.88    |                                               |         |         |         |
| 11               | 173.9                                            | 177.01  | 177.14  | 178.89  | 177.26  | 3.11                                              | 3.24    | 4.99    | 3.36    |                                               |         |         |         |
| 12               | 22.6                                             | 24.52   | 24.20   | 25.08   | 24.29   | 1.92                                              | 1.60    | 2.48    | 1.69    |                                               |         |         |         |
| MAE <sup>b</sup> |                                                  |         |         |         |         | 3.06                                              | 1.53    | 4.67    | 3.25    |                                               |         |         |         |

<sup>a</sup>  $|\Delta\delta|(^{13}\text{C}) = |\delta_{\text{exp}} - \delta_{\text{calc}}|(^{13}\text{C}), \text{ppm}$ : absolute differences for experimental versus calculated  $^{13}\text{C}$  NMR chemical shifts

<sup>b</sup>  $\text{MAE} = \Sigma[|(\delta_{\text{exp}} - \delta_{\text{calcd}})|]/n$ , summation through n of the absolute error values (difference of the absolute values between corresponding experimental and  $^{13}\text{C}$  chemical shifts), normalized to the number of the chemical shifts

**Table S20.**  $^{13}\text{C}$  experimental related to exp\_2c set of data and calculated NMR chemical shifts (MPW1PW91/6-311+g(d,p) level of theory) related to calc\_2a, calc\_2b, calc\_2c, calc\_2d sets of data, with  $^a|\Delta\delta|(^{13}\text{C})$  and  $^b\text{MAE}$  values.

| Position         | $\delta_{\text{exp}}(^{13}\text{C}), \text{ppm}$ |         |         |         |         | $\delta_{\text{calc}}(^{13}\text{C}), \text{ppm}$ |         |         |         | $ \Delta\delta (^{13}\text{C}), \text{ppm}^a$ |         |         |         |
|------------------|--------------------------------------------------|---------|---------|---------|---------|---------------------------------------------------|---------|---------|---------|-----------------------------------------------|---------|---------|---------|
|                  | exp_2c                                           | calc_2a | calc_2b | calc_2c | calc_2d | calc_2a                                           | calc_2b | calc_2c | calc_2d | calc_2a                                       | calc_2b | calc_2c | calc_2d |
| 1                | 73.7                                             | 76.05   | 72.57   | 75.11   | 79.20   | 2.35                                              | 1.13    | 1.41    | 5.50    |                                               |         |         |         |
| 2                | 43.6                                             | 35.23   | 42.70   | 45.60   | 42.85   | 8.37                                              | 0.90    | 2.00    | 0.75    |                                               |         |         |         |
| 3                | 61.6                                             | 65.72   | 65.60   | 62.44   | 65.47   | 4.12                                              | 4.00    | 0.84    | 3.87    |                                               |         |         |         |
| 5                | 62.5                                             | 66.48   | 71.60   | 66.56   | 71.66   | 3.98                                              | 9.10    | 4.06    | 9.16    |                                               |         |         |         |
| 6                | 78.7                                             | 78.14   | 78.24   | 86.17   | 76.19   | 0.56                                              | 0.46    | 7.47    | 2.51    |                                               |         |         |         |
| 7                | 68.9                                             | 71.51   | 72.59   | 74.34   | 75.86   | 2.61                                              | 3.69    | 5.44    | 6.96    |                                               |         |         |         |
| 7a               | 73.9                                             | 80.71   | 76.59   | 73.28   | 70.73   | 6.81                                              | 2.69    | 0.62    | 3.17    |                                               |         |         |         |
| 8                | 63.3                                             | 64.21   | 65.42   | 66.53   | 68.98   | 0.91                                              | 2.12    | 3.23    | 5.68    |                                               |         |         |         |
| 9                | 40.8                                             | 44.91   | 42.35   | 48.05   | 41.42   | 4.11                                              | 1.55    | 7.25    | 0.62    |                                               |         |         |         |
| 11               | 173.7                                            | 177.01  | 177.14  | 178.89  | 177.26  | 3.31                                              | 3.44    | 5.19    | 3.56    |                                               |         |         |         |
| 12               | 22.6                                             | 24.52   | 24.20   | 25.08   | 24.29   | 1.92                                              | 1.60    | 2.48    | 1.69    |                                               |         |         |         |
| MAE <sup>b</sup> |                                                  |         |         |         |         | 3.55                                              | 2.79    | 3.64    | 3.95    |                                               |         |         |         |

<sup>a</sup>  $|\Delta\delta|(^{13}\text{C}) = |\delta_{\text{exp}} - \delta_{\text{calc}}|(^{13}\text{C}), \text{ppm}$ : absolute differences for experimental versus calculated  $^{13}\text{C}$  NMR chemical shifts

<sup>b</sup>  $\text{MAE} = \Sigma[|\delta_{\text{exp}} - \delta_{\text{calcd}}|]/n$ , summation through n of the absolute error values (difference of the absolute values between corresponding experimental and  $^{13}\text{C}$  chemical shifts), normalized to the number of the chemical shifts

**Table S21.**  $^{13}\text{C}$  experimental related to exp\_2d set of data and calculated NMR chemical shifts (MPW1PW91/6-311+g(d,p) level of theory) related to calc\_2a, calc\_2b, calc\_2c, calc\_2d sets of data, with  $^a|\Delta\delta|(^{13}\text{C})$  and  $^b\text{MAE}$  values.

| Position         | $\delta_{\text{exp}}(^{13}\text{C}), \text{ppm}$ |         |         |         |         | $\delta_{\text{calc}}(^{13}\text{C}), \text{ppm}$ |         |         |         | $ \Delta\delta  (^{13}\text{C}), \text{ppm}^a$ |         |         |         |
|------------------|--------------------------------------------------|---------|---------|---------|---------|---------------------------------------------------|---------|---------|---------|------------------------------------------------|---------|---------|---------|
|                  | exp_2d                                           | calc_2a | calc_2b | calc_2c | calc_2d | calc_2a                                           | calc_2b | calc_2c | calc_2d | calc_2a                                        | calc_2b | calc_2c | calc_2d |
| 1                | 76.6                                             | 76.05   | 72.57   | 75.11   | 79.20   | 0.55                                              | 4.03    | 1.49    | 2.60    |                                                |         |         |         |
| 2                | 39.8                                             | 35.23   | 42.70   | 45.60   | 42.85   | 4.57                                              | 2.90    | 5.80    | 3.05    |                                                |         |         |         |
| 3                | 66.2                                             | 65.72   | 65.60   | 62.44   | 65.47   | 0.48                                              | 0.60    | 3.76    | 0.73    |                                                |         |         |         |
| 5                | 71.5                                             | 66.48   | 71.60   | 66.56   | 71.66   | 5.02                                              | 0.10    | 4.94    | 0.16    |                                                |         |         |         |
| 6                | 74.1                                             | 78.14   | 78.24   | 86.17   | 76.19   | 4.04                                              | 4.14    | 12.07   | 2.09    |                                                |         |         |         |
| 7                | 73.9                                             | 71.51   | 72.59   | 74.34   | 75.86   | 2.39                                              | 1.31    | 0.44    | 1.96    |                                                |         |         |         |
| 7a               | 70.8                                             | 80.71   | 76.59   | 73.28   | 70.73   | 9.91                                              | 5.79    | 2.48    | 0.07    |                                                |         |         |         |
| 8                | 68.7                                             | 64.21   | 65.42   | 66.53   | 68.98   | 4.49                                              | 3.28    | 2.17    | 0.28    |                                                |         |         |         |
| 9                | 42.8                                             | 44.91   | 42.35   | 48.05   | 41.42   | 2.11                                              | 0.45    | 5.25    | 1.38    |                                                |         |         |         |
| 11               | 173.7                                            | 177.01  | 177.14  | 178.89  | 177.26  | 3.31                                              | 3.44    | 5.19    | 3.56    |                                                |         |         |         |
| 12               | 22.6                                             | 24.52   | 24.20   | 25.08   | 24.29   | 1.92                                              | 1.60    | 2.48    | 1.69    |                                                |         |         |         |
| MAE <sup>b</sup> |                                                  |         |         |         |         | 3.53                                              | 2.51    | 4.19    | 1.60    |                                                |         |         |         |

<sup>a</sup>  $|\Delta\delta|(^{13}\text{C}) = |\delta_{\text{exp}} - \delta_{\text{calc}}| (^{13}\text{C}), \text{ppm}$ : absolute differences for experimental versus calculated  $^{13}\text{C}$  NMR chemical shifts

<sup>b</sup>  $\text{MAE} = \Sigma[|(\delta_{\text{exp}} - \delta_{\text{calcd}})|]/n$ , summation through n of the absolute error values (difference of the absolute values between corresponding experimental and  $^{13}\text{C}$  chemical shifts), normalized to the number of the chemical shifts

**Table S22.**  $^{13}\text{C}$  experimental related to exp\_2a set of data and calculated NMR chemical shifts (B97-2/cc-pVTZ level of theory) related to calc\_2a, calc\_2b, calc\_2c, calc\_2d sets of data, with  $^a|\Delta\delta|(^{13}\text{C})$  and  $^b\text{MAE}$  values.

| Position         | $\delta_{\text{exp}}(^{13}\text{C}), \text{ppm}$ |         | $\delta_{\text{calc}}(^{13}\text{C}), \text{ppm}$ |         |         | $ \Delta\delta (^{13}\text{C}), \text{ppm}^a$ |         |         |         |
|------------------|--------------------------------------------------|---------|---------------------------------------------------|---------|---------|-----------------------------------------------|---------|---------|---------|
|                  | exp_2a                                           | calc_2a | calc_2b                                           | calc_2c | calc_2d | calc_2a                                       | calc_2b | calc_2c | calc_2d |
| 1                | 69.2                                             | 77.10   | 73.18                                             | 75.81   | 78.99   | 7.90                                          | 3.98    | 6.61    | 9.79    |
| 2                | 40                                               | 35.66   | 43.07                                             | 45.53   | 41.93   | 4.34                                          | 3.07    | 5.53    | 1.93    |
| 3                | 62.8                                             | 66.73   | 67.70                                             | 62.97   | 67.15   | 3.93                                          | 4.90    | 0.17    | 4.35    |
| 5                | 60.9                                             | 67.55   | 72.90                                             | 67.07   | 72.76   | 6.65                                          | 12.00   | 6.17    | 11.86   |
| 6                | 78.4                                             | 79.39   | 80.47                                             | 86.37   | 78.04   | 0.99                                          | 2.07    | 7.97    | 0.37    |
| 7                | 71.8                                             | 72.86   | 73.56                                             | 75.09   | 76.47   | 1.06                                          | 1.76    | 3.29    | 4.67    |
| 7a               | 75.6                                             | 78.75   | 77.54                                             | 73.28   | 71.30   | 3.15                                          | 1.94    | 2.32    | 4.30    |
| 8                | 62.4                                             | 64.06   | 65.84                                             | 67.08   | 69.30   | 1.66                                          | 3.44    | 4.68    | 6.90    |
| 9                | 42.8                                             | 46.80   | 44.15                                             | 48.68   | 42.94   | 4.00                                          | 1.35    | 5.88    | 0.14    |
| 11               | 173.9                                            | 173.34  | 174.13                                            | 175.50  | 174.14  | 0.56                                          | 0.23    | 1.60    | 0.24    |
| 12               | 22.6                                             | 24.09   | 23.94                                             | 24.38   | 23.86   | 1.49                                          | 1.34    | 1.78    | 1.26    |
| MAE <sup>b</sup> |                                                  |         |                                                   |         |         | 3.25                                          | 3.28    | 4.18    | 4.16    |

<sup>a</sup>  $|\Delta\delta|(^{13}\text{C}) = |\delta_{\text{exp}} - \delta_{\text{calc}}|(^{13}\text{C}), \text{ppm}$ : absolute differences for experimental versus calculated  $^{13}\text{C}$  NMR chemical shifts

<sup>b</sup>  $\text{MAE} = \Sigma[|(\delta_{\text{exp}} - \delta_{\text{calcd}})|]/n$ , summation through n of the absolute error values (difference of the absolute values between corresponding experimental and  $^{13}\text{C}$  chemical shifts), normalized to the number of the chemical shifts

**Table S23.**  $^{13}\text{C}$  experimental related to exp\_2b set of data and calculated NMR chemical shifts (B97-2/cc-pVTZ level of theory) related to calc\_2a, calc\_2b, calc\_2c, calc\_2d sets of data, with <sup>a</sup> $|\Delta\delta|(^{13}\text{C})$  and <sup>b</sup>MAE values.

| Position         | $\delta_{\text{exp}}(^{13}\text{C}), \text{ppm}$ |         | $\delta_{\text{calc}}(^{13}\text{C}), \text{ppm}$ |         |         | $ \Delta\delta (^{13}\text{C}), \text{ppm}^{\text{a}}$ |         |         |         |
|------------------|--------------------------------------------------|---------|---------------------------------------------------|---------|---------|--------------------------------------------------------|---------|---------|---------|
|                  | exp_2b                                           | calc_2a | calc_2b                                           | calc_2c | calc_2d | calc_2a                                                | calc_2b | calc_2c | calc_2d |
| 1                | 70.7                                             | 77.10   | 73.18                                             | 75.81   | 78.99   | 6.40                                                   | 2.48    | 5.11    | 8.29    |
| 2                | 39                                               | 35.66   | 43.07                                             | 45.53   | 41.93   | 3.34                                                   | 4.07    | 6.53    | 2.93    |
| 3                | 69.7                                             | 66.73   | 67.70                                             | 62.97   | 67.15   | 2.97                                                   | 2.00    | 6.73    | 2.55    |
| 5                | 71.4                                             | 67.55   | 72.90                                             | 67.07   | 72.76   | 3.85                                                   | 1.50    | 4.33    | 1.36    |
| 6                | 76.9                                             | 79.39   | 80.47                                             | 86.37   | 78.04   | 2.49                                                   | 3.57    | 9.47    | 1.13    |
| 7                | 72.4                                             | 72.86   | 73.56                                             | 75.09   | 76.47   | 0.46                                                   | 1.16    | 2.69    | 4.07    |
| 7a               | 76.5                                             | 78.75   | 77.54                                             | 73.28   | 71.30   | 2.25                                                   | 1.04    | 3.22    | 5.20    |
| 8                | 65.9                                             | 64.06   | 65.84                                             | 67.08   | 69.30   | 1.84                                                   | 0.06    | 1.18    | 3.40    |
| 9                | 42.3                                             | 46.80   | 44.15                                             | 48.68   | 42.94   | 4.50                                                   | 1.85    | 6.38    | 0.64    |
| 11               | 173.9                                            | 173.34  | 174.13                                            | 175.50  | 174.14  | 0.56                                                   | 0.23    | 1.60    | 0.24    |
| 12               | 22.6                                             | 24.09   | 23.94                                             | 24.38   | 23.86   | 1.49                                                   | 1.34    | 1.78    | 1.26    |
| MAE <sup>b</sup> |                                                  |         |                                                   |         |         | 2.74                                                   | 1.75    | 4.46    | 2.82    |

<sup>a</sup>  $|\Delta\delta|(^{13}\text{C}) = |\delta_{\text{exp}} - \delta_{\text{calc}}|(^{13}\text{C}), \text{ppm}$ : absolute differences for experimental versus calculated  $^{13}\text{C}$  NMR chemical shifts

<sup>b</sup>  $\text{MAE} = \Sigma[|(\delta_{\text{exp}} - \delta_{\text{calcd}})|]/n$ , summation through n of the absolute error values (difference of the absolute values between corresponding experimental and  $^{13}\text{C}$  chemical shifts), normalized to the number of the chemical shifts

**Table S24.**  $^{13}\text{C}$  experimental related to exp\_2c set of data and calculated NMR chemical shifts (B97-2/cc-pVTZ level of theory) related to calc\_2a, calc\_2b, calc\_2c, calc\_2d sets of data, with  $^a|\Delta\delta|(^{13}\text{C})$  and  $^b\text{MAE}$  values.

| Position         | $\delta_{\text{exp}}(^{13}\text{C}), \text{ppm}$ |         |         |         |         | $\delta_{\text{calc}}(^{13}\text{C}), \text{ppm}$ |         |         |         | $ \Delta\delta (^{13}\text{C}), \text{ppm}^a$ |         |         |         |
|------------------|--------------------------------------------------|---------|---------|---------|---------|---------------------------------------------------|---------|---------|---------|-----------------------------------------------|---------|---------|---------|
|                  | exp_2c                                           | calc_2a | calc_2b | calc_2c | calc_2d | calc_2a                                           | calc_2b | calc_2c | calc_2d | calc_2a                                       | calc_2b | calc_2c | calc_2d |
| 1                | 73.7                                             | 77.10   | 73.18   | 75.81   | 78.99   | 3.40                                              | 0.52    | 2.11    | 5.29    |                                               |         |         |         |
| 2                | 43.6                                             | 35.66   | 43.07   | 45.53   | 41.93   | 7.94                                              | 0.53    | 1.93    | 1.67    |                                               |         |         |         |
| 3                | 61.6                                             | 66.73   | 67.70   | 62.97   | 67.15   | 5.13                                              | 6.10    | 1.37    | 5.55    |                                               |         |         |         |
| 5                | 62.5                                             | 67.55   | 72.90   | 67.07   | 72.76   | 5.05                                              | 10.40   | 4.57    | 10.26   |                                               |         |         |         |
| 6                | 78.7                                             | 79.39   | 80.47   | 86.37   | 78.04   | 0.69                                              | 1.77    | 7.67    | 0.67    |                                               |         |         |         |
| 7                | 68.9                                             | 72.86   | 73.56   | 75.09   | 76.47   | 3.96                                              | 4.66    | 6.19    | 7.57    |                                               |         |         |         |
| 7a               | 73.9                                             | 78.75   | 77.54   | 73.28   | 71.30   | 4.85                                              | 3.64    | 0.62    | 2.60    |                                               |         |         |         |
| 8                | 63.3                                             | 64.06   | 65.84   | 67.08   | 69.30   | 0.76                                              | 2.54    | 3.78    | 6.00    |                                               |         |         |         |
| 9                | 40.8                                             | 46.80   | 44.15   | 48.68   | 42.94   | 6.00                                              | 3.35    | 7.88    | 2.14    |                                               |         |         |         |
| 11               | 173.7                                            | 173.34  | 174.13  | 175.50  | 174.14  | 0.36                                              | 0.43    | 1.80    | 0.44    |                                               |         |         |         |
| 12               | 22.6                                             | 24.09   | 23.94   | 24.38   | 23.86   | 1.49                                              | 1.34    | 1.78    | 1.26    |                                               |         |         |         |
| MAE <sup>b</sup> |                                                  |         |         |         |         | 3.60                                              | 3.21    | 3.61    | 3.95    |                                               |         |         |         |

<sup>a</sup>  $|\Delta\delta|(^{13}\text{C}) = |\delta_{\text{exp}} - \delta_{\text{calc}}|(^{13}\text{C}), \text{ppm}$ : absolute differences for experimental versus calculated  $^{13}\text{C}$  NMR chemical shifts

<sup>b</sup>  $\text{MAE} = \Sigma[|(\delta_{\text{exp}} - \delta_{\text{calcd}})|]/n$ , summation through n of the absolute error values (difference of the absolute values between corresponding experimental and  $^{13}\text{C}$  chemical shifts), normalized to the number of the chemical shifts

**Table S25.**  $^{13}\text{C}$  experimental related to exp\_2d set of data and calculated NMR chemical shifts (B97-2/cc-pVTZ level of theory) related to calc\_2a, calc\_2b, calc\_2c, calc\_2d sets of data, with <sup>a</sup> $|\Delta\delta|(^{13}\text{C})$  and <sup>b</sup>MAE values.

| Position         | $\delta_{\text{exp}}(^{13}\text{C}), \text{ppm}$ |         |         |         |         | $\delta_{\text{calc}}(^{13}\text{C}), \text{ppm}$ |         |         |         | $ \Delta\delta (^{13}\text{C}), \text{ppm}^{\text{a}}$ |         |         |         |
|------------------|--------------------------------------------------|---------|---------|---------|---------|---------------------------------------------------|---------|---------|---------|--------------------------------------------------------|---------|---------|---------|
|                  | exp_2d                                           | calc_2a | calc_2b | calc_2c | calc_2d | calc_2a                                           | calc_2b | calc_2c | calc_2d | calc_2a                                                | calc_2b | calc_2c | calc_2d |
| 1                | 76.6                                             | 77.10   | 73.18   | 75.81   | 78.99   | 0.50                                              | 3.42    | 0.79    | 2.39    |                                                        |         |         |         |
| 2                | 39.8                                             | 35.66   | 43.07   | 45.53   | 41.93   | 4.14                                              | 3.27    | 5.73    | 2.13    |                                                        |         |         |         |
| 3                | 66.2                                             | 66.73   | 67.70   | 62.97   | 67.15   | 0.53                                              | 1.50    | 3.23    | 0.95    |                                                        |         |         |         |
| 5                | 71.5                                             | 67.55   | 72.90   | 67.07   | 72.76   | 3.95                                              | 1.40    | 4.43    | 1.26    |                                                        |         |         |         |
| 6                | 74.1                                             | 79.39   | 80.47   | 86.37   | 78.04   | 5.29                                              | 6.37    | 12.27   | 3.94    |                                                        |         |         |         |
| 7                | 73.9                                             | 72.86   | 73.56   | 75.09   | 76.47   | 1.04                                              | 0.34    | 1.19    | 2.57    |                                                        |         |         |         |
| 7a               | 70.8                                             | 78.75   | 77.54   | 73.28   | 71.30   | 7.95                                              | 6.74    | 2.48    | 0.50    |                                                        |         |         |         |
| 8                | 68.7                                             | 64.06   | 65.84   | 67.08   | 69.30   | 4.64                                              | 2.86    | 1.62    | 0.59    |                                                        |         |         |         |
| 9                | 42.8                                             | 46.80   | 44.15   | 48.68   | 42.94   | 4.00                                              | 1.35    | 5.88    | 0.14    |                                                        |         |         |         |
| 11               | 173.7                                            | 173.34  | 174.13  | 175.50  | 174.14  | 0.36                                              | 0.43    | 1.80    | 0.44    |                                                        |         |         |         |
| 12               | 22.6                                             | 24.09   | 23.94   | 24.38   | 23.86   | 1.49                                              | 1.34    | 1.78    | 1.26    |                                                        |         |         |         |
| MAE <sup>b</sup> |                                                  |         |         |         |         | 3.08                                              | 2.64    | 3.75    | 1.47    |                                                        |         |         |         |

<sup>a</sup>  $|\Delta\delta|(^{13}\text{C}) = |\delta_{\text{exp}} - \delta_{\text{calc}}|(^{13}\text{C}), \text{ppm}$ : absolute differences for experimental versus calculated  $^{13}\text{C}$  NMR chemical shifts

<sup>b</sup>  $\text{MAE} = \Sigma[|(\delta_{\text{exp}} - \delta_{\text{calcd}})|]/n$ , summation through n of the absolute error values (difference of the absolute values between corresponding experimental and  $^{13}\text{C}$  chemical shifts), normalized to the number of the chemical shifts

**Table S26.** Sampled and DFT geometry optimized conformers related to calc\_1a, with energy values (Hartree) and related % contribution on the final Boltzmann distribution for the three employed functional/basis set combinations.

| Conformer       | MPW1PW91/6-31g(d,p) |                                              | MPW1PW91/6-311+g(d,p) |                                              | B97-2/cc-pVTZ    |                                              |
|-----------------|---------------------|----------------------------------------------|-----------------------|----------------------------------------------|------------------|----------------------------------------------|
|                 | Energy (Hartree)    | % contribution on the Boltzmann distribution | Energy (Hartree)      | % contribution on the Boltzmann distribution | Energy (Hartree) | % contribution on the Boltzmann distribution |
| calc_1a conf_1  | -997.7100047        | 52.18%                                       | -997.9450900          | 64.59%                                       | -997.9038062     | 63.05%                                       |
| calc_1a conf_2  | -997.7088563        | 15.46%                                       | -997.9435817          | 13.07%                                       | -997.9025508     | 16.68%                                       |
| calc_1a conf_3  | -997.7083563        | 9.10%                                        | -997.9428143          | 5.80%                                        | -997.9016043     | 6.12%                                        |
| calc_1a conf_4  | -997.7082807        | 8.40%                                        | -997.9430366          | 7.34%                                        | -997.9014365     | 5.12%                                        |
| calc_1a conf_5  | -997.7077996        | 5.05%                                        | -997.9421001          | 2.72%                                        | -997.9009142     | 2.95%                                        |
| calc_1a conf_6  | -997.7069035        | 1.95%                                        | -997.9413632          | 1.25%                                        | -997.8999644     | 1.08%                                        |
| calc_1a conf_7  | -997.7065498        | 1.34%                                        | -997.9410529          | 0.90%                                        | -997.8992952     | 0.53%                                        |
| calc_1a conf_8  | -997.7065316        | 1.32%                                        | -997.9406889          | 0.61%                                        | -997.8985534     | 0.24%                                        |
| calc_1a conf_9  | -997.7065042        | 1.28%                                        | -997.9411241          | 0.97%                                        | -997.9001548     | 1.32%                                        |
| calc_1a conf_10 | -997.7064842        | 1.25%                                        | -997.9412112          | 1.06%                                        | -997.9001646     | 1.33%                                        |
| calc_1a conf_11 | -997.7064661        | 1.23%                                        | -997.9405997          | 0.56%                                        | -997.8988813     | 0.34%                                        |
| calc_1a conf_12 | -997.7051654        | 0.31%                                        | -997.9390339          | 0.11%                                        | -997.8973415     | 0.07%                                        |
| calc_1a conf_13 | -997.7049233        | 0.24%                                        | -997.9399940          | 0.29%                                        | -997.8990698     | 0.42%                                        |
| calc_1a conf_14 | -997.7049203        | 0.24%                                        | -997.9398862          | 0.26%                                        | -997.8989558     | 0.37%                                        |
| calc_1a conf_15 | -997.7046194        | 0.17%                                        | -997.9391947          | 0.13%                                        | -997.8975500     | 0.08%                                        |
| calc_1a conf_16 | -997.7045258        | 0.16%                                        | -997.9391402          | 0.12%                                        | -997.8975233     | 0.08%                                        |
| calc_1a conf_17 | -997.7036931        | 0.07%                                        | -997.9381556          | 0.04%                                        | -997.8968189     | 0.04%                                        |
| calc_1a conf_18 | -997.7036183        | 0.06%                                        | -997.9383642          | 0.05%                                        | -997.8971150     | 0.05%                                        |
| calc_1a conf_19 | -997.7031591        | 0.04%                                        | -997.9383256          | 0.05%                                        | -997.8969003     | 0.04%                                        |
| calc_1a conf_20 | -997.7031085        | 0.04%                                        | -997.9380534          | 0.04%                                        | -997.8965821     | 0.03%                                        |
| calc_1a conf_21 | -997.7030426        | 0.03%                                        | -997.9372161          | 0.02%                                        | -997.8963949     | 0.02%                                        |
| calc_1a conf_22 | -997.7025020        | 0.02%                                        | -997.9365943          | 0.01%                                        | -997.8939768     | 0.00%                                        |
| calc_1a conf_23 | -997.7024711        | 0.02%                                        | -997.9366162          | 0.01%                                        | -997.8944996     | 0.00%                                        |
| calc_1a conf_24 | -997.7023113        | 0.02%                                        | -997.9370736          | 0.01%                                        | -997.8957753     | 0.01%                                        |
| calc_1a conf_25 | -997.7022650        | 0.01%                                        | -997.9364762          | 0.01%                                        | -997.8944422     | 0.00%                                        |
| calc_1a conf_26 | -997.7005001        | 0.00%                                        | -997.9343100          | 0.00%                                        | -997.8923604     | 0.00%                                        |
| calc_1a conf_27 | -997.6985464        | 0.00%                                        | -997.9338218          | 0.00%                                        | -997.8915728     | 0.00%                                        |



**Table S27.** Cartesian coordinates of the optimized geometries for the conformers related to calc\_1a. The related energies and % contribution on the final Boltzmann distribution for the three employed functional/basis set combinations are reported in Table S26.

calc\_1a conf\_1

|   |               |               |               |
|---|---------------|---------------|---------------|
| C | -5.7028004057 | 0.1252675446  | 3.626082063   |
| C | -6.4765350458 | 0.0458975075  | 2.4749069827  |
| C | -5.9161264461 | -0.3304778576 | 1.2446825126  |
| C | -4.5672593435 | -0.6137808691 | 1.1774870237  |
| C | -3.7564570587 | -0.5214768629 | 2.3249839931  |
| C | -4.3399762212 | -0.1702163411 | 3.5661743008  |
| O | -3.6301790667 | -0.1097732216 | 4.6906907846  |
| O | -7.8000267818 | 0.3187252075  | 2.4791182461  |
| C | -3.8982038905 | -1.0601586625 | -0.091751582  |
| C | -2.4570278509 | -0.5851596574 | -0.1154207915 |
| O | -1.7651406027 | -1.0334757411 | 1.0716722742  |
| C | -2.3309739461 | -0.8258908194 | 2.2686448041  |
| O | -1.623267428  | -0.9203752227 | 3.2667984604  |
| C | -1.659698452  | -1.1035592403 | -1.2971019195 |
| C | -0.2596633373 | -0.5138051864 | -1.3851381537 |
| C | 0.5562434291  | -1.1018517604 | -2.5319097751 |
| C | 1.8954012064  | -0.3760565276 | -2.6527678917 |
| C | 1.6634304127  | 1.1311419816  | -2.7550557685 |
| C | 0.7721733727  | 1.6443923556  | -1.6205334802 |
| O | -0.4336902832 | 0.885803272   | -1.5579142293 |
| C | 1.4763108474  | 1.7209574503  | -0.2688444473 |
| H | -6.1329634183 | 0.4003750881  | 4.5839867927  |
| H | -6.5554810117 | -0.391688831  | 0.3716011196  |
| H | -2.7128839711 | -0.4081852107 | 4.4581081802  |
| H | -8.0702488338 | 0.5654031683  | 3.3734010062  |
| H | -4.4270663075 | -0.6727810017 | -0.9675286616 |
| H | -3.9203387134 | -2.1565228384 | -0.1584225392 |
| H | -2.4264446933 | 0.5096940577  | -0.1138933834 |
| H | -2.2017007566 | -0.8527090717 | -2.216278581  |
| H | -1.5941410674 | -2.1957054886 | -1.2346703076 |
| H | 0.2607737731  | -0.7117972903 | -0.4370119364 |
| H | -0.0130008634 | -0.9870004661 | -3.4638427703 |
| H | 0.7059647587  | -2.1752632973 | -2.3685874878 |
| H | 2.4497493952  | -0.7337318876 | -3.5268620676 |
| H | 2.5156056302  | -0.6059932697 | -1.7774212686 |
| H | 2.6141370993  | 1.6759605439  | -2.7559030134 |
| H | 1.1648736111  | 1.3502558141  | -3.7068032053 |
| H | 0.4265655219  | 2.651829159   | -1.8750847356 |
| H | 2.2795288812  | 2.4632800296  | -0.3067642443 |
| H | 1.9204233957  | 0.7691177925  | 0.0336210453  |
| H | 0.7661144616  | 2.022335651   | 0.5055526512  |

calc\_1a conf\_2

|   |               |               |               |
|---|---------------|---------------|---------------|
| C | -5.7663930421 | 0.0425980704  | 3.5039931249  |
| C | -6.3760227421 | 0.1729049941  | 2.262499665   |
| C | -5.6872983739 | -0.1279925238 | 1.0773578359  |
| C | -4.3746473175 | -0.5473850328 | 1.1493681451  |
| C | -3.7266766812 | -0.6682866902 | 2.3934086755  |
| C | -4.4424073472 | -0.3923368026 | 3.5833629037  |
| O | -3.8946002167 | -0.5324891286 | 4.7881601984  |
| O | -7.6553707707 | 0.5873854259  | 2.1304282026  |
| C | -3.5782429005 | -0.9216428035 | -0.0687700996 |

|   |               |               |               |
|---|---------------|---------------|---------------|
| C | -2.1108554107 | -0.6016212635 | 0.1511195908  |
| O | -1.6350485467 | -1.2496484873 | 1.3512147868  |
| C | -2.3416007507 | -1.1175033697 | 2.4831772868  |
| O | -1.7937230186 | -1.4010400261 | 3.5433609905  |
| C | -1.2013581235 | -1.0676329616 | -0.9701158964 |
| C | 0.2396330712  | -0.56877036   | -0.8070907774 |
| C | 1.1978635872  | -1.1306297478 | -1.8588226554 |
| C | 1.0037643447  | -0.4637356476 | -3.2178951842 |
| C | 1.0835842081  | 1.0516393629  | -3.0558734959 |
| C | 0.0978542072  | 1.5311198421  | -1.9946788313 |
| O | 0.3014288138  | 0.8534005105  | -0.7595607381 |
| C | 0.2278746289  | 3.0106002641  | -1.6897378285 |
| H | -6.2982495222 | 0.2578754135  | 4.4254609846  |
| H | -6.2017930872 | -0.0248833704 | 0.1289498455  |
| H | -2.9859886126 | -0.9028385363 | 4.6410963761  |
| H | -8.0232135871 | 0.7654651881  | 3.0060065816  |
| H | -3.9436120811 | -0.3875378307 | -0.9510021122 |
| H | -3.6883911297 | -1.9956368959 | -0.2715554127 |
| H | -1.9842862279 | 0.4775326266  | 0.2966436536  |
| H | -1.2031122918 | -2.163539855  | -0.9908881527 |
| H | -1.6271458038 | -0.7322188322 | -1.9220858985 |
| H | 0.5791609586  | -0.8792648559 | 0.1849527158  |
| H | 1.0765928588  | -2.2174282624 | -1.9272798335 |
| H | 2.2222556387  | -0.9436977602 | -1.5161417766 |
| H | 0.0301026741  | -0.7389012907 | -3.6443069426 |
| H | 1.7607741354  | -0.8178467012 | -3.9255220353 |
| H | 0.877525738   | 1.5618145541  | -4.0037006155 |
| H | 2.0965821642  | 1.3374894036  | -2.7444218153 |
| H | -0.9243562888 | 1.3332143356  | -2.3600382062 |
| H | 1.2325498118  | 3.2313556417  | -1.3179558363 |
| H | -0.4917756626 | 3.3090636167  | -0.9231767703 |
| H | 0.0486226964  | 3.6070497862  | -2.5889406486 |

calc\_1a conf\_3

|   |               |               |               |
|---|---------------|---------------|---------------|
| C | -5.8456043311 | 0.0791484077  | 3.2974420107  |
| C | -6.0677400596 | 0.5095667     | 1.9950118303  |
| C | -5.1263843087 | 0.2796207655  | 0.9803171559  |
| C | -3.9513165547 | -0.3762685795 | 1.2872317515  |
| C | -3.6930150912 | -0.8041970346 | 2.6036966006  |
| C | -4.6641923556 | -0.5942037404 | 3.611829829   |
| O | -4.4908784037 | -1.018059544  | 4.8621478626  |
| O | -7.1961459501 | 1.1628874249  | 1.6383259593  |
| C | -2.910482609  | -0.6970488754 | 0.2539063637  |
| C | -1.5306908686 | -0.6757828807 | 0.8838374661  |
| O | -1.4870346646 | -1.5756107269 | 2.0156398475  |
| C | -2.4580181302 | -1.5040013726 | 2.9381040428  |
| O | -2.2629445242 | -2.04361677   | 4.0230665679  |
| C | -0.3908539321 | -1.1113700784 | -0.0257523531 |
| C | 0.1128959472  | -0.0359805289 | -0.9772581621 |
| C | 1.3496886452  | -0.4906695708 | -1.7482044864 |
| C | 1.7596131016  | 0.5620249566  | -2.7750895876 |
| C | 0.566666606   | 0.9091481457  | -3.6627765473 |
| C | -0.6602075121 | 1.2950749436  | -2.8327548203 |
| O | -0.9485885707 | 0.2842082134  | -1.86641205   |
| C | -0.5659603311 | 2.681812881   | -2.2025196771 |
| H | -6.5773432209 | 0.2391701538  | 4.0831268844  |
| H | -5.3418056196 | 0.6193436049  | -0.0260850432 |
| H | -3.6347709068 | -1.5195048539 | 4.8700788944  |

|   |               |               |               |
|---|---------------|---------------|---------------|
| H | -7.763323996  | 1.2620574931  | 2.4142622216  |
| H | -2.9323498654 | 0.0035500386  | -0.582213112  |
| H | -3.0943024179 | -1.6979105098 | -0.1597314802 |
| H | -1.3263140321 | 0.3315746033  | 1.2721466075  |
| H | -0.6894247371 | -1.9956164973 | -0.60014595   |
| H | 0.4421573665  | -1.4105620167 | 0.6190497718  |
| H | 0.3790410698  | 0.8557403527  | -0.384611778  |
| H | 1.1146868726  | -1.4338243349 | -2.2579352908 |
| H | 2.1662787292  | -0.6930169118 | -1.0463169665 |
| H | 2.5927907407  | 0.1987958229  | -3.3855601681 |
| H | 2.1233499595  | 1.458960763   | -2.2582215781 |
| H | 0.8134332073  | 1.7203887689  | -4.3566467311 |
| H | 0.3077863617  | 0.0333717892  | -4.269458568  |
| H | -1.540957301  | 1.2827279322  | -3.4829543923 |
| H | 0.3247873476  | 2.80656003    | -1.5808019546 |
| H | -1.4443709263 | 2.8709404241  | -1.5794311863 |
| H | -0.5311547344 | 3.4465706114  | -2.9843397844 |

calc\_la conf\_4

|   |               |               |               |
|---|---------------|---------------|---------------|
| C | -5.9352955581 | -0.9158737704 | 2.7619282609  |
| C | -6.1582912927 | 0.4335186197  | 2.5192018545  |
| C | -5.1038710293 | 1.2980296055  | 2.1855243393  |
| C | -3.8241974638 | 0.7918551868  | 2.0874838464  |
| C | -3.5737670635 | -0.5759943881 | 2.3073783463  |
| C | -4.6412967548 | -1.4322883946 | 2.6693255483  |
| O | -4.4571571866 | -2.7254241434 | 2.9249014892  |
| O | -7.3901713759 | 0.9834601784  | 2.5962178491  |
| C | -2.6291742392 | 1.6535131446  | 1.7975672786  |
| C | -1.5792920276 | 0.8800539618  | 1.0135505201  |
| O | -1.2483273271 | -0.3513748104 | 1.6964872419  |
| C | -2.2288009703 | -1.1273375434 | 2.1785860659  |
| O | -1.944800474  | -2.277701427  | 2.5007818183  |
| C | -1.9735814295 | 0.5821534576  | -0.4283278928 |
| C | -0.8568774329 | -0.0756711193 | -1.2255887284 |
| C | -1.2810039469 | -0.4442906445 | -2.6433280723 |
| C | -0.0832290208 | -0.9728862092 | -3.4308584679 |
| C | 1.0695041791  | 0.0277853918  | -3.3608116043 |
| C | 1.3923004576  | 0.4204397711  | -1.9164479103 |
| O | 0.2121609834  | 0.8610554053  | -1.2481453877 |
| C | 2.1306725272  | -0.6602863485 | -1.1317818053 |
| H | -6.7435184221 | -1.5871742331 | 3.0347300809  |
| H | -5.3161199748 | 2.3475950821  | 2.017931765   |
| H | -3.4797359563 | -2.8857483829 | 2.8568365382  |
| H | -8.0291794231 | 0.2990010557  | 2.8347197268  |
| H | -2.188670367  | 1.9865381187  | 2.7461303657  |
| H | -2.9142494464 | 2.5539668057  | 1.2458684508  |
| H | -0.6360694474 | 1.4271871905  | 1.0049100428  |
| H | -2.2331295985 | 1.5296368631  | -0.9152532986 |
| H | -2.8665810532 | -0.0522156137 | -0.4519183294 |
| H | -0.5406320731 | -0.9880422198 | -0.6987610739 |
| H | -1.6824521852 | 0.4518590768  | -3.1343818006 |
| H | -2.0855013875 | -1.1877617457 | -2.608561455  |
| H | -0.3596682201 | -1.1583905102 | -4.4741582479 |
| H | 0.2278583587  | -1.9402541358 | -3.0170567439 |
| H | 1.9669542062  | -0.3719533492 | -3.8462634527 |
| H | 0.7852046547  | 0.9357375538  | -3.9060456715 |
| H | 2.0255348619  | 1.313808727   | -1.9300253879 |
| H | 1.6084752979  | -1.6206482651 | -1.1318781702 |

|   |              |               |               |
|---|--------------|---------------|---------------|
| H | 2.2563424178 | -0.3460093152 | -0.0923543845 |
| H | 3.1226342034 | -0.8238686264 | -1.5641135438 |

calc\_1a conf\_5

|   |               |               |               |
|---|---------------|---------------|---------------|
| C | -5.7542268419 | 0.0617368229  | 3.3863784529  |
| C | -5.764845985  | 0.9975475601  | 2.3591571451  |
| C | -4.7754815531 | 0.9992220216  | 1.3641758127  |
| C | -3.7665531984 | 0.0589696186  | 1.415948051   |
| C | -3.7216601019 | -0.8876075431 | 2.4571440923  |
| C | -4.7421161113 | -0.8977295226 | 3.4384972541  |
| O | -4.7727558099 | -1.7970061124 | 4.419722763   |
| O | -6.7240666532 | 1.9444962435  | 2.2615584933  |
| C | -2.6956170041 | -0.0320527712 | 0.3672642591  |
| C | -1.4049563596 | -0.5402261475 | 0.9813145617  |
| O | -1.6327534769 | -1.7925397242 | 1.6661615743  |
| C | -2.6656757346 | -1.8910038136 | 2.5166887491  |
| O | -2.6768969942 | -2.8345712687 | 3.3010400675  |
| C | -0.2766856313 | -0.8203364262 | 0.0010283151  |
| C | 0.3729246609  | 0.4357173182  | -0.5923103219 |
| C | 1.6893239825  | 0.1393874044  | -1.3168908572 |
| C | 1.4504235774  | -0.5155829347 | -2.6743055436 |
| C | 0.4869872618  | 0.3432478041  | -3.4885662973 |
| C | -0.7926852151 | 0.6116209935  | -2.702902918  |
| O | -0.5043555035 | 1.1842194105  | -1.4295538791 |
| C | -1.7214314235 | 1.5836434942  | -3.403632594  |
| H | -6.5255668545 | 0.0453706068  | 4.1500436105  |
| H | -4.8240877593 | 1.7387991354  | 0.5733875468  |
| H | -4.0186316143 | -2.4190927615 | 4.2511323852  |
| H | -7.3436592184 | 1.8451834845  | 2.9963349844  |
| H | -2.5104850731 | 0.9334251174  | -0.1075949008 |
| H | -3.0111948079 | -0.7264855274 | -0.4238544797 |
| H | -1.0616827186 | 0.1786610194  | 1.7383198818  |
| H | 0.49297137    | -1.3731973992 | 0.5505091577  |
| H | -0.6403048084 | -1.4959226605 | -0.7804868545 |
| H | 0.5834340273  | 1.1213857622  | 0.2371498609  |
| H | 2.3313173216  | -0.4808665845 | -0.6823187557 |
| H | 2.2102808436  | 1.0918196803  | -1.4697956886 |
| H | 1.0321446269  | -1.52182467   | -2.5440119092 |
| H | 2.3993939846  | -0.641435282  | -3.2058870579 |
| H | 0.2358160757  | -0.1395241482 | -4.4396898389 |
| H | 0.9588932355  | 1.3056428974  | -3.7255557022 |
| H | -1.3199692814 | -0.3462243215 | -2.5619342308 |
| H | -1.2268085814 | 2.5506355108  | -3.5326906602 |
| H | -2.6317105713 | 1.740847292   | -2.8192173496 |
| H | -2.0040460821 | 1.2016504212  | -4.3887571792 |

calc\_1a conf\_6

|   |               |               |              |
|---|---------------|---------------|--------------|
| C | -5.9451858806 | -1.0203796414 | 2.6503891195 |
| C | -6.1709819289 | 0.247218393   | 2.1292870136 |
| C | -5.1061667661 | 1.0770564893  | 1.7442130504 |
| C | -3.8124637043 | 0.6173221685  | 1.8785857541 |
| C | -3.5561700619 | -0.670929283  | 2.3851872548 |
| C | -4.6373292831 | -1.4882187364 | 2.7939944327 |
| O | -4.4532733506 | -2.6996465481 | 3.3130572618 |
| O | -7.4157468521 | 0.748460069   | 1.9712319423 |
| C | -2.6128365535 | 1.4590935222  | 1.5522020373 |
| C | -1.4655302207 | 0.5960044646  | 1.0491805354 |

|   |               |               |               |
|---|---------------|---------------|---------------|
| O | -1.1819445976 | -0.4611407444 | 1.9939709025  |
| C | -2.1925446764 | -1.1758477546 | 2.5096961673  |
| O | -1.919887503  | -2.2296346452 | 3.0770093742  |
| C | -1.685778582  | -0.0024321955 | -0.3363158172 |
| C | -0.4241439646 | -0.6858193698 | -0.8763124393 |
| C | -0.6504798936 | -1.4335378919 | -2.1915069343 |
| C | -0.7759250843 | -0.4765698512 | -3.3742139602 |
| C | 0.4263368016  | 0.4639511197  | -3.3959221035 |
| C | 0.5859968062  | 1.167622737   | -2.0514485492 |
| O | 0.6624234976  | 0.2291364178  | -0.9846106358 |
| C | 1.8483655866  | 2.0037305369  | -1.9681470203 |
| H | -6.7628164249 | -1.6619991308 | 2.9634678513  |
| H | -5.3225476825 | 2.0656183896  | 1.3560015128  |
| H | -3.4710765558 | -2.8278434047 | 3.3794109842  |
| H | -8.0618708381 | 0.0949454821  | 2.2698321229  |
| H | -2.2876443126 | 1.9861937545  | 2.458403669   |
| H | -2.8558602929 | 2.2241200046  | 0.8090654693  |
| H | -0.5395184998 | 1.1736510414  | 1.0326917606  |
| H | -2.5055645915 | -0.7285887548 | -0.2994665844 |
| H | -2.0139011231 | 0.7972182566  | -1.0096387642 |
| H | -0.0892869272 | -1.3992030452 | -0.1175598323 |
| H | -1.5325383531 | -2.0775671646 | -2.104587296  |
| H | 0.2110188522  | -2.0907580377 | -2.3580425512 |
| H | -1.702387135  | 0.1075807934  | -3.2971521491 |
| H | -0.8435210353 | -1.0387318669 | -4.3115504983 |
| H | 0.3284626981  | 1.2122429349  | -4.1907082102 |
| H | 1.3401986458  | -0.1096035691 | -3.5982367714 |
| H | -0.2860942851 | 1.8267765414  | -1.9016615175 |
| H | 1.9269687808  | 2.4842909685  | -0.9895803263 |
| H | 1.8494661849  | 2.7792348503  | -2.7395395584 |
| H | 2.7287791063  | 1.3699827     | -2.107676697  |

calc\_1a conf\_7

|   |               |               |               |
|---|---------------|---------------|---------------|
| C | -5.8757080863 | -0.7794434174 | 2.3556051759  |
| C | -5.7886106866 | 0.3726029519  | 1.5837378208  |
| C | -4.5506811835 | 0.9704688489  | 1.3026466101  |
| C | -3.3975974124 | 0.3946665824  | 1.7960914154  |
| C | -3.4566902499 | -0.785553789  | 2.5608584685  |
| C | -4.7129978481 | -1.3642931574 | 2.8603371919  |
| O | -4.8293806289 | -2.4579539883 | 3.611076637   |
| O | -6.8842031035 | 0.9766676583  | 1.0713134601  |
| C | -2.0404195157 | 1.004261287   | 1.5955721005  |
| C | -0.9707420724 | -0.0737686421 | 1.5159736053  |
| O | -1.0506737215 | -0.9524323428 | 2.6627016193  |
| C | -2.2422850465 | -1.4154184036 | 3.066310244   |
| O | -2.2537042514 | -2.3533284714 | 3.858453333   |
| C | -0.9896373469 | -0.917296879  | 0.2402698978  |
| C | -0.3122580342 | -0.2664196605 | -0.9585234189 |
| C | -0.2134740968 | -1.2202622315 | -2.1473155336 |
| C | 0.3581454215  | -0.5026000716 | -3.368165818  |
| C | -0.4483647263 | 0.76354305    | -3.6498897082 |
| C | -0.5633677327 | 1.6462424108  | -2.4057995466 |
| O | -1.0609961702 | 0.8911521579  | -1.301671406  |
| C | 0.7208071954  | 2.3943695966  | -2.0588488614 |
| H | -6.8315004004 | -1.2380964173 | 2.5891618223  |
| H | -4.5239300285 | 1.8742084114  | 0.7052997036  |
| H | -3.9118437322 | -2.6870707185 | 3.9121017877  |
| H | -7.6702434497 | 0.477760841   | 1.3297644818  |

|   |               |               |               |
|---|---------------|---------------|---------------|
| H | -1.8158055337 | 1.6636043035  | 2.4440949192  |
| H | -2.0034892057 | 1.6019077973  | 0.6837921032  |
| H | 0.0170203874  | 0.382416331   | 1.6235747153  |
| H | -2.0188977867 | -1.1818631979 | -0.0266215077 |
| H | -0.457431907  | -1.8490300966 | 0.459075394   |
| H | 0.7084046487  | 0.0306205012  | -0.6624417841 |
| H | -1.2191180859 | -1.5958411302 | -2.3754225067 |
| H | 0.4038921149  | -2.0837202862 | -1.8753210591 |
| H | 0.3436263134  | -1.1627342713 | -4.2416472646 |
| H | 1.4112832859  | -0.2517206791 | -3.1889713219 |
| H | -0.0068218813 | 1.3379558942  | -4.4718472063 |
| H | -1.4601380975 | 0.4790766116  | -3.9619777788 |
| H | -1.3471044549 | 2.3914062712  | -2.576748547  |
| H | 0.9706656621  | 3.0993222344  | -2.8576080608 |
| H | 1.5789478414  | 1.7297869423  | -1.9270539605 |
| H | 0.5853236063  | 2.9618071686  | -1.1339372164 |

calc\_la conf\_8

|   |               |               |               |
|---|---------------|---------------|---------------|
| C | -5.6686246361 | -0.5212398905 | 1.8334752355  |
| C | -5.3780463147 | 0.711425831   | 1.2628782252  |
| C | -4.0669415304 | 1.2122333987  | 1.2375894653  |
| C | -3.046416518  | 0.4583863671  | 1.7823732395  |
| C | -3.3121214848 | -0.8026019298 | 2.3490729737  |
| C | -4.6422196996 | -1.2849109258 | 2.3927768807  |
| O | -4.9554467527 | -2.4523015138 | 2.9500808184  |
| O | -6.3345082305 | 1.4906740097  | 0.710874891   |
| C | -1.6277885924 | 0.9458351137  | 1.8531953461  |
| C | -0.6530535149 | -0.2172467957 | 1.7619620106  |
| O | -0.9695941019 | -1.2220604782 | 2.7532974603  |
| C | -2.2405534164 | -1.6139960164 | 2.9173114833  |
| O | -2.4464280408 | -2.6429436861 | 3.5540918693  |
| C | -0.5555386786 | -0.8924485184 | 0.3943495811  |
| C | 0.2497859732  | -0.0993448409 | -0.6440775795 |
| C | 0.5868754926  | -0.9244606973 | -1.8900533802 |
| C | -0.626876741  | -1.093575602  | -2.7997272418 |
| C | -1.2159672681 | 0.2781679794  | -3.1169856011 |
| C | -1.5113751287 | 1.0508597506  | -1.8356019828 |
| O | -0.3523893594 | 1.1388113749  | -1.0076914472 |
| C | -1.9478186139 | 2.4781842345  | -2.1023468706 |
| H | -6.6822358638 | -0.9080570291 | 1.8697318792  |
| H | -3.8838706337 | 2.1869522222  | 0.8006384054  |
| H | -4.1136790067 | -2.8125259516 | 3.3337020405  |
| H | -7.1899361423 | 1.0488410988  | 0.7929314312  |
| H | -1.4746379816 | 1.4603072476  | 2.8106454017  |
| H | -1.4023698816 | 1.6555143956  | 1.0547333932  |
| H | 0.3435038283  | 0.119879103   | 2.0598052303  |
| H | -0.0430934154 | -1.8476981787 | 0.552260087   |
| H | -1.5577850808 | -1.1338381375 | 0.0249311557  |
| H | 1.1902417465  | 0.2029095774  | -0.1673583159 |
| H | 1.0011546183  | -1.8940819864 | -1.5934588376 |
| H | 1.3717393736  | -0.3937736293 | -2.4418608267 |
| H | -1.3846454106 | -1.7204781097 | -2.3127579791 |
| H | -0.3403100472 | -1.6131500941 | -3.7200424623 |
| H | -2.1356261075 | 0.1858111283  | -3.705556837  |
| H | -0.5014296723 | 0.8571134984  | -3.7164682568 |
| H | -2.311897557  | 0.5299255848  | -1.2865878536 |
| H | -1.1591644766 | 3.0221901572  | -2.6302560265 |
| H | -2.1547695553 | 3.0044974362  | -1.1666620814 |

H -2.8541415772 2.4942145023 -2.7142149241

calc\_1a conf\_9

C -5.5189209604 -0.3032289356 4.0931611035  
C -6.236356258 0.4648880254 3.184524649  
C -5.787246225 0.6445511125 1.8668711805  
C -4.6033281606 0.0558899567 1.472872824  
C -3.8468932127 -0.7113198859 2.3796506112  
C -4.3257838933 -0.9095575292 3.697340797  
O -3.6738420991 -1.6593640234 4.5828497232  
O -7.3973171536 1.0708132904 3.5153361369  
C -4.0725521817 0.1693302407 0.0721350949  
C -2.5533143417 0.1369746153 0.0821301009  
O -2.0890397444 -1.0450161078 0.7671960292  
C -2.5971994277 -1.3415980781 1.9739255571  
O -1.9874695108 -2.1447250171 2.6724490059  
C -1.9492691065 0.1377308309 -1.3087274112  
C -0.4298554535 0.2846368383 -1.3771891703  
C 0.3471603698 -1.0036419842 -1.1218627894  
C 1.837439006 -0.7866036457 -1.3742036013  
C 2.0481656026 -0.2078880142 -2.7711559066  
C 1.190558729 1.0396677369 -2.9950111508  
O -0.1760161559 0.7772129101 -2.6874219252  
C 1.7110259501 2.2787445909 -2.2707139766  
H -5.8685156851 -0.4588831109 5.1089176762  
H -6.3816976838 1.2416254475 1.185071767  
H -2.8957779224 -2.0461140572 4.1047838386  
H -7.6043655521 0.8788026708 4.4394609518  
H -4.4174946374 1.0927663224 -0.4016608499  
H -4.4442439422 -0.6654130202 -0.5371768276  
H -2.1818802165 1.0014026495 0.6495048082  
H -2.37175338 0.9924995361 -1.848353572  
H -2.2623220768 -0.7655642094 -1.8445577942  
H -0.1198305166 1.0397658389 -0.6342507699  
H -0.0333816112 -1.7729359544 -1.8065014081  
H 0.1605993135 -1.355652439 -0.1045562136  
H 2.3831225434 -1.7299936951 -1.2679834328  
H 2.2460256535 -0.1083569183 -0.6139977487  
H 3.1028862939 0.0315371917 -2.9480251265  
H 1.7588914835 -0.9602232872 -3.5145663698  
H 1.1705381485 1.2649927953 -4.0665694985  
H 2.6866790329 2.5673674141 -2.673656318  
H 1.8333316736 2.1210238415 -1.195607665  
H 1.0192433084 3.1128560566 -2.4164323292

calc\_1a conf\_10

C -5.6148711677 -0.5450433466 4.0095492508  
C -6.0276236825 0.6213304456 3.3775319666  
C -5.3923288604 1.0845579323 2.2145830732  
C -4.3295138475 0.3723088022 1.6986701364  
C -3.8785029497 -0.8024487925 2.3310510417  
C -4.5470856355 -1.2755269104 3.4861438046  
O -4.1919291187 -2.4023236238 4.0988381365  
O -7.0566277516 1.3636384702 3.8402114987  
C -3.6208909065 0.7802735498 0.4380977626  
C -2.1601283248 0.3655517782 0.4981347176  
O -2.0600231958 -1.0475350654 0.7716215447

|   |               |               |               |
|---|---------------|---------------|---------------|
| C | -2.7625326565 | -1.5677812548 | 1.7912780106  |
| O | -2.4371010631 | -2.6747435163 | 2.2068994995  |
| C | -1.4058282064 | 0.6377203045  | -0.7915719757 |
| C | 0.1246904677  | 0.5081172008  | -0.69760902   |
| C | 0.6671506363  | -0.9217996626 | -0.7431222294 |
| C | 0.5850442927  | -1.5092453752 | -2.1500186716 |
| C | 1.2413566996  | -0.5590254374 | -3.148225499  |
| C | 0.6524220146  | 0.8423493044  | -3.0215916061 |
| O | 0.7531660002  | 1.3185789053  | -1.6839512652 |
| C | 1.3598900026  | 1.8653887473  | -3.8884451226 |
| H | -6.111802447  | -0.9173863722 | 4.8998351573  |
| H | -5.7516512078 | 1.9928127987  | 1.7448163691  |
| H | -3.467556004  | -2.8032388204 | 3.5531756635  |
| H | -7.4118986084 | 0.9525060544  | 4.6393030532  |
| H | -3.6895825003 | 1.8611379017  | 0.2852496676  |
| H | -4.0943252259 | 0.2996840859  | -0.4286366909 |
| H | -1.6750120829 | 0.8895474081  | 1.3332856646  |
| H | -1.8241864745 | -0.0029930852 | -1.5751932886 |
| H | -1.6129889006 | 1.6751425086  | -1.0784136809 |
| H | 0.4313957742  | 0.9703798425  | 0.2482985947  |
| H | 0.1343566487  | -1.546484613  | -0.022630884  |
| H | 1.7194921464  | -0.8846470959 | -0.4367968007 |
| H | -0.4628281913 | -1.6771266263 | -2.4312139024 |
| H | 1.0682133777  | -2.4915173418 | -2.1749851754 |
| H | 1.1179658682  | -0.9177446101 | -4.1766707388 |
| H | 2.3194293991  | -0.5003477337 | -2.9496615378 |
| H | -0.4102075072 | 0.8016363233  | -3.3154678091 |
| H | 2.4148830134  | 1.9319821641  | -3.6069737386 |
| H | 0.9095022482  | 2.8530157727  | -3.7601513129 |
| H | 1.2970679269  | 1.586298983   | -4.9442436638 |

calc\_1a conf\_11

|   |               |               |               |
|---|---------------|---------------|---------------|
| C | -5.7595852361 | -0.2566692914 | 3.2475952216  |
| C | -5.5908745571 | 1.1114469396  | 3.0736022628  |
| C | -4.4913006865 | 1.6271483597  | 2.3702691899  |
| C | -3.553022837  | 0.7562781753  | 1.8555170418  |
| C | -3.6879286862 | -0.6333766685 | 2.0379163465  |
| C | -4.8196089806 | -1.1427423241 | 2.7189952252  |
| O | -5.0221510689 | -2.4489137904 | 2.877794923   |
| O | -6.4727917153 | 2.0113937456  | 3.5618025416  |
| C | -2.37408164   | 1.2167815056  | 1.0472076124  |
| C | -1.1950020905 | 0.2917658526  | 1.2937721885  |
| O | -1.5607398608 | -1.0729123854 | 0.9963299236  |
| C | -2.7028493252 | -1.5633871208 | 1.4983779357  |
| O | -2.8669926044 | -2.7795285215 | 1.4735168184  |
| C | 0.0689536681  | 0.6020150291  | 0.5011758366  |
| C | -0.1288607863 | 1.0268353132  | -0.9616368371 |
| C | 1.2018632585  | 1.19438877    | -1.7036662895 |
| C | 1.806156309   | -0.1539484345 | -2.0910684605 |
| C | 0.7665589219  | -0.9902173165 | -2.8333985935 |
| C | -0.5124910201 | -1.1078938458 | -2.0114873547 |
| O | -1.0151136248 | 0.1882970529  | -1.6821354501 |
| C | -1.6311747614 | -1.8183041364 | -2.745493314  |
| H | -6.6173258064 | -0.6623948268 | 3.7747682258  |
| H | -4.4044927303 | 2.699812803   | 2.2414300602  |
| H | -4.2929706369 | -2.9065928045 | 2.3849551193  |
| H | -7.1832328362 | 1.5433136984  | 4.0198601672  |
| H | -2.1014353509 | 2.2455001266  | 1.3024404518  |



|   |               |               |               |
|---|---------------|---------------|---------------|
| H | -2.6265029431 | 1.189653535   | -0.0189418286 |
| H | -0.945734837  | 0.3147529137  | 2.3629944359  |
| H | 0.5885875595  | 1.4233872307  | 1.0094178557  |
| H | 0.7258068877  | -0.2699614303 | 0.5832767655  |
| H | -0.6392720199 | 1.9967996851  | -0.9537608889 |
| H | 1.8991861536  | 1.7810765469  | -1.0944808639 |
| H | 1.0080571638  | 1.7707735703  | -2.6157118962 |
| H | 2.1392674408  | -0.694311373  | -1.1957453185 |
| H | 2.6977018734  | -0.0026895251 | -2.7088769297 |
| H | 1.1545960345  | -1.9916616894 | -3.0511280816 |
| H | 0.5251153906  | -0.5174359911 | -3.7943718683 |
| H | -0.2947232568 | -1.6549413209 | -1.0836172459 |
| H | -1.3255477476 | -2.8315096306 | -3.0215772354 |
| H | -1.8961821193 | -1.2720527443 | -3.6558877052 |
| H | -2.5178608953 | -1.8869756822 | -2.1110299874 |

calc\_la conf\_12

|   |               |               |               |
|---|---------------|---------------|---------------|
| C | -5.9249304362 | -0.5357044603 | 3.023367344   |
| C | -5.9327495481 | 0.7211107323  | 2.4306493957  |
| C | -4.8199116534 | 1.2010472088  | 1.723789544   |
| C | -3.6903882079 | 0.41354019    | 1.6274774475  |
| C | -3.6499721856 | -0.8564930325 | 2.2357912533  |
| C | -4.7908717957 | -1.3421936793 | 2.9198448433  |
| O | -4.8227724165 | -2.5520860826 | 3.4748141676  |
| O | -7.0064111377 | 1.5391225048  | 2.4989154397  |
| C | -2.474580505  | 0.8384033223  | 0.8544784903  |
| C | -1.2325511351 | 0.249924011   | 1.5003746162  |
| O | -1.3486967947 | -1.1874697711 | 1.6051785448  |
| C | -2.4683131225 | -1.704600019  | 2.1338572706  |
| O | -2.4457970628 | -2.8770326212 | 2.4959931539  |
| C | 0.1016520069  | 0.5494945386  | 0.8309028825  |
| C | 0.2839343806  | 0.2726486859  | -0.6599519715 |
| C | 0.001258536   | -1.153550631  | -1.1232385523 |
| C | 0.2218246768  | -1.2562354665 | -2.6315355269 |
| C | -0.6154792524 | -0.1988249825 | -3.3500342085 |
| C | -0.369268446  | 1.2015502644  | -2.7823927427 |
| O | -0.5245151953 | 1.2078755754  | -1.3638156141 |
| C | 0.961097925   | 1.8139998562  | -3.2134375046 |
| H | -6.7884120403 | -0.9191529107 | 3.5578754103  |
| H | -4.8696799845 | 2.181971384   | 1.2655128638  |
| H | -3.9622950418 | -2.9881662541 | 3.2432418765  |
| H | -7.7037315731 | 1.1046086758  | 3.0073719725  |
| H | -2.3866625442 | 1.927625901   | 0.8212833856  |
| H | -2.5427407253 | 0.5055401743  | -0.1858310882 |
| H | -1.1710680638 | 0.6268835407  | 2.5304523962  |
| H | 0.3102612171  | 1.6137617911  | 0.9880838096  |
| H | 0.8687655009  | -0.0081235633 | 1.3793843471  |
| H | 1.3444960411  | 0.4875469289  | -0.8728798144 |
| H | -1.0316525228 | -1.4215499037 | -0.8810244487 |
| H | 0.6437198836  | -1.8535155311 | -0.5788849544 |
| H | -0.0441473751 | -2.2556629481 | -2.9910165308 |
| H | 1.2866785     | -1.1187102763 | -2.8600682318 |
| H | -1.6774174334 | -0.4403202005 | -3.2211099434 |
| H | -0.4149677847 | -0.2001851171 | -4.4273189818 |
| H | -1.1673734363 | 1.8664882124  | -3.1287134356 |
| H | 0.9616972095  | 1.9815810684  | -4.2948161512 |
| H | 1.8194538072  | 1.1781347113  | -2.9798959479 |
| H | 1.1055177357  | 2.7777181733  | -2.717674806  |

calc\_1a conf\_13

|   |               |               |               |
|---|---------------|---------------|---------------|
| C | -5.611353231  | -0.0793545962 | 3.9153905794  |
| C | -5.9299432686 | 0.8710752571  | 2.953470279   |
| C | -5.2345006433 | 0.9374809586  | 1.7361023439  |
| C | -4.2066931543 | 0.0479831564  | 1.4987327675  |
| C | -3.8493955103 | -0.9107421812 | 2.4654334342  |
| C | -4.5789262209 | -0.9877681595 | 3.6764709117  |
| O | -4.3137727339 | -1.9022419164 | 4.6062586559  |
| O | -6.9207492054 | 1.771432269   | 3.1338144595  |
| C | -3.4398822977 | 0.028223636   | 0.2064919027  |
| C | -2.0101512748 | -0.4206146265 | 0.4549246829  |
| O | -1.9991627301 | -1.6941746034 | 1.1361417298  |
| C | -2.7678437108 | -1.8580544688 | 2.2236516664  |
| O | -2.5303376534 | -2.8107407214 | 2.9587590151  |
| C | -1.1742562366 | -0.6348831158 | -0.7967137274 |
| C | -0.9110904541 | 0.6257629749  | -1.6329207422 |
| C | -0.0209103419 | 1.6716131779  | -0.9545145074 |
| C | 1.4396638444  | 1.2270124628  | -0.9149015302 |
| C | 1.8951454042  | 0.8417603103  | -2.3203608315 |
| C | 0.9501577224  | -0.1898649729 | -2.9297268694 |
| O | -0.3943966623 | 0.2801888975  | -2.9102727948 |
| C | 1.2662711842  | -0.5008528822 | -4.3791675427 |
| H | -6.1558084881 | -0.14665752   | 4.8520228896  |
| H | -5.5219121513 | 1.6850848515  | 1.0058256997  |
| H | -3.6018840694 | -2.4834557602 | 4.232678474   |
| H | -7.3235113967 | 1.631424187   | 4.0009357646  |
| H | -3.4493864981 | 1.01829302    | -0.2574696809 |
| H | -3.9142826318 | -0.6650867741 | -0.5010824661 |
| H | -1.5226774146 | 0.2985654771  | 1.125769159   |
| H | -0.2347450528 | -1.0974254172 | -0.4799933528 |
| H | -1.6837647576 | -1.3620378381 | -1.4384284117 |
| H | -1.8754737769 | 1.0885642596  | -1.8688667377 |
| H | -0.3914636532 | 1.8993462622  | 0.0513130998  |
| H | -0.094120377  | 2.5985933685  | -1.5352333722 |
| H | 1.5606314279  | 0.3706838576  | -0.2392935934 |
| H | 2.0667534911  | 2.0286827242  | -0.5110671041 |
| H | 2.9157374     | 0.4429193774  | -2.3072004912 |
| H | 1.8998225605  | 1.7311085845  | -2.9638727062 |
| H | 1.0221335779  | -1.1202636186 | -2.343475163  |
| H | 2.2781613072  | -0.9050424815 | -4.4743901588 |
| H | 1.1940314173  | 0.4071154324  | -4.9850300289 |
| H | 0.5588862596  | -1.2336528485 | -4.775205702  |

calc\_1a conf\_14

|   |               |               |              |
|---|---------------|---------------|--------------|
| C | -5.75895123   | 0.0108768015  | 3.6460255225 |
| C | -5.9975405948 | 0.7447655917  | 2.4908218592 |
| C | -5.1512827634 | 0.6439913943  | 1.375768987  |
| C | -4.0548012028 | -0.1917681642 | 1.4362625852 |
| C | -3.7783053389 | -0.9301542729 | 2.6020360153 |
| C | -4.6572224267 | -0.8439390408 | 3.7087738575 |
| O | -4.4703316052 | -1.5538051872 | 4.8186985801 |
| O | -7.0507849942 | 1.5834282568  | 2.3773480379 |
| C | -3.1234567599 | -0.3862457057 | 0.2732751008 |
| C | -1.717637622  | -0.6754325483 | 0.7708724959 |
| O | -1.7292450055 | -1.7983249858 | 1.6780501859 |
| C | -2.6259054977 | -1.8209286524 | 2.6751253741 |

|   |               |               |               |
|---|---------------|---------------|---------------|
| O | -2.440310754  | -2.6049894733 | 3.5999725747  |
| C | -0.7204408531 | -1.0531644058 | -0.3108948549 |
| C | -0.4411565952 | 0.0251358657  | -1.3524750777 |
| C | 0.1509273404  | 1.3098931558  | -0.7768819728 |
| C | 0.5699649275  | 2.2575472498  | -1.8998333464 |
| C | 1.4875298188  | 1.530099801   | -2.8800212354 |
| C | 0.8613690936  | 0.2213570329  | -3.367547993  |
| O | 0.4614301957  | -0.5837021004 | -2.2618267005 |
| C | -0.2674245526 | 0.4162877736  | -4.3763848595 |
| H | -6.418927579  | 0.0713516657  | 4.5057349906  |
| H | -5.3791565571 | 1.2228056754  | 0.4881074023  |
| H | -3.6858343959 | -2.1371540298 | 4.6487381247  |
| H | -7.5579658288 | 1.5691449072  | 3.1996663336  |
| H | -3.1186645595 | 0.5007743956  | -0.3665294312 |
| H | -3.4649516647 | -1.2279145697 | -0.344454451  |
| H | -1.3565349701 | 0.1884648023  | 1.3430287045  |
| H | -1.0808307205 | -1.9486971531 | -0.8278877031 |
| H | 0.2251901358  | -1.3249521222 | 0.1691498975  |
| H | -1.3770218536 | 0.2756710822  | -1.8792787744 |
| H | 1.0247756501  | 1.0469950082  | -0.1666337076 |
| H | -0.5729345435 | 1.8004120931  | -0.1155903112 |
| H | 1.0749353897  | 3.1377282286  | -1.488504195  |
| H | -0.3228313735 | 2.6288233922  | -2.4189951272 |
| H | 1.7334772577  | 2.1675549941  | -3.736618314  |
| H | 2.4303484691  | 1.2905631159  | -2.3743212935 |
| H | 1.6379408379  | -0.3806653597 | -3.8503296707 |
| H | -1.060021456  | 1.0733228871  | -4.007571187  |
| H | -0.7141336157 | -0.5500538816 | -4.6252035525 |
| H | 0.1247177973  | 0.8598964824  | -5.2966728706 |

calc\_1a conf\_15

|   |               |               |               |
|---|---------------|---------------|---------------|
| C | -5.7652652314 | -0.7110813385 | 2.2179141988  |
| C | -5.7252099573 | 0.6682988225  | 2.3767283573  |
| C | -4.5050535319 | 1.3544500149  | 2.4873465157  |
| C | -3.325432795  | 0.6423686406  | 2.4288773054  |
| C | -3.3372117081 | -0.7544447318 | 2.2507881848  |
| C | -4.5742640201 | -1.4375628701 | 2.1628248655  |
| O | -4.6465667471 | -2.7591116945 | 2.0261200264  |
| O | -6.8471624612 | 1.4175854827  | 2.4374243364  |
| C | -1.9800395477 | 1.2864001892  | 2.6008583669  |
| C | -0.9181958711 | 0.5548084438  | 1.7892401171  |
| O | -0.9285151425 | -0.8521052207 | 2.1164748173  |
| C | -2.0959235278 | -1.5128822613 | 2.1637005884  |
| O | -2.0581437464 | -2.7396273404 | 2.1363576021  |
| C | -1.0370493366 | 0.7677327722  | 0.2835453734  |
| C | 0.1188315004  | 0.1713770251  | -0.540503847  |
| C | -0.0213741532 | -1.3131512053 | -0.8849311985 |
| C | -1.0786523263 | -1.5418694808 | -1.9627993486 |
| C | -0.7924710736 | -0.6479664135 | -3.1663332244 |
| C | -0.6488099901 | 0.8071876781  | -2.7307721779 |
| O | 0.3425561071  | 0.9393560826  | -1.7177794308 |
| C | -0.2254390915 | 1.7267860552  | -3.8591473435 |
| H | -6.7051122506 | -1.2491405312 | 2.1442943724  |
| H | -4.5162445126 | 2.4298082603  | 2.622071466   |
| H | -3.7134525349 | -3.0951072258 | 2.0523026175  |
| H | -7.6190666321 | 0.8425621558  | 2.3518293925  |
| H | -1.6988547074 | 1.2492104528  | 3.6611291577  |
| H | -2.0062109685 | 2.3412815425  | 2.3137030039  |

|   |               |               |               |
|---|---------------|---------------|---------------|
| H | 0.0737295959  | 0.8781588678  | 2.1165079572  |
| H | -2.0126392424 | 0.4071043127  | -0.0589522329 |
| H | -1.0206514772 | 1.8502261258  | 0.1109706198  |
| H | 1.0404798662  | 0.3122825593  | 0.0366016618  |
| H | -0.2369342914 | -1.8928660816 | 0.0159612163  |
| H | 0.9486855894  | -1.6543516239 | -1.2658520133 |
| H | -2.0804411493 | -1.3220706938 | -1.5704421957 |
| H | -1.0919695702 | -2.5963440006 | -2.2571548426 |
| H | -1.5861565211 | -0.7300462673 | -3.9179218433 |
| H | 0.1448235723  | -0.9600561701 | -3.6449808099 |
| H | -1.6206634075 | 1.1509427483  | -2.3372652134 |
| H | -0.1274582597 | 2.7543523016  | -3.4996139109 |
| H | -0.9602513735 | 1.7082165921  | -4.669265546  |
| H | 0.7427809258  | 1.4112880251  | -4.2588569417 |

calc\_la conf\_16

|   |               |               |               |
|---|---------------|---------------|---------------|
| C | -5.8528468508 | -0.8767026667 | 2.6097247782  |
| C | -5.9175756005 | 0.5068038721  | 2.7156381648  |
| C | -4.7606137072 | 1.2989111158  | 2.6406352896  |
| C | -3.5392272393 | 0.6883093806  | 2.447353547   |
| C | -3.4477874955 | -0.7106210503 | 2.3168620327  |
| C | -4.6184055071 | -1.5002434241 | 2.4189134003  |
| O | -4.5873018038 | -2.8281153889 | 2.3374021005  |
| O | -7.0856368706 | 1.159287899   | 2.9006034389  |
| C | -2.2465632717 | 1.4518824365  | 2.4192222262  |
| C | -1.2389881394 | 0.7825749785  | 1.4928742156  |
| O | -1.0809386375 | -0.6075431089 | 1.8529738937  |
| C | -2.1656468156 | -1.3630466663 | 2.0850066458  |
| O | -2.0194521691 | -2.5818506176 | 2.0967614087  |
| C | -1.571453685  | 0.9383520104  | 0.014724098   |
| C | -0.5264360684 | 0.3798994801  | -0.9508007093 |
| C | -0.635791394  | -1.1206469858 | -1.2075801887 |
| C | 0.3419274161  | -1.5483362957 | -2.3001397796 |
| C | 0.1347030379  | -0.6924865678 | -3.547425869  |
| C | 0.1827468848  | 0.8009710494  | -3.2151883189 |
| O | -0.7169651403 | 1.1126858911  | -2.1550655405 |
| C | 1.5915334263  | 1.322444758   | -2.9418168749 |
| H | -6.7416128076 | -1.495891786  | 2.6800041289  |
| H | -4.8513764333 | 2.374290987   | 2.7402605484  |
| H | -3.6320071958 | -3.0808972748 | 2.2492354678  |
| H | -7.8070127752 | 0.5171368687  | 2.9332859276  |
| H | -1.8272298436 | 1.4821542161  | 3.4330360358  |
| H | -2.4060264626 | 2.4880577757  | 2.1080204313  |
| H | -0.2452991909 | 1.1994033456  | 1.6780102629  |
| H | -1.6448932501 | 2.0125461366  | -0.1885810116 |
| H | -2.555059524  | 0.5087885995  | -0.2061471744 |
| H | 0.4764145736  | 0.5967858181  | -0.5441585879 |
| H | -1.6627743876 | -1.3383523094 | -1.529871505  |
| H | -0.4582715609 | -1.6741658554 | -0.2819352008 |
| H | 0.2053878333  | -2.6080337673 | -2.539543484  |
| H | 1.3712937336  | -1.4462927338 | -1.9334163267 |
| H | 0.8790679807  | -0.9249377613 | -4.3175154056 |
| H | -0.8507198383 | -0.9171547543 | -3.9725899585 |
| H | -0.2207127375 | 1.3632179267  | -4.0639974818 |
| H | 1.5480128375  | 2.3742526296  | -2.646086418  |
| H | 2.2027598561  | 1.2455896335  | -3.8463414578 |
| H | 2.1037788231  | 0.7669722056  | -2.1513467499 |

calc\_1a conf\_17

|   |               |               |               |
|---|---------------|---------------|---------------|
| C | -5.9467511321 | -0.2222408025 | 2.9318451372  |
| C | -6.095565431  | 0.0277006989  | 1.5731809724  |
| C | -5.0324392026 | -0.1595262301 | 0.6773458514  |
| C | -3.8117626376 | -0.5875085188 | 1.1594486027  |
| C | -3.6288366603 | -0.8274008321 | 2.5337928143  |
| C | -4.7178654558 | -0.6650673312 | 3.4235202661  |
| O | -4.6123965558 | -0.920974638  | 4.7256579702  |
| O | -7.2644059365 | 0.4558153582  | 1.0459138802  |
| C | -2.6379729261 | -0.845974965  | 0.2568540567  |
| C | -1.3415102975 | -0.5633291333 | 0.9913867048  |
| O | -1.290186581  | -1.3116544889 | 2.2296214691  |
| C | -2.3453096765 | -1.2855250369 | 3.0533635708  |
| O | -2.1860330973 | -1.6655999609 | 4.2096215134  |
| C | -0.0528007369 | -0.9431933285 | 0.274302488   |
| C | 0.2331373776  | -0.1958065441 | -1.0341523584 |
| C | -0.3074575899 | -0.8699979747 | -2.294310351  |
| C | -0.0113900054 | -0.0033050431 | -3.5171754237 |
| C | -0.5362545186 | 1.4138716106  | -3.2914436356 |
| C | -0.023916547  | 2.0060948022  | -1.9761369363 |
| O | -0.2860706319 | 1.1182134475  | -0.8905684098 |
| C | 1.4388988078  | 2.4383601176  | -2.0208699611 |
| H | -6.7696214988 | -0.0951375178 | 3.6283196561  |
| H | -5.1911539695 | 0.0361927114  | -0.3768111352 |
| H | -3.6962707622 | -1.2762889215 | 4.8657381879  |
| H | -7.9153199912 | 0.5507759067  | 1.7536249152  |
| H | -2.6893455107 | -0.206099947  | -0.62649017   |
| H | -2.6520916288 | -1.8906125597 | -0.0827035802 |
| H | -1.3077666676 | 0.4989957969  | 1.2508708014  |
| H | -0.0525994886 | -2.022596958  | 0.0845816068  |
| H | 0.7564846813  | -0.7518990657 | 0.9853137818  |
| H | 1.3280739619  | -0.1444795748 | -1.1431657527 |
| H | -1.3884849925 | -1.0244472265 | -2.2045630974 |
| H | 0.1515439016  | -1.8598823909 | -2.3980746941 |
| H | -0.4642787925 | -0.4356383266 | -4.4154663583 |
| H | 1.0711216333  | 0.017342786   | -3.6966243446 |
| H | -0.2632474724 | 2.071824456   | -4.1239382381 |
| H | -1.6320059429 | 1.3857657332  | -3.2515613272 |
| H | -0.6235586143 | 2.8888120831  | -1.7315959152 |
| H | 1.5633788354  | 3.261531834   | -2.7310189182 |
| H | 2.1131651981  | 1.6344927533  | -2.3287304339 |
| H | 1.7538665547  | 2.7873972213  | -1.0339032055 |

calc\_1a conf\_18

|   |               |               |              |
|---|---------------|---------------|--------------|
| C | -5.9614232783 | -0.1246225212 | 3.0356710715 |
| C | -6.2929897444 | -0.320554015  | 1.7008087831 |
| C | -5.331100221  | -0.7249354769 | 0.7623518646 |
| C | -4.0281378623 | -0.9169068504 | 1.1749850493 |
| C | -3.6618043994 | -0.7052424847 | 2.5168999578 |
| C | -4.6473591942 | -0.32939477   | 3.4602722764 |
| O | -4.3650009828 | -0.161917846  | 4.7502039807 |
| O | -7.5505314155 | -0.1396578066 | 1.2392804281 |
| C | -2.94310813   | -1.3856299967 | 0.2474282861 |
| C | -1.6091844758 | -0.7878748842 | 0.6622088773 |
| O | -1.3409661595 | -1.1377710696 | 2.0417960674 |
| C | -2.288618742  | -0.9165756802 | 2.96263542   |
| O | -1.9601988129 | -0.9191906011 | 4.1450149802 |

|   |               |               |               |
|---|---------------|---------------|---------------|
| C | -0.4004307954 | -1.2770945746 | -0.1287867228 |
| C | 0.0143686653  | -0.3940386178 | -1.3032624243 |
| C | -1.0022079756 | -0.256059154  | -2.4339468916 |
| C | -0.458018345  | 0.6864900286  | -3.506291062  |
| C | -0.0737131817 | 2.0200174222  | -2.8664728969 |
| C | 0.8636279996  | 1.8275985511  | -1.6712151531 |
| O | 0.3259945958  | 0.8763934415  | -0.7546073799 |
| C | 2.3000208185  | 1.4923300598  | -2.0630697088 |
| H | -6.7045696185 | 0.1712357218  | 3.7695401818  |
| H | -5.6323348896 | -0.8799931054 | -0.2672622541 |
| H | -3.4115100325 | -0.4138331234 | 4.8615698384  |
| H | -8.1194564972 | 0.1364209751  | 1.9698408801  |
| H | -3.1755536186 | -1.1216533478 | -0.7869165971 |
| H | -2.8661932811 | -2.4808953023 | 0.2894023527  |
| H | -1.6537598933 | 0.3056729441  | 0.6142198289  |
| H | -0.5624643005 | -2.3024211256 | -0.4811484884 |
| H | 0.4432226778  | -1.3032624552 | 0.5663994399  |
| H | 0.9250588197  | -0.8476249981 | -1.7269692169 |
| H | -1.9345977678 | 0.1622790682  | -2.0355484724 |
| H | -1.2330661746 | -1.242565678  | -2.8527209634 |
| H | -1.2013859643 | 0.8451704091  | -4.294474214  |
| H | 0.4138004187  | 0.2278559378  | -3.9900464373 |
| H | 0.3933094799  | 2.6879232193  | -3.5986397381 |
| H | -0.9846403491 | 2.517720782   | -2.5129081237 |
| H | 0.8857512001  | 2.7554649631  | -1.0907534195 |
| H | 2.3719795188  | 0.6121610745  | -2.7080764755 |
| H | 2.8954852467  | 1.3061489832  | -1.1654423422 |
| H | 2.7467066621  | 2.3328319034  | -2.6029705823 |

calc\_1a conf\_19

|   |               |               |               |
|---|---------------|---------------|---------------|
| C | -5.841627879  | -0.1987831443 | 2.5892284915  |
| C | -5.4803007121 | 1.1341051437  | 2.4399827648  |
| C | -4.136546218  | 1.5124685478  | 2.2912999889  |
| C | -3.1608589211 | 0.5375042062  | 2.2834755146  |
| C | -3.5014001654 | -0.8220443399 | 2.4111130429  |
| C | -4.8571119479 | -1.1888869135 | 2.5866110139  |
| O | -5.2336278406 | -2.4548479614 | 2.7499036395  |
| O | -6.3926305738 | 2.1302521537  | 2.4367233846  |
| C | -1.6968605418 | 0.8581572079  | 2.1970774685  |
| C | -0.9413424688 | -0.2440449391 | 1.4660947051  |
| O | -1.2152238757 | -1.5241523115 | 2.0777567416  |
| C | -2.4784481091 | -1.8608813309 | 2.3819115081  |
| O | -2.7114164595 | -3.0383254174 | 2.6359631258  |
| C | -1.2199050234 | -0.343193173  | -0.0323416953 |
| C | -0.6455735938 | 0.8107908717  | -0.8693054476 |
| C | 0.8823650686  | 0.8183908079  | -0.9811976109 |
| C | 1.3853105513  | -0.2842229982 | -1.9103424458 |
| C | 0.6612436893  | -0.1961012716 | -3.2513494166 |
| C | -0.8507551636 | -0.1954902131 | -3.0477702025 |
| O | -1.2407575973 | 0.8470811437  | -2.1584612561 |
| C | -1.6236181647 | 0.0346784137  | -4.3312428802 |
| H | -6.8771601453 | -0.4971148397 | 2.7194303712  |
| H | -3.8938395997 | 2.5639636248  | 2.1909053046  |
| H | -4.4006998274 | -2.9935708001 | 2.7699469322  |
| H | -7.2758987162 | 1.7526487623  | 2.5413895055  |
| H | -1.2882863843 | 0.9478532191  | 3.2117130062  |
| H | -1.533581913  | 1.8213498283  | 1.7060469507  |
| H | 0.1307253853  | -0.1188153741 | 1.633518704   |

|   |               |               |               |
|---|---------------|---------------|---------------|
| H | -0.8160768681 | -1.3034813844 | -0.3667792679 |
| H | -2.3012054357 | -0.3711069765 | -0.204909131  |
| H | -0.9668133052 | 1.7556372295  | -0.4170772547 |
| H | 1.3441380589  | 0.7377522273  | 0.0093531799  |
| H | 1.1813647169  | 1.7909159733  | -1.3895567647 |
| H | 1.2125343282  | -1.2705967551 | -1.4613185225 |
| H | 2.4678792713  | -0.1949091454 | -2.0485769515 |
| H | 0.944152539   | -1.028579554  | -3.9054170715 |
| H | 0.9430419677  | 0.7328279467  | -3.7638716208 |
| H | -1.1479535193 | -1.1682197112 | -2.6234506016 |
| H | -1.4013850899 | -0.7496212985 | -5.06050134   |
| H | -1.355289726  | 1.0021926872  | -4.7654991095 |
| H | -2.6985597907 | 0.0344198581  | -4.1344767536 |

calc\_1a conf\_20

|   |               |               |               |
|---|---------------|---------------|---------------|
| C | -5.8224991423 | -0.2662873471 | 2.5047814668  |
| C | -5.4949338161 | 0.9962516178  | 2.0277402624  |
| C | -4.1586447681 | 1.3714103267  | 1.8164549582  |
| C | -3.1558697407 | 0.4612093921  | 2.0789298663  |
| C | -3.4614021345 | -0.8322648325 | 2.5419042062  |
| C | -4.8105120217 | -1.1893926705 | 2.7767974088  |
| O | -5.1558275184 | -2.3839539446 | 3.2505302608  |
| O | -6.4350829205 | 1.9264230377  | 1.7506906334  |
| C | -1.6986821384 | 0.7969840914  | 1.9461712391  |
| C | -0.899046535  | -0.4290493967 | 1.5256738066  |
| O | -1.1492904679 | -1.5216660971 | 2.4370311968  |
| C | -2.4089861456 | -1.8100399419 | 2.7975583763  |
| O | -2.6165007842 | -2.8889623658 | 3.3432091085  |
| C | -1.1508990009 | -0.9187084859 | 0.1026667852  |
| C | -0.7433326412 | 0.0450974895  | -1.0073980784 |
| C | 0.7394450608  | 0.411647889   | -1.0048296368 |
| C | 1.0939698173  | 1.2252813358  | -2.2490588125 |
| C | 0.6313578422  | 0.4886322283  | -3.5043059    |
| C | -0.8454562225 | 0.0977078276  | -3.4110938421 |
| O | -1.0943573553 | -0.6240470209 | -2.2080058045 |
| C | -1.8060307103 | 1.270306718   | -3.5905903138 |
| H | -6.8525328035 | -0.5579186355 | 2.6844377079  |
| H | -3.942564549  | 2.3714873153  | 1.4588253466  |
| H | -4.3089007885 | -2.8708537067 | 3.4249174348  |
| H | -7.3095093247 | 1.5581763331  | 1.9335934784  |
| H | -1.3202697212 | 1.1447396399  | 2.9159398718  |
| H | -1.5435323534 | 1.6127353962  | 1.2347159866  |
| H | 0.1659482541  | -0.2328628131 | 1.6655160471  |
| H | -2.212578397  | -1.1526602768 | -0.0267088279 |
| H | -0.5989919023 | -1.8541756481 | -0.0356749457 |
| H | -1.3346611758 | 0.9714777464  | -0.9214045023 |
| H | 1.3263136173  | -0.5158614974 | -0.9864593742 |
| H | 0.991768669   | 0.975540097   | -0.0990435827 |
| H | 2.1729254753  | 1.4071783284  | -2.2915506409 |
| H | 0.617244381   | 2.2120917594  | -2.1900006504 |
| H | 0.8010562566  | 1.0947328404  | -4.4012132058 |
| H | 1.2214477555  | -0.4283792148 | -3.6168856542 |
| H | -1.0649231149 | -0.6344898889 | -4.1948833576 |
| H | -2.8348354499 | 0.9348406848  | -3.4351672912 |
| H | -1.7246412879 | 1.6691726279  | -4.6063845523 |
| H | -1.6081821973 | 2.0934490618  | -2.8984264755 |

calc\_1a conf\_21

|   |               |               |               |
|---|---------------|---------------|---------------|
| C | -5.8695402111 | -0.1997215474 | 3.2145434085  |
| C | -5.7512769287 | 1.0981961222  | 2.7334596497  |
| C | -4.624316131  | 1.5049160121  | 2.0031784173  |
| C | -3.6089986816 | 0.5987042017  | 1.7731338859  |
| C | -3.6936004353 | -0.7161210332 | 2.2676425543  |
| C | -4.8501718641 | -1.123091694  | 2.9749537106  |
| O | -5.0031746974 | -2.3659427309 | 3.4259758875  |
| O | -6.7104841541 | 2.0291499821  | 2.935981009   |
| C | -2.3898337737 | 0.9347353351  | 0.9632941518  |
| C | -1.195708564  | 0.1584002931  | 1.4881190889  |
| O | -1.4764433512 | -1.2557101662 | 1.4927005816  |
| C | -2.6248805554 | -1.6826565651 | 2.0298517971  |
| O | -2.7324507526 | -2.8764241631 | 2.2954224361  |
| C | 0.1110205832  | 0.3631438099  | 0.7291486564  |
| C | 0.0327809098  | 0.4671819469  | -0.7893327933 |
| C | 1.4224634663  | 0.6162165506  | -1.4070093283 |
| C | 1.3392707303  | 0.5868255851  | -2.9309827447 |
| C | 0.5866921829  | -0.6642349093 | -3.3785566251 |
| C | -0.7708989636 | -0.7843113665 | -2.6818772397 |
| O | -0.6219475384 | -0.6935747897 | -1.2662407266 |
| C | -1.8198016378 | 0.1885371946  | -3.2150065649 |
| H | -6.7462441672 | -0.5252615089 | 3.7657142498  |
| H | -4.5755634027 | 2.5223197274  | 1.6325245261  |
| H | -4.2127212531 | -2.8759380653 | 3.1074233214  |
| H | -7.4305324492 | 1.6356821218  | 3.4461799117  |
| H | -2.1809744709 | 2.008602688   | 0.9952772856  |
| H | -2.5570886729 | 0.6582031325  | -0.0840056569 |
| H | -1.0276926961 | 0.4404534016  | 2.5362736175  |
| H | 0.7778058909  | -0.4618448178 | 1.0011885994  |
| H | 0.5744026239  | 1.2849531499  | 1.1000591965  |
| H | -0.5566782549 | 1.3617840875  | -1.0544287392 |
| H | 2.0484805968  | -0.214361197  | -1.0565087121 |
| H | 1.8860830084  | 1.5454905373  | -1.0561172794 |
| H | 2.3422059517  | 0.6042818348  | -3.3702663529 |
| H | 0.8284223735  | 1.4888539469  | -3.290943878  |
| H | 0.4473119372  | -0.6736373231 | -4.4652931958 |
| H | 1.1821906475  | -1.5481798153 | -3.1218090481 |
| H | -1.1523488533 | -1.7993175981 | -2.8305248082 |
| H | -2.7571142532 | 0.0679301389  | -2.6648596134 |
| H | -2.0192872766 | -0.0166402289 | -4.2713186923 |
| H | -1.5093569124 | 1.2344077197  | -3.1369639438 |

calc\_1a conf\_22

|   |               |               |              |
|---|---------------|---------------|--------------|
| C | -5.5704414552 | 0.1482927901  | 1.6128158626 |
| C | -5.2346277469 | 1.4568986853  | 1.9354385566 |
| C | -3.9179088812 | 1.8086117732  | 2.2671213414 |
| C | -2.9402160523 | 0.8327441474  | 2.2592901192 |
| C | -3.2492679948 | -0.4946341883 | 1.9227814866 |
| C | -4.5850650141 | -0.8408920397 | 1.6091515287 |
| O | -4.9426661917 | -2.0866015221 | 1.3087841265 |
| O | -6.151470946  | 2.4507859228  | 1.9531276032 |
| C | -1.5258852258 | 1.1138962282  | 2.6742241541 |
| C | -0.51519802   | 0.2040453574  | 1.9809940664 |
| O | -0.9294348379 | -1.1749283334 | 2.0204034031 |
| C | -2.2146988672 | -1.5199319438 | 1.8667758234 |
| O | -2.4660248898 | -2.712429649  | 1.7159818931 |
| C | -0.0933132179 | 0.6159565013  | 0.568988925  |



|   |               |               |               |
|---|---------------|---------------|---------------|
| C | -1.1662708349 | 0.6794678882  | -0.526469378  |
| C | -0.6524172109 | 1.3483528703  | -1.8061806564 |
| C | 0.2948651659  | 0.4350501047  | -2.5803922745 |
| C | -0.3832602883 | -0.9117860597 | -2.8181608311 |
| C | -0.8867372102 | -1.5111332504 | -1.5080152556 |
| O | -1.7322867935 | -0.5908394782 | -0.8186392726 |
| C | -1.7063557114 | -2.7698238796 | -1.712409705  |
| H | -6.5889037754 | -0.1334757566 | 1.3643539404  |
| H | -3.6960666695 | 2.8368147685  | 2.5289764521  |
| H | -4.1219750337 | -2.6380396599 | 1.393345295   |
| H | -7.0133922323 | 2.0895110477  | 1.708534045   |
| H | -1.4452525087 | 0.9573816509  | 3.7575059564  |
| H | -1.261588008  | 2.1596690322  | 2.4900908903  |
| H | 0.3976933926  | 0.1999415295  | 2.5831935308  |
| H | 0.3574889134  | 1.6124954902  | 0.6608435271  |
| H | 0.7186752227  | -0.0520780316 | 0.2649847045  |
| H | -2.0112373653 | 1.2646510003  | -0.1502120192 |
| H | -0.1757761199 | 2.3050898807  | -1.5641745129 |
| H | -1.5209171799 | 1.5727699201  | -2.4363303088 |
| H | 1.2274660681  | 0.2880625548  | -2.0205239155 |
| H | 0.5762435235  | 0.9001038458  | -3.5312607359 |
| H | 0.3015485462  | -1.6177068708 | -3.3015434532 |
| H | -1.2406897739 | -0.777836682  | -3.4904634874 |
| H | -0.0211543193 | -1.7541231319 | -0.872282649  |
| H | -2.5910788986 | -2.5492265914 | -2.3172688224 |
| H | -2.0309966668 | -3.1707169254 | -0.7504326576 |
| H | -1.1124048912 | -3.530388996  | -2.2279472963 |

calc\_1a conf\_23

|   |               |               |               |
|---|---------------|---------------|---------------|
| C | -5.8153531164 | -0.905058447  | 2.271835407   |
| C | -5.7580109645 | 0.1913598777  | 1.4209133233  |
| C | -4.5375083458 | 0.813473724   | 1.1150567706  |
| C | -3.3726950571 | 0.3155667941  | 1.6632929163  |
| C | -3.400773544  | -0.8073597564 | 2.5116457839  |
| C | -4.6406550628 | -1.4075330937 | 2.8358336117  |
| O | -4.7306165157 | -2.4444868288 | 3.6652766558  |
| O | -6.8656122051 | 0.7182879519  | 0.8526274522  |
| C | -2.03114255   | 0.9491122473  | 1.4443900304  |
| C | -0.9296270483 | -0.0979429928 | 1.4447062371  |
| O | -0.9914677909 | -0.8759742439 | 2.6646625858  |
| C | -2.171784451  | -1.3502187765 | 3.0847004765  |
| O | -2.1684605867 | -2.2215679076 | 3.9497110479  |
| C | -0.900345281  | -1.0814962783 | 0.2724181961  |
| C | -0.6402327485 | -0.4629872253 | -1.1090983538 |
| C | -1.9026010596 | -0.1416323857 | -1.9076795971 |
| C | -1.5353830357 | 0.5447740784  | -3.2225184865 |
| C | -0.6371091524 | 1.7496360429  | -2.9499621774 |
| C | 0.5743925899  | 1.3697101343  | -2.0953209734 |
| O | 0.1570552967  | 0.696185716   | -0.9086812024 |
| C | 1.6432379673  | 0.5862625462  | -2.8518654454 |
| H | -6.7576656412 | -1.380298544  | 2.5259914266  |
| H | -4.5361859046 | 1.6799675986  | 0.4637726244  |
| H | -3.8106299829 | -2.6135730542 | 3.998683564   |
| H | -7.6389161775 | 0.2152647498  | 1.1400168451  |
| H | -1.832016968  | 1.6540061766  | 2.2622372501  |
| H | -1.9887678852 | 1.5222747457  | 0.5169721813  |
| H | 0.0375555522  | 0.3991039162  | 1.501179726   |
| H | -0.1070564921 | -1.7974858833 | 0.5071466294  |

|   |               |               |               |
|---|---------------|---------------|---------------|
| H | -1.8371066076 | -1.6487812351 | 0.2384854844  |
| H | -0.0670557174 | -1.1989146247 | -1.6945780843 |
| H | -2.5661175205 | 0.5042574259  | -1.321553159  |
| H | -2.4525682217 | -1.0711884266 | -2.0937516259 |
| H | -2.4376733702 | 0.85810904    | -3.7578500639 |
| H | -1.0212642268 | -0.1700971175 | -3.8776117069 |
| H | -1.2137639821 | 2.5097089438  | -2.4089849424 |
| H | -0.3004112846 | 2.2092689438  | -3.8858736645 |
| H | 1.0389352598  | 2.2860670838  | -1.7168866618 |
| H | 2.0777165001  | 1.2106871917  | -3.6384325372 |
| H | 1.2526366364  | -0.3172581925 | -3.3276237567 |
| H | 2.4430486956  | 0.2917700852  | -2.1672837874 |

calc\_1a conf\_24

|   |               |               |               |
|---|---------------|---------------|---------------|
| C | -5.9792167008 | -0.7194278962 | 3.3468630007  |
| C | -6.2107189118 | 0.5458894058  | 2.8218163626  |
| C | -5.2654057462 | 1.1771502779  | 1.9988959048  |
| C | -4.0777394905 | 0.5327889793  | 1.7188440648  |
| C | -3.8088662167 | -0.7413464428 | 2.2553796434  |
| C | -4.7847328884 | -1.3809654497 | 3.0585682217  |
| O | -4.6042441564 | -2.6023860332 | 3.5553536237  |
| O | -7.3500835578 | 1.2284603928  | 3.067969247   |
| C | -3.035216657  | 1.1261921761  | 0.8135518385  |
| C | -1.6515227337 | 0.6622939547  | 1.2415051303  |
| O | -1.5908844085 | -0.7774579807 | 1.3137024253  |
| C | -2.5620366301 | -1.4382140346 | 1.963117594   |
| O | -2.3560366002 | -2.6084360836 | 2.2673321665  |
| C | -0.4904056578 | 1.1257853984  | 0.3657541965  |
| C | -0.1405464005 | 0.279276469   | -0.8582578547 |
| C | -1.2311319139 | 0.1385054395  | -1.9152808192 |
| C | -0.6826310819 | -0.5721934792 | -3.1527833546 |
| C | 0.5792810596  | 0.1287292629  | -3.648596838  |
| C | 1.601850118   | 0.2991124949  | -2.5223897787 |
| O | 1.0005658813  | 0.9357094086  | -1.399152485  |
| C | 2.3175825164  | -0.9932705527 | -2.1383138841 |
| H | -6.7126280318 | -1.2206646646 | 3.9706272091  |
| H | -5.4886016026 | 2.1593179216  | 1.5984918667  |
| H | -3.7383515745 | -2.9263661416 | 3.1960740619  |
| H | -7.9192995463 | 0.7004886761  | 3.6432701656  |
| H | -3.0696171183 | 2.2192822028  | 0.8493239916  |
| H | -3.2349851712 | 0.8355239395  | -0.2236290088 |
| H | -1.484002271  | 1.033936584   | 2.2606762776  |
| H | -0.6879179564 | 2.1529126433  | 0.0378647438  |
| H | 0.4180563466  | 1.1658946181  | 0.9738117743  |
| H | 0.1355783838  | -0.7253669682 | -0.5099168826 |
| H | -1.5951403698 | 1.1372900217  | -2.1909645294 |
| H | -2.0732801226 | -0.4274887808 | -1.5048644088 |
| H | -1.4389966855 | -0.5973759911 | -3.9443327778 |
| H | -0.4634118431 | -1.6176065744 | -2.9026091294 |
| H | 0.3116726138  | 1.1247025784  | -4.0214421738 |
| H | 1.0312604921  | -0.4179533847 | -4.4838958103 |
| H | 2.3626497218  | 1.0177855332  | -2.844964136  |
| H | 2.9813542745  | -0.8115435948 | -1.2888165388 |
| H | 2.9233470176  | -1.3504607146 | -2.9769335079 |
| H | 1.62845362    | -1.7965036111 | -1.8636495924 |

calc\_1a conf\_25

|   |               |               |               |
|---|---------------|---------------|---------------|
| C | -5.68044338   | -0.4532429345 | 2.2736636696  |
| C | -5.5480286316 | 0.8250336917  | 2.8004363497  |
| C | -4.2894487515 | 1.4316522988  | 2.9319453106  |
| C | -3.1648945766 | 0.7457578627  | 2.5189520017  |
| C | -3.2736124414 | -0.5424249857 | 1.9627671609  |
| C | -4.5450752368 | -1.1537121247 | 1.8607988164  |
| O | -4.7013887219 | -2.3857614718 | 1.3817377183  |
| O | -6.6140155437 | 1.5454838309  | 3.2162236229  |
| C | -1.7768167134 | 1.3018722149  | 2.6737671881  |
| C | -0.8770814493 | 0.7967885583  | 1.5531056806  |
| O | -0.9107328955 | -0.6423394063 | 1.5068997218  |
| C | -2.0916802617 | -1.2759116064 | 1.5193195708  |
| O | -2.1172333825 | -2.4588192212 | 1.1988481451  |
| C | -1.2185040546 | 1.4351204079  | 0.2041939693  |
| C | -0.6320835718 | 0.7779589098  | -1.0433813744 |
| C | 0.8439487523  | 0.3995185775  | -0.9443236081 |
| C | 1.2815812196  | -0.3350293802 | -2.2099205203 |
| C | 0.3561347944  | -1.5266985445 | -2.4494028156 |
| C | -1.114461144  | -1.102782469  | -2.4730154276 |
| O | -1.4462484479 | -0.3513382341 | -1.3092400126 |
| C | -1.5252332604 | -0.3760788375 | -3.7514327005 |
| H | -6.6490838141 | -0.9347132374 | 2.1827320235  |
| H | -4.2262411451 | 2.4257621393  | 3.359349733   |
| H | -3.788409127  | -2.7310656307 | 1.2010749564  |
| H | -7.4188516332 | 1.0297523803  | 3.075477754   |
| H | -1.3618810256 | 0.9807437209  | 3.6375692481  |
| H | -1.7901797284 | 2.3959973947  | 2.6785397155  |
| H | 0.166402709   | 1.0072991872  | 1.7980465973  |
| H | -0.8737675126 | 2.4752131794  | 0.2540362624  |
| H | -2.3044089825 | 1.4665195038  | 0.0682538038  |
| H | -0.7414414707 | 1.5051589533  | -1.8660143883 |
| H | 0.987953495   | -0.2591026198 | -0.0816817739 |
| H | 1.4460324215  | 1.3025668766  | -0.7851329788 |
| H | 2.3188772977  | -0.6736004484 | -2.1168992169 |
| H | 1.2545275117  | 0.3503059603  | -3.0670073075 |
| H | 0.6069683795  | -2.0396541937 | -3.384642764  |
| H | 0.4881399889  | -2.2483700593 | -1.6353844605 |
| H | -1.7365251741 | -1.998299395  | -2.3806233893 |
| H | -0.9136016609 | 0.5079218438  | -3.9530556563 |
| H | -2.5686650026 | -0.0578526052 | -3.678750321  |
| H | -1.4295278282 | -1.0456300873 | -4.6118303045 |

calc\_1a conf\_26

|   |               |               |               |
|---|---------------|---------------|---------------|
| C | -5.4276304476 | 0.0479316898  | 1.3697794818  |
| C | -5.1186574388 | 1.3877192406  | 1.5706642129  |
| C | -3.836734173  | 1.7834389604  | 1.9778173302  |
| C | -2.8653372106 | 0.820193832   | 2.173917798   |
| C | -3.1428572909 | -0.5384098105 | 1.9534833261  |
| C | -4.4476313557 | -0.9258046545 | 1.5671525989  |
| O | -4.7739218738 | -2.2017414873 | 1.3635851577  |
| O | -6.0306822251 | 2.3700500968  | 1.39250661    |
| C | -1.5065523776 | 1.1574962024  | 2.7121951104  |
| C | -0.4304203024 | 0.1652447773  | 2.2790476493  |
| O | -0.8666378422 | -1.1972518725 | 2.4331665221  |
| C | -2.1180987688 | -1.5635032746 | 2.1384528601  |
| O | -2.3655365848 | -2.7636532059 | 2.0797377522  |
| C | 0.1903519473  | 0.4040875044  | 0.9029286517  |
| C | -0.668701723  | 0.3234613341  | -0.3568689517 |

|   |               |               |               |
|---|---------------|---------------|---------------|
| C | 0.0817380405  | 0.9409672784  | -1.539017758  |
| C | -0.6310290238 | 0.6586535808  | -2.8571716061 |
| C | -0.8557121972 | -0.8438976373 | -2.9925937961 |
| C | -1.6005906597 | -1.406183706  | -1.7806705811 |
| O | -0.9340912045 | -1.0543928721 | -0.5668101247 |
| C | -3.0824040557 | -1.0472427905 | -1.7574608351 |
| H | -6.4206298284 | -0.2685388338 | 1.0660058801  |
| H | -3.6381409146 | 2.8356416757  | 2.1466178862  |
| H | -3.965395224  | -2.7320749958 | 1.5997408257  |
| H | -6.8705941887 | 1.9762084159  | 1.1223701343  |
| H | -1.5633648708 | 1.1511821171  | 3.8082635323  |
| H | -1.2078392518 | 2.1695182971  | 2.4222467186  |
| H | 0.3940862413  | 0.2365572351  | 2.993883564   |
| H | 1.0063016247  | -0.3158735601 | 0.7771360032  |
| H | 0.6496862475  | 1.400029717   | 0.9453361518  |
| H | -1.6127026285 | 0.8727712995  | -0.2151144622 |
| H | 1.0922932701  | 0.5122482237  | -1.5722997774 |
| H | 0.1917224399  | 2.0190990489  | -1.3735793489 |
| H | -0.041618796  | 1.03658795    | -3.6992729112 |
| H | -1.5897854454 | 1.1916009322  | -2.8836977229 |
| H | -1.4106209874 | -1.081752204  | -3.9066739691 |
| H | 0.1174259754  | -1.3442726165 | -3.0653509564 |
| H | -1.5222288219 | -2.4976887377 | -1.7994802641 |
| H | -3.5588882705 | -1.3732781557 | -2.6876902737 |
| H | -3.2551731624 | 0.0278555582  | -1.6550632104 |
| H | -3.5813966411 | -1.5529845527 | -0.9292192084 |

calc\_la conf\_27

|   |               |               |               |
|---|---------------|---------------|---------------|
| C | -5.5098594803 | -0.2213091951 | 1.4827671242  |
| C | -5.2544179095 | 1.1428858401  | 1.5453841515  |
| C | -3.9865838125 | 1.630095684   | 1.8967073734  |
| C | -2.9720468988 | 0.7338743277  | 2.1730889227  |
| C | -3.2010056159 | -0.6510653808 | 2.1061496358  |
| C | -4.4917367573 | -1.1311279824 | 1.7729539389  |
| O | -4.7733609347 | -2.4302604908 | 1.7224010454  |
| O | -6.2052423695 | 2.0651909762  | 1.2799040183  |
| C | -1.6139421406 | 1.1832581144  | 2.628412193   |
| C | -0.5032775295 | 0.1904732567  | 2.2923994875  |
| O | -0.8920830366 | -1.166660292  | 2.5973721763  |
| C | -2.1373153588 | -1.6083756758 | 2.3911737085  |
| O | -2.3335392286 | -2.817793143  | 2.4663798909  |
| C | 0.126192383   | 0.2454001863  | 0.9006982848  |
| C | -0.7419928577 | 0.0301155522  | -0.3393271181 |
| C | -1.3921126716 | 1.3002729008  | -0.8824582952 |
| C | -2.1000030648 | 1.0151244902  | -2.2057176093 |
| C | -1.1298520343 | 0.3554649064  | -3.1830270386 |
| C | -0.4424387225 | -0.8600842533 | -2.5557430568 |
| O | 0.1497132757  | -0.5111518948 | -1.3073943456 |
| C | -1.3440595836 | -2.0870699496 | -2.4430353625 |
| H | -6.4913869411 | -0.6062302655 | 1.2245476197  |
| H | -3.8306209602 | 2.701551305   | 1.9500138995  |
| H | -3.9470563519 | -2.9052023015 | 2.0027668109  |
| H | -7.0309821083 | 1.6156083489  | 1.0568868385  |
| H | -1.6459072843 | 1.3080201506  | 3.7183378877  |
| H | -1.3625642968 | 2.1625687913  | 2.2103923558  |
| H | 0.3172147939  | 0.3668214476  | 2.9926506205  |
| H | 0.8914347268  | -0.5365315276 | 0.880698236   |
| H | 0.6568997752  | 1.2017450837  | 0.8111891571  |

|   |               |               |               |
|---|---------------|---------------|---------------|
| H | -1.5275683669 | -0.7068844198 | -0.1168451074 |
| H | -0.6014826184 | 2.0458062265  | -1.0410315994 |
| H | -2.097233413  | 1.711751426   | -0.1543818085 |
| H | -2.497885376  | 1.9415040276  | -2.6335152338 |
| H | -2.9638027597 | 0.3633718597  | -2.0247185378 |
| H | -1.6393286161 | 0.0595954021  | -4.1070410725 |
| H | -0.3559364524 | 1.0815157561  | -3.459540653  |
| H | 0.4173850785  | -1.1355980961 | -3.1753490988 |
| H | -2.2754814009 | -1.8867970061 | -1.90610862   |
| H | -0.8170255689 | -2.8886172906 | -1.9187990264 |
| H | -1.6117075109 | -2.4472568953 | -3.4412417928 |

**Table S28.** Sampled and DFT geometry optimized conformers related to calc\_1b, with energy values (Hartree) and related % contribution on the final Boltzmann distribution for the three employed functional/basis set combinations.

| Conformer       | MPW1PW91/6-31g(d,p) |                                              | MPW1PW91/6-311+g(d,p) |                                              | B97-2/cc-pVTZ    |                                              |
|-----------------|---------------------|----------------------------------------------|-----------------------|----------------------------------------------|------------------|----------------------------------------------|
|                 | Energy (Hartree)    | % contribution on the Boltzmann distribution | Energy (Hartree)      | % contribution on the Boltzmann distribution | Energy (Hartree) | % contribution on the Boltzmann distribution |
| calc_1b conf_1  | -997.7082456        | 19.24%                                       | -997.9430329          | 22.99%                                       | -997.9016822     | 22.15%                                       |
| calc_1b conf_2  | -997.7082366        | 19.06%                                       | -997.9426204          | 14.85%                                       | -997.9010254     | 11.05%                                       |
| calc_1b conf_3  | -997.7080968        | 16.44%                                       | -997.9428186          | 18.32%                                       | -997.9017245     | 23.16%                                       |
| calc_1b conf_4  | -997.7075007        | 8.74%                                        | -997.9415396          | 4.73%                                        | -997.9000598     | 3.97%                                        |
| calc_1b conf_5  | -997.7072530        | 6.73%                                        | -997.9418359          | 6.47%                                        | -997.9003408     | 5.35%                                        |
| calc_1b conf_6  | -997.7072304        | 6.57%                                        | -997.9422580          | 10.12%                                       | -997.9012476     | 13.98%                                       |
| calc_1b conf_7  | -997.7069103        | 4.68%                                        | -997.9416668          | 5.41%                                        | -997.8997560     | 2.88%                                        |
| calc_1b conf_8  | -997.7068459        | 4.37%                                        | -997.9414214          | 4.17%                                        | -997.8997007     | 2.72%                                        |
| calc_1b conf_9  | -997.7066271        | 3.47%                                        | -997.9406073          | 1.76%                                        | -997.8995792     | 2.39%                                        |
| calc_1b conf_10 | -997.7064987        | 3.03%                                        | -997.9413636          | 3.92%                                        | -997.9004836     | 6.22%                                        |
| calc_1b conf_11 | -997.7064751        | 2.95%                                        | -997.9409618          | 2.56%                                        | -997.8994905     | 2.17%                                        |
| calc_1b conf_12 | -997.7056865        | 1.28%                                        | -997.9399959          | 0.92%                                        | -997.8980080     | 0.45%                                        |
| calc_1b conf_13 | -997.7052806        | 0.83%                                        | -997.9402889          | 1.26%                                        | -997.8986986     | 0.94%                                        |
| calc_1b conf_14 | -997.7045734        | 0.39%                                        | -997.9389238          | 0.30%                                        | -997.8970238     | 0.16%                                        |
| calc_1b conf_15 | -997.7045361        | 0.38%                                        | -997.9385410          | 0.20%                                        | -997.8965329     | 0.09%                                        |
| calc_1b conf_16 | -997.7044740        | 0.35%                                        | -997.9390994          | 0.36%                                        | -997.8978334     | 0.38%                                        |
| calc_1b conf_17 | -997.7043919        | 0.32%                                        | -997.9389223          | 0.30%                                        | -997.8977294     | 0.34%                                        |
| calc_1b conf_18 | -997.7043755        | 0.32%                                        | -997.9392081          | 0.40%                                        | -997.8978188     | 0.37%                                        |
| calc_1b conf_19 | -997.7041880        | 0.26%                                        | -997.9384613          | 0.18%                                        | -997.8968367     | 0.13%                                        |
| calc_1b conf_20 | -997.7035032        | 0.13%                                        | -997.9385881          | 0.21%                                        | -997.8976405     | 0.31%                                        |
| calc_1b conf_21 | -997.7034597        | 0.12%                                        | -997.9377278          | 0.08%                                        | -997.8974459     | 0.25%                                        |
| calc_1b conf_22 | -997.7030853        | 0.08%                                        | -997.9380240          | 0.11%                                        | -997.8967727     | 0.12%                                        |
| calc_1b conf_23 | -997.7029295        | 0.07%                                        | -997.9378796          | 0.10%                                        | -997.8969067     | 0.14%                                        |
| calc_1b conf_24 | -997.7027131        | 0.05%                                        | -997.9376709          | 0.08%                                        | -997.8968085     | 0.13%                                        |
| calc_1b conf_25 | -997.7023620        | 0.04%                                        | -997.9373878          | 0.06%                                        | -997.8955501     | 0.03%                                        |
| calc_1b conf_26 | -997.7023246        | 0.04%                                        | -997.9373578          | 0.06%                                        | -997.8963432     | 0.08%                                        |
| calc_1b conf_27 | -997.7018829        | 0.02%                                        | -997.9369733          | 0.04%                                        | -997.8941580     | 0.01%                                        |

|                 |              |       |              |       |              |       |
|-----------------|--------------|-------|--------------|-------|--------------|-------|
| calc_1b conf_28 | -997.7011556 | 0.01% | -997.9360458 | 0.01% | -997.8944661 | 0.01% |
| calc_1b conf_29 | -997.7011477 | 0.01% | -997.9361415 | 0.02% | -997.8947181 | 0.01% |
| calc_1b conf_30 | -997.7009035 | 0.01% | -997.9359564 | 0.01% | -997.8943459 | 0.01% |
| calc_1b conf_31 | -997.6997696 | 0.00% | -997.9345213 | 0.00% | -997.8926399 | 0.00% |
| calc_1b conf_32 | -997.6993183 | 0.00% | -997.9344931 | 0.00% | -997.8923420 | 0.00% |
| calc_1b conf_33 | -997.6991047 | 0.00% | -997.9343415 | 0.00% | -997.8923284 | 0.00% |

**Table S29.** Cartesian coordinates of the optimized geometries for the conformers related to calc\_1b. The related energies and % contribution on the final Boltzmann distribution for the three employed functional/basis set combinations are reported in Table S28.

calc\_1b conf\_1

|   |               |               |               |
|---|---------------|---------------|---------------|
| C | -7.4862612556 | -1.2758579582 | -0.3769165576 |
| C | -7.1823774215 | -0.017648539  | -0.8819287549 |
| C | -5.9783307725 | 0.6260274706  | -0.5581920551 |
| C | -5.0746634381 | -0.0103853821 | 0.2681769084  |
| C | -5.3490086987 | -1.2939938063 | 0.7769069794  |
| C | -6.5805616351 | -1.9203705952 | 0.4668597494  |
| O | -6.9105385857 | -3.1142731991 | 0.954529194   |
| O | -8.0251622235 | 0.650075487   | -1.7003736322 |
| C | -3.7833178698 | 0.6319165625  | 0.6909127599  |
| C | -2.7218160544 | -0.4281933726 | 0.919217264   |
| O | -3.1928143206 | -1.4347005492 | 1.8417599496  |
| C | -4.4054086653 | -1.9748342259 | 1.6558125642  |
| O | -4.6700866987 | -3.0154227878 | 2.2501277223  |
| C | -1.4225460226 | 0.0834829537  | 1.5183882456  |
| C | -0.7388889097 | 1.159627862   | 0.6676232164  |
| C | 0.6548360216  | 1.5307483884  | 1.1806494653  |
| C | 1.6915760892  | 0.4639133764  | 0.8333349458  |
| C | 1.6264955337  | 0.146996986   | -0.6587818107 |
| C | 0.2034881525  | -0.2196199188 | -1.0673571878 |
| O | -0.7063020315 | 0.8186817493  | -0.7130068423 |
| C | 0.0472887211  | -0.4287440908 | -2.5603699455 |
| H | -8.4224335713 | -1.7731168843 | -0.6106126284 |
| H | -5.7820352982 | 1.6115268258  | -0.9643004927 |
| H | -6.1776260189 | -3.376778165  | 1.5698711867  |
| H | -8.8127342479 | 0.111410555   | -1.8528019778 |
| H | -3.4354523692 | 1.3299662559  | -0.0748022623 |
| H | -3.9372197348 | 1.2025810471  | 1.61724611    |
| H | -2.5185117914 | -0.930064206  | -0.0334808083 |
| H | -1.632298266  | 0.5028391382  | 2.5093942351  |
| H | -0.767286442  | -0.7779632292 | 1.6822045716  |
| H | -1.3644240536 | 2.0582701397  | 0.6957271171  |
| H | 0.6160421142  | 1.7075955037  | 2.2613360667  |
| H | 0.94686071    | 2.4765912787  | 0.7096842994  |
| H | 1.5076734018  | -0.4505885355 | 1.4113081966  |
| H | 2.6927797581  | 0.8080979956  | 1.11281811    |
| H | 2.3053318703  | -0.6739540877 | -0.9156105893 |
| H | 1.9388744515  | 1.024089345   | -1.2401662897 |
| H | -0.0809453327 | -1.148161503  | -0.5442932754 |
| H | 0.3145149308  | 0.4847481132  | -3.099483949  |
| H | -0.9873330576 | -0.6805013823 | -2.8072541843 |
| H | 0.694623032   | -1.2400146159 | -2.905155614  |

calc\_1b conf\_2

|   |               |               |               |
|---|---------------|---------------|---------------|
| C | -7.6455820726 | -0.8334521337 | 0.0468593176  |
| C | -7.2103107966 | -0.7227126526 | -1.268180886  |
| C | -5.8443633544 | -0.73689791   | -1.58788376   |
| C | -4.9157119853 | -0.8781456406 | -0.5764537345 |
| C | -5.3316786328 | -1.0131976675 | 0.7625865814  |
| C | -6.711907538  | -0.9646585681 | 1.075545581   |
| O | -7.1577995716 | -1.0412482894 | 2.3278700503  |
| O | -8.0729511872 | -0.5905741736 | -2.3002095653 |
| C | -3.4360043722 | -0.8570135486 | -0.8301230265 |



|   |               |               |               |
|---|---------------|---------------|---------------|
| C | -2.73054578   | -1.7413052392 | 0.1827118024  |
| O | -3.0715669874 | -1.3433688739 | 1.5288101463  |
| C | -4.3626059732 | -1.1561293366 | 1.8423578885  |
| O | -4.6639401875 | -1.1041170545 | 3.030855802   |
| C | -1.2100897095 | -1.7652104003 | 0.1188169023  |
| C | -0.4933904122 | -0.4558328407 | 0.4230096574  |
| C | 0.9980804176  | -0.6782860138 | 0.6656548276  |
| C | 1.7246396529  | 0.655133998   | 0.8255951025  |
| C | 1.4135279072  | 1.5618216193  | -0.3632874521 |
| C | -0.0943719622 | 1.696557693   | -0.5859798927 |
| O | -0.6973955093 | 0.4069833315  | -0.6905619732 |
| C | -0.7899348884 | 2.5816168825  | 0.4448668029  |
| H | -8.7002064216 | -0.8062753764 | 0.302457433   |
| H | -5.5448720097 | -0.6341687288 | -2.6244814294 |
| H | -6.3544267544 | -1.0664334379 | 2.9092559018  |
| H | -8.9772287364 | -0.5948242476 | -1.9598208917 |
| H | -3.2051242624 | -1.2070399501 | -1.8404301913 |
| H | -3.0448374839 | 0.1626282792  | -0.7571094336 |
| H | -3.0948802959 | -2.7700597565 | 0.0582349223  |
| H | -0.8656966407 | -2.5159180149 | 0.8383872353  |
| H | -0.9077108546 | -2.1080656491 | -0.877225172  |
| H | -0.9395448235 | -0.0137016239 | 1.3255117     |
| H | 1.4137776358  | -1.2257339138 | -0.1907104725 |
| H | 1.1352048471  | -1.3062202198 | 1.5531116471  |
| H | 2.8049147802  | 0.4958068277  | 0.9082521209  |
| H | 1.4106681273  | 1.1342296389  | 1.7612721964  |
| H | 1.8554518311  | 1.1277367699  | -1.268065904  |
| H | 1.8593838673  | 2.5538636771  | -0.2303103483 |
| H | -0.2651447408 | 2.1370768542  | -1.5738098336 |
| H | -0.6314596004 | 2.2441342899  | 1.4724912774  |
| H | -1.8671762878 | 2.6028602003  | 0.2588233021  |
| H | -0.4121892339 | 3.6061412003  | 0.3723057683  |

calc\_1b conf\_3

|   |               |               |               |
|---|---------------|---------------|---------------|
| C | -7.5365478045 | -1.2026820033 | -0.4196827823 |
| C | -7.0519101815 | -0.0779044448 | -1.0755216093 |
| C | -5.7919360579 | 0.4576302232  | -0.76886179   |
| C | -5.0154810511 | -0.1546565342 | 0.1942009745  |
| C | -5.474538399  | -1.3068793135 | 0.8594677661  |
| C | -6.7603835309 | -1.819513578  | 0.5629174393  |
| O | -7.2625784065 | -2.8796201181 | 1.1919433745  |
| O | -7.7642899893 | 0.558626108   | -2.0317609464 |
| C | -3.6723706015 | 0.3793544256  | 0.6054172497  |
| C | -2.7675155235 | -0.7598504465 | 1.0377162623  |
| O | -3.4052070596 | -1.54646078   | 2.0687023941  |
| C | -4.6667313823 | -1.957865255  | 1.8853625041  |
| O | -5.0922337437 | -2.8570677689 | 2.6040740256  |
| C | -1.4355641256 | -0.3322285762 | 1.6309232941  |
| C | -0.5485354205 | 0.4433364038  | 0.6679084888  |
| C | 0.8201435022  | 0.7542942999  | 1.2668042028  |
| C | 1.7209052271  | 1.4111803678  | 0.2234106454  |
| C | 1.7737068609  | 0.5417231529  | -1.0316626444 |
| C | 0.3716309679  | 0.2039696508  | -1.5453757604 |
| O | -0.426159303  | -0.3522841291 | -0.5015293993 |
| C | -0.3253205061 | 1.3710264265  | -2.2392459909 |
| H | -8.5169553751 | -1.6129850926 | -0.6404707422 |
| H | -5.4540860233 | 1.3430821539  | -1.2948767526 |
| H | -6.5979869287 | -3.1337534091 | 1.8839737194  |

|   |               |               |               |
|---|---------------|---------------|---------------|
| H | -8.6059879029 | 0.1010466979  | -2.157213588  |
| H | -3.2069358258 | 0.9213449962  | -0.2220618851 |
| H | -3.7914860969 | 1.0877564104  | 1.4369262704  |
| H | -2.5881720671 | -1.4209906309 | 0.1840733357  |
| H | -1.6183627359 | 0.2772408564  | 2.5234254585  |
| H | -0.908357991  | -1.2349051571 | 1.9569816664  |
| H | -1.0380238982 | 1.3988612625  | 0.4152205776  |
| H | 1.2722850616  | -0.1858183663 | 1.6071903731  |
| H | 0.7012640784  | 1.3973592186  | 2.1462039387  |
| H | 2.7291197948  | 1.5585013473  | 0.6242791908  |
| H | 1.336097969   | 2.4097350611  | -0.0197422804 |
| H | 2.2861351517  | -0.3974120653 | -0.7921230422 |
| H | 2.3498212768  | 1.0297732115  | -1.8256175929 |
| H | 0.4506881565  | -0.6144811481 | -2.2680892539 |
| H | 0.2279931942  | 1.6574555782  | -3.1387797585 |
| H | -0.4011425782 | 2.2580741182  | -1.6041964049 |
| H | -1.3349907316 | 1.0779868466  | -2.5403109284 |

calc\_lb conf\_4

|   |               |               |               |
|---|---------------|---------------|---------------|
| C | -7.6347482852 | -0.9970501824 | -0.0129540801 |
| C | -7.1438201099 | -0.4741826556 | -1.203040416  |
| C | -5.7686350624 | -0.279259466  | -1.4014178162 |
| C | -4.8862644622 | -0.6262554714 | -0.3984858924 |
| C | -5.3565567159 | -1.1769206691 | 0.809608557   |
| C | -6.7489873675 | -1.3395164641 | 1.0095745647  |
| O | -7.2508404475 | -1.8134627616 | 2.1479983941  |
| O | -7.9583598876 | -0.1234705307 | -2.222784462  |
| C | -3.4050220516 | -0.4079070735 | -0.5145558867 |
| C | -2.6663423138 | -1.4840242999 | 0.2618810248  |
| O | -3.1181668844 | -1.5168923779 | 1.6330282554  |
| C | -4.4370217333 | -1.5418388808 | 1.8805832471  |
| O | -4.8049489656 | -1.863585326  | 3.0058148323  |
| C | -1.1507118141 | -1.3546756531 | 0.3196635081  |
| C | -0.6244462848 | -0.0871160661 | 1.0069327275  |
| C | 0.8500811546  | -0.1893556516 | 1.4044078872  |
| C | 1.7714688989  | -0.0628242283 | 0.1938574569  |
| C | 1.4333261868  | 1.2157669016  | -0.5686991107 |
| C | -0.0512758669 | 1.259663547   | -0.9177038351 |
| O | -0.8566613164 | 1.0953076839  | 0.243806843   |
| C | -0.472498603  | 2.5756724202  | -1.5422040298 |
| H | -8.6985007069 | -1.1352455015 | 0.1531701298  |
| H | -5.4267298067 | 0.14391407    | -2.3388503768 |
| H | -6.4822424568 | -1.9366491898 | 2.7627847612  |
| H | -8.874541868  | -0.3011603005 | -1.9723797047 |
| H | -3.0887857638 | -0.4342691963 | -1.5620754514 |
| H | -3.1277438448 | 0.5773882986  | -0.1247855207 |
| H | -2.9143063219 | -2.4615330987 | -0.1734830727 |
| H | -0.7759615339 | -2.2236748203 | 0.8718112088  |
| H | -0.7614836134 | -1.4458146434 | -0.6998706789 |
| H | -1.2200561462 | 0.0615892831  | 1.9121537134  |
| H | 1.0260293404  | -1.1256156179 | 1.9447295071  |
| H | 1.0671976057  | 0.628303041   | 2.1017358529  |
| H | 1.6535299439  | -0.9311492559 | -0.467790274  |
| H | 2.8191737007  | -0.0570472484 | 0.5122633979  |
| H | 2.0268145043  | 1.2975775446  | -1.4863939719 |
| H | 1.6698140321  | 2.0895301652  | 0.0521576325  |
| H | -0.2626535205 | 0.445245908   | -1.63130988   |
| H | 0.0873513804  | 2.7616399668  | -2.4633223685 |

|   |               |              |               |
|---|---------------|--------------|---------------|
| H | -0.2850264254 | 3.3992652902 | -0.8472230931 |
| H | -1.5394465675 | 2.5666325107 | -1.7796335802 |

calc\_1b conf\_5

|   |               |               |               |
|---|---------------|---------------|---------------|
| C | -7.5032824587 | -1.7218929886 | -0.2114660432 |
| C | -7.6332800334 | -0.4115023576 | -0.6545691829 |
| C | -6.6242154968 | 0.5374322855  | -0.4298474466 |
| C | -5.4759030653 | 0.1557692196  | 0.233536374   |
| C | -5.3106733912 | -1.1705086829 | 0.6756977972  |
| C | -6.3484678483 | -2.1111375305 | 0.4687504384  |
| O | -6.2635200411 | -3.3664917525 | 0.9033288807  |
| O | -8.7311638531 | 0.0172329262  | -1.3154287866 |
| C | -4.3673611717 | 1.1204805427  | 0.5460080788  |
| C | -3.0294017432 | 0.4012574315  | 0.5656911701  |
| O | -3.0857632046 | -0.7190272708 | 1.4787209743  |
| C | -4.1074135771 | -1.5825338856 | 1.3880760249  |
| O | -3.9868242099 | -2.6774076215 | 1.9294922835  |
| C | -1.8821217805 | 1.2916390758  | 1.0144046124  |
| C | -0.4828123025 | 0.8096166822  | 0.6381780275  |
| C | -0.0323843148 | -0.4922015845 | 1.2944021212  |
| C | 1.3452815728  | -0.886894359  | 0.7672386291  |
| C | 1.3119705441  | -0.9488524955 | -0.7591968621 |
| C | 0.7708003247  | 0.3473697606  | -1.3672043874 |
| O | -0.4793875664 | 0.700783796   | -0.7787941313 |
| C | 1.7633705352  | 1.5064491404  | -1.3290712342 |
| H | -8.2865203703 | -2.4569255031 | -0.3681234081 |
| H | -6.7680539041 | 1.5523257027  | -0.7820666718 |
| H | -5.4108651252 | -3.430697112  | 1.4066980825  |
| H | -9.350412216  | -0.7181357567 | -1.412612244  |
| H | -4.3367737617 | 1.9270875971  | -0.192128096  |
| H | -4.5431574028 | 1.5849109634  | 1.5261929935  |
| H | -2.8121681232 | 0.0013931198  | -0.4306352156 |
| H | -2.0231024745 | 2.2715417685  | 0.545099837   |
| H | -1.9462590966 | 1.4358277052  | 2.0985236261  |
| H | 0.2175421311  | 1.6041645205  | 0.9450204753  |
| H | -0.7568244298 | -1.2819445912 | 1.0753297724  |
| H | -0.0185571246 | -0.3674705163 | 2.3829097265  |
| H | 1.6496602754  | -1.8554832073 | 1.177113117   |
| H | 2.0953949836  | -0.1590195599 | 1.1033487001  |
| H | 0.6548551603  | -1.7716523287 | -1.0648422885 |
| H | 2.3057547414  | -1.1608909089 | -1.1693688247 |
| H | 0.5159316898  | 0.1631109021  | -2.4161657376 |
| H | 1.2939492964  | 2.4114953373  | -1.7241118466 |
| H | 2.6354842579  | 1.2744011185  | -1.9480880682 |
| H | 2.1246745746  | 1.7233804176  | -0.3200412674 |

calc\_1b conf\_6

|   |               |               |               |
|---|---------------|---------------|---------------|
| C | -7.7837670923 | -1.6172330331 | 0.003169464   |
| C | -7.9071750404 | -0.3050508298 | -0.436195352  |
| C | -6.8293811186 | 0.5914364652  | -0.3665504127 |
| C | -5.6214552088 | 0.1540774911  | 0.136483536   |
| C | -5.4633565537 | -1.1767161885 | 0.5695764659  |
| C | -6.5672317946 | -2.0623232421 | 0.5228657157  |
| O | -6.4881295942 | -3.3172001412 | 0.9591152483  |
| O | -9.0623639094 | 0.1762639573  | -0.9447177244 |
| C | -4.4310408819 | 1.0588510292  | 0.2819101822  |
| C | -3.1486827449 | 0.2646012099  | 0.1053685781  |

|   |               |               |               |
|---|---------------|---------------|---------------|
| O | -3.1196205753 | -0.8492237214 | 1.0230279745  |
| C | -4.1931015003 | -1.6507461331 | 1.1058019363  |
| O | -4.0546110821 | -2.7444879993 | 1.6434921989  |
| C | -1.8972134465 | 1.080313695   | 0.3624934955  |
| C | -0.5850335926 | 0.3146151098  | 0.2310536164  |
| C | -0.327031548  | -0.2468149651 | -1.1645509882 |
| C | 1.0779674519  | -0.842152918  | -1.2466341463 |
| C | 2.1085866106  | 0.1855412266  | -0.7844707724 |
| C | 1.7510168876  | 0.7603776528  | 0.5887428484  |
| O | 0.4159598987  | 1.2581391547  | 0.5873034253  |
| C | 2.0056369276  | -0.20173995   | 1.7459418449  |
| H | -8.6178505529 | -2.3109569266 | -0.0326260589 |
| H | -6.9694318365 | 1.6105974455  | -0.7077801605 |
| H | -5.5789248752 | -3.4245297283 | 1.3409083139  |
| H | -9.7270275842 | -0.5251210372 | -0.9430542937 |
| H | -4.4645953875 | 1.870743239   | -0.4504420439 |
| H | -4.4324875305 | 1.5211634496  | 1.2780576296  |
| H | -3.13121328   | -0.1555531454 | -0.9083670738 |
| H | -1.8820096687 | 1.9230109587  | -0.3387527975 |
| H | -1.9437381809 | 1.5031096418  | 1.3717939433  |
| H | -0.5937494532 | -0.5158256983 | 0.9508892253  |
| H | -0.4278325489 | 0.5667925458  | -1.8955469772 |
| H | -1.0759086121 | -1.0080720904 | -1.409754232  |
| H | 1.2972643007  | -1.1660198145 | -2.2695268356 |
| H | 1.1298325336  | -1.7412727017 | -0.6203560622 |
| H | 2.1349574025  | 1.0121998485  | -1.5045476255 |
| H | 3.1139159495  | -0.2497188867 | -0.756406234  |
| H | 2.3564301333  | 1.6564539945  | 0.7615121046  |
| H | 1.6733311591  | 0.2507574782  | 2.684061376   |
| H | 3.0757966976  | -0.4155499793 | 1.8280418024  |
| H | 1.4862692419  | -1.1567364633 | 1.6286688655  |

calc\_1b conf\_7

|   |               |               |               |
|---|---------------|---------------|---------------|
| C | -7.3937360349 | -0.2741995704 | 0.6991464761  |
| C | -7.0559208475 | 0.3183817752  | -0.5108388602 |
| C | -5.8219193931 | 0.0611354751  | -1.1291729982 |
| C | -4.9257388203 | -0.7885332994 | -0.5139011968 |
| C | -5.233730378  | -1.3835757689 | 0.7245987767  |
| C | -6.4923713321 | -1.1392896149 | 1.3233560848  |
| O | -6.8527521841 | -1.7056919731 | 2.4725810165  |
| O | -7.891373982  | 1.1620138594  | -1.1561120058 |
| C | -3.6101749577 | -1.1708326321 | -1.1271664835 |
| C | -2.5613353761 | -1.391671596  | -0.0478952845 |
| O | -3.0344314008 | -2.3627454639 | 0.9132245231  |
| C | -4.2791117486 | -2.2581237226 | 1.399471573   |
| O | -4.564395526  | -2.9154458768 | 2.396027907   |
| C | -2.1184001209 | -0.1366955316 | 0.6992057087  |
| C | -1.4086407923 | 0.8858116266  | -0.195397917  |
| C | -0.8342417033 | 2.0684453021  | 0.58921169    |
| C | 0.4399948391  | 1.6872814864  | 1.3393935578  |
| C | 1.4248175586  | 1.0297569075  | 0.3758438393  |
| C | 0.7672465759  | -0.1376141186 | -0.3527627388 |
| O | -0.4186479697 | 0.2848269389  | -1.0222111669 |
| C | 1.6573782609  | -0.7509115625 | -1.4155025067 |
| H | -8.3523642707 | -0.0923695758 | 1.1748244154  |
| H | -5.6023094846 | 0.5283989556  | -2.0821940915 |
| H | -6.1117316817 | -2.3151488691 | 2.7270419863  |
| H | -8.7041935185 | 1.258648001   | -0.6426069492 |

|   |               |               |               |
|---|---------------|---------------|---------------|
| H | -3.73287376   | -2.1062379263 | -1.6878669915 |
| H | -3.2621152377 | -0.4213198047 | -1.8420559614 |
| H | -1.6856370257 | -1.8689071797 | -0.4890969269 |
| H | -2.9877452298 | 0.3503225172  | 1.1554558658  |
| H | -1.4734895091 | -0.4581322862 | 1.5232926988  |
| H | -2.1411501593 | 1.2758704226  | -0.9101812028 |
| H | -1.5944697848 | 2.4623867364  | 1.2727626065  |
| H | -0.5994184707 | 2.8651985349  | -0.1261668445 |
| H | 0.2093090092  | 0.9956530379  | 2.1594759178  |
| H | 0.8845864173  | 2.5749651165  | 1.801241354   |
| H | 2.3157451854  | 0.6747145115  | 0.9059018385  |
| H | 1.7586498127  | 1.7615509216  | -0.3711781958 |
| H | 0.5116885126  | -0.9119478089 | 0.3898458775  |
| H | 2.581717888   | -1.1303815061 | -0.9708810301 |
| H | 1.9142853897  | -0.0022227046 | -2.170491544  |
| H | 1.1470012505  | -1.5783637341 | -1.9152228178 |

calc\_lb conf\_8

|   |               |               |               |
|---|---------------|---------------|---------------|
| C | -7.2849970551 | -0.1201415231 | 0.3710432166  |
| C | -6.7125644842 | 0.3182212859  | -0.8161153761 |
| C | -5.4354594878 | -0.1099870577 | -1.2114190385 |
| C | -4.7343358129 | -0.9751615749 | -0.3964289338 |
| C | -5.281858463  | -1.4162362881 | 0.8231568855  |
| C | -6.5817432519 | -0.9999145932 | 1.1968531961  |
| O | -7.164568614  | -1.4165191755 | 2.3184065196  |
| O | -7.3513464363 | 1.1683849596  | -1.6506074601 |
| C | -3.3908472857 | -1.534814745  | -0.7640229323 |
| C | -2.5412040474 | -1.754426208  | 0.4777895261  |
| O | -3.2537481642 | -2.5787595496 | 1.4284013154  |
| C | -4.5364030091 | -2.3097706387 | 1.7056690925  |
| O | -5.0355828802 | -2.8391244943 | 2.6944008746  |
| C | -2.0762064811 | -0.485050262  | 1.1879274501  |
| C | -1.1725344545 | 0.399549007   | 0.3405030703  |
| C | -0.6093872571 | 1.5788535902  | 1.1286649555  |
| C | 0.3869902495  | 2.3594156663  | 0.2744372153  |
| C | 1.4524426886  | 1.4099008503  | -0.270060833  |
| C | 0.8282976689  | 0.21029312    | -0.9875568148 |
| O | -0.1313874249 | -0.4325873425 | -0.1500971647 |
| C | 0.2549403526  | 0.5461505321  | -2.3616209183 |
| H | -8.2784644484 | 0.1947140472  | 0.6748160149  |
| H | -5.0305336187 | 0.2400794962  | -2.1539573549 |
| H | -6.5374059048 | -2.0650299944 | 2.7332230967  |
| H | -8.2159989341 | 1.3871421337  | -1.2789312528 |
| H | -3.5287241588 | -2.501109004  | -1.2658972562 |
| H | -2.8635637381 | -0.8871697041 | -1.4688030627 |
| H | -1.6646781383 | -2.3482039331 | 0.2210252643  |
| H | -2.9420825726 | 0.1036988848  | 1.5104958286  |
| H | -1.5350514575 | -0.7930342954 | 2.0887603466  |
| H | -1.7550290815 | 0.8006014179  | -0.5054319419 |
| H | -0.1062797637 | 1.1917712856  | 2.0237822254  |
| H | -1.4298844821 | 2.222052017   | 1.4660678186  |
| H | 0.8549684601  | 3.1565236349  | 0.8614003077  |
| H | -0.1423565877 | 2.8530549674  | -0.5504433283 |
| H | 2.0531261894  | 1.0332978685  | 0.5661955693  |
| H | 2.1363876127  | 1.9314131613  | -0.9487654353 |
| H | 1.5989096784  | -0.5549774884 | -1.1257683979 |
| H | 1.0552565718  | 0.8710202711  | -3.0334105141 |
| H | -0.4898892997 | 1.3462386792  | -2.3273050711 |

H -0.2152026767 -0.340359004 -2.7963767031

calc\_1b conf\_9

C -7.5543445892 -1.5259585858 0.1698284815  
C -7.7575476651 -0.1942377181 -0.1699603358  
C -6.7045187844 0.7332936403 -0.1454956796  
C -5.4410396619 0.3088478876 0.2116743267  
C -5.2045634339 -1.0390161961 0.5430350222  
C -6.2808899406 -1.95865473 0.542556015  
O -6.1227525604 -3.2340476259 0.8886545293  
O -8.9701013076 0.276875577 -0.5348785022  
C -4.2682115369 1.2453978673 0.2915859801  
C -2.9814722379 0.5053450585 -0.0338272925  
O -2.8489513616 -0.6427803223 0.8298094499  
C -3.8774576801 -1.4943285844 0.9391436878  
O -3.6552667669 -2.613361138 1.3917896534  
C -1.7272783071 1.347150012 0.1524214972  
C -0.5409263733 0.8873969164 -0.7089135752  
C 0.7405237715 1.6821038019 -0.4369471383  
C 1.4250545976 1.2327220359 0.8532098255  
C 1.5993520597 -0.284733749 0.8457464038  
C 0.2597503692 -0.9675317573 0.592793216  
O -0.3080612161 -0.5054933522 -0.632820411  
C 0.3536737183 -2.4741524824 0.4716077563  
H -8.367443123 -2.2450722653 0.167687592  
H -6.9061765015 1.7653715052 -0.4081741438  
H -5.1781264198 -3.3318801985 1.1750572802  
H -9.6100465626 -0.4469628265 -0.5189613907  
H -4.3948658877 2.084000352 -0.3996414698  
H -4.1942683861 1.6683693772 1.3028139348  
H -3.0303752278 0.1267281414 -1.062742621  
H -1.9557182443 2.3824477743 -0.1284196938  
H -1.4823246914 1.3629071192 1.2196317822  
H -0.8316635743 1.0449441912 -1.7550111533  
H 0.5199071927 2.7558343076 -0.4148685576  
H 1.4241209341 1.5128436061 -1.2770763757  
H 0.8246074202 1.5254644137 1.7244857631  
H 2.3911473513 1.7373651462 0.9610191396  
H 2.0165745816 -0.6338148692 1.7971263315  
H 2.3005947344 -0.577819055 0.053666588  
H -0.4235542437 -0.7258973591 1.4188859203  
H 0.7963444838 -2.9042014246 1.3748210108  
H 0.9735652589 -2.7491951669 -0.3871981804  
H -0.643270188 -2.900269324 0.3388853336

calc\_1b conf\_10

C -7.823636073 -1.5479135926 0.0553008187  
C -7.7432769478 -0.4308121699 -0.7666366645  
C -6.5723804295 0.3402380919 -0.8360265882  
C -5.4778723093 -0.0287096411 -0.0814954463  
C -5.5258127262 -1.1681243563 0.7444777395  
C -6.7228950709 -1.9195878641 0.8289475794  
O -6.8399213785 -2.9790527936 1.6255974173  
O -8.7797986512 -0.0264843814 -1.5326213417  
C -4.2015823443 0.7636643637 -0.0680182628  
C -3.0166162517 -0.1585886682 0.1623734431  
O -3.2102809604 -0.9281040478 1.3666275982

|   |               |               |               |
|---|---------------|---------------|---------------|
| C | -4.3777501942 | -1.5652840255 | 1.5508270164  |
| O | -4.4249820239 | -2.4455792525 | 2.4030949394  |
| C | -1.7001206808 | 0.5809034532  | 0.3183167295  |
| C | -0.4852968711 | -0.3242233836 | 0.57344440971 |
| C | -0.0459790067 | -1.1587476022 | -0.6323326836 |
| C | 0.6569099336  | -0.3070800267 | -1.6879482639 |
| C | 1.7825775083  | 0.4927576981  | -1.0374149981 |
| C | 1.2579754689  | 1.2856934365  | 0.156193156   |
| O | 0.6047297014  | 0.4307803024  | 1.0860349142  |
| C | 2.355978383   | 1.9902949045  | 0.9285076158  |
| H | -8.7312256469 | -2.1390879851 | 0.12628453    |
| H | -6.5535086243 | 1.2120306504  | -1.4797360252 |
| H | -5.9891618812 | -3.0457256565 | 2.1311696113  |
| H | -9.5247554802 | -0.6280030581 | -1.4031195358 |
| H | -4.0693030649 | 1.3066144006  | -1.008507335  |
| H | -4.2343198082 | 1.5112153226  | 0.7358116707  |
| H | -2.9599487632 | -0.8737268167 | -0.6688281168 |
| H | -1.558602537  | 1.1920134604  | -0.5800917061 |
| H | -1.7817577611 | 1.2684523006  | 1.1673979714  |
| H | -0.7502619221 | -0.9959289673 | 1.393674316   |
| H | -0.9009192106 | -1.6939698013 | -1.0606356997 |
| H | 0.6512483354  | -1.9232128354 | -0.2706989998 |
| H | -0.0559962172 | 0.3801040068  | -2.1629672115 |
| H | 1.0472056653  | -0.9442652849 | -2.4885895677 |
| H | 2.2485249604  | 1.1746338351  | -1.7580471815 |
| H | 2.5640618205  | -0.191196874  | -0.6820867296 |
| H | 0.5446634046  | 2.0413758419  | -0.2140159261 |
| H | 3.0727838039  | 1.2599464541  | 1.3148601035  |
| H | 1.9355420278  | 2.5367681332  | 1.7764064304  |
| H | 2.888761823   | 2.6969224288  | 0.2854705861  |

calc\_1b conf\_11

|   |               |               |               |
|---|---------------|---------------|---------------|
| C | -7.439084488  | -1.3326947211 | -0.4890109461 |
| C | -6.9152216088 | -0.2846415637 | -1.2360741194 |
| C | -5.6651722192 | 0.2747527047  | -0.931321992  |
| C | -4.9376208202 | -0.2359279199 | 0.1246685752  |
| C | -5.4368096009 | -1.3114592137 | 0.8842956499  |
| C | -6.7129934046 | -1.8466145434 | 0.5864646073  |
| O | -7.2521340528 | -2.8326841199 | 1.3006366417  |
| O | -7.579634367  | 0.250641593   | -2.2846139103 |
| C | -3.6115117339 | 0.3316257862  | 0.5409670703  |
| C | -2.7353665774 | -0.7653575221 | 1.1155009742  |
| O | -3.4216566866 | -1.4344669928 | 2.1997695683  |
| C | -4.6811382194 | -1.8530701537 | 2.0079667799  |
| O | -5.1444344494 | -2.6684032199 | 2.7998485645  |
| C | -1.4173315065 | -0.2965851949 | 1.7158760052  |
| C | -0.307973275  | 0.0745162321  | 0.7362462036  |
| C | 0.1601832947  | -1.0645272427 | -0.1675317325 |
| C | 1.2515948425  | -0.5651656363 | -1.1122037814 |
| C | 0.751885683   | 0.6608347148  | -1.8741801588 |
| C | 0.2139857283  | 1.7356162151  | -0.9254830609 |
| O | -0.7545880053 | 1.181891568   | -0.0342009985 |
| C | 1.3050464616  | 2.4990803452  | -0.1798428013 |
| H | -8.4130397766 | -1.7584301062 | -0.7093157621 |
| H | -5.2961721209 | 1.0998025268  | -1.5294531211 |
| H | -6.6227774129 | -3.012649257  | 2.0463396545  |
| H | -8.4203349277 | -0.2122809517 | -2.396352683  |
| H | -3.0906586327 | 0.8083918955  | -0.2908367453 |

|   |               |               |               |
|---|---------------|---------------|---------------|
| H | -3.7610173677 | 1.103360484   | 1.3081250191  |
| H | -2.5569975316 | -1.5246632955 | 0.3444006838  |
| H | -1.6125641099 | 0.5611576893  | 2.3684682886  |
| H | -1.0442790705 | -1.1042804901 | 2.3547204714  |
| H | 0.5516537652  | 0.3854678427  | 1.3515341188  |
| H | -0.6839484255 | -1.4376650545 | -0.7596525122 |
| H | 0.5217618423  | -1.8972307047 | 0.4462642487  |
| H | 1.5438733522  | -1.3532621027 | -1.8138068084 |
| H | 2.1509602901  | -0.315054608  | -0.5354207362 |
| H | -0.0607480821 | 0.3555281779  | -2.5441929599 |
| H | 1.5435009162  | 1.0850471165  | -2.5017156978 |
| H | -0.3621710733 | 2.4621048598  | -1.5075911984 |
| H | 0.852861801   | 3.1937014585  | 0.5329791156  |
| H | 1.9063383618  | 3.0772903192  | -0.8879417067 |
| H | 1.9857332075  | 1.8423030853  | 0.3686711916  |

calc\_lb conf\_12

|   |               |               |               |
|---|---------------|---------------|---------------|
| C | -7.5310598127 | -0.5351012456 | 0.8408322238  |
| C | -7.5241152324 | -0.2835357338 | -0.5253115062 |
| C | -6.3797551043 | -0.5176091787 | -1.304217973  |
| C | -5.2382006785 | -0.9961668657 | -0.6953445096 |
| C | -5.2119336564 | -1.2395149723 | 0.6912634198  |
| C | -6.3802374198 | -1.0258028545 | 1.4609425566  |
| O | -6.423416867  | -1.2755194586 | 2.7676185585  |
| O | -8.6107129506 | 0.1898184873  | -1.1741568546 |
| C | -3.988688943  | -1.3344265967 | -1.4562494084 |
| C | -2.7533147194 | -1.0725734593 | -0.6061374844 |
| O | -2.8629317133 | -1.7903501504 | 0.6456689698  |
| C | -4.0030809567 | -1.7256519789 | 1.3475045823  |
| O | -3.9784939532 | -2.0915533169 | 2.5193664032  |
| C | -2.4788308144 | 0.4103718491  | -0.3617785653 |
| C | -1.0576375741 | 0.7415473477  | 0.0871511091  |
| C | -0.6530224835 | 0.2038208346  | 1.4573068958  |
| C | 0.8097444241  | 0.5425102613  | 1.7357560782  |
| C | 1.681536143   | 0.0251872422  | 0.5931578527  |
| C | 1.1860801596  | 0.5242200743  | -0.7663040877 |
| O | -0.2025664439 | 0.2439481538  | -0.9342208095 |
| C | 1.5040602975  | 1.9928396756  | -1.034921623  |
| H | -8.4170849375 | -0.3709947736 | 1.4460647857  |
| H | -6.4188305684 | -0.3231610344 | -2.369770679  |
| H | -5.5407764633 | -1.661758305  | 3.006466969   |
| H | -9.3316394951 | 0.3083143534  | -0.5417730774 |
| H | -4.0106084975 | -2.3981134018 | -1.726364413  |
| H | -3.9255923928 | -0.7693149483 | -2.3901844348 |
| H | -1.8747983643 | -1.5122975289 | -1.0796193804 |
| H | -2.6474132056 | 0.9352605401  | -1.308709907  |
| H | -3.1975073893 | 0.8158691444  | 0.3582417612  |
| H | -0.9845741961 | 1.8412643339  | 0.1196410365  |
| H | -0.7955027909 | -0.8807181794 | 1.4814336481  |
| H | -1.3090030477 | 0.628784697   | 2.225607117   |
| H | 1.1308491551  | 0.1008242454  | 2.6847514414  |
| H | 0.9279827485  | 1.6284994906  | 1.8442140958  |
| H | 1.6465841569  | -1.0706052678 | 0.5900819511  |
| H | 2.7295199738  | 0.314115625   | 0.7315572214  |
| H | 1.6629882086  | -0.0689935644 | -1.5536529378 |
| H | 1.1236220535  | 2.6584367346  | -0.2551961248 |
| H | 1.0661652488  | 2.3000859504  | -1.9884985865 |
| H | 2.5871981024  | 2.1380437745  | -1.0922163146 |



calc\_1b conf\_13

|   |               |               |               |
|---|---------------|---------------|---------------|
| C | -7.3433489268 | -0.2017467764 | 0.3802674666  |
| C | -7.2896518442 | -0.6203972949 | -0.9429717088 |
| C | -6.1778181075 | -1.3169538628 | -1.4426000899 |
| C | -5.1159774582 | -1.5798351353 | -0.6024427861 |
| C | -5.1359067019 | -1.1493807273 | 0.7379332253  |
| C | -6.2732455442 | -0.4693162282 | 1.2361824011  |
| O | -6.3624508529 | -0.0695599945 | 2.5023087942  |
| O | -8.2974785028 | -0.3876765802 | -1.8118112246 |
| C | -3.9180478429 | -2.3739300898 | -1.0375353283 |
| C | -2.6640730984 | -1.9143547259 | -0.3058702011 |
| O | -2.8816214556 | -1.9242974335 | 1.1226447181  |
| C | -4.0087681313 | -1.3993258826 | 1.6283455193  |
| O | -4.0392485124 | -1.1636496822 | 2.8323031122  |
| C | -2.1605153179 | -0.5501360516 | -0.7582591677 |
| C | -0.9686192439 | -0.0109154528 | 0.0255456039  |
| C | 0.2613662208  | -0.9138433491 | -0.0028617454 |
| C | 1.4483964338  | -0.2135002279 | 0.657455934   |
| C | 1.6637776503  | 1.16046555    | 0.0266410847  |
| C | 0.3736646465  | 1.9848754732  | 0.0247887742  |
| O | -0.6871532301 | 1.2461214625  | -0.5738449079 |
| C | -0.0078548664 | 2.5343695103  | 1.3968007875  |
| H | -8.2054132854 | 0.3256501821  | 0.7764654398  |
| H | -6.1789536833 | -1.6376909999 | -2.4778610291 |
| H | -5.5383947234 | -0.3873499664 | 2.9544600653  |
| H | -9.0010073321 | 0.0968094897  | -1.3600842422 |
| H | -4.0903836596 | -3.4342358019 | -0.8128109238 |
| H | -3.7642205025 | -2.2968115243 | -2.1177473445 |
| H | -1.8766365974 | -2.6588967701 | -0.4413335054 |
| H | -1.872941459  | -0.6249020734 | -1.8139387582 |
| H | -2.9675008185 | 0.1881960718  | -0.7039532486 |
| H | -1.2712042712 | 0.1328653739  | 1.0728959172  |
| H | 0.5032863798  | -1.1486107126 | -1.0484238519 |
| H | 0.0461882249  | -1.857252521  | 0.5105336405  |
| H | 2.3539669619  | -0.8217277089 | 0.5606942536  |
| H | 1.2578460111  | -0.1129397832 | 1.7332064984  |
| H | 1.9864382126  | 1.0283248907  | -1.0130684133 |
| H | 2.4575127041  | 1.711333846   | 0.5436940586  |
| H | 0.5029571638  | 2.8369097952  | -0.6509498638 |
| H | -0.9686519667 | 3.0523482433  | 1.3352605587  |
| H | 0.7468039127  | 3.250260625   | 1.7369935409  |
| H | -0.0911165859 | 1.7557068431  | 2.1599469467  |

calc\_1b conf\_14

|   |               |               |               |
|---|---------------|---------------|---------------|
| C | -7.206854015  | -0.4289626081 | -0.1455324212 |
| C | -6.4776434722 | -0.2733997271 | -1.3180318836 |
| C | -5.13650262   | -0.6767859473 | -1.401563571  |
| C | -4.5297284834 | -1.2305103049 | -0.2927845122 |
| C | -5.2394954231 | -1.3789960639 | 0.9136255683  |
| C | -6.599356836  | -0.9916608476 | 0.978299206   |
| O | -7.3283528529 | -1.1441592339 | 2.0820895612  |
| O | -7.0197933282 | 0.2650697507  | -2.4334762208 |
| C | -3.121690589  | -1.7490186176 | -0.3183075676 |
| C | -2.4600445416 | -1.5874881011 | 1.041972387   |
| O | -3.2805839723 | -2.1754397967 | 2.0791579088  |
| C | -4.6007787693 | -1.9420173552 | 2.097632444   |

|   |               |               |               |
|---|---------------|---------------|---------------|
| O | -5.2176334786 | -2.2259537167 | 3.1205335422  |
| C | -2.1367955724 | -0.1484438142 | 1.4469519518  |
| C | -0.9554137993 | 0.518804428   | 0.745332747   |
| C | 0.3866945206  | -0.1901897089 | 0.9174618852  |
| C | 1.4750925001  | 0.5678511718  | 0.1584113017  |
| C | 1.0560745281  | 0.7533817193  | -1.2990971051 |
| C | -0.3345059196 | 1.3832064025  | -1.4132658815 |
| O | -1.2810201991 | 0.6552776523  | -0.6308662095 |
| C | -0.3641332243 | 2.8765910426  | -1.100732123  |
| H | -8.2490721639 | -0.1326086029 | -0.0789213182 |
| H | -4.6028346519 | -0.5473004778 | -2.3356808016 |
| H | -6.7420702758 | -1.6006489588 | 2.7400956655  |
| H | -7.9398172938 | 0.5007494727  | -2.2558062502 |
| H | -3.1387803004 | -2.815741068  | -0.5774798086 |
| H | -2.522028376  | -1.2272954354 | -1.0654829304 |
| H | -1.5526776478 | -2.1929482232 | 1.0800564451  |
| H | -3.0226547949 | 0.47811765    | 1.2981724528  |
| H | -1.9242128536 | -0.1559806368 | 2.5214992111  |
| H | -0.8606760214 | 1.5203938157  | 1.1947274476  |
| H | 0.3193656918  | -1.211561077  | 0.5237673901  |
| H | 0.6303702846  | -0.2666166158 | 1.9832361057  |
| H | 2.4274868383  | 0.030310477   | 0.2122496995  |
| H | 1.6430384296  | 1.5423453074  | 0.6343085553  |
| H | 1.0302821624  | -0.2278399118 | -1.7880809711 |
| H | 1.7847052863  | 1.3643729835  | -1.8433156398 |
| H | -0.6971763465 | 1.2513343864  | -2.4378169228 |
| H | -1.3946001427 | 3.2405996125  | -1.1265507561 |
| H | 0.2128569871  | 3.4262398359  | -1.8506054857 |
| H | 0.0579607361  | 3.1169211424  | -0.121183096  |

calc\_1b conf\_15

|   |               |               |               |
|---|---------------|---------------|---------------|
| C | -6.7006951234 | -0.4376701581 | 1.4258431391  |
| C | -7.1225576766 | 0.1686940314  | 0.2496456506  |
| C | -6.3710716772 | 0.0690698247  | -0.9313620346 |
| C | -5.1846154783 | -0.6361536166 | -0.9165830004 |
| C | -4.724585437  | -1.2429765007 | 0.2669794078  |
| C | -5.5050924278 | -1.1587491048 | 1.4437854584  |
| O | -5.1383638696 | -1.747217961  | 2.5800393383  |
| O | -8.2721312077 | 0.876737216   | 0.1782540398  |
| C | -4.3459004429 | -0.8332678756 | -2.1484472931 |
| C | -2.8725989742 | -0.9153578755 | -1.7740526262 |
| O | -2.6689032746 | -1.9385768878 | -0.7800983711 |
| C | -3.4649631764 | -1.9790785337 | 0.2968226865  |
| O | -3.1152908565 | -2.6710987443 | 1.2477454647  |
| C | -2.2935571619 | 0.4316897369  | -1.3352313138 |
| C | -0.9869657746 | 0.3317477179  | -0.5554818813 |
| C | -0.1240214439 | 1.5862970913  | -0.6569652745 |
| C | 1.0904444843  | 1.4605119834  | 0.2622947085  |
| C | 0.6450070844  | 1.1152506892  | 1.6832619072  |
| C | -0.290566731  | -0.0967508599 | 1.7056140835  |
| O | -1.3668772358 | 0.1057355457  | 0.791900097   |
| C | 0.407509686   | -1.4356267878 | 1.4876682657  |
| H | -7.2839780832 | -0.3764763552 | 2.3393264884  |
| H | -6.7399308605 | 0.5458822886  | -1.8321665987 |
| H | -4.3050323892 | -2.2465091994 | 2.3777840772  |
| H | -8.6973894984 | 0.8777201145  | 1.0458417731  |
| H | -4.6429686276 | -1.7650596911 | -2.6462110588 |
| H | -4.5038530583 | -0.0218119695 | -2.8653899814 |

|   |               |               |               |
|---|---------------|---------------|---------------|
| H | -2.2942679558 | -1.2894532348 | -2.6226278901 |
| H | -2.1444076147 | 1.0280232494  | -2.2432555455 |
| H | -3.0079304453 | 0.9735027499  | -0.7066153673 |
| H | -0.4054661249 | -0.5258238215 | -0.9296393176 |
| H | -0.7295645202 | 2.4529945605  | -0.3614449498 |
| H | 0.187849468   | 1.7421719726  | -1.6965432058 |
| H | 1.6704402877  | 2.3895975817  | 0.2630379757  |
| H | 1.7582702953  | 0.6799780227  | -0.1241382591 |
| H | 0.1050402367  | 1.9719786682  | 2.1038494617  |
| H | 1.5103809153  | 0.9303269228  | 2.3296402049  |
| H | -0.7911558825 | -0.138237152  | 2.6780553597  |
| H | -0.3416733077 | -2.2275746326 | 1.4135680165  |
| H | 1.0663342191  | -1.6537842773 | 2.3341262661  |
| H | 1.0210996612  | -1.4546547281 | 0.5821700988  |

calc\_lb conf\_16

|   |               |               |               |
|---|---------------|---------------|---------------|
| C | -7.8382842972 | -1.1701313421 | 0.6091087475  |
| C | -7.7515732828 | -0.2478397339 | -0.4262946672 |
| C | -6.5104688699 | 0.2331645344  | -0.8723027363 |
| C | -5.3559454201 | -0.2326554387 | -0.2785015773 |
| C | -5.4141541361 | -1.1840217567 | 0.7586583554  |
| C | -6.6737814385 | -1.6361008514 | 1.2214178946  |
| O | -6.7908051228 | -2.4986958168 | 2.2278923904  |
| O | -8.8470077968 | 0.2366183357  | -1.0502572843 |
| C | -3.9904359462 | 0.2606024733  | -0.6652225051 |
| C | -2.9805965248 | -0.8619134088 | -0.496240347  |
| O | -3.0126837335 | -1.3589943969 | 0.8599693045  |
| C | -4.2012332839 | -1.6810484316 | 1.3972224028  |
| O | -4.2066416263 | -2.3719574284 | 2.4105383693  |
| C | -1.5359152815 | -0.5251395291 | -0.8372435455 |
| C | -0.9333438832 | 0.7536497654  | -0.2347413419 |
| C | -0.6902013697 | 0.7242653327  | 1.2755421271  |
| C | 0.5020639234  | -0.158330258  | 1.6368568945  |
| C | 1.7209195436  | 0.2632232215  | 0.8199132594  |
| C | 1.392433719   | 0.2837711481  | -0.6696922771 |
| O | 0.2573532477  | 1.1033014696  | -0.9316756244 |
| C | 2.5180465854  | 0.8413139245  | -1.5185248658 |
| H | -8.7954490894 | -1.5331247892 | 0.9701307484  |
| H | -6.4855670597 | 0.9630769756  | -1.6730743193 |
| H | -5.8728720707 | -2.6612007513 | 2.5663540371  |
| H | -9.636977603  | -0.162504388  | -0.6626199078 |
| H | -3.9784077967 | 0.6165420522  | -1.6997609414 |
| H | -3.717729957  | 1.1101628103  | -0.027096243  |
| H | -3.2889577457 | -1.6973788943 | -1.1384678849 |
| H | -0.9339711622 | -1.4019805833 | -0.5801950944 |
| H | -1.476990456  | -0.414886054  | -1.9261956588 |
| H | -1.6086593056 | 1.5846546248  | -0.4645971834 |
| H | -1.5912816455 | 0.3932284692  | 1.7979121869  |
| H | -0.4798809102 | 1.75194989    | 1.595902827   |
| H | 0.2651962187  | -1.2120807661 | 1.4438197879  |
| H | 0.7113587271  | -0.0838036878 | 2.7089620477  |
| H | 2.5682133825  | -0.4087439108 | 0.9987250717  |
| H | 2.0353476062  | 1.2718032826  | 1.1186605075  |
| H | 1.1823218649  | -0.7484443413 | -0.9947209557 |
| H | 2.7402743067  | 1.870504729   | -1.2216356042 |
| H | 2.2359642821  | 0.8438116495  | -2.5745047629 |
| H | 3.4243234078  | 0.2403318702  | -1.4000216322 |

calc\_1b conf\_17

|   |               |               |               |
|---|---------------|---------------|---------------|
| C | -7.8232385658 | -0.8480250894 | 0.4809358693  |
| C | -7.5623525504 | -0.3159439241 | -0.7756952117 |
| C | -6.247765288  | -0.153516783  | -1.2400302105 |
| C | -5.1969995726 | -0.5446231915 | -0.436126826  |
| C | -5.433931573  | -1.1060101763 | 0.8335167533  |
| C | -6.7636579334 | -1.2343311019 | 1.3031985871  |
| O | -7.0445671425 | -1.7150112399 | 2.5119038508  |
| O | -8.5505392629 | 0.0765838852  | -1.6087872162 |
| C | -3.7602337155 | -0.3659964441 | -0.8382648204 |
| C | -2.9205949429 | -1.4834296299 | -0.2417221651 |
| O | -3.0872018561 | -1.5204807491 | 1.192154765   |
| C | -4.3316801255 | -1.5163328606 | 1.6958332962  |
| O | -4.480304547  | -1.84656385   | 2.8677413592  |
| C | -1.4319378369 | -1.4315501089 | -0.5432899126 |
| C | -0.6698365109 | -0.148331791  | -0.2189496504 |
| C | -0.4745476437 | 0.1225544329  | 1.2696470613  |
| C | 0.4446794265  | 1.3250887151  | 1.473124572   |
| C | 1.749678577   | 1.1182434459  | 0.7084091909  |
| C | 1.4901632836  | 0.7747784713  | -0.7604867504 |
| O | 0.5829607263  | -0.3185848342 | -0.8706697694 |
| C | 1.0504747836  | 1.9706103561  | -1.601723563  |
| H | -8.8367427052 | -0.9605656448 | 0.8528895747  |
| H | -6.0854008659 | 0.2780337303  | -2.2209289905 |
| H | -6.173860268  | -1.8712907283 | 2.9607614057  |
| H | -9.4048981551 | -0.0830515733 | -1.1865260877 |
| H | -3.6536776385 | -0.3659046458 | -1.9271081058 |
| H | -3.4001072646 | 0.605611788   | -0.4781837645 |
| H | -3.3034083827 | -2.4389411403 | -0.6236651489 |
| H | -0.946560323  | -2.2686585382 | -0.03046712   |
| H | -1.311275061  | -1.6125051519 | -1.6172803116 |
| H | -1.1951140853 | 0.7105535289  | -0.6683119065 |
| H | -0.0284440689 | -0.769198493  | 1.7271993319  |
| H | -1.441967693  | 0.2767448911  | 1.7546568958  |
| H | 0.6491555437  | 1.4725697076  | 2.5386778911  |
| H | -0.059085875  | 2.2371481156  | 1.1275311587  |
| H | 2.2989814389  | 0.285375671   | 1.163053611   |
| H | 2.3927083135  | 2.0032007731  | 0.7741110264  |
| H | 2.4140649669  | 0.3824658892  | -1.198284147  |
| H | 0.8149519729  | 1.6435534319  | -2.6181400787 |
| H | 1.857161801   | 2.7080421551  | -1.6568635558 |
| H | 0.1709506197  | 2.4766887011  | -1.1938408876 |

calc\_1b conf\_18

|   |               |               |               |
|---|---------------|---------------|---------------|
| C | -7.2759784011 | -0.1403709592 | 0.0837977407  |
| C | -6.9882963882 | -0.5038105385 | -1.2253820592 |
| C | -5.8170393119 | -1.2088484742 | -1.5454700744 |
| C | -4.9328525979 | -1.5352129229 | -0.5384503013 |
| C | -5.1902789319 | -1.1616205549 | 0.7942439239  |
| C | -6.3869061906 | -0.4735457122 | 1.1077675063  |
| O | -6.7008180578 | -0.1263066048 | 2.3532355008  |
| O | -7.8145915599 | -0.2070538598 | -2.2521523075 |
| C | -3.689384964  | -2.3408917111 | -0.781201196  |
| C | -2.5821579092 | -1.933198551  | 0.1819956132  |
| O | -3.0534366452 | -2.0016314381 | 1.545015818   |
| C | -4.2495902015 | -1.4791373164 | 1.8626630838  |
| O | -4.4996891397 | -1.3040462344 | 3.0503446645  |

|   |               |               |               |
|---|---------------|---------------|---------------|
| C | -1.9939871388 | -0.5553864783 | -0.1066561735 |
| C | -0.8663390314 | -0.1435131209 | 0.8516882576  |
| C | 0.4665476167  | -0.8572548862 | 0.6051829651  |
| C | 1.1754822403  | -0.3273646672 | -0.640359336  |
| C | 1.2768296274  | 1.1942656293  | -0.5701435522 |
| C | -0.0969645179 | 1.8097983093  | -0.3235191452 |
| O | -0.688452911  | 1.2664848221  | 0.850017388   |
| C | -0.0477758302 | 3.3109323959  | -0.1191846189 |
| H | -8.1857855046 | 0.3930724056  | 0.3404863832  |
| H | -5.6345838824 | -1.4869761325 | -2.5770058819 |
| H | -5.9817169549 | -0.4847990336 | 2.9348869432  |
| H | -8.5808417444 | 0.2751872955  | -1.9144053746 |
| H | -3.915466665  | -3.4041483591 | -0.6295017839 |
| H | -3.3427246407 | -2.2322527324 | -1.8128647689 |
| H | -1.7904796631 | -2.6861005178 | 0.1553347612  |
| H | -1.6499405384 | -0.5574596293 | -1.1473361974 |
| H | -2.7835523301 | 0.2004733248  | -0.0354539916 |
| H | -1.2046714968 | -0.3648001631 | 1.8675973945  |
| H | 0.3143461428  | -1.9408316361 | 0.5409700727  |
| H | 1.104866556   | -0.6831856678 | 1.4789370186  |
| H | 0.6250476142  | -0.6153773309 | -1.5458435353 |
| H | 2.1691271991  | -0.7791841897 | -0.7294883617 |
| H | 1.7054420354  | 1.6022153999  | -1.4927688969 |
| H | 1.9394583636  | 1.4850229762  | 0.2551554572  |
| H | -0.7383316227 | 1.5911968989  | -1.1940930986 |
| H | -1.0511996573 | 3.7038541837  | 0.0623644253  |
| H | 0.3689613107  | 3.8070974999  | -1.0005976965 |
| H | 0.5757257227  | 3.5537082814  | 0.7461934338  |

calc\_1b conf\_19

|   |               |               |               |
|---|---------------|---------------|---------------|
| C | -7.2482792327 | 0.2393562729  | 0.0104781697  |
| C | -7.1694203342 | -0.276497516  | -1.2768325133 |
| C | -6.0864254508 | -1.075499318  | -1.6773323984 |
| C | -5.0774012695 | -1.3403708548 | -0.7751251797 |
| C | -5.1221815617 | -0.8131381001 | 0.5293689645  |
| C | -6.2325172916 | -0.0317367661 | 0.9295557278  |
| O | -6.3447903347 | 0.4615169536  | 2.160395718   |
| O | -8.1246899935 | -0.0443353064 | -2.2034729158 |
| C | -3.9105630944 | -2.2296756589 | -1.0932706553 |
| C | -2.6632121518 | -1.7552669726 | -0.3608976212 |
| O | -2.9301654102 | -1.677438503  | 1.057191505   |
| C | -4.0447848255 | -1.0654054822 | 1.48020182    |
| O | -4.1090213139 | -0.7437153357 | 2.6640554543  |
| C | -2.1046790053 | -0.4224405636 | -0.8714332602 |
| C | -0.5747107362 | -0.339018804  | -0.7685132473 |
| C | -0.0211865584 | 1.0323705863  | -1.1660832957 |
| C | -0.222737892  | 2.0654103012  | -0.0588457705 |
| C | 0.3188273205  | 1.5190479059  | 1.2596660749  |
| C | -0.3073997816 | 0.1635822468  | 1.5710555066  |
| O | -0.0850979256 | -0.7483154056 | 0.4952656622  |
| C | 0.2651064075  | -0.4982420492 | 2.8069523437  |
| H | -8.0900582949 | 0.8451474302  | 0.331017397   |
| H | -6.068953385  | -1.4719691132 | -2.6859079064 |
| H | -5.5616910888 | 0.1236949039  | 2.6683589784  |
| H | -8.8140142619 | 0.5114684587  | -1.8166421208 |
| H | -4.1410796543 | -3.2541490887 | -0.7734407274 |
| H | -3.719879708  | -2.2665566637 | -2.1695840781 |
| H | -1.8851612588 | -2.5187239544 | -0.4224121892 |

|   |               |               |               |
|---|---------------|---------------|---------------|
| H | -2.3717640174 | -0.2986441633 | -1.9276991478 |
| H | -2.5917310555 | 0.4015673838  | -0.340917426  |
| H | -0.1693523092 | -1.0910176677 | -1.4571738886 |
| H | -0.4798102325 | 1.3630599265  | -2.1051608564 |
| H | 1.0529081582  | 0.9205017113  | -1.3546279356 |
| H | -1.2888754328 | 2.3013767804  | 0.0536711363  |
| H | 0.2739135223  | 3.0043303944  | -0.3256483756 |
| H | 0.1171356199  | 2.2134382917  | 2.0830472348  |
| H | 1.4078717707  | 1.3968480331  | 1.1937327008  |
| H | -1.3890327699 | 0.2967786608  | 1.7164661971  |
| H | 0.1151843148  | 0.1355378331  | 3.6855629954  |
| H | 1.3372902824  | -0.677565527  | 2.6817571813  |
| H | -0.2315697639 | -1.4553112605 | 2.9812207417  |

calc\_1b conf\_20

|   |               |               |               |
|---|---------------|---------------|---------------|
| C | -7.8777869465 | -1.1221354418 | 0.1008990155  |
| C | -7.5311375631 | -0.0284378605 | -0.6826386062 |
| C | -6.2191242213 | 0.4697317504  | -0.6989963658 |
| C | -5.2546146553 | -0.1499094676 | 0.0688892534  |
| C | -5.5745553661 | -1.2721050234 | 0.8558002123  |
| C | -6.908416862  | -1.7455824658 | 0.888299777   |
| O | -7.2764192187 | -2.7741222835 | 1.6482631761  |
| O | -8.4311408297 | 0.6124293482  | -1.459964248  |
| C | -3.8363734219 | 0.3427730277  | 0.1350071313  |
| C | -2.8896474883 | -0.8234490816 | 0.3582744954  |
| O | -3.281263287  | -1.5630793319 | 1.5336891674  |
| C | -4.5639273969 | -1.9306882098 | 1.6750430147  |
| O | -4.8278858511 | -2.798028107  | 2.5009603328  |
| C | -1.4320112666 | -0.4528949342 | 0.5789117662  |
| C | -0.7696867943 | 0.1870903852  | -0.6588547194 |
| C | -0.6602212671 | 1.7144468075  | -0.5923538    |
| C | 0.4319762686  | 2.1579671536  | 0.3795625749  |
| C | 1.7411040584  | 1.443195353   | 0.0536370571  |
| C | 1.5227016728  | -0.0651604912 | -0.000621905  |
| O | 0.4987259299  | -0.3884300481 | -0.9342097234 |
| C | 2.754940662   | -0.8321852583 | -0.4368131121 |
| H | -8.8940281189 | -1.5024642951 | 0.1304110877  |
| H | -5.9914320685 | 1.3322571751  | -1.3146210821 |
| H | -6.4751474086 | -3.0372796759 | 2.1706136262  |
| H | -9.2919222019 | 0.1827115781  | -1.369791384  |
| H | -3.571476567  | 0.8693508016  | -0.7863191462 |
| H | -3.7264671876 | 1.0579723983  | 0.9616482907  |
| H | -2.9643889977 | -1.5111278481 | -0.495199497  |
| H | -1.3646956706 | 0.1886850217  | 1.4644145394  |
| H | -0.8999788814 | -1.3796168136 | 0.8130978829  |
| H | -1.3626908132 | -0.0835977193 | -1.5408615934 |
| H | -1.6257349885 | 2.1535803812  | -0.3177798731 |
| H | -0.4140607311 | 2.0795838082  | -1.596385539  |
| H | 0.1378013345  | 1.9265907233  | 1.411801549   |
| H | 0.5592186784  | 3.2445272198  | 0.3319399325  |
| H | 2.5117442883  | 1.6803666765  | 0.7958150435  |
| H | 2.1141959932  | 1.7750739381  | -0.9237850536 |
| H | 1.2221316479  | -0.4119238218 | 1.0027690946  |
| H | 3.5835082497  | -0.656629463  | 0.2553284336  |
| H | 3.0626695823  | -0.5149754195 | -1.4375266042 |
| H | 2.5465177049  | -1.9045104865 | -0.4673542018 |

calc\_1b conf\_21

|   |               |               |               |
|---|---------------|---------------|---------------|
| C | -7.7176395556 | -1.3738322877 | -0.2508455708 |
| C | -7.92125013   | -0.0692632515 | 0.1813260185  |
| C | -6.8535454606 | 0.7269038351  | 0.6236536274  |
| C | -5.5762961779 | 0.2045737905  | 0.6166209681  |
| C | -5.3395128381 | -1.1082066694 | 0.1659966277  |
| C | -6.4290841544 | -1.9105841541 | -0.2505205671 |
| O | -6.2689574355 | -3.1709331075 | -0.6468915861 |
| O | -9.1479464249 | 0.497061868   | 0.202832899   |
| C | -4.3840769307 | 0.9771454328  | 1.1057272695  |
| C | -3.1415345931 | 0.553704752   | 0.3417590993  |
| O | -2.9580844039 | -0.8705986958 | 0.4373914366  |
| C | -3.9941211498 | -1.6728904631 | 0.1592735597  |
| O | -3.7625312224 | -2.8550953444 | -0.0758057217 |
| C | -1.8676674151 | 1.2207029892  | 0.8313287498  |
| C | -0.5917446352 | 0.715802936   | 0.1577187765  |
| C | 0.4868984445  | 1.788097144   | 0.0251460887  |
| C | 1.7587991191  | 1.177385634   | -0.5613903512 |
| C | 2.1805956042  | -0.0482904463 | 0.2497271184  |
| C | 1.0220050813  | -1.0336921014 | 0.4330374429  |
| O | -0.1191233694 | -0.3573472559 | 0.9510543296  |
| C | 0.6909403857  | -1.8504573963 | -0.8136684339 |
| H | -8.5410338129 | -2.0000635937 | -0.5797369774 |
| H | -7.05479021   | 1.7363105605  | 0.9634116162  |
| H | -5.3074512008 | -3.3829693217 | -0.5212817031 |
| H | -9.7974735209 | -0.1402481654 | -0.1221297455 |
| H | -4.5424386983 | 2.0537370884  | 0.9914649383  |
| H | -4.2267267405 | 0.7843717398  | 2.1753527411  |
| H | -3.282819852  | 0.7834960115  | -0.7238609156 |
| H | -1.9807232903 | 2.2969706959  | 0.6553686697  |
| H | -1.7573113058 | 1.0739704098  | 1.9108849649  |
| H | -0.8439057182 | 0.3524152516  | -0.8519871008 |
| H | 0.6926258558  | 2.2028989118  | 1.0206251742  |
| H | 0.1235879177  | 2.6091837342  | -0.6043720835 |
| H | 2.5682884725  | 1.91488825    | -0.5802010304 |
| H | 1.5750071686  | 0.8943285271  | -1.605816787  |
| H | 2.5093817349  | 0.2801619874  | 1.2429418622  |
| H | 3.0315349526  | -0.5540039208 | -0.2205625754 |
| H | 1.2820361479  | -1.7369817515 | 1.2306392905  |
| H | 0.543624968   | -1.2311142305 | -1.7032812015 |
| H | -0.2236357083 | -2.4242249521 | -0.6429264487 |
| H | 1.5061001016  | -2.5473144405 | -1.0320044689 |

calc\_1b conf\_22

|   |               |               |               |
|---|---------------|---------------|---------------|
| C | -7.2796136087 | -0.1422958164 | 0.0941220131  |
| C | -6.9988772868 | -0.4994604887 | -1.2171398862 |
| C | -5.8261175512 | -1.1998185497 | -1.5465276542 |
| C | -4.9316988255 | -1.5306509837 | -0.5469704221 |
| C | -5.1843915903 | -1.1650554071 | 0.7858796444  |
| C | -6.3838899131 | -0.4791635514 | 1.1080641698  |
| O | -6.6886233119 | -0.1398552921 | 2.3579558784  |
| O | -7.9027588351 | -0.1487895478 | -2.1586770302 |
| C | -3.6871723789 | -2.3302058082 | -0.8051754962 |
| C | -2.5763659103 | -1.9290172181 | 0.1568820637  |
| O | -3.042737709  | -2.0113195051 | 1.5196486677  |
| C | -4.2377620742 | -1.4900318386 | 1.8474848221  |
| O | -4.4803866482 | -1.3242588473 | 3.037228647   |
| C | -1.9916406572 | -0.547894229  | -0.1228704962 |

|   |               |               |               |
|---|---------------|---------------|---------------|
| C | -0.8797470423 | -0.1278804772 | 0.850345774   |
| C | 0.4553777824  | -0.8492468139 | 0.6411846014  |
| C | 1.1917473027  | -0.3400614683 | -0.5971703187 |
| C | 1.296042699   | 1.1822897316  | -0.5476044626 |
| C | -0.0805364941 | 1.8051732363  | -0.3382233924 |
| O | -0.6971640689 | 1.281237073   | 0.8309405469  |
| C | -0.0311499609 | 3.309107217   | -0.1558507074 |
| H | -8.1927961533 | 0.3867904965  | 0.3349497651  |
| H | -5.6280326987 | -1.4830585428 | -2.5772293497 |
| H | -5.9678083659 | -0.5001919879 | 2.9341027191  |
| H | -7.6010066681 | -0.4611964678 | -3.0213614396 |
| H | -3.908543909  | -3.3958996561 | -0.6638096629 |
| H | -3.3447996803 | -2.2093138834 | -1.8372176964 |
| H | -1.7835234417 | -2.6802087929 | 0.1194370359  |
| H | -1.6331369478 | -0.5483556752 | -1.1587638907 |
| H | -2.7857175457 | 0.2041960886  | -0.0622621561 |
| H | -1.2382356068 | -0.3332961892 | 1.8625602731  |
| H | 0.3015309368  | -1.9332763738 | 0.591206633   |
| H | 1.0760466058  | -0.6632038121 | 1.525125946   |
| H | 0.6598326512  | -0.6406368579 | -1.5096976832 |
| H | 2.1857936726  | -0.7956503024 | -0.6583150595 |
| H | 1.7449304626  | 1.575385775   | -1.4670478198 |
| H | 1.9423557065  | 1.4833269605  | 0.2868749664  |
| H | -0.7048049648 | 1.5752270946  | -1.2183534781 |
| H | 0.4045904397  | 3.7906291201  | -1.0362338021 |
| H | 0.5756359493  | 3.5635683922  | 0.717978726   |
| H | -1.0368443601 | 3.7073631987  | -0.0004709885 |

calc\_1b conf\_23

|   |               |               |               |
|---|---------------|---------------|---------------|
| C | -7.7815940579 | -1.0851508318 | -0.202011421  |
| C | -7.4216965693 | 0.1845503679  | -0.6363166121 |
| C | -6.157403109  | 0.7223111848  | -0.348709766  |
| C | -5.2522946878 | -0.033645858  | 0.3675216161  |
| C | -5.5840732026 | -1.3310198453 | 0.8011544004  |
| C | -6.8736135043 | -1.8492858301 | 0.5332071224  |
| O | -7.2563609368 | -3.0506522965 | 0.959246899   |
| O | -8.2634948618 | 0.9659814143  | -1.3478420173 |
| C | -3.8929605704 | 0.4759178506  | 0.7529304141  |
| C | -2.8975545288 | -0.6715568504 | 0.788359419   |
| O | -3.3745719215 | -1.6941177713 | 1.6923233544  |
| C | -4.6358682165 | -2.1340536856 | 1.5650725178  |
| O | -4.9364407695 | -3.1906466733 | 2.1108776134  |
| C | -1.4992114814 | -0.2989193719 | 1.2673494493  |
| C | -0.4913055983 | -0.0299833235 | 0.1541516023  |
| C | -0.8249013264 | 1.1566124036  | -0.7470816004 |
| C | 0.325624976   | 1.4372576463  | -1.713111767  |
| C | 1.632761051   | 1.588931804   | -0.9384605427 |
| C | 1.8726713623  | 0.3971491337  | -0.0084901592 |
| O | 0.7387753317  | 0.1807939821  | 0.8270244262  |
| C | 2.3036382575  | -0.8739529465 | -0.7348472294 |
| H | -8.7636063039 | -1.5001215831 | -0.4062645005 |
| H | -5.9195056264 | 1.7221371555  | -0.693058825  |
| H | -6.509092451  | -3.4039089841 | 1.5079377563  |
| H | -9.0965910491 | 0.4953641649  | -1.4827304465 |
| H | -3.5537011617 | 1.2514482264  | 0.0616872152  |
| H | -3.9344271997 | 0.9320608776  | 1.7512214752  |
| H | -2.8449704006 | -1.1341423277 | -0.2071989361 |
| H | -1.5373629818 | 0.5706236592  | 1.9332232392  |



|   |               |               |               |
|---|---------------|---------------|---------------|
| H | -1.1138016903 | -1.1335039636 | 1.8590879436  |
| H | -0.4237034013 | -0.9350236343 | -0.4732920436 |
| H | -1.0026259109 | 2.0367928987  | -0.1150710911 |
| H | -1.7466810864 | 0.9584579255  | -1.3064872767 |
| H | 0.1225341468  | 2.3411622762  | -2.2968733241 |
| H | 0.4048126261  | 0.6149238467  | -2.4353350547 |
| H | 1.581288648   | 2.4968824318  | -0.32597971   |
| H | 2.4824586919  | 1.7072657683  | -1.6200527538 |
| H | 2.6637854541  | 0.6594963787  | 0.7014108786  |
| H | 1.6039016131  | -1.1741019709 | -1.5197425814 |
| H | 2.3887542876  | -1.6983451991 | -0.0219676942 |
| H | 3.2804081592  | -0.7239884502 | -1.2048619898 |

calc\_1b conf\_24

|   |               |               |               |
|---|---------------|---------------|---------------|
| C | -7.7691823038 | -0.9976330888 | -0.1438127667 |
| C | -7.2934963115 | 0.154991461   | -0.7564894723 |
| C | -5.9731718057 | 0.5903390234  | -0.5645363018 |
| C | -5.1302120918 | -0.1506037579 | 0.2384073613  |
| C | -5.5803738144 | -1.3335164029 | 0.853257422   |
| C | -6.9237945962 | -1.7449702265 | 0.6778350888  |
| O | -7.4156096031 | -2.8291927817 | 1.2722460225  |
| O | -8.0708210311 | 0.9151922218  | -1.5586205153 |
| C | -3.7162798025 | 0.2689456799  | 0.5270306757  |
| C | -2.8392602743 | -0.953069219  | 0.7361035539  |
| O | -3.3985366932 | -1.7991191533 | 1.7626332279  |
| C | -4.6995180276 | -2.1204404661 | 1.70844739    |
| O | -5.0915066872 | -3.0577971185 | 2.395501902   |
| C | -1.4135503586 | -0.6745999937 | 1.1823525505  |
| C | -0.5639142117 | 0.0822916214  | 0.1576393106  |
| C | -0.4575605049 | 1.5823994967  | 0.4268376817  |
| C | 0.5031444511  | 2.2391723685  | -0.5612255457 |
| C | 1.8473513419  | 1.5148149708  | -0.5271682221 |
| C | 1.6778982324  | 0.0055554004  | -0.7178314503 |
| O | 0.7232738546  | -0.5165355006 | 0.203581566   |
| C | 1.3682464133  | -0.4001208211 | -2.1566136222 |
| H | -8.7939488298 | -1.330911931  | -0.2745460183 |
| H | -5.6439208989 | 1.502124612   | -1.0494076625 |
| H | -6.6925507047 | -3.1820985392 | 1.8530042053  |
| H | -8.9502199488 | 0.518964043   | -1.616730104  |
| H | -3.3225546425 | 0.8720439145  | -0.2959916548 |
| H | -3.6877038012 | 0.8927893133  | 1.4307358231  |
| H | -2.8229797137 | -1.5404530575 | -0.1921488392 |
| H | -1.4332847284 | -0.1430382322 | 2.140400741   |
| H | -0.930625886  | -1.6387070068 | 1.3619582805  |
| H | -0.9965574749 | -0.0654704079 | -0.8479536232 |
| H | -0.0833303627 | 1.7164084803  | 1.4498653466  |
| H | -1.4470120614 | 2.0503867641  | 0.3820484795  |
| H | 0.6371627185  | 3.2988878256  | -0.3198845318 |
| H | 0.075163715   | 2.2047319922  | -1.5713696586 |
| H | 2.3175083801  | 1.6870195484  | 0.4481718703  |
| H | 2.528901726   | 1.9111101294  | -1.288087286  |
| H | 2.6085776615  | -0.4913303532 | -0.4253501477 |
| H | 2.2155976563  | -0.1573097629 | -2.8050731265 |
| H | 0.488846104   | 0.1077913284  | -2.5624986079 |
| H | 1.1938049158  | -1.4780423743 | -2.2097193424 |

calc\_1b conf\_25

|   |               |               |               |
|---|---------------|---------------|---------------|
| C | -7.0248812447 | 0.0924539983  | 0.1328744829  |
| C | -6.5544619945 | -0.0420133986 | -1.1670274884 |
| C | -5.4078843811 | -0.8009804393 | -1.4520999699 |
| C | -4.7325113858 | -1.4131050131 | -0.4160460382 |
| C | -5.1755297017 | -1.2748879524 | 0.9126636858  |
| C | -6.3489892974 | -0.5315683305 | 1.183782293   |
| O | -6.8364689153 | -0.4007400921 | 2.4148173589  |
| O | -7.1720068598 | 0.5380407558  | -2.2191841711 |
| C | -3.5358036048 | -2.2929720261 | -0.6308652882 |
| C | -2.5735946269 | -2.18693452   | 0.5439291747  |
| O | -3.2684211105 | -2.4788622007 | 1.7760649798  |
| C | -4.4556126964 | -1.9026335516 | 2.0166350439  |
| O | -4.8910514918 | -1.9393693596 | 3.1629186822  |
| C | -1.8423835598 | -0.8546414944 | 0.694693066   |
| C | -0.8732443996 | -0.5549416118 | -0.4678249559 |
| C | -1.4199066472 | 0.4456620094  | -1.4920117647 |
| C | -1.4035535473 | 1.8720341551  | -0.946748101  |
| C | -0.0141389773 | 2.2105949264  | -0.4139601027 |
| C | 0.439073467   | 1.1549974628  | 0.5885487776  |
| O | 0.4023289174  | -0.1417284793 | 0.0018171888  |
| C | 1.8594561914  | 1.3611123197  | 1.0755872556  |
| H | -7.9193975391 | 0.6644120408  | 0.3586431132  |
| H | -5.0846474053 | -0.8999103878 | -2.4820076091 |
| H | -6.2579583308 | -0.9512626522 | 3.0041725754  |
| H | -7.9448372785 | 1.025851944   | -1.9052454818 |
| H | -3.8668194573 | -3.336070703  | -0.7140944013 |
| H | -3.0233920794 | -2.0507640844 | -1.5658452791 |
| H | -1.831307399  | -2.986606184  | 0.476330852   |
| H | -2.574527399  | -0.0517130623 | 0.8312833791  |
| H | -1.2597415899 | -0.9222121911 | 1.6180935819  |
| H | -0.6544393461 | -1.499131425  | -0.9822703479 |
| H | -2.4344347305 | 0.1647782612  | -1.7951229258 |
| H | -0.7868745329 | 0.3972654057  | -2.3858965102 |
| H | -2.1405206895 | 1.9770908661  | -0.1399505174 |
| H | -1.703210576  | 2.5761996457  | -1.7298814749 |
| H | -0.0055690902 | 3.198606942   | 0.0599708205  |
| H | 0.7072493374  | 2.2371116611  | -1.2408074498 |
| H | -0.2440996766 | 1.1810915235  | 1.4545673898  |
| H | 2.138455939   | 0.5767381943  | 1.7835774155  |
| H | 1.9603393235  | 2.3310562533  | 1.5708519333  |
| H | 2.5563183862  | 1.3249507938  | 0.2330668276  |

calc\_1b conf\_26

|   |               |               |               |
|---|---------------|---------------|---------------|
| C | -7.7937331577 | -1.1192862544 | -0.0813807873 |
| C | -7.3861538447 | -0.0334146311 | -0.8461220124 |
| C | -6.0770237512 | 0.4665937447  | -0.7629221914 |
| C | -5.1772174836 | -0.1436059408 | 0.0862984859  |
| C | -5.5582811947 | -1.2583042553 | 0.8567741973  |
| C | -6.8899445916 | -1.7332096753 | 0.7876140952  |
| O | -7.3171040555 | -2.7538313722 | 1.5270852902  |
| O | -8.2212193992 | 0.5986259247  | -1.6994804903 |
| C | -3.7701588417 | 0.3491155401  | 0.2690660352  |
| C | -2.842538704  | -0.8176474088 | 0.5635649775  |
| O | -3.3257293734 | -1.5337532252 | 1.7225535458  |
| C | -4.6156551375 | -1.9034651549 | 1.7638172955  |
| O | -4.9442017143 | -2.7607048728 | 2.576968169   |
| C | -1.3970401963 | -0.4322308882 | 0.8676822675  |
| C | -0.4318482544 | -0.6400860246 | -0.3093209259 |

|   |               |               |               |
|---|---------------|---------------|---------------|
| C | -0.6697890343 | 0.2540365136  | -1.5282817942 |
| C | -0.2348532351 | 1.6930023003  | -1.2615173486 |
| C | 1.2102831441  | 1.7021976669  | -0.7678027458 |
| C | 1.3783305949  | 0.7690724467  | 0.4282248116  |
| O | 0.9175719688  | -0.5425177377 | 0.1206640474  |
| C | 2.8218777396  | 0.616996313   | 0.8647831547  |
| H | -8.8090435495 | -1.500273051  | -0.1285136967 |
| H | -5.8016341888 | 1.3240378217  | -1.3660004313 |
| H | -6.5608577654 | -3.0090462584 | 2.1161184043  |
| H | -9.087062092  | 0.1703838315  | -1.6731562594 |
| H | -3.4279283448 | 0.8943370523  | -0.6146001615 |
| H | -3.7281813904 | 1.0490421642  | 1.1145548365  |
| H | -2.8760436116 | -1.5250885777 | -0.2770679504 |
| H | -1.3628420734 | 0.5968058493  | 1.2409468337  |
| H | -1.0459757876 | -1.0751909303 | 1.6795064162  |
| H | -0.5317901727 | -1.6864219259 | -0.620968928  |
| H | -1.717095126  | 0.2022198483  | -1.8464372848 |
| H | -0.073628187  | -0.1482453249 | -2.3557482061 |
| H | -0.8842221455 | 2.1556957378  | -0.5064392352 |
| H | -0.337414316  | 2.2960714048  | -2.1697768615 |
| H | 1.5249111066  | 2.7146766157  | -0.4906748533 |
| H | 1.8760435001  | 1.3616292681  | -1.5713145851 |
| H | 0.7951071053  | 1.1741400945  | 1.2715226273  |
| H | 3.2415510487  | 1.5846378472  | 1.1546638277  |
| H | 3.4226026946  | 0.2056578411  | 0.048324642   |
| H | 2.8919318172  | -0.0636523175 | 1.7167927887  |

calc\_1b conf\_27

|   |               |               |               |
|---|---------------|---------------|---------------|
| C | -6.3517370232 | 0.3614967164  | -0.3048366429 |
| C | -5.8927031064 | -0.1337591214 | -1.5207216144 |
| C | -4.8695173497 | -1.0891183834 | -1.5763590809 |
| C | -4.3098361059 | -1.5506576046 | -0.4002419163 |
| C | -4.7528664069 | -1.0657312413 | 0.8415425823  |
| C | -5.792752499  | -0.1024322686 | 0.8862570698  |
| O | -6.2661746774 | 0.3777876885  | 2.033825381   |
| O | -6.4095205177 | 0.2751855971  | -2.7012160124 |
| C | -3.2973767055 | -2.657453191  | -0.4024323518 |
| C | -2.4440343507 | -2.7313700924 | 0.8631324842  |
| O | -3.193488134  | -2.4500970298 | 2.0636427257  |
| C | -4.1976528046 | -1.5667099379 | 2.0918562857  |
| O | -4.6244199334 | -1.2322082266 | 3.1943386102  |
| C | -1.1435781147 | -1.9299526181 | 0.8829260926  |
| C | -1.1898299226 | -0.4207131387 | 0.691208519   |
| C | 0.157236001   | 0.2027464548  | 1.0619861778  |
| C | 0.2095229362  | 1.6801008773  | 0.6829776549  |
| C | -0.1828852166 | 1.8489093062  | -0.7828740755 |
| C | -1.5302388866 | 1.1851324293  | -1.0740624453 |
| O | -1.5040682578 | -0.1859040199 | -0.672485029  |
| C | -2.7159658972 | 1.9463193738  | -0.49035381   |
| H | -7.149450065  | 1.0958617582  | -0.2523258726 |
| H | -4.5406243739 | -1.4546200973 | -2.5421167164 |
| H | -5.7830919854 | -0.1038670094 | 2.7561300813  |
| H | -7.1070113079 | 0.9225132364  | -2.533664111  |
| H | -3.8416043988 | -3.6043748032 | -0.5101313986 |
| H | -2.6384294404 | -2.5653441712 | -1.2687700152 |
| H | -2.1503141906 | -3.775140607  | 1.0032353692  |
| H | -0.6669920192 | -2.1381511717 | 1.8472456971  |
| H | -0.4871779594 | -2.3419918661 | 0.1065454369  |

|   |               |               |               |
|---|---------------|---------------|---------------|
| H | -1.969947378  | 0.0137133259  | 1.3357981119  |
| H | 0.9474476361  | -0.3400960447 | 0.5260700624  |
| H | 0.3386768777  | 0.0665154568  | 2.1340178715  |
| H | 1.2125354684  | 2.0831977722  | 0.8584840847  |
| H | -0.4701668632 | 2.2518440238  | 1.3265417184  |
| H | 0.5797379439  | 1.3782887976  | -1.4149682973 |
| H | -0.2250290606 | 2.9079574768  | -1.0606857387 |
| H | -1.6698643611 | 1.1270032803  | -2.1583564604 |
| H | -2.7770441793 | 2.9395767967  | -0.9464389706 |
| H | -2.6403346088 | 2.0866464266  | 0.5912860394  |
| H | -3.6464287618 | 1.4148958498  | -0.6980074966 |

calc\_1b conf\_28

|   |               |               |               |
|---|---------------|---------------|---------------|
| C | -7.2243521279 | -0.0402002481 | 0.3786108263  |
| C | -6.6803662567 | 0.2492077953  | -0.8660806888 |
| C | -5.4538380881 | -0.3012609133 | -1.2712633655 |
| C | -4.773252356  | -1.1345717703 | -0.407188702  |
| C | -5.2916325941 | -1.4263591773 | 0.8682212826  |
| C | -6.5432915049 | -0.8896986112 | 1.2531833313  |
| O | -7.1006713386 | -1.1643112188 | 2.429642552   |
| O | -7.2994156698 | 1.062778068   | -1.7495917159 |
| C | -3.4870302485 | -1.8156472374 | -0.7753265076 |
| C | -2.5978843323 | -1.9828430057 | 0.448774183   |
| O | -3.3193258031 | -2.6713748539 | 1.4929000269  |
| C | -4.5681971531 | -2.2890437164 | 1.7972883025  |
| O | -5.0539559234 | -2.6951631132 | 2.8480072519  |
| C | -2.0051461492 | -0.6988868003 | 1.0218607573  |
| C | -1.0106672521 | -0.0009169461 | 0.0874986971  |
| C | -1.5756869249 | 1.2419225186  | -0.5966179901 |
| C | -0.4941670305 | 1.9386803415  | -1.4185596295 |
| C | 0.7173426691  | 2.2241462815  | -0.5329505108 |
| C | 1.1906364337  | 0.9655470088  | 0.1996526187  |
| O | 0.1092357339  | 0.3442618738  | 0.8899533037  |
| C | 1.9432195304  | -0.0184593546 | -0.6927913659 |
| H | -8.1798075855 | 0.3688287819  | 0.6918740245  |
| H | -5.0722892011 | -0.0676179118 | -2.2586050791 |
| H | -6.4999968636 | -1.8149002133 | 2.8781187427  |
| H | -8.1277320182 | 1.3779137071  | -1.3644669256 |
| H | -3.7102939823 | -2.8099578058 | -1.1829212029 |
| H | -2.9542384281 | -1.2676126583 | -1.557350048  |
| H | -1.7814199339 | -2.669655211  | 0.2108636174  |
| H | -2.8085328538 | -0.0125032648 | 1.3106787544  |
| H | -1.4659879484 | -0.9678351253 | 1.9339340165  |
| H | -0.6888703559 | -0.7136139698 | -0.6931230204 |
| H | -1.9418744397 | 1.9209522981  | 0.1838453838  |
| H | -2.438371625  | 0.9778553672  | -1.2185512352 |
| H | -0.8774137281 | 2.8702674305  | -1.8479463899 |
| H | -0.2068975098 | 1.3029745596  | -2.2662374744 |
| H | 0.4377193209  | 2.9724413502  | 0.2179615237  |
| H | 1.5430506022  | 2.6460991285  | -1.1166237882 |
| H | 1.8669169238  | 1.2643478542  | 1.0071045904  |
| H | 2.1908399051  | -0.9198640965 | -0.1258344437 |
| H | 2.8762315947  | 0.4326701517  | -1.0442697942 |
| H | 1.371414513   | -0.3175972931 | -1.5756739089 |

calc\_1b conf\_29

|   |               |               |             |
|---|---------------|---------------|-------------|
| C | -7.3973210916 | -0.2033074186 | 0.266852206 |
|---|---------------|---------------|-------------|

|   |               |               |               |
|---|---------------|---------------|---------------|
| C | -6.9081200586 | -0.0110929031 | -1.0188180354 |
| C | -5.653276033  | -0.5096062079 | -1.4033203241 |
| C | -4.8901482549 | -1.1939875624 | -0.4797431283 |
| C | -5.3529246189 | -1.3834877772 | 0.8351675698  |
| C | -6.6311417869 | -0.9005532699 | 1.203138046   |
| O | -7.1354299047 | -1.0865703948 | 2.4204659455  |
| O | -7.6091946583 | 0.6548523747  | -1.9626627812 |
| C | -3.56375861   | -1.8100101601 | -0.8224030649 |
| C | -2.6350050959 | -1.7880041524 | 0.3851095244  |
| O | -3.2836056151 | -2.4237735357 | 1.5102362543  |
| C | -4.545485818  | -2.0924773644 | 1.8211251014  |
| O | -4.9695053154 | -2.4175778067 | 2.9255390274  |
| C | -2.1361900956 | -0.3986859596 | 0.7932410866  |
| C | -0.7673561413 | -0.0227901887 | 0.2310089758  |
| C | -0.698220651  | 0.0954397133  | -1.2896471701 |
| C | 0.6635087198  | 0.6366151109  | -1.7246785541 |
| C | 0.9703514938  | 1.935027049   | -0.9824649629 |
| C | 0.8207238551  | 1.7629196168  | 0.5306354334  |
| O | -0.4568446706 | 1.2164348039  | 0.8464984153  |
| C | 1.9577988139  | 0.9773083871  | 1.178209113   |
| H | -8.3728499869 | 0.166575355   | 0.5665384464  |
| H | -5.3126196325 | -0.3511376841 | -2.4199931595 |
| H | -6.4758462002 | -1.6396285846 | 2.9141428205  |
| H | -8.4479530032 | 0.9509637515  | -1.5851609577 |
| H | -3.7185171899 | -2.8516749896 | -1.1317079177 |
| H | -3.1003050264 | -1.290495922  | -1.6643560926 |
| H | -1.7787861315 | -2.4428750404 | 0.2009482893  |
| H | -2.8606486866 | 0.376075904   | 0.5195703278  |
| H | -2.0435061401 | -0.3783445546 | 1.8827240388  |
| H | -0.042659296  | -0.79070894   | 0.5521850201  |
| H | -1.492740604  | 0.7750958197  | -1.6248944571 |
| H | -0.8804243378 | -0.8814554657 | -1.7528004043 |
| H | 0.6801042142  | 0.8038595638  | -2.8067566165 |
| H | 1.4379639884  | -0.1123823988 | -1.5164004852 |
| H | 0.2657344165  | 2.7081863348  | -1.3107987347 |
| H | 1.9778440445  | 2.2946986858  | -1.2193374355 |
| H | 0.7942133011  | 2.7539075866  | 0.9952288195  |
| H | 1.7537783048  | 0.8393303319  | 2.2432763053  |
| H | 2.8987450951  | 1.526845971   | 1.0771098003  |
| H | 2.1036184076  | -0.0095080782 | 0.7299937146  |

calc\_1b conf\_30

|   |               |               |               |
|---|---------------|---------------|---------------|
| C | -7.0411492462 | -0.1145011113 | -0.1664352005 |
| C | -6.4167610027 | -0.2802402471 | -1.3959659338 |
| C | -5.1895822971 | -0.9539223584 | -1.5052178443 |
| C | -4.5919984091 | -1.4509892044 | -0.3649859361 |
| C | -5.1920931771 | -1.2765484134 | 0.8951427659  |
| C | -6.4423240248 | -0.6203599406 | 0.9893642785  |
| O | -7.0748529421 | -0.4638681565 | 2.1494305812  |
| O | -6.9533335495 | 0.1879603847  | -2.5441263034 |
| C | -3.3116352298 | -2.2352043559 | -0.3978919871 |
| C | -2.5004408019 | -1.9873385512 | 0.8679215674  |
| O | -3.3120900874 | -2.2757950989 | 2.0295226062  |
| C | -4.5570150396 | -1.7834400113 | 2.1064274681  |
| O | -5.1135921483 | -1.7948068347 | 3.1995220576  |
| C | -1.9022115368 | -0.5805017257 | 0.9867793948  |
| C | -0.4278605822 | -0.4888194388 | 0.5606083598  |
| C | -0.1372092649 | -0.7628969115 | -0.916179125  |

|   |               |               |               |
|---|---------------|---------------|---------------|
| C | -0.6075544687 | 0.3881830136  | -1.8014967134 |
| C | 0.0024665243  | 1.6931199771  | -1.2954131241 |
| C | -0.2897473512 | 1.8892729189  | 0.1901691532  |
| O | 0.1294957115  | 0.7583288749  | 0.9483058168  |
| C | 0.4313557048  | 3.0837659382  | 0.782253491   |
| H | -7.9971886036 | 0.3916367315  | -0.0766318694 |
| H | -4.7423490296 | -1.0783133075 | -2.4847425939 |
| H | -6.526429235  | -0.9306599463 | 2.8321143089  |
| H | -7.7917562567 | 0.6263264636  | -2.3475572173 |
| H | -3.5438557613 | -3.305586403  | -0.4670219355 |
| H | -2.7224636107 | -1.977691243  | -1.2813022908 |
| H | -1.7016543055 | -2.7305345497 | 0.9438818698  |
| H | -2.524027849  | 0.1362867984  | 0.4411577466  |
| H | -1.9321705889 | -0.2906844405 | 2.0410457777  |
| H | 0.1233464269  | -1.2200078966 | 1.1639609555  |
| H | -0.5741199143 | -1.7183038161 | -1.2275129316 |
| H | 0.9487468865  | -0.8700575221 | -1.022976869  |
| H | -1.7031465435 | 0.4615909566  | -1.7868315947 |
| H | -0.3225764119 | 0.2077757633  | -2.8434103488 |
| H | -0.37913105   | 2.5510450622  | -1.8603521766 |
| H | 1.0909458868  | 1.667655801   | -1.4354212651 |
| H | -1.3751359022 | 2.0330201536  | 0.3162857024  |
| H | 0.1336970934  | 4.0049832622  | 0.2730576527  |
| H | 1.5134692778  | 2.9610710536  | 0.6791871196  |
| H | 0.1979327092  | 3.181048331   | 1.8453345866  |

calc\_1b conf\_31

|   |               |               |               |
|---|---------------|---------------|---------------|
| C | -6.6856202094 | 0.1594411994  | 0.1400087909  |
| C | -6.1398422171 | 0.1087644402  | -1.1370691676 |
| C | -4.9896785344 | -0.6448504202 | -1.4082455299 |
| C | -4.3801705419 | -1.3388091057 | -0.3833963854 |
| C | -4.9042927702 | -1.2952823229 | 0.9206601832  |
| C | -6.0791160164 | -0.5461148808 | 1.1791514831  |
| O | -6.6323861313 | -0.4884833771 | 2.3891165685  |
| O | -6.6901069062 | 0.7725290537  | -2.1783493352 |
| C | -3.2024662986 | -2.2379932201 | -0.6253253213 |
| C | -2.3162878624 | -2.4294136759 | 0.6040992739  |
| O | -3.0897068544 | -2.6217054399 | 1.8082505861  |
| C | -4.261742429  | -2.0074603293 | 2.0162221223  |
| O | -4.745497339  | -2.0829243507 | 3.1425416016  |
| C | -1.231459612  | -1.3814503562 | 0.8622995195  |
| C | -1.6493494037 | 0.093774038   | 0.8573422172  |
| C | -0.6560655066 | 1.0002335364  | 1.5904264035  |
| C | 0.6188360634  | 1.2136681832  | 0.7794250582  |
| C | 0.2491535748  | 1.7211552424  | -0.6115784192 |
| C | -0.7522346351 | 0.7840019793  | -1.2802968835 |
| O | -1.8968029422 | 0.5739932416  | -0.4615656909 |
| C | -1.2706086967 | 1.3221278922  | -2.6000778803 |
| H | -7.5827369225 | 0.7316055338  | 0.3547064119  |
| H | -4.5974200671 | -0.661724154  | -2.4180094054 |
| H | -6.0873470426 | -1.0782588156 | 2.972473497   |
| H | -7.4688358421 | 1.2541965884  | -1.8700704086 |
| H | -3.5851028378 | -3.2207809265 | -0.9293011408 |
| H | -2.5964327814 | -1.8602432738 | -1.4517606514 |
| H | -1.7983411226 | -3.3865485667 | 0.5000112636  |
| H | -0.7958390629 | -1.6284049286 | 1.8367279165  |
| H | -0.4366345787 | -1.5449344488 | 0.1259965324  |
| H | -2.6192361451 | 0.1844176255  | 1.3545782775  |

|   |               |               |               |
|---|---------------|---------------|---------------|
| H | -0.4377237336 | 0.585720481   | 2.5804320617  |
| H | -1.1407505737 | 1.9708049333  | 1.7486555498  |
| H | 1.180876039   | 0.2740871551  | 0.6958634365  |
| H | 1.2787324387  | 1.9245440566  | 1.287637515   |
| H | 1.136988068   | 1.8176749419  | -1.2468472389 |
| H | -0.204847347  | 2.7174483132  | -0.5317782676 |
| H | -0.2478793363 | -0.1799000642 | -1.466004176  |
| H | -0.4464481588 | 1.4825171132  | -3.3011828781 |
| H | -1.7866170046 | 2.2732497707  | -2.441948184  |
| H | -1.9799587202 | 0.6233273376  | -3.0508193056 |

calc\_1b conf\_32

|   |               |               |               |
|---|---------------|---------------|---------------|
| C | -6.3302112195 | 0.5584526836  | 0.1159147467  |
| C | -6.0924954503 | 0.087783833   | -1.1695262366 |
| C | -5.2183109711 | -0.9852053395 | -1.4022134738 |
| C | -4.5779466756 | -1.575031194  | -0.3306470663 |
| C | -4.7874613407 | -1.1078362848 | 0.9786075738  |
| C | -5.6887254523 | -0.0383334229 | 1.2029782774  |
| O | -5.9452598228 | 0.4292406909  | 2.4216370302  |
| O | -6.688806931  | 0.6285547057  | -2.2542435349 |
| C | -3.6939645866 | -2.7775506222 | -0.4868801618 |
| C | -2.5965122032 | -2.8536347083 | 0.5725499089  |
| O | -3.11155782   | -2.5889373679 | 1.8957694455  |
| C | -4.0800774087 | -1.692300191  | 2.1113036686  |
| O | -4.3248242663 | -1.3889035218 | 3.2763445781  |
| C | -1.3309575638 | -2.0471551988 | 0.2887121701  |
| C | -1.4225108883 | -0.5351464113 | 0.0750172384  |
| C | -1.3784853849 | 0.2831633697  | 1.3632034504  |
| C | -1.3059668472 | 1.7751462769  | 1.0452940268  |
| C | -0.1332027482 | 2.0488821341  | 0.1065564427  |
| C | -0.1759177635 | 1.1407336249  | -1.1249740094 |
| O | -0.2943722328 | -0.2258471823 | -0.7386689623 |
| C | -1.2374825832 | 1.5421594458  | -2.1465764958 |
| H | -7.0140768508 | 1.3800627242  | 0.3045469401  |
| H | -5.0698392474 | -1.3340215135 | -2.4175701668 |
| H | -5.4314656508 | -0.1405149064 | 3.0524007152  |
| H | -7.2686205015 | 1.3484845363  | -1.9726835254 |
| H | -4.3201322076 | -3.6751200599 | -0.4046251646 |
| H | -3.2384919026 | -2.8031846845 | -1.4810583981 |
| H | -2.2758253471 | -3.8958107651 | 0.6472499576  |
| H | -0.6093256839 | -2.255428138  | 1.0863673823  |
| H | -0.9035453815 | -2.4646872348 | -0.6302957192 |
| H | -2.3425380197 | -0.2932391378 | -0.476513592  |
| H | -2.2415968224 | 0.066317514   | 1.9982133786  |
| H | -0.4851194201 | -0.0191265948 | 1.9248843066  |
| H | -1.1969424225 | 2.3563538803  | 1.9668822319  |
| H | -2.2490170565 | 2.098862316   | 0.5868365782  |
| H | 0.8030636865  | 1.8541384373  | 0.6430266614  |
| H | -0.113015445  | 3.0989217294  | -0.2065003872 |
| H | 0.7980208166  | 1.1800237319  | -1.6242642683 |
| H | -1.0054356494 | 2.5281143316  | -2.5610388574 |
| H | -2.2425647376 | 1.592680066   | -1.7186995975 |
| H | -1.2544819965 | 0.8209384482  | -2.9683170923 |

calc\_1b conf\_33

|   |               |              |               |
|---|---------------|--------------|---------------|
| C | -6.7937413613 | 0.3057345874 | 0.4043563784  |
| C | -6.6245548314 | 0.0369544605 | -0.9481632322 |

|   |               |               |               |
|---|---------------|---------------|---------------|
| C | -5.6287255208 | -0.8445633592 | -1.3966242251 |
| C | -4.7975086698 | -1.44581634   | -0.4733774227 |
| C | -4.9351243588 | -1.1778089907 | 0.9002079298  |
| C | -5.9574302978 | -0.302308718  | 1.3420957601  |
| O | -6.1509998354 | -0.0306646564 | 2.6298069861  |
| O | -7.4062249973 | 0.5981302731  | -1.8954933874 |
| C | -3.7673266432 | -2.4631531567 | -0.8677770075 |
| C | -2.5699484084 | -2.5072160625 | 0.0788499925  |
| O | -2.9770118036 | -2.4795474305 | 1.4636689559  |
| C | -4.0339598607 | -1.7708046399 | 1.8791583824  |
| O | -4.1898990697 | -1.6455922431 | 3.0912154598  |
| C | -1.4537160823 | -1.4966012317 | -0.1926806192 |
| C | -1.7907978465 | 0.0055971031  | -0.211847587  |
| C | -1.7245259931 | 0.6922285481  | 1.1566294041  |
| C | -0.2832841767 | 0.8918110827  | 1.6237243266  |
| C | 0.5293426358  | 1.5844128329  | 0.533280729   |
| C | 0.4012553191  | 0.8292984874  | -0.7849992271 |
| O | -0.9657089749 | 0.687035193   | -1.1523306366 |
| C | 1.0790226171  | 1.5342642961  | -1.943430653  |
| H | -7.5684598646 | 0.9779916792  | 0.7594040901  |
| H | -5.5369093182 | -1.0391259098 | -2.4588321058 |
| H | -5.4907541646 | -0.5761063538 | 3.1319890619  |
| H | -8.0484564943 | 1.1834075406  | -1.4727092282 |
| H | -4.2463263576 | -3.4505333659 | -0.8669262313 |
| H | -3.4140371372 | -2.2876130497 | -1.8881208122 |
| H | -2.108590814  | -3.4939188227 | -0.0131517363 |
| H | -0.6508383715 | -1.7098629933 | 0.5208270945  |
| H | -1.061802462  | -1.7438839726 | -1.1868359799 |
| H | -2.7949949601 | 0.1342637308  | -0.6241965078 |
| H | -2.2910380452 | 0.1280210232  | 1.9025483618  |
| H | -2.2056392382 | 1.672596383   | 1.0610239926  |
| H | 0.17611461    | -0.0750405898 | 1.8669766663  |
| H | -0.2697230563 | 1.476808101   | 2.5491581289  |
| H | 1.5856791388  | 1.6585939928  | 0.8164756459  |
| H | 0.157450192   | 2.6064085537  | 0.3842242401  |
| H | 0.8538517287  | -0.1693256518 | -0.6612231969 |
| H | 2.1487067098  | 1.6557301426  | -1.7496018636 |
| H | 0.6362427583  | 2.5233906913  | -2.0922718896 |
| H | 0.953393306   | 0.9618088357  | -2.8660280374 |



**Table S30.** Sampled and DFT geometry optimized conformers related to calc\_1c, with energy values (Hartree) and related % contribution on the final Boltzmann distribution for the three employed functional/basis set combinations.

| Conformer       | MPW1PW91/6-31g(d,p) |                                              | MPW1PW91/6-311+g(d,p) |                                              | B97-2/cc-pVTZ    |                                              |
|-----------------|---------------------|----------------------------------------------|-----------------------|----------------------------------------------|------------------|----------------------------------------------|
|                 | Energy (Hartree)    | % contribution on the Boltzmann distribution | Energy (Hartree)      | % contribution on the Boltzmann distribution | Energy (Hartree) | % contribution on the Boltzmann distribution |
| calc_1c conf_1  | -997.7128633        | 30.73%                                       | -997.9473639          | 23.32%                                       | -997.906243      | 18.46%                                       |
| calc_1c conf_2  | -997.7127837        | 28.25%                                       | -997.9476911          | 32.98%                                       | -997.906957      | 39.32%                                       |
| calc_1c conf_3  | -997.7119331        | 11.47%                                       | -997.9466498          | 10.95%                                       | -997.905516      | 8.54%                                        |
| calc_1c conf_4  | -997.7118445        | 10.45%                                       | -997.9469827          | 15.57%                                       | -997.906352      | 20.72%                                       |
| calc_1c conf_5  | -997.7115434        | 7.59%                                        | -997.9463331          | 7.83%                                        | -997.905056      | 5.25%                                        |
| calc_1c conf_6  | -997.7112678        | 5.67%                                        | -997.9456922          | 3.97%                                        | -997.904662      | 3.46%                                        |
| calc_1c conf_7  | -997.7103432        | 2.13%                                        | -997.9447668          | 1.49%                                        | -997.903149      | 0.70%                                        |
| calc_1c conf_8  | -997.7098307        | 1.24%                                        | -997.9449555          | 1.82%                                        | -997.903769      | 1.34%                                        |
| calc_1c conf_9  | -997.7093698        | 0.76%                                        | -997.9438321          | 0.55%                                        | -997.902300      | 0.28%                                        |
| calc_1c conf_10 | -997.7091792        | 0.62%                                        | -997.9438379          | 0.56%                                        | -997.903029      | 0.61%                                        |
| calc_1c conf_11 | -997.7090163        | 0.52%                                        | -997.9432388          | 0.30%                                        | -997.901909      | 0.19%                                        |
| calc_1c conf_12 | -997.7079788        | 0.17%                                        | -997.9427438          | 0.17%                                        | -997.902746      | 0.45%                                        |
| calc_1c conf_13 | -997.7075991        | 0.12%                                        | -997.9426792          | 0.16%                                        | -997.902091      | 0.23%                                        |
| calc_1c conf_14 | -997.7074178        | 0.10%                                        | -997.9424855          | 0.13%                                        | -997.902011      | 0.21%                                        |
| calc_1c conf_15 | -997.7073956        | 0.09%                                        | -997.9422959          | 0.11%                                        | -997.900200      | 0.03%                                        |
| calc_1c conf_16 | -997.7066684        | 0.04%                                        | -997.9413475          | 0.04%                                        | -997.901716      | 0.15%                                        |
| calc_1c conf_17 | -997.7059392        | 0.02%                                        | -997.9409557          | 0.03%                                        | -997.899743      | 0.02%                                        |
| calc_1c conf_18 | -997.7057660        | 0.02%                                        | -997.9408909          | 0.02%                                        | -997.899825      | 0.02%                                        |
| calc_1c conf_19 | -997.7038946        | 0.00%                                        | -997.9392581          | 0.00%                                        | -997.897492      | 0.00%                                        |
| calc_1c conf_20 | -997.7015944        | 0.00%                                        | -997.9351053          | 0.00%                                        | -997.892976      | 0.00%                                        |

**Table S31.** Cartesian coordinates of the optimized geometries for the conformers related to calc\_1c. The related energies and % contribution on the final Boltzmann distribution for the three employed functional/basis set combinations are reported in Table S30.

calc\_1c conf\_1

|   |               |               |               |
|---|---------------|---------------|---------------|
| C | -7.4302241253 | -0.514733415  | 3.4644105364  |
| C | -6.4045823942 | -1.4037444659 | 3.7621244368  |
| C | -5.344891342  | -1.6203565001 | 2.8684921032  |
| C | -5.3292943839 | -0.9464897701 | 1.6639444379  |
| C | -6.3679069808 | -0.0557975357 | 1.3292320308  |
| C | -7.4149551492 | 0.178310847   | 2.2533308167  |
| O | -8.3968287604 | 1.0433702131  | 2.0074970962  |
| O | -6.3704707534 | -2.0967609776 | 4.921888837   |
| C | -4.208091769  | -1.0862066147 | 0.6748972863  |
| C | -4.7440454681 | -0.9158728226 | -0.7352159142 |
| O | -5.4467054963 | 0.340429772   | -0.8612498573 |
| C | -6.3613478112 | 0.6684084897  | 0.0639459614  |
| O | -7.1455333817 | 1.574978675   | -0.198808145  |
| C | -3.7157810299 | -0.9358480939 | -1.8565630326 |
| C | -2.6524992941 | 0.1539341574  | -1.814197291  |
| C | -1.9513557805 | 0.3217114276  | -3.1604536542 |
| C | -0.815460357  | 1.3363096926  | -3.0501029768 |
| C | 0.1059557734  | 0.9757232826  | -1.8870017594 |
| C | -0.6996073842 | 0.7774445875  | -0.6065355059 |
| O | -1.7135103878 | -0.2007490641 | -0.8068610749 |
| C | 0.1434413278  | 0.3054895188  | 0.5610654268  |
| H | -8.2440279357 | -0.3300131561 | 4.1585979961  |
| H | -4.5568253474 | -2.3117403017 | 3.1436990574  |
| H | -8.17936714   | 1.4735583236  | 1.1404721981  |
| H | -7.1453758686 | -1.8668628322 | 5.4513072441  |
| H | -3.7223837507 | -2.06210376   | 0.763965652   |
| H | -3.4332690152 | -0.3361397031 | 0.8634645624  |
| H | -5.4802676883 | -1.7079032765 | -0.9271346627 |
| H | -3.2156996052 | -1.9108024963 | -1.8598739206 |
| H | -4.2642090351 | -0.8494379674 | -2.8005969296 |
| H | -3.1265630107 | 1.1112464286  | -1.5416800202 |
| H | -1.5536564703 | -0.6532157568 | -3.4715349694 |
| H | -2.6792788636 | 0.6351380168  | -3.9170198118 |
| H | -0.2531521676 | 1.3896168807  | -3.9882161909 |
| H | -1.2393867387 | 2.3351899013  | -2.8805077448 |
| H | 0.6399166153  | 0.0423581671  | -2.1067353012 |
| H | 0.8609567822  | 1.7547761581  | -1.7316709274 |
| H | -1.1845408026 | 1.7345593983  | -0.3458179261 |
| H | 0.9309832167  | 1.0306784773  | 0.7846619531  |
| H | 0.6121291221  | -0.6546212562 | 0.3258550204  |
| H | -0.4722873486 | 0.1761673511  | 1.454924963   |

calc\_1c conf\_2

|   |               |               |              |
|---|---------------|---------------|--------------|
| C | -7.3076771057 | -1.1505263238 | 3.4048008439 |
| C | -6.0496592961 | -0.8786267753 | 3.9278987954 |
| C | -5.0581247974 | -0.2568543248 | 3.1540816957 |
| C | -5.3362592072 | 0.0780493656  | 1.8443034401 |
| C | -6.5958966076 | -0.2046523021 | 1.2838783914 |
| C | -7.5982292008 | -0.803848414  | 2.0842841738 |
| O | -8.8206065909 | -1.0524837733 | 1.6198590911 |

|   |               |               |               |
|---|---------------|---------------|---------------|
| O | -5.718006277  | -1.1903120599 | 5.2005803353  |
| C | -4.3413064866 | 0.7806443972  | 0.9640186634  |
| C | -4.5458642125 | 0.3736724463  | -0.4836671022 |
| O | -5.9162363794 | 0.5985584128  | -0.8829317759 |
| C | -6.904753458  | 0.1524337127  | -0.0965271871 |
| O | -8.0337560377 | 0.079724985   | -0.5720607751 |
| C | -3.707991812  | 1.1423323941  | -1.4920799762 |
| C | -2.2076552486 | 0.9695144479  | -1.3089287802 |
| C | -1.4040978022 | 1.6445488398  | -2.4174734509 |
| C | 0.0840510004  | 1.340512249   | -2.2580269805 |
| C | 0.3028701574  | -0.1654842436 | -2.1274703302 |
| C | -0.5842828943 | -0.7441364999 | -1.0291725496 |
| O | -1.9485921583 | -0.4239995879 | -1.272999068  |
| C | -0.5004844331 | -2.2531795392 | -0.9222426073 |
| H | -8.0849754249 | -1.6166325776 | 4.0021351429  |
| H | -4.092839238  | -0.0507070402 | 3.6019139443  |
| H | -8.8489762356 | -0.6840522207 | 0.6986628071  |
| H | -6.4733932526 | -1.6119427705 | 5.6309427108  |
| H | -3.3208025301 | 0.5365972435  | 1.2709908138  |
| H | -4.4621186328 | 1.8686573229  | 1.059416014   |
| H | -4.344930061  | -0.697202778  | -0.587456399  |
| H | -3.9903871531 | 0.7999611569  | -2.4930881618 |
| H | -3.9589587753 | 2.207428779   | -1.4317236608 |
| H | -1.8984881648 | 1.4101877232  | -0.3434539922 |
| H | -1.7607062901 | 1.2648667076  | -3.3830699071 |
| H | -1.5876963266 | 2.7248544091  | -2.403151198  |
| H | 0.6513551406  | 1.7425784619  | -3.1038353289 |
| H | 0.4648060527  | 1.8426809547  | -1.3582372503 |
| H | 0.0510627212  | -0.6632534342 | -3.0724746244 |
| H | 1.3532702927  | -0.3898529699 | -1.9101535927 |
| H | -0.287724436  | -0.2914046167 | -0.0658657785 |
| H | -0.8041956989 | -2.7168436024 | -1.8652344217 |
| H | -1.1617323202 | -2.6188063541 | -0.1325469754 |
| H | 0.5219891801  | -2.5670018011 | -0.693894989  |

calc\_1c conf\_3

|   |               |               |               |
|---|---------------|---------------|---------------|
| C | -7.5538907057 | -1.3447939653 | 3.0346003195  |
| C | -6.6838997021 | -0.8246443147 | 3.9848858879  |
| C | -5.6177136657 | 0.0104724633  | 3.6173917067  |
| C | -5.4236663114 | 0.3078310232  | 2.2839213619  |
| C | -6.2784649592 | -0.2224788186 | 1.2990730035  |
| C | -7.369018542  | -1.0384768598 | 1.6855623168  |
| O | -8.2336556537 | -1.5305253666 | 0.8010667442  |
| O | -6.8196882025 | -1.0885992785 | 5.3030903574  |
| C | -4.3261512237 | 1.2187726979  | 1.8122581204  |
| C | -3.8576469848 | 0.803220257   | 0.428347968   |
| O | -4.9825864741 | 0.7569092596  | -0.4789262043 |
| C | -6.0862905324 | 0.0890431062  | -0.1122105726 |
| O | -6.8940854011 | -0.2136271855 | -0.9850645739 |
| C | -2.8345698327 | 1.7567561119  | -0.1678536396 |
| C | -1.9925900915 | 1.1872670368  | -1.3071864521 |
| C | -2.7460983417 | 0.8629497289  | -2.5944446142 |
| C | -1.7906421164 | 0.2386946857  | -3.6100027165 |
| C | -1.0638722421 | -0.9497186787 | -2.9840322715 |
| C | -0.4004205504 | -0.5433136446 | -1.6717121664 |
| O | -1.351674101  | 0.0330832117  | -0.7859559268 |
| C | 0.2346303459  | -1.7056872056 | -0.9354742082 |
| H | -8.3900733957 | -1.97824557   | 3.3136898803  |

|   |               |               |               |
|---|---------------|---------------|---------------|
| H | -4.9672204649 | 0.4044855297  | 4.3896395756  |
| H | -7.9736061243 | -1.1580776907 | -0.0809409649 |
| H | -7.5788678633 | -1.6720370015 | 5.4332457373  |
| H | -3.4805250119 | 1.1971248046  | 2.5056428482  |
| H | -4.6899496206 | 2.2548841597  | 1.7761050305  |
| H | -3.4318562344 | -0.204924604  | 0.4735294366  |
| H | -3.3448991549 | 2.6675163609  | -0.4993166318 |
| H | -2.1445374695 | 2.0415482124  | 0.6340661049  |
| H | -1.2177408531 | 1.9376901668  | -1.5479505596 |
| H | -3.5646557174 | 0.1722240392  | -2.3729166894 |
| H | -3.2007855783 | 1.7768404803  | -2.9927984186 |
| H | -2.3337447082 | -0.0700719288 | -4.5091295245 |
| H | -1.052703099  | 0.9876637657  | -3.9295347718 |
| H | -1.7785196191 | -1.7562799249 | -2.7763155094 |
| H | -0.307991323  | -1.3517128137 | -3.6684222447 |
| H | 0.3708833202  | 0.216437064   | -1.8915553746 |
| H | 1.0126806516  | -2.1706882347 | -1.5475459041 |
| H | -0.5199249809 | -2.4620572866 | -0.7001470984 |
| H | 0.6840325348  | -1.3664537929 | 0.0013206384  |

calc\_lc conf\_4

|   |               |               |               |
|---|---------------|---------------|---------------|
| C | -7.9641493562 | -0.9651084611 | 3.2559244832  |
| C | -7.0736344323 | -0.4394728669 | 4.18373287    |
| C | -5.874416458  | 0.1678892698  | 3.7799100992  |
| C | -5.5710228921 | 0.2306920565  | 2.4355637001  |
| C | -6.4462816001 | -0.3128007607 | 1.475379385   |
| C | -7.6671063788 | -0.8954173541 | 1.8939053868  |
| O | -8.5515212589 | -1.385872648  | 1.0286797363  |
| O | -7.3137330936 | -0.479338293  | 5.512405506   |
| C | -4.3282969022 | 0.8974092314  | 1.9179418455  |
| C | -3.8608269006 | 0.2107163124  | 0.6466548493  |
| O | -4.9259147637 | 0.1838488562  | -0.3267287227 |
| C | -6.1391847488 | -0.249043834  | 0.0514202856  |
| O | -6.938906774  | -0.5587123306 | -0.8253819916 |
| C | -2.6806887604 | 0.8993418456  | -0.0096465872 |
| C | -2.2137522154 | 0.2786035199  | -1.321506283  |
| C | -1.7543516454 | -1.1724470206 | -1.203785843  |
| C | -1.1630140645 | -1.6497129933 | -2.5299898635 |
| C | -0.0983819301 | -0.6725083117 | -3.0232576722 |
| C | -0.649483738  | 0.7504943804  | -3.0436549978 |
| O | -1.1473186107 | 1.1049937585  | -1.7613270575 |
| C | 0.3886158137  | 1.7903295502  | -3.4146657526 |
| H | -8.9007476995 | -1.4215895258 | 3.5602768925  |
| H | -5.2117249847 | 0.5773198358  | 4.5335336234  |
| H | -8.1953862874 | -1.1922432946 | 0.1234336935  |
| H | -8.160628067  | -0.9172368672 | 5.6695769256  |
| H | -3.5300656876 | 0.87230259    | 2.6655176767  |
| H | -4.5341956163 | 1.9537157265  | 1.6992930913  |
| H | -3.6141105862 | -0.8329651845 | 0.8796529891  |
| H | -2.9338995613 | 1.9477730589  | -0.2002936083 |
| H | -1.8415460872 | 0.8943321989  | 0.6959361218  |
| H | -3.0349097602 | 0.3295982731  | -2.0538946501 |
| H | -0.9981114511 | -1.2391171484 | -0.4102977562 |
| H | -2.5951972362 | -1.812857986  | -0.9156161531 |
| H | -0.7469558551 | -2.6571879417 | -2.4245281009 |
| H | -1.965686263  | -1.7182082009 | -3.2762462122 |
| H | 0.7719779784  | -0.696394303  | -2.3549835891 |
| H | 0.2510024825  | -0.9499834339 | -4.0243629688 |

|   |               |              |               |
|---|---------------|--------------|---------------|
| H | -1.4835313189 | 0.7919662976 | -3.7665024124 |
| H | 0.785795247   | 1.5989746326 | -4.4156435826 |
| H | 1.218137414   | 1.7691007337 | -2.7016616682 |
| H | -0.0508459499 | 2.790816632  | -3.3987636879 |

calc\_1c conf\_5

|   |               |               |               |
|---|---------------|---------------|---------------|
| C | -7.0696408206 | 0.2747556966  | 3.4375822878  |
| C | -5.875547279  | -0.3085734157 | 3.8414532968  |
| C | -5.0075061315 | -0.9084414127 | 2.9155945132  |
| C | -5.3462082242 | -0.9074966502 | 1.5778530777  |
| C | -6.539774651  | -0.3034984702 | 1.1393611496  |
| C | -7.4197633049 | 0.2734338705  | 2.0855983637  |
| O | -8.5792784229 | 0.8229310669  | 1.7324116569  |
| O | -5.4908076868 | -0.335402475  | 5.1369112358  |
| C | -4.5114189802 | -1.5769249601 | 0.5248218945  |
| C | -4.6106038236 | -0.8304986136 | -0.7967566944 |
| O | -5.9966289645 | -0.6846631084 | -1.1821068705 |
| C | -6.8951065613 | -0.2753497644 | -0.2768382938 |
| O | -7.991747915  | 0.0991227899  | -0.6818047707 |
| C | -3.9521510721 | 0.5466263345  | -0.8229980464 |
| C | -2.4386957597 | 0.5123487452  | -0.6690345765 |
| C | -1.8072300742 | 1.8923980041  | -0.8317981166 |
| C | -0.2839086201 | 1.7890729623  | -0.7907861509 |
| C | 0.1999155757  | 0.7368120228  | -1.7865287194 |
| C | -0.5323637494 | -0.5846581446 | -1.5712721631 |
| O | -1.939457523  | -0.3905787146 | -1.6420209128 |
| C | -0.182359549  | -1.6387541559 | -2.6019432731 |
| H | -7.7527378307 | 0.72649847    | 4.1500611918  |
| H | -4.0929242249 | -1.3681863603 | 3.2720122808  |
| H | -8.6693433911 | 0.6774221073  | 0.7543458035  |
| H | -6.163713228  | 0.0999785496  | 5.676642855   |
| H | -4.8760199428 | -2.6010066845 | 0.3736697758  |
| H | -3.4659584102 | -1.6584876384 | 0.8333820643  |
| H | -4.1793412641 | -1.4349438203 | -1.5941068829 |
| H | -4.1999979704 | 1.0083848655  | -1.7846317069 |
| H | -4.3741534759 | 1.1819390362  | -0.0365732502 |
| H | -2.1743539369 | 0.1316472037  | 0.334304015   |
| H | -2.1273663656 | 2.3082132626  | -1.7953015736 |
| H | -2.1761128247 | 2.5627502486  | -0.0473775374 |
| H | 0.1736848315  | 2.7612042558  | -1.0016851207 |
| H | 0.0347956028  | 1.5056983733  | 0.2215152245  |
| H | 0.006614115   | 1.0753421772  | -2.8123137047 |
| H | 1.2804375799  | 0.5790993328  | -1.693476788  |
| H | -0.2835337874 | -0.9612504501 | -0.5627416033 |
| H | -0.4330833727 | -1.2847502428 | -3.6061140913 |
| H | -0.741161144  | -2.5591867329 | -2.4143021049 |
| H | 0.8865525775  | -1.8680275606 | -2.5710077347 |

calc\_1c conf\_6

|   |               |               |              |
|---|---------------|---------------|--------------|
| C | -7.2329173675 | -1.3152185264 | 3.2402709552 |
| C | -5.9002747923 | -1.3486937135 | 3.6324195284 |
| C | -4.8951857156 | -0.7582878565 | 2.8514783919 |
| C | -5.2376824998 | -0.1431411063 | 1.6642766885 |
| C | -6.578366568  | -0.1135421971 | 1.2343825734 |
| C | -7.5872422613 | -0.685235689  | 2.0463391364 |
| O | -8.8749120625 | -0.6452494772 | 1.7098909812 |
| O | -5.5054156137 | -1.9425454874 | 4.7807168603 |

|   |               |               |               |
|---|---------------|---------------|---------------|
| C | -4.2285938598 | 0.5452276391  | 0.7913226498  |
| C | -4.6455542062 | 0.4363285269  | -0.6631675422 |
| O | -5.9834081019 | 0.957774813   | -0.8398188993 |
| C | -6.9539800861 | 0.5409468086  | -0.0133983654 |
| O | -8.1185201527 | 0.7422433311  | -0.344260144  |
| C | -3.7910972141 | 1.2186170662  | -1.6495638894 |
| C | -2.3852981085 | 0.6911459389  | -1.9158330791 |
| C | -2.3138463702 | -0.7512686318 | -2.4148210564 |
| C | -0.8574581736 | -1.150812013  | -2.6457730938 |
| C | -0.0280791585 | -0.8639206549 | -1.395100703  |
| C | -0.2295575033 | 0.5761586892  | -0.932247871  |
| O | -1.6120026908 | 0.849181475   | -0.7356066975 |
| C | 0.4745220145  | 0.892286513   | 0.3717438242  |
| H | -8.0172251113 | -1.7554867556 | 3.8480563898  |
| H | -3.868859365  | -0.7935276286 | 3.1979925184  |
| H | -8.9287424293 | -0.1088617254 | 0.8769075785  |
| H | -6.2785984739 | -2.3083569952 | 5.2301479914  |
| H | -3.2282482629 | 0.1266925027  | 0.9146759756  |
| H | -4.1613893399 | 1.6072341243  | 1.0626213804  |
| H | -4.6846280214 | -0.6222646674 | -0.9481061657 |
| H | -4.3311102862 | 1.2385395579  | -2.6022685365 |
| H | -3.7147735228 | 2.255455047   | -1.3050878221 |
| H | -1.9502852305 | 1.3367801558  | -2.6994296313 |
| H | -2.7578980055 | -1.4196124924 | -1.6676643748 |
| H | -2.8992678108 | -0.8559845277 | -3.3353991038 |
| H | -0.7863407758 | -2.2075058262 | -2.9233548809 |
| H | -0.4533538136 | -0.5761025659 | -3.4900806703 |
| H | -0.3332681201 | -1.5350147039 | -0.5818851337 |
| H | 1.0362236261  | -1.0449186381 | -1.5829530908 |
| H | 0.1440947358  | 1.252413294   | -1.7215414719 |
| H | 1.5546393215  | 0.7562977116  | 0.2677789022  |
| H | 0.1187340698  | 0.2317969783  | 1.1682387164  |
| H | 0.2801673077  | 1.925431707   | 0.6701011812  |

calc\_lc conf\_7

|   |               |               |               |
|---|---------------|---------------|---------------|
| C | -7.6031760476 | 0.3254319419  | 3.1524191012  |
| C | -6.7553354562 | -0.4346459666 | 3.9481054519  |
| C | -5.6775393392 | -1.1442812991 | 3.3952067186  |
| C | -5.4523980012 | -1.0736139838 | 2.0360940961  |
| C | -6.2839446386 | -0.2936865297 | 1.2098987569  |
| C | -7.3837988631 | 0.394864811   | 1.7752074977  |
| O | -8.2243960792 | 1.1153087895  | 1.0363939219  |
| O | -6.9240659298 | -0.5365147121 | 5.2848127254  |
| C | -4.3636793982 | -1.8462405571 | 1.3490946951  |
| C | -3.8287780576 | -1.0748510246 | 0.1504574904  |
| O | -4.9203809288 | -0.7275182799 | -0.7334027315 |
| C | -6.0405353616 | -0.1948271637 | -0.2249770129 |
| O | -6.8216436133 | 0.3488591007  | -1.0007681505 |
| C | -3.0193779192 | 0.1640728307  | 0.5300048148  |
| C | -2.1332973562 | 0.7230183814  | -0.5801828581 |
| C | -2.8610842652 | 1.3251304735  | -1.7799338169 |
| C | -1.8447757878 | 1.7814643679  | -2.8244508456 |
| C | -0.8999960618 | 0.6331143669  | -3.1711814605 |
| C | -0.2740269143 | 0.0530696889  | -1.9066763823 |
| O | -1.28023875   | -0.3390503924 | -0.9814413497 |
| C | 0.5820213956  | -1.1699630845 | -2.1669825565 |
| H | -8.4473680543 | 0.8639026826  | 3.5715651353  |
| H | -5.0477804989 | -1.7380801432 | 4.0475282033  |

|   |               |               |               |
|---|---------------|---------------|---------------|
| H | -7.9364778554 | 0.9988760344  | 0.0936470878  |
| H | -7.6910626643 | -0.0115188207 | 5.5490199284  |
| H | -4.7703370086 | -2.803458629  | 0.9980293204  |
| H | -3.5467705464 | -2.0806567319 | 2.0370674559  |
| H | -3.1999421059 | -1.7237924983 | -0.4600832352 |
| H | -3.6825085141 | 0.9498383953  | 0.9071456384  |
| H | -2.3594158312 | -0.1195479291 | 1.3574232223  |
| H | -1.5108974337 | 1.5176602072  | -0.1297067187 |
| H | -3.5343442802 | 0.5785738454  | -2.2110359282 |
| H | -3.4841755005 | 2.1634857442  | -1.4480322231 |
| H | -2.3543583601 | 2.1472774163  | -3.7217651044 |
| H | -1.2616879708 | 2.6242898433  | -2.427682133  |
| H | -1.4548817541 | -0.164293803  | -3.6818282802 |
| H | -0.1085501831 | 0.9674948268  | -3.8517250517 |
| H | 0.3434441419  | 0.837073145   | -1.4326067935 |
| H | 1.4064546879  | -0.9261161116 | -2.84297941   |
| H | -0.0182196909 | -1.9623308024 | -2.6239650999 |
| H | 0.9993267959  | -1.5518184302 | -1.2317141191 |

calc\_lc conf\_8

|   |               |               |               |
|---|---------------|---------------|---------------|
| C | -6.9856162526 | 0.1575908949  | 3.4788579687  |
| C | -6.5784694713 | -1.1438056255 | 3.7427891714  |
| C | -6.0381251518 | -1.9573549777 | 2.7341644408  |
| C | -5.9007019441 | -1.4470504485 | 1.4600888507  |
| C | -6.2858634508 | -0.1241465128 | 1.1702525038  |
| C | -6.8529731106 | 0.6775862115  | 2.1898704217  |
| O | -7.2677901036 | 1.9219310376  | 1.9656507354  |
| O | -6.6847532568 | -1.6949682455 | 4.9714729648  |
| C | -5.394640773  | -2.26848598   | 0.3093142576  |
| C | -4.6464566894 | -1.3988768532 | -0.6924028407 |
| O | -5.4614639182 | -0.2757703277 | -1.0941946833 |
| C | -6.1208891947 | 0.4351522806  | -0.1659722504 |
| O | -6.5670693831 | 1.5297434135  | -0.4954621586 |
| C | -3.2916918106 | -0.9205251665 | -0.187022105  |
| C | -2.5660988184 | 0.0529297556  | -1.1093219318 |
| C | -2.2934708712 | -0.4862845472 | -2.5109547063 |
| C | -1.4335200509 | 0.5016789284  | -3.2989192466 |
| C | -0.1903479769 | 0.8855569129  | -2.4997320882 |
| C | -0.5791750036 | 1.3519347759  | -1.0995655401 |
| O | -1.3498695493 | 0.3547814401  | -0.4440603228 |
| C | 0.6137414547  | 1.6396727064  | -0.2103348142 |
| H | -7.4169512699 | 0.7872538029  | 4.2506851743  |
| H | -5.7446580568 | -2.9720072726 | 2.9770661662  |
| H | -7.1352853293 | 2.0904368491  | 0.9968633383  |
| H | -7.0632054899 | -1.0460544343 | 5.5792563046  |
| H | -6.2467678069 | -2.7394963376 | -0.1970250979 |
| H | -4.7427715048 | -3.0753976167 | 0.6564026603  |
| H | -4.5153618224 | -1.9546758696 | -1.6233349515 |
| H | -3.3998051771 | -0.4454541437 | 0.7938300412  |
| H | -2.6523167342 | -1.7996704413 | -0.0416433313 |
| H | -3.161601521  | 0.9758194891  | -1.202604278  |
| H | -1.7725160376 | -1.4490814966 | -2.4233732062 |
| H | -3.2383369844 | -0.6634345436 | -3.0359856775 |
| H | -1.1558422127 | 0.0792457223  | -4.2703854041 |
| H | -2.0241463308 | 1.4039528456  | -3.5066055377 |
| H | 0.4762944178  | 0.0189404086  | -2.4024214248 |
| H | 0.3728230496  | 1.6746264899  | -3.011098709  |
| H | -1.1942507063 | 2.2646297418  | -1.1928927234 |

|   |              |              |               |
|---|--------------|--------------|---------------|
| H | 0.2823603799 | 1.9551894302 | 0.7821222654  |
| H | 1.2333070029 | 2.4318982586 | -0.6402770912 |
| H | 1.2272774598 | 0.7409894448 | -0.0970971448 |

calc\_1c conf\_9

|   |               |               |               |
|---|---------------|---------------|---------------|
| C | -6.8689042652 | -0.4293935992 | 3.4232670961  |
| C | -5.704460115  | -1.1844858334 | 3.4891072731  |
| C | -4.9549224957 | -1.4711825659 | 2.3380533991  |
| C | -5.3808092852 | -0.9845676491 | 1.1190199024  |
| C | -6.5448239729 | -0.1980769793 | 1.0283306106  |
| C | -7.3063066681 | 0.0629695423  | 2.1924444877  |
| O | -8.4347170771 | 0.7691379673  | 2.1586162041  |
| O | -5.2388038432 | -1.6839221784 | 4.6559546973  |
| C | -4.6753220604 | -1.3000684898 | -0.1677056553 |
| C | -4.806075021  | -0.1478944244 | -1.1523730394 |
| O | -6.1954480017 | 0.2183516099  | -1.3239497908 |
| C | -6.9899397749 | 0.3425085882  | -0.2509173838 |
| O | -8.071073881  | 0.904374939   | -0.4014931338 |
| C | -4.0183645231 | 1.1110228699  | -0.7874037503 |
| C | -2.5127210817 | 1.0759939081  | -1.0368255589 |
| C | -2.1004167431 | 0.8491758819  | -2.4906570696 |
| C | -0.5768559525 | 0.8451432021  | -2.6038215348 |
| C | 0.0216974868  | -0.147766479  | -1.6091077599 |
| C | -0.5108552865 | 0.1095754303  | -0.2021192265 |
| O | -1.9334895405 | 0.0903886376  | -0.1951007321 |
| C | -0.0497090426 | -0.9176479359 | 0.8117824716  |
| H | -7.4610465258 | -0.21659934   | 4.3078679229  |
| H | -4.0568694719 | -2.0709098833 | 2.4278511369  |
| H | -8.6008667113 | 0.9818774124  | 1.203584973   |
| H | -5.8339142811 | -1.4236268634 | 5.3712480533  |
| H | -5.127653405  | -2.1962680065 | -0.6118795394 |
| H | -3.6164290483 | -1.5031043447 | -0.0006070384 |
| H | -4.5203709738 | -0.4862948675 | -2.1498045671 |
| H | -4.4317942006 | 1.9343208444  | -1.3796643728 |
| H | -4.1893218427 | 1.3545396314  | 0.2665453575  |
| H | -2.1207584794 | 2.0626394821  | -0.7315190792 |
| H | -2.4906495907 | -0.1145929201 | -2.8384210875 |
| H | -2.5381881447 | 1.6273624533  | -3.1259805796 |
| H | -0.2659406605 | 0.6043774967  | -3.6256673052 |
| H | -0.1947807229 | 1.8521075419  | -2.3881929585 |
| H | -0.245266612  | -1.1726233414 | -1.8978001599 |
| H | 1.1157691389  | -0.0858503104 | -1.6059324229 |
| H | -0.1804651521 | 1.1131471298  | 0.1191493566  |
| H | -0.3649547574 | -1.9209056341 | 0.5092787344  |
| H | -0.4786563626 | -0.7037756904 | 1.7939230366  |
| H | 1.0404789487  | -0.9104572325 | 0.8979190325  |

calc\_1c conf\_10

|   |               |               |              |
|---|---------------|---------------|--------------|
| C | -7.8142626654 | -0.1171483809 | 3.4386800573 |
| C | -6.731993722  | -0.6762385619 | 4.1067375596 |
| C | -5.5151254059 | -0.9170690674 | 3.4497523606 |
| C | -5.4000527468 | -0.6053421317 | 2.1107388742 |
| C | -6.4883122388 | -0.0575853259 | 1.4044364785 |
| C | -7.6995455244 | 0.2113825957  | 2.0870204945 |
| O | -8.7445374101 | 0.7710670823  | 1.4821588569 |
| O | -6.7889928932 | -1.0094520591 | 5.4144877322 |
| C | -4.1217254732 | -0.7912853818 | 1.3430891768 |



|   |               |               |               |
|---|---------------|---------------|---------------|
| C | -4.4404392763 | -1.126548554  | -0.104499541  |
| O | -5.2793794794 | -0.1020776321 | -0.6796096246 |
| C | -6.3772458026 | 0.2830035016  | -0.0091187135 |
| O | -7.2315895161 | 0.9177856574  | -0.6185326807 |
| C | -3.2445698577 | -1.3262504495 | -1.0208871702 |
| C | -2.1973144297 | -0.2181132527 | -1.097713709  |
| C | -2.6483623944 | 1.0440759663  | -1.8274073558 |
| C | -1.4779790369 | 2.012666571   | -1.9884923545 |
| C | -0.2820399582 | 1.3025054209  | -2.6180524729 |
| C | 0.0463241459  | 0.0279168334  | -1.8464316446 |
| O | -1.0946640433 | -0.8141172994 | -1.7657427923 |
| C | 1.1504356045  | -0.7915101817 | -2.4838168099 |
| H | -8.7522058092 | 0.0879823435  | 3.945019922   |
| H | -4.6897402406 | -1.3419022623 | 4.0092416029  |
| H | -8.4526543956 | 0.9856148439  | 0.5588190458  |
| H | -7.6682386042 | -0.8023198196 | 5.7577358661  |
| H | -3.5125288721 | -1.5877366678 | 1.7807187828  |
| H | -3.5305137523 | 0.1315318357  | 1.3916737719  |
| H | -5.027797957  | -2.0540881334 | -0.1186815891 |
| H | -2.7275147869 | -2.2332849566 | -0.6881912608 |
| H | -3.6154713218 | -1.5311445826 | -2.0306726762 |
| H | -1.8712730217 | 0.0602177985  | -0.079182751  |
| H | -3.0315673744 | 0.7522032607  | -2.8128581433 |
| H | -3.4771656851 | 1.5151918994  | -1.2925394618 |
| H | -1.7775212933 | 2.8767943262  | -2.5905703937 |
| H | -1.1898542568 | 2.4037686951  | -1.0027809578 |
| H | -0.5138061403 | 1.0282708272  | -3.6550640647 |
| H | 0.5961621589  | 1.9579795264  | -2.6418030221 |
| H | 0.3456325173  | 0.3089354341  | -0.8201622531 |
| H | 2.0766610047  | -0.2124803747 | -2.540228559  |
| H | 0.8641107432  | -1.0888132268 | -3.4969418432 |
| H | 1.339659211   | -1.6973861174 | -1.9023287373 |

calc\_1c conf\_11

|   |               |               |               |
|---|---------------|---------------|---------------|
| C | -7.3872487536 | 0.6971484287  | 2.2474686633  |
| C | -6.7090704648 | 0.486869927   | 3.4411119493  |
| C | -5.568408246  | -0.3288559026 | 3.4966846151  |
| C | -5.1079415417 | -0.921271148  | 2.3382459526  |
| C | -5.7634176995 | -0.7067051082 | 1.1115031644  |
| C | -6.9295666799 | 0.0936298199  | 1.0742995191  |
| O | -7.6142073876 | 0.2955122677  | -0.0489962151 |
| O | -7.1108565206 | 1.0462069742  | 4.6044516561  |
| C | -3.9279206329 | -1.8514033386 | 2.3191912328  |
| C | -3.1907545166 | -1.7423671212 | 0.9915213522  |
| O | -4.1002896254 | -1.9577573781 | -0.1046875089 |
| C | -5.2775282371 | -1.318593504  | -0.1214852795 |
| O | -5.9159248761 | -1.3087353142 | -1.1691882826 |
| C | -2.4223187097 | -0.4289558411 | 0.8433102566  |
| C | -1.9266493581 | -0.141310583  | -0.5689554581 |
| C | -0.7083687372 | 0.7786797578  | -0.6046286239 |
| C | -0.3473036668 | 1.1154496266  | -2.0512199687 |
| C | -1.5736927815 | 1.6253030264  | -2.8079791976 |
| C | -2.7492369759 | 0.6658156855  | -2.6401381117 |
| O | -3.0078680709 | 0.4585268846  | -1.2579041954 |
| C | -4.0382175988 | 1.1676355286  | -3.2574920396 |
| H | -8.2792669553 | 1.3139385067  | 2.1998678441  |
| H | -5.0750153622 | -0.4801479475 | 4.4498544103  |
| H | -7.1709064594 | -0.2539912262 | -0.7464911684 |

|   |               |               |               |
|---|---------------|---------------|---------------|
| H | -7.8978649992 | 1.582810683   | 4.4423906829  |
| H | -4.2765005184 | -2.8834144345 | 2.4519725293  |
| H | -3.2428021688 | -1.6349171684 | 3.144348501   |
| H | -2.4888092044 | -2.5740704537 | 0.8887996628  |
| H | -3.0410162974 | 0.4187551753  | 1.1561717818  |
| H | -1.5711452428 | -0.4780010733 | 1.533014667   |
| H | -1.6646714413 | -1.089948618  | -1.0711326047 |
| H | -0.9496361484 | 1.696279248   | -0.0529973386 |
| H | 0.1372409281  | 0.3018007796  | -0.0949175416 |
| H | 0.4627589518  | 1.8517968904  | -2.0851836641 |
| H | 0.0313356634  | 0.2103049924  | -2.5454647443 |
| H | -1.8727802324 | 2.6065088313  | -2.41785612   |
| H | -1.3461473486 | 1.7533899629  | -3.8724364276 |
| H | -2.482907864  | -0.3050254326 | -3.0930666782 |
| H | -3.9192733478 | 1.3091271017  | -4.3356781876 |
| H | -4.32520445   | 2.1247406021  | -2.8113710536 |
| H | -4.8405964223 | 0.4482408927  | -3.0799380308 |

calc\_lc conf\_12

|   |               |               |               |
|---|---------------|---------------|---------------|
| C | -7.7554800982 | -1.076401486  | 3.1647219607  |
| C | -6.992884387  | -0.3442361131 | 4.0661564858  |
| C | -5.9190777476 | 0.4497990563  | 3.6358204564  |
| C | -5.6091291491 | 0.4905741566  | 2.2913531965  |
| C | -6.3517341484 | -0.2580975765 | 1.3599795257  |
| C | -7.4528899573 | -1.0294706247 | 1.8027294695  |
| O | -8.2181543983 | -1.7190950571 | 0.9599995766  |
| O | -7.245996174  | -0.3530580054 | 5.3939618873  |
| C | -4.4987117409 | 1.3404922478  | 1.7430497111  |
| C | -3.8945641329 | 0.6863000627  | 0.5112480907  |
| O | -4.9247676238 | 0.4169281228  | -0.4607402284 |
| C | -6.0394299564 | -0.2104642256 | -0.0653881499 |
| O | -6.7643005591 | -0.7020957039 | -0.924880518  |
| C | -2.8429918382 | 1.5508817007  | -0.1767673121 |
| C | -1.7302467089 | 0.7658888841  | -0.8562982359 |
| C | -0.7129177944 | 1.6671243198  | -1.552340015  |
| C | 0.3229697825  | 0.8222979125  | -2.2923133483 |
| C | -0.3729693061 | -0.1941219617 | -3.1958788064 |
| C | -1.4073909804 | -0.9947491491 | -2.4091335278 |
| O | -2.3313510687 | -0.1209805709 | -1.7752043455 |
| C | -2.2204225349 | -1.9377413861 | -3.2724969514 |
| H | -8.5980976549 | -1.6790328488 | 3.4890878046  |
| H | -5.3557515562 | 1.0160590259  | 4.3685672093  |
| H | -7.8876846887 | -1.5073893356 | 0.0478755531  |
| H | -8.0016475537 | -0.9293592091 | 5.5684700926  |
| H | -3.7195646464 | 1.494027713   | 2.4958139564  |
| H | -4.8844828302 | 2.3324226376  | 1.4703507895  |
| H | -3.4608876599 | -0.2810644272 | 0.7947156523  |
| H | -3.3501888017 | 2.1852483388  | -0.911085202  |
| H | -2.3835126035 | 2.2150131382  | 0.5644925283  |
| H | -1.1983086141 | 0.1729605143  | -0.0869788021 |
| H | -1.248590126  | 2.3074600693  | -2.26443437   |
| H | -0.2298811926 | 2.3237321562  | -0.8192672594 |
| H | 0.9968231872  | 1.4607744428  | -2.8732475921 |
| H | 0.9472105879  | 0.2913848542  | -1.5606346516 |
| H | -0.8892009494 | 0.3245474874  | -4.0135721695 |
| H | 0.3558114797  | -0.8752124811 | -3.6497584055 |
| H | -0.8810984604 | -1.5728175375 | -1.6278226659 |
| H | -2.9632575371 | -2.4630023774 | -2.6675126166 |

H -1.5723211731 -2.6756583151 -3.7540959483  
H -2.7499286848 -1.3778684491 -4.0485428248

calc\_1c conf\_13

C -7.5876889952 -0.75212149 3.6003755176  
C -6.4039861811 -0.2923254145 4.1640807557  
C -5.3647603653 0.2124762422 3.3668373806  
C -5.5207523925 0.2385247063 1.9962927764  
C -6.7013056557 -0.2409229757 1.3982668758  
C -7.7547038856 -0.7175730894 2.2148569976  
O -8.9098697052 -1.1390445035 1.7058023341  
O -6.1930298854 -0.3006420637 5.4985429105  
C -4.4793377299 0.8003479163 1.0713453312  
C -4.500071867 0.0558394954 -0.2529277424  
O -5.8284318577 0.1172370981 -0.8196274457  
C -6.8780525724 -0.2079230119 -0.0491264975  
O -7.9459901992 -0.450320747 -0.6016506992  
C -3.5589573998 0.609337958 -1.3171803764  
C -2.2179067341 -0.1088318282 -1.4247805068  
C -1.3411221888 -0.0449418615 -0.1757097305  
C 0.027524079 -0.6674851844 -0.4509651684  
C 0.6481924817 -0.055294117 -1.7041825517  
C -0.3314246474 -0.125569162 -2.8716478805  
O -1.5608638933 0.495874167 -2.5236881686  
C 0.1719781246 0.5696308034 -4.1203823341  
H -8.4019015928 -1.1277113103 4.2121577377  
H -4.4623725522 0.5752070431 3.8452910125  
H -8.8601120187 -0.9777850675 0.728149615  
H -6.9706364404 -0.6656978582 5.9410167731  
H -3.4846058041 0.7469258513 1.5208331594  
H -4.6868589375 1.8613502792 0.8775476941  
H -4.2850863798 -1.0068941358 -0.0735776749  
H -4.0563337132 0.5160638809 -2.2862560329  
H -3.3798662784 1.6781409262 -1.1545886417  
H -2.40529334 -1.1727179598 -1.6614078335  
H -1.2221304934 1.007200512 0.1141639831  
H -1.8286388605 -0.5655096148 0.6567744155  
H 0.687756108 -0.5392888797 0.413132384  
H -0.0916106235 -1.7496781603 -0.5967017253  
H 0.8959787855 0.9983924324 -1.5232101015  
H 1.5792796101 -0.5691433027 -1.9686057836  
H -0.5291818774 -1.188331207 -3.0993345796  
H 1.1017539361 0.1109582797 -4.4687752219  
H 0.3612653452 1.6272921883 -3.9150173331  
H -0.5708434027 0.503953165 -4.9191236244

calc\_1c conf\_14

C -7.5733800752 -0.7023863918 3.5974068427  
C -6.3252261167 -0.395695361 4.1248720588  
C -5.2674923663 0.0177608288 3.300350087  
C -5.471195805 0.1080926105 1.9385696797  
C -6.7197147351 -0.2167284369 1.3762415492  
C -7.7877114395 -0.6024370734 2.2217559714  
O -9.00107192 -0.8775805101 1.7494866918  
O -6.065666302 -0.4731802236 5.4485084998  
C -4.4025794642 0.5790539613 0.9930275878  
C -4.5655832768 -0.0945157505 -0.3580337456

|   |               |               |               |
|---|---------------|---------------|---------------|
| O | -5.8997517934 | 0.121254373   | -0.8637110639 |
| C | -6.9476977915 | -0.1167596389 | -0.0607707991 |
| O | -8.0559496641 | -0.225230449  | -0.5746636186 |
| C | -3.6363587575 | 0.3955548945  | -1.4562097063 |
| C | -2.1552973725 | 0.0978554398  | -1.2102983625 |
| C | -1.365437261  | 1.2724555835  | -0.6332301026 |
| C | 0.1148752444  | 0.917262145   | -0.5180111701 |
| C | 0.6354984288  | 0.4033523203  | -1.8579598968 |
| C | -0.2575444349 | -0.7154983384 | -2.3861522215 |
| O | -1.609921962  | -0.2842418995 | -2.4628422418 |
| C | 0.129816985   | -1.1875091392 | -3.7729949946 |
| H | -8.4004955213 | -1.0074719903 | 4.2307007129  |
| H | -4.312204918  | 0.2600843675  | 3.7515215502  |
| H | -8.9711514622 | -0.6925739986 | 0.7752526955  |
| H | -6.8609006243 | -0.7680059998 | 5.9115858052  |
| H | -3.4110520465 | 0.3614509599  | 1.3998986448  |
| H | -4.4698541895 | 1.6676763156  | 0.8629069687  |
| H | -4.4405776143 | -1.178610703  | -0.2316617599 |
| H | -3.9237997697 | -0.1118868741 | -2.3809081786 |
| H | -3.7982296571 | 1.4676580393  | -1.615069502  |
| H | -2.062286095  | -0.7608320793 | -0.5174839976 |
| H | -1.491554523  | 2.1278244449  | -1.3087299258 |
| H | -1.7719055099 | 1.5680806673  | 0.3402012334  |
| H | 0.693895865   | 1.784317615   | -0.1832273303 |
| H | 0.2448880605  | 0.1393790755  | 0.2468853728  |
| H | 0.6413626687  | 1.2180576383  | -2.5931913444 |
| H | 1.6653783363  | 0.040749328   | -1.764443093  |
| H | -0.2037728949 | -1.5657339057 | -1.6821257951 |
| H | 0.0661311815  | -0.3602808296 | -4.4858858944 |
| H | -0.5430733671 | -1.9804818438 | -4.1084663009 |
| H | 1.1535919605  | -1.5722791717 | -3.7771009062 |

calc\_lc conf\_15

|   |               |               |               |
|---|---------------|---------------|---------------|
| C | -5.6452403417 | 0.0011588026  | 3.2361232899  |
| C | -4.9803158058 | -1.2133821803 | 3.1145861631  |
| C | -4.8440134971 | -1.8471819548 | 1.8719540301  |
| C | -5.3689850325 | -1.246760015  | 0.744456258   |
| C | -6.0448120497 | -0.0178704019 | 0.8394844386  |
| C | -6.1940326004 | 0.6044191006  | 2.104218892   |
| O | -6.8445417079 | 1.7560779775  | 2.2556854115  |
| O | -4.4373926237 | -1.8439245536 | 4.1803779778  |
| C | -5.3256118477 | -1.9174486302 | -0.5976784524 |
| C | -5.4227836725 | -0.942643589  | -1.7682994169 |
| O | -6.4169373949 | 0.0817504405  | -1.5454553435 |
| C | -6.6234139222 | 0.618471764   | -0.3373011381 |
| O | -7.31627364   | 1.6308884633  | -0.2774218802 |
| C | -4.1267740158 | -0.2907634005 | -2.2490689689 |
| C | -3.250126171  | 0.4265082167  | -1.2320803626 |
| C | -2.2707700558 | 1.3866585271  | -1.9047318265 |
| C | -1.3202205944 | 1.9867362934  | -0.8721463654 |
| C | -0.6702707667 | 0.8786248785  | -0.0477406463 |
| C | -1.7262876376 | -0.0599440403 | 0.5301966342  |
| O | -2.5521107183 | -0.5758403429 | -0.5086585917 |
| C | -1.1227456397 | -1.2499916936 | 1.2481929093  |
| H | -5.7652946259 | 0.4926736927  | 4.196523834   |
| H | -4.33135889   | -2.8005279071 | 1.8193865411  |
| H | -7.1983088113 | 1.9952639619  | 1.3590350368  |
| H | -4.6018385092 | -1.3202445583 | 4.9755507312  |

|   |               |               |               |
|---|---------------|---------------|---------------|
| H | -6.1706821107 | -2.6153539598 | -0.6552343371 |
| H | -4.4106201698 | -2.5052082119 | -0.699138263  |
| H | -5.8283326831 | -1.4848024775 | -2.6264014019 |
| H | -3.5113970077 | -1.0661409956 | -2.7209983853 |
| H | -4.4099500168 | 0.415255598   | -3.0370939258 |
| H | -3.872514488  | 1.0058082834  | -0.5299534479 |
| H | -1.7016912406 | 0.8323076989  | -2.6625746346 |
| H | -2.8282662102 | 2.1738738366  | -2.4244944097 |
| H | -0.5590524531 | 2.6042754111  | -1.3605182109 |
| H | -1.8847617946 | 2.6525600899  | -0.2055919567 |
| H | 0.004654567   | 0.2889595117  | -0.6814446276 |
| H | -0.0681523362 | 1.2998250161  | 0.7653790677  |
| H | -2.3630786759 | 0.5069394705  | 1.2306174083  |
| H | -0.5243806471 | -1.8467982667 | 0.5531955723  |
| H | -1.906767138  | -1.8845869024 | 1.6665307101  |
| H | -0.4755470233 | -0.9166229531 | 2.0645316871  |

calc\_lc conf\_16

|   |               |               |               |
|---|---------------|---------------|---------------|
| C | -7.6970936644 | -1.0327655031 | 3.4056697935  |
| C | -7.2957565351 | 0.1459129588  | 4.0194291181  |
| C | -6.3227341141 | 0.9754952298  | 3.4384973739  |
| C | -5.745787238  | 0.6060001776  | 2.2379694291  |
| C | -6.1217439544 | -0.5908394128 | 1.6059647122  |
| C | -7.1266656423 | -1.4050417033 | 2.1896816188  |
| O | -7.5479868748 | -2.5259727063 | 1.6090986102  |
| O | -7.8844207181 | 0.4600069282  | 5.1952453212  |
| C | -4.7268673322 | 1.4566122056  | 1.534317051   |
| C | -3.7674468303 | 0.5777788745  | 0.7482121154  |
| O | -4.496860211  | -0.2774632951 | -0.1476525793 |
| C | -5.5293171268 | -0.985696464  | 0.3314822943  |
| O | -5.9413753143 | -1.9285604322 | -0.33573616   |
| C | -2.7629971579 | 1.3728195972  | -0.0690974554 |
| C | -1.7690767874 | 0.5394525523  | -0.8737773464 |
| C | -0.473524346  | 1.2928236955  | -1.1762410748 |
| C | 0.4303286901  | 0.4511267895  | -2.0773040566 |
| C | -0.340389821  | -0.0444104268 | -3.3004597648 |
| C | -1.6424335552 | -0.7173525514 | -2.8751113576 |
| O | -2.409574865  | 0.1716124074  | -2.0770873275 |
| C | -2.5224601513 | -1.1297619392 | -4.0372352345 |
| H | -8.4591568035 | -1.6548229317 | 3.857578025   |
| H | -6.0289654518 | 1.900469672   | 3.9285266161  |
| H | -7.0785137574 | -2.5851711559 | 0.7377723687  |
| H | -7.5321029101 | 1.301851983   | 5.5113502679  |
| H | -4.1679157455 | 2.0693349869  | 2.2483119707  |
| H | -5.2291131249 | 2.1443557802  | 0.8407615467  |
| H | -3.2292358446 | -0.0760198131 | 1.4490841849  |
| H | -3.2921545309 | 2.034080501   | -0.7639084122 |
| H | -2.2124125733 | 2.0092959106  | 0.633966911   |
| H | -1.5143169241 | -0.3747997498 | -0.3061458251 |
| H | -0.7305701611 | 2.2350587354  | -1.6771818884 |
| H | 0.0402174503  | 1.547638504   | -0.2415798099 |
| H | 1.313198182   | 1.0242883848  | -2.3798578701 |
| H | 0.7985112297  | -0.4135076911 | -1.508222886  |
| H | -0.587959686  | 0.8008997238  | -3.9549953859 |
| H | 0.2688702965  | -0.7427929422 | -3.8855043046 |
| H | -1.3975969153 | -1.6083616805 | -2.2699480842 |
| H | -2.0081410489 | -1.856083371  | -4.6731954938 |
| H | -2.7818831753 | -0.2574558564 | -4.6445001205 |

H -3.4475749564 -1.5770359723 -3.6661768909

calc\_1c conf\_17

C -6.8324690593 0.3461196024 3.4544488479  
C -5.7402888705 -0.4567041367 3.7571197673  
C -5.0605901875 -1.169668687 2.7565514605  
C -5.4821835392 -1.0575541762 1.4473963146  
C -6.5727494383 -0.234279119 1.1107411415  
C -7.2677491785 0.4563381737 2.1320356094  
O -8.3298142699 1.2162381539 1.8777291939  
O -5.2810928226 -0.600056364 5.0196997922  
C -4.8565079863 -1.8287230862 0.3219664041  
C -4.9081877577 -1.0296772588 -0.9728549898  
O -6.2660496571 -0.627097022 -1.2522471201  
C -7.0131138112 -0.0942141041 -0.2739592458  
O -8.0484634397 0.4825280724 -0.5904940783  
C -4.0060542685 0.1996966511 -1.031750653  
C -2.5099508017 -0.1279563527 -0.9898898105  
C -1.8463813647 0.1855524098 0.349455598  
C -0.3456131482 -0.0862940938 0.2789388303  
C 0.2619511994 0.6412261102 -0.9189697901  
C -0.516101759 0.3247490159 -2.1939154994  
O -1.89581923 0.6204284572 -2.0261434256  
C -0.0420113902 1.1163443127 -3.3960166643  
H -7.3724267928 0.8875158809 4.2249279272  
H -4.2251942463 -1.8016729543 3.0353098008  
H -8.5117339748 1.1257977765 0.9062217641  
H -5.8238526947 -0.0689581263 5.6172573458  
H -5.4095506391 -2.7654553043 0.1761715409  
H -3.8242372366 -2.1058838976 0.5532870344  
H -4.6610961228 -1.6853164475 -1.8118479233  
H -4.2066227386 0.7073024401 -1.9788817256  
H -4.2706113875 0.8952781889 -0.2280564827  
H -2.3597245461 -1.2031530944 -1.2100350126  
H -2.0235238028 1.2449779888 0.5729397784  
H -2.3159128449 -0.3919074287 1.1538925292  
H 0.1464559349 0.2187738202 1.2083707774  
H -0.1754003082 -1.1667397111 0.173835415  
H 0.2267425334 1.7254453535 -0.7530246765  
H 1.314443483 0.3657647388 -1.0507622192  
H -0.4156000904 -0.755653728 -2.4046861512  
H 1.010121608 0.9045714548 -3.6067488513  
H -0.1504192834 2.1887002991 -3.209216362  
H -0.6336160697 0.8616161922 -4.2787961913

calc\_1c conf\_18

C -6.8886100406 0.1203256729 3.5431486779  
C -5.863528391 -0.7819705815 3.7966693068  
C -5.1861511564 -1.4285799533 2.7506346726  
C -5.5416493181 -1.1509167021 1.4466789915  
C -6.5616138738 -0.2247674914 1.1621798763  
C -7.2561643939 0.3996037621 2.2253395468  
O -8.2556178292 1.2525615125 2.0147909264  
O -5.4698868769 -1.088328272 5.0524311328  
C -4.9092795374 -1.8392143245 0.2707195749  
C -4.8559996777 -0.9049410321 -0.931580941  
O -6.1802989091 -0.397538463 -1.2136434328

|   |               |               |               |
|---|---------------|---------------|---------------|
| C | -6.9316791848 | 0.0863360387  | -0.2135434502 |
| O | -7.9124792292 | 0.7622412911  | -0.5072156863 |
| C | -3.8736266878 | 0.2625949024  | -0.7999774945 |
| C | -2.498764146  | 0.0155523162  | -1.4150432301 |
| C | -1.6881811302 | -1.1121258373 | -0.7792858036 |
| C | -0.2805595757 | -1.1614923323 | -1.3737582663 |
| C | 0.373570773   | 0.2162437803  | -1.311393632  |
| C | -0.543430421  | 1.2676597915  | -1.9286734524 |
| O | -1.8140079908 | 1.2490681274  | -1.2931365226 |
| C | -0.0101250542 | 2.6799006165  | -1.7983419393 |
| H | -7.4262302758 | 0.6126183196  | 4.347438975   |
| H | -4.4013774553 | -2.1368545815 | 2.9899572661  |
| H | -8.3989720247 | 1.2779094191  | 1.0332615049  |
| H | -6.0014474743 | -0.5852392857 | 5.6833521011  |
| H | -5.5038688962 | -2.7231984248 | 0.0068057532  |
| H | -3.9053631681 | -2.19023005   | 0.5204540324  |
| H | -4.6224972435 | -1.4789065822 | -1.8326244813 |
| H | -4.3000364804 | 1.1245354791  | -1.3207876473 |
| H | -3.7481085408 | 0.5529857729  | 0.248853905   |
| H | -2.6287757183 | -0.2151135368 | -2.4890667716 |
| H | -1.6320447393 | -0.9352035583 | 0.3026414039  |
| H | -2.1924135743 | -2.0735303535 | -0.9320885185 |
| H | 0.3293836603  | -1.9065214203 | -0.8521892537 |
| H | -0.3430032233 | -1.4855277417 | -2.4215077262 |
| H | 0.5649366211  | 0.4941717696  | -0.2671695205 |
| H | 1.3385838889  | 0.2125868129  | -1.8307034496 |
| H | -0.683620743  | 1.02628219    | -2.9976720242 |
| H | 0.9559028088  | 2.7753056981  | -2.3022964189 |
| H | 0.1203198545  | 2.9389020864  | -0.7436010599 |
| H | -0.7082846255 | 3.393815165   | -2.2420569248 |

calc\_lc conf\_19

|   |               |               |               |
|---|---------------|---------------|---------------|
| C | -5.8220617114 | 0.4257152175  | 3.2700119386  |
| C | -5.3669409366 | -0.8822096315 | 3.3816304109  |
| C | -5.2990986331 | -1.7277279634 | 2.2636291317  |
| C | -5.6830540902 | -1.2424507378 | 1.0295729054  |
| C | -6.1310747832 | 0.0821912773  | 0.8851860026  |
| C | -6.2169063299 | 0.918866311   | 2.0249935204  |
| O | -6.6576640019 | 2.1719522791  | 1.9534614796  |
| O | -4.9746074424 | -1.4079055289 | 4.5624378004  |
| C | -5.7169400373 | -2.1060117794 | -0.1970776081 |
| C | -5.4856545102 | -1.3209159775 | -1.4864543664 |
| O | -6.2673615241 | -0.1071500606 | -1.5209106143 |
| C | -6.4952357616 | 0.6182724568  | -0.4204274528 |
| O | -7.000131122  | 1.728639518   | -0.5664479712 |
| C | -4.0285479236 | -1.063201722  | -1.8656220836 |
| C | -3.1104849428 | -0.3080417256 | -0.9036066227 |
| C | -3.174519606  | 1.2123902346  | -1.0324398744 |
| C | -2.1209364887 | 1.8668347312  | -0.1413068939 |
| C | -0.7448794928 | 1.2680986366  | -0.4217767142 |
| C | -0.7987947023 | -0.2551236125 | -0.3479681887 |
| O | -1.7994083496 | -0.762943304  | -1.2193263347 |
| C | 0.5043862402  | -0.9203153639 | -0.7436575709 |
| H | -5.8889890906 | 1.0814663587  | 4.1324413969  |
| H | -4.9529384837 | -2.7465836881 | 2.3931976054  |
| H | -6.9219121013 | 2.320854311   | 1.0077780939  |
| H | -5.069585019  | -0.7406353947 | 5.2548937519  |
| H | -6.703933112  | -2.5826215786 | -0.2526056661 |

|   |               |               |               |
|---|---------------|---------------|---------------|
| H | -4.9820848158 | -2.9133886712 | -0.1293785311 |
| H | -5.9098991254 | -1.8998168655 | -2.3107166667 |
| H | -3.5745379888 | -2.0493894342 | -2.0174400671 |
| H | -4.0160370756 | -0.5644546317 | -2.8410541772 |
| H | -3.3323903835 | -0.5924093831 | 0.1381005922  |
| H | -2.9864430605 | 1.4688833388  | -2.082776275  |
| H | -4.1706742039 | 1.5895573629  | -0.7868189723 |
| H | -2.1103873136 | 2.9509631248  | -0.294644619  |
| H | -2.3852423776 | 1.7023187332  | 0.9121185611  |
| H | -0.4120960296 | 1.5536172647  | -1.4279497381 |
| H | -0.0001200193 | 1.6466038719  | 0.2877939599  |
| H | -1.0574674878 | -0.5454952485 | 0.6864404525  |
| H | 1.316034863   | -0.6021859484 | -0.0830602498 |
| H | 0.7683561295  | -0.6544327596 | -1.7714919904 |
| H | 0.412262845   | -2.0078140177 | -0.684728355  |

calc\_lc conf\_20

|   |               |               |               |
|---|---------------|---------------|---------------|
| C | -5.3228270666 | 0.1299785607  | 3.1837958212  |
| C | -4.8788123361 | -1.1853989271 | 3.2527719082  |
| C | -4.8434312658 | -1.9983539649 | 2.1118857781  |
| C | -5.2521951506 | -1.4766325296 | 0.8975547512  |
| C | -5.7009346062 | -0.151938334  | 0.8002173014  |
| C | -5.7474353459 | 0.6540390351  | 1.9616352565  |
| O | -6.1791847385 | 1.9148532518  | 1.9309764591  |
| O | -4.4650927443 | -1.7451301314 | 4.4124558595  |
| C | -5.3002876191 | -2.3162062232 | -0.3458330895 |
| C | -5.2210515262 | -1.5088411873 | -1.6417730749 |
| O | -6.038037734  | -0.325167386  | -1.586901011  |
| C | -6.1397421049 | 0.4086856377  | -0.4745782182 |
| O | -6.6549951493 | 1.5180035292  | -0.5682855451 |
| C | -3.8470487928 | -1.1837714502 | -2.2425616561 |
| C | -2.7841250168 | -0.3851772435 | -1.4896831631 |
| C | -2.0682836814 | -1.1066131775 | -0.3488248811 |
| C | -1.033707589  | -0.1731747657 | 0.2790382276  |
| C | -1.688108781  | 1.1524915544  | 0.6640362304  |
| C | -2.4253196751 | 1.7540128689  | -0.5290367076 |
| O | -3.3683795064 | 0.8247009461  | -1.0507188596 |
| C | -3.1871149177 | 3.0199963299  | -0.1933194273 |
| H | -5.3639644364 | 0.7648034998  | 4.0634334456  |
| H | -4.4993332801 | -3.0222576125 | 2.2047128349  |
| H | -6.4832062745 | 2.0774146457  | 0.9975854015  |
| H | -4.5419472577 | -1.0946665648 | 5.122694489   |
| H | -6.2527528889 | -2.8615928698 | -0.3458782885 |
| H | -4.5115599048 | -3.074485268  | -0.3378056052 |
| H | -5.7183292052 | -2.1014445848 | -2.4149796253 |
| H | -3.3963748581 | -2.1386273823 | -2.5419803771 |
| H | -4.0647556768 | -0.6410862139 | -3.1685885249 |
| H | -2.0107643908 | -0.1421339534 | -2.2428528478 |
| H | -2.7902699972 | -1.4090868398 | 0.4148072219  |
| H | -1.5877645919 | -2.0141710012 | -0.7339935046 |
| H | -0.5702968744 | -0.6449088873 | 1.1518564596  |
| H | -0.2269218866 | 0.0156327922  | -0.4427719587 |
| H | -2.4124943744 | 0.9911479754  | 1.4719674735  |
| H | -0.9400352192 | 1.8644967557  | 1.030903464   |
| H | -1.6872853645 | 1.9708618765  | -1.3223682758 |
| H | -2.4988742266 | 3.800144242   | 0.1448652564  |
| H | -3.916587253  | 2.8340486892  | 0.5994483356  |
| H | -3.7253666914 | 3.3835543077  | -1.0719073341 |



**Table S32.** Sampled and DFT geometry optimized conformers related to calc\_1d, with energy values (Hartree) and related % contribution on the final Boltzmann distribution for the three employed functional/basis set combinations.

| Conformer       | MPW1PW91/6-31g(d,p) |                                              | MPW1PW91/6-311+g(d,p) |                                              | B97-2/cc-pVTZ    |                                              |
|-----------------|---------------------|----------------------------------------------|-----------------------|----------------------------------------------|------------------|----------------------------------------------|
|                 | Energy (Hartree)    | % contribution on the Boltzmann distribution | Energy (Hartree)      | % contribution on the Boltzmann distribution | Energy (Hartree) | % contribution on the Boltzmann distribution |
| calc_1d conf_1  | -997.7145519        | 69.45%                                       | -997.9497948          | 79.39%                                       | -997.9088768     | 81.25%                                       |
| calc_1d conf_2  | -997.7129280        | 12.44%                                       | -997.9478343          | 9.95%                                        | -997.9065739     | 7.09%                                        |
| calc_1d conf_3  | -997.7129263        | 12.41%                                       | -997.9475148          | 7.10%                                        | -997.9066714     | 7.86%                                        |
| calc_1d conf_4  | -997.7111995        | 1.99%                                        | -997.9458455          | 1.21%                                        | -997.9044298     | 0.73%                                        |
| calc_1d conf_5  | -997.7111538        | 1.90%                                        | -997.9459094          | 1.30%                                        | -997.9053266     | 1.89%                                        |
| calc_1d conf_6  | -997.7100113        | 0.57%                                        | -997.9439393          | 0.16%                                        | -997.9026267     | 0.11%                                        |
| calc_1d conf_7  | -997.7096731        | 0.40%                                        | -997.9447707          | 0.39%                                        | -997.9042392     | 0.60%                                        |
| calc_1d conf_8  | -997.7092679        | 0.26%                                        | -997.9439922          | 0.17%                                        | -997.9027621     | 0.13%                                        |
| calc_1d conf_9  | -997.7085747        | 0.12%                                        | -997.9430913          | 0.07%                                        | -997.9020797     | 0.06%                                        |
| calc_1d conf_10 | -997.7083106        | 0.09%                                        | -997.9431711          | 0.07%                                        | -997.9022704     | 0.07%                                        |
| calc_1d conf_11 | -997.7080874        | 0.07%                                        | -997.9423688          | 0.03%                                        | -997.9018509     | 0.05%                                        |
| calc_1d conf_12 | -997.7077698        | 0.05%                                        | -997.9428325          | 0.05%                                        | -997.9017539     | 0.04%                                        |
| calc_1d conf_13 | -997.7075785        | 0.04%                                        | -997.9414658          | 0.01%                                        | -997.8999649     | 0.01%                                        |
| calc_1d conf_14 | -997.7075210        | 0.04%                                        | -997.9409407          | 0.01%                                        | -997.8992183     | 0.00%                                        |
| calc_1d conf_15 | -997.7074126        | 0.04%                                        | -997.9424322          | 0.03%                                        | -997.9016501     | 0.04%                                        |
| calc_1d conf_16 | -997.7073787        | 0.03%                                        | -997.9420120          | 0.02%                                        | -997.9011330     | 0.02%                                        |
| calc_1d conf_17 | -997.7072016        | 0.03%                                        | -997.9414065          | 0.01%                                        | -997.8996308     | 0.00%                                        |
| calc_1d conf_18 | -997.7069172        | 0.02%                                        | -997.9418101          | 0.02%                                        | -997.9008934     | 0.02%                                        |
| calc_1d conf_19 | -997.7069151        | 0.02%                                        | -997.9415833          | 0.01%                                        | -997.9003288     | 0.01%                                        |
| calc_1d conf_20 | -997.7067265        | 0.02%                                        | -997.9411055          | 0.01%                                        | -997.9009285     | 0.02%                                        |
| calc_1d conf_21 | -997.7031610        | 0.00%                                        | -997.9385785          | 0.00%                                        | -997.8966992     | 0.00%                                        |

**Table S33.** Cartesian coordinates of the optimized geometries for the conformers related to calc\_1d. The related energies and % contribution on the final Boltzmann distribution for the three employed functional/basis set combinations are reported in Table S32.

calc\_1d conf\_1

|   |               |               |               |
|---|---------------|---------------|---------------|
| C | -7.7998868851 | -0.9073248861 | 1.3262749071  |
| C | -7.6726863531 | 0.4229759537  | 1.7061205275  |
| C | -6.4127789054 | 1.0016176843  | 1.9229288898  |
| C | -5.2794391032 | 0.2357601728  | 1.7407686565  |
| C | -5.3794200913 | -1.109171306  | 1.3362482676  |
| C | -6.6573762969 | -1.6898083263 | 1.1513081671  |
| O | -6.812501915  | -2.9677180606 | 0.8125022376  |
| O | -8.7460771385 | 1.2227587777  | 1.8910335204  |
| C | -3.8964532542 | 0.7688724944  | 1.9885468804  |
| C | -2.9029960377 | 0.0924496384  | 1.061853545   |
| O | -2.9865352586 | -1.3433661457 | 1.2025930671  |
| C | -4.1895045575 | -1.9317680073 | 1.1487018077  |
| O | -4.2321562616 | -3.1438063333 | 0.9616009761  |
| C | -1.4578954543 | 0.4638403555  | 1.3355628968  |
| C | -0.4875610211 | -0.092107393  | 0.3043259693  |
| C | 0.9707618847  | 0.2047617254  | 0.6402826841  |
| C | 1.8797738735  | -0.273855046  | -0.4909911646 |
| C | 1.3975330665  | 0.2805642207  | -1.83073566   |
| C | -0.0867103095 | -0.0131008416 | -2.0329784102 |
| O | -0.8407363087 | 0.4936317909  | -0.9394701404 |
| C | -0.6553073549 | 0.6145267334  | -3.2894761093 |
| H | -8.7718071611 | -1.3656808767 | 1.17277511    |
| H | -6.3558173438 | 2.0395166625  | 2.2299419993  |
| H | -5.9032778829 | -3.3647752422 | 0.7967820183  |
| H | -9.551243994  | 0.7199119795  | 1.7107973709  |
| H | -3.8633466722 | 1.8514435715  | 1.8344918136  |
| H | -3.6063862316 | 0.5809991902  | 3.0314088198  |
| H | -3.1451255038 | 0.3306884454  | 0.0203860349  |
| H | -1.3745371902 | 1.5567801801  | 1.3373868437  |
| H | -1.1794104223 | 0.1063461797  | 2.3332359128  |
| H | -0.6234160868 | -1.1837731186 | 0.2369410764  |
| H | 1.0848762654  | 1.2876790254  | 0.7792671023  |
| H | 1.2403172282  | -0.2780455409 | 1.5865415165  |
| H | 2.9180114344  | 0.0187114717  | -0.3021591004 |
| H | 1.8638046485  | -1.3713934409 | -0.5260153792 |
| H | 1.5408209723  | 1.3684027553  | -1.8587068601 |
| H | 1.9753578408  | -0.1456169362 | -2.658759963  |
| H | -0.2259732037 | -1.107453093  | -2.0752275518 |
| H | -0.5380030233 | 1.7018254761  | -3.2571535587 |
| H | -1.7202053823 | 0.3868290375  | -3.3823709104 |
| H | -0.1396846099 | 0.2358710722  | -4.1765638105 |

calc\_1d conf\_2

|   |               |               |              |
|---|---------------|---------------|--------------|
| C | -7.131285893  | -0.5450466879 | 2.6435951439 |
| C | -7.4836031782 | 0.3966120257  | 1.6851355258 |
| C | -6.7468239365 | 0.5401749139  | 0.4989627546 |
| C | -5.6462000732 | -0.2648334117 | 0.2890131093 |
| C | -5.2550518343 | -1.2129931395 | 1.2534517715 |
| C | -6.0214632982 | -1.3659533846 | 2.4337450164 |
| O | -5.720249746  | -2.2706256121 | 3.3622291793 |

|   |               |               |               |
|---|---------------|---------------|---------------|
| O | -8.5487234677 | 1.2138599185  | 1.8384073247  |
| C | -4.8398776382 | -0.2242472125 | -0.9768892822 |
| C | -3.3809015077 | -0.5574678912 | -0.7031756257 |
| O | -3.2765790191 | -1.8135954551 | 0.0062825916  |
| C | -4.0787921945 | -2.0528574119 | 1.0527785851  |
| O | -3.7882915464 | -2.9846254849 | 1.7978323073  |
| C | -2.6247310418 | 0.5282310196  | 0.0546567163  |
| C | -1.1393046586 | 0.2309091158  | 0.190748399   |
| C | -0.3961616123 | 1.2751509634  | 1.0184533703  |
| C | 1.103003748   | 0.9794528997  | 1.0157835642  |
| C | 1.6083546968  | 0.8109548284  | -0.4161676765 |
| C | 0.7539549211  | -0.2020432786 | -1.1737213558 |
| O | -0.6153614084 | 0.1779351361  | -1.1277661654 |
| C | 1.1279174125  | -0.3255106578 | -2.6369395468 |
| H | -7.7052721713 | -0.6715710892 | 3.5561985229  |
| H | -7.0621231338 | 1.2765258547  | -0.2311997278 |
| H | -4.943891353  | -2.7807776647 | 3.0118673983  |
| H | -8.9765388489 | 1.022464386   | 2.6834005787  |
| H | -5.2443991611 | -0.9610158359 | -1.6827550894 |
| H | -4.911923119  | 0.7536395425  | -1.4615629003 |
| H | -2.8564946523 | -0.7505414736 | -1.6396829169 |
| H | -2.7390474429 | 1.4720234237  | -0.4915303592 |
| H | -3.0651514598 | 0.6718790003  | 1.0474669512  |
| H | -1.0108896116 | -0.7563768723 | 0.6644057314  |
| H | -0.5829519514 | 2.2652305289  | 0.5829957502  |
| H | -0.788489028  | 1.2872631966  | 2.0417085452  |
| H | 1.6542313756  | 1.7739381439  | 1.5297279872  |
| H | 1.2887374018  | 0.0541010873  | 1.5773876892  |
| H | 1.5570642489  | 1.7707176834  | -0.9462295063 |
| H | 2.6562628497  | 0.4901104707  | -0.4237693887 |
| H | 0.8589231197  | -1.1861273602 | -0.6846549476 |
| H | 2.1663116298  | -0.6520082362 | -2.7432420261 |
| H | 1.0138250788  | 0.6390800296  | -3.1404899454 |
| H | 0.4819875042  | -1.052036009  | -3.1364580537 |

calc\_1d conf\_3

|   |               |               |               |
|---|---------------|---------------|---------------|
| C | -7.7089809947 | -0.5688712357 | 1.3053582625  |
| C | -7.2318512235 | 0.6436330171  | 0.8226026828  |
| C | -5.8558275598 | 0.9060908044  | 0.7421672526  |
| C | -4.9602131496 | -0.0662248913 | 1.1389332563  |
| C | -5.4176715325 | -1.3112897919 | 1.6115830098  |
| C | -6.8084850436 | -1.5520913569 | 1.7181444401  |
| O | -7.2951129679 | -2.6934506952 | 2.2012284337  |
| O | -8.0617124631 | 1.6289977992  | 0.4132565825  |
| C | -3.4742716932 | 0.1476879155  | 1.1234305621  |
| C | -2.7645630537 | -1.163357819  | 0.8435467285  |
| O | -3.1719610956 | -2.1639283933 | 1.8052778201  |
| C | -4.4805297704 | -2.3437709394 | 2.0387771774  |
| O | -4.8270601331 | -3.3709377197 | 2.614166636   |
| C | -1.2457258799 | -1.1135381809 | 0.9280543147  |
| C | -0.5546265584 | -0.5726589582 | -0.3142475884 |
| C | 0.9650315135  | -0.6910417621 | -0.2240851549 |
| C | 1.624939111   | -0.05543794   | -1.4453480704 |
| C | 1.1024999345  | 1.3645642046  | -1.6487148119 |
| C | -0.4233203566 | 1.377700012   | -1.6698467477 |
| O | -0.9410590163 | 0.7827296035  | -0.4847455053 |
| C | -1.0075957812 | 2.7731036873  | -1.7549004182 |
| H | -8.7724090903 | -0.7712313411 | 1.3860951054  |

|   |               |               |               |
|---|---------------|---------------|---------------|
| H | -5.5230230704 | 1.8690699648  | 0.3726100803  |
| H | -6.5124028726 | -3.2279636938 | 2.4945659633  |
| H | -8.9765587403 | 1.3351195373  | 0.5145667905  |
| H | -3.1734322917 | 0.8839861899  | 0.3766582292  |
| H | -3.1438344205 | 0.5263322722  | 2.1002544518  |
| H | -3.0657481009 | -1.5334070711 | -0.1461393517 |
| H | -0.9401993284 | -0.5257707635 | 1.8010711066  |
| H | -0.8958960913 | -2.1382039331 | 1.0911604583  |
| H | -0.8972540265 | -1.1489166817 | -1.1937060524 |
| H | 1.2992202513  | -0.1821854191 | 0.688790498   |
| H | 1.2479127807  | -1.7455987558 | -0.1327017206 |
| H | 2.7145512125  | -0.0555189235 | -1.3377493123 |
| H | 1.397888411   | -0.6575418895 | -2.3355342571 |
| H | 1.4419012852  | 2.0098890464  | -0.8285173048 |
| H | 1.4877155563  | 1.7923854052  | -2.5811551786 |
| H | -0.7666136778 | 0.7833554455  | -2.5351590174 |
| H | -2.0999253026 | 2.7341022586  | -1.7727153504 |
| H | -0.6651224625 | 3.2782836978  | -2.6623588745 |
| H | -0.6986723074 | 3.3669072942  | -0.889675126  |

calc\_ld conf\_4

|   |               |               |               |
|---|---------------|---------------|---------------|
| C | -6.9328357728 | 0.1651356259  | 2.1516654372  |
| C | -6.6636609256 | 0.9060147722  | 1.0074830418  |
| C | -5.6875976527 | 0.4966399173  | 0.0862309955  |
| C | -4.9764758548 | -0.6610530978 | 0.3284701125  |
| C | -5.2150593986 | -1.4182431776 | 1.4909499735  |
| C | -6.2194953561 | -1.0087505534 | 2.4001214765  |
| O | -6.5117583432 | -1.7066837817 | 3.4958077659  |
| O | -7.3262878075 | 2.0490445413  | 0.7210742753  |
| C | -3.9603308344 | -1.2008862717 | -0.6359079798 |
| C | -2.8545587998 | -1.9391111595 | 0.1021136741  |
| O | -3.4135681262 | -2.9419953796 | 0.9822477412  |
| C | -4.4559135361 | -2.6325339339 | 1.7666042591  |
| O | -4.7300167682 | -3.4007039488 | 2.6841907526  |
| C | -1.9027102853 | -1.050554336  | 0.9041319708  |
| C | -0.7973795758 | -0.3990835742 | 0.084948902   |
| C | 0.2100544589  | 0.3362788026  | 0.9659066599  |
| C | 1.2514939355  | 1.0501800579  | 0.1076892913  |
| C | 0.563218677   | 1.9193726324  | -0.9424713683 |
| C | -0.4592859739 | 1.1036166386  | -1.7283624661 |
| O | -1.3930438938 | 0.493370436   | -0.8444544964 |
| C | -1.2602084668 | 1.9356993066  | -2.7094238392 |
| H | -7.6964747155 | 0.4688883251  | 2.8609154735  |
| H | -5.5122981992 | 1.0963681905  | -0.7991762269 |
| H | -5.9439519388 | -2.520160947  | 3.4666240807  |
| H | -7.9675282783 | 2.2269127637  | 1.4216312051  |
| H | -4.4551259647 | -1.8991864105 | -1.3233864224 |
| H | -3.5126291748 | -0.4027863276 | -1.2301531899 |
| H | -2.2720231821 | -2.531520141  | -0.608453705  |
| H | -2.4633882689 | -0.2741538087 | 1.4364371343  |
| H | -1.4263926605 | -1.6845614102 | 1.6592823704  |
| H | -0.2589072514 | -1.1840207245 | -0.4785101352 |
| H | -0.3335807518 | 1.0660305391  | 1.5788772758  |
| H | 0.6887313949  | -0.3733226432 | 1.6498595599  |
| H | 1.9183392481  | 1.6530273288  | 0.7327409359  |
| H | 1.8817599353  | 0.3036477154  | -0.3944149988 |
| H | 0.0403604249  | 2.7520776337  | -0.4551961266 |
| H | 1.2963973776  | 2.3531720892  | -1.6318001514 |

|   |               |              |               |
|---|---------------|--------------|---------------|
| H | 0.0746051696  | 0.3055713817 | -2.2743481989 |
| H | -1.8164651403 | 2.7143426362 | -2.1793796205 |
| H | -1.9749962521 | 1.3114316592 | -3.2520960415 |
| H | -0.599011472  | 2.4154886334 | -3.4364693977 |

calc\_1d conf\_5

|   |               |               |               |
|---|---------------|---------------|---------------|
| C | -7.8935127021 | -1.4309898852 | 1.603007208   |
| C | -8.0165800565 | -0.0535878202 | 1.4687541501  |
| C | -6.888056073  | 0.7687861597  | 1.3260324942  |
| C | -5.6340857771 | 0.193899135   | 1.3067662078  |
| C | -5.4825478488 | -1.2015102048 | 1.4207823191  |
| C | -6.62693863   | -2.0171760074 | 1.5940990244  |
| O | -6.5398925322 | -3.3361359906 | 1.7493634611  |
| O | -9.2177043861 | 0.5641202374  | 1.4733426089  |
| C | -4.3755028438 | 1.0066147909  | 1.1954880526  |
| C | -3.3032319851 | 0.215449977   | 0.465172534   |
| O | -3.0978866304 | -1.0554713265 | 1.1162746548  |
| C | -4.163053762  | -1.8196715998 | 1.4064139712  |
| O | -3.9682885233 | -3.0035822369 | 1.6611170006  |
| C | -1.9672553604 | 0.9308230451  | 0.4100796456  |
| C | -0.8965932452 | 0.2732412411  | -0.4585754673 |
| C | -0.1503399622 | -0.8804691444 | 0.2062832056  |
| C | 0.9833094719  | -1.3688345547 | -0.6930395694 |
| C | 1.8674082068  | -0.1984377131 | -1.1159281017 |
| C | 1.0186715264  | 0.9211471924  | -1.7103058194 |
| O | 0.0029518021  | 1.3184004917  | -0.799732143  |
| C | 1.8162469838  | 2.1655224598  | -2.0456322502 |
| H | -8.7610520123 | -2.0709571647 | 1.7295258106  |
| H | -7.0256014645 | 1.8400683323  | 1.2356846494  |
| H | -5.5725483043 | -3.552877914  | 1.7750068045  |
| H | -9.9151883454 | -0.0967605975 | 1.5758932798  |
| H | -4.5634702006 | 1.9457017792  | 0.6672647323  |
| H | -4.0088103108 | 1.2664686432  | 2.1975733318  |
| H | -3.6514503336 | -0.0000896339 | -0.5543556835 |
| H | -2.146054665  | 1.9266838907  | -0.0100582193 |
| H | -1.5879346487 | 1.0751095589  | 1.4280674723  |
| H | -1.3687391311 | -0.0984726096 | -1.3874866321 |
| H | 0.2606901435  | -0.5162442968 | 1.1566763035  |
| H | -0.8463890211 | -1.688644153  | 0.4430464514  |
| H | 1.5731709572  | -2.1364314747 | -0.1813271684 |
| H | 0.5588929284  | -1.8459012292 | -1.5871614906 |
| H | 2.4038059099  | 0.1988706318  | -0.2446971331 |
| H | 2.6206125319  | -0.5175321812 | -1.8455508333 |
| H | 0.5336770399  | 0.5399220124  | -2.6273657974 |
| H | 2.2912657762  | 2.5643647667  | -1.1444954393 |
| H | 1.1637611732  | 2.9387243953  | -2.4591805719 |
| H | 2.5962443046  | 1.9378589976  | -2.7778230534 |

calc\_1d conf\_6

|   |               |               |              |
|---|---------------|---------------|--------------|
| C | -7.3935786474 | -0.3422831099 | 1.979666225  |
| C | -7.3291068686 | 0.4461239843  | 0.83721131   |
| C | -6.1741489363 | 0.4839110282  | 0.0415487618 |
| C | -5.0862437201 | -0.2892030512 | 0.3936236134 |
| C | -5.133904723  | -1.113499875  | 1.5350476712 |
| C | -6.2934086821 | -1.117721236  | 2.3479478509 |
| O | -6.3752904319 | -1.8420836544 | 3.4621023045 |
| O | -8.3652886836 | 1.2165884308  | 0.4382913859 |

|   |               |               |               |
|---|---------------|---------------|---------------|
| C | -3.7991851017 | -0.2708508037 | -0.3800134615 |
| C | -3.1384577866 | -1.6357016555 | -0.298382001  |
| O | -2.9518332025 | -2.0278550469 | 1.0801201872  |
| C | -3.9905482248 | -1.9300688752 | 1.9241951406  |
| O | -3.9207178464 | -2.5275470897 | 2.9938895262  |
| C | -1.796972666  | -1.791475189  | -1.001310729  |
| C | -0.6637195456 | -0.8141400758 | -0.6980314902 |
| C | -0.2355644745 | -0.699262893  | 0.7624240946  |
| C | 0.912158901   | 0.3021977414  | 0.8823173068  |
| C | 0.5266986249  | 1.6269017311  | 0.2262074265  |
| C | 0.031498739   | 1.4000137517  | -1.1997246346 |
| O | -1.0324958329 | 0.456159582   | -1.2178718736 |
| C | -0.4843544447 | 2.6602795143  | -1.8643282535 |
| H | -8.2778772926 | -0.3630136103 | 2.6088683812  |
| H | -6.1584128189 | 1.1220299837  | -0.8343934754 |
| H | -5.4872095898 | -2.2667702902 | 3.5849706375  |
| H | -9.098704504  | 1.1067519495  | 1.0576832134  |
| H | -3.97085376   | -0.0116924637 | -1.4282506672 |
| H | -3.1211721765 | 0.4912505476  | 0.0165367928  |
| H | -3.8230705511 | -2.3747499195 | -0.7366037091 |
| H | -1.4389481795 | -2.8056978897 | -0.7932204312 |
| H | -1.9895604423 | -1.7383006704 | -2.0787732366 |
| H | 0.2101386959  | -1.1739235721 | -1.2720565681 |
| H | -1.0837613882 | -0.3687118368 | 1.3691144184  |
| H | 0.0574755517  | -1.6838655579 | 1.1414012541  |
| H | 1.1808935915  | 0.4558166579  | 1.9325098918  |
| H | 1.8045836569  | -0.1031113281 | 0.3857045047  |
| H | -0.2760815778 | 2.1073379289  | 0.8004796276  |
| H | 1.3759724284  | 2.3196772742  | 0.2141900489  |
| H | 0.8651232265  | 0.9878733638  | -1.7962827952 |
| H | 0.3077239484  | 3.4114273742  | -1.9314493194 |
| H | -1.3135547522 | 3.0829459118  | -1.2891684538 |
| H | -0.8432405126 | 2.4412429386  | -2.8731904759 |

calc\_1d conf\_7

|   |               |               |               |
|---|---------------|---------------|---------------|
| C | -7.8797032857 | -1.1376980819 | 1.2951402811  |
| C | -7.6489825732 | -0.0125146718 | 0.5136229965  |
| C | -6.3548057767 | 0.5026932006  | 0.3422639827  |
| C | -5.2919298512 | -0.1303423889 | 0.9536565493  |
| C | -5.4953980865 | -1.2841653879 | 1.7334934794  |
| C | -6.8093734428 | -1.7762809567 | 1.9236549642  |
| O | -7.0652755735 | -2.8363900837 | 2.6861711377  |
| O | -8.6496091494 | 0.6438962319  | -0.1135198264 |
| C | -3.882892134  | 0.3815681887  | 0.8532823268  |
| C | -2.899057611  | -0.7740461171 | 0.9163840691  |
| O | -3.1306043279 | -1.5648853787 | 2.1015056876  |
| C | -4.3803880814 | -1.957799285  | 2.3890103726  |
| O | -4.5271851564 | -2.8608104031 | 3.2060020828  |
| C | -1.4381387958 | -0.3655154577 | 0.9948840663  |
| C | -0.9003311422 | 0.386945149   | -0.2168821543 |
| C | -0.9445267235 | -0.4079969401 | -1.520796511  |
| C | -0.2393342159 | 0.3594968019  | -2.638578238  |
| C | 1.1558464215  | 0.7889033015  | -2.1907985973 |
| C | 1.0839876903  | 1.5254868849  | -0.8564756777 |
| O | 0.4348504101  | 0.7211085952  | 0.1182845234  |
| C | 2.4448991749  | 1.8821607168  | -0.2937173681 |
| H | -8.8799882444 | -1.5317823527 | 1.4450825828  |
| H | -6.2176168688 | 1.3902928703  | -0.2645323538 |

|   |               |               |               |
|---|---------------|---------------|---------------|
| H | -6.1994553924 | -3.1076150454 | 3.0879057844  |
| H | -9.4875692332 | 0.2021415849  | 0.0771500347  |
| H | -3.7437787066 | 0.9412764327  | -0.0760625504 |
| H | -3.6751823723 | 1.0737477167  | 1.6805176306  |
| H | -3.0688517292 | -1.4357673305 | 0.0576702807  |
| H | -1.2919087814 | 0.2584675873  | 1.8828223076  |
| H | -0.8345490688 | -1.2673406849 | 1.1396440601  |
| H | -1.4679220596 | 1.3244228678  | -0.3606789195 |
| H | -0.4473018277 | -1.3722187592 | -1.3553046693 |
| H | -1.9818534894 | -0.6205592599 | -1.8045687242 |
| H | -0.1862838894 | -0.2491759117 | -3.5471996779 |
| H | -0.8285705094 | 1.2511872486  | -2.8925837621 |
| H | 1.7967642383  | -0.092785177  | -2.0645629224 |
| H | 1.6266881099  | 1.4302388406  | -2.944451378  |
| H | 0.4930285478  | 2.4485203584  | -0.9976460826 |
| H | 3.0388529777  | 0.9770498713  | -0.1368498507 |
| H | 2.3392907542  | 2.3923101741  | 0.6668902544  |
| H | 2.9861597748  | 2.5387750508  | -0.9808301912 |

calc\_ld conf\_8

|   |               |               |               |
|---|---------------|---------------|---------------|
| C | -6.9813488606 | -0.1744873646 | 2.4480072324  |
| C | -7.4584101115 | 0.1947107702  | 1.1967899422  |
| C | -6.7865647034 | -0.1769884144 | 0.0212591967  |
| C | -5.6245070906 | -0.9138120731 | 0.1155332321  |
| C | -5.1088465035 | -1.2850432223 | 1.3721438836  |
| C | -5.8087741402 | -0.9256280463 | 2.548848333   |
| O | -5.3869308493 | -1.2783946105 | 3.7606778694  |
| O | -8.5874717094 | 0.9199619063  | 1.0433991318  |
| C | -4.8749725004 | -1.4044813786 | -1.0896336519 |
| C | -3.3793261138 | -1.474039102  | -0.807606156  |
| O | -3.1364408114 | -2.2605233404 | 0.3795782927  |
| C | -3.8677337644 | -2.0407400088 | 1.4833681084  |
| O | -3.4525551193 | -2.4997290512 | 2.5433704335  |
| C | -2.7114900362 | -0.1080672984 | -0.7136994892 |
| C | -1.1911376158 | -0.131889036  | -0.5656622275 |
| C | -0.6879541644 | -0.3626171472 | 0.8567374232  |
| C | 0.8323250258  | -0.2248185675 | 0.91368975    |
| C | 1.2705009978  | 1.0974063425  | 0.2894596015  |
| C | 0.6647445299  | 1.255745402   | -1.1019278036 |
| O | -0.7491132738 | 1.1275830638  | -1.0516264077 |
| C | 0.9585532111  | 2.601719953   | -1.7336990187 |
| H | -7.5033804089 | 0.0979248393  | 3.3598542062  |
| H | -7.1973179157 | 0.1205492757  | -0.9365534265 |
| H | -4.5785741412 | -1.8370219047 | 3.6243608492  |
| H | -8.9583746379 | 1.1188764626  | 1.913245137   |
| H | -5.2308448397 | -2.4100255377 | -1.347861357  |
| H | -5.0604045469 | -0.7661224683 | -1.9579143148 |
| H | -2.8896998751 | -2.0554615582 | -1.593473288  |
| H | -2.9275863749 | 0.4237710571  | -1.6470644627 |
| H | -3.1576154761 | 0.4816179606  | 0.0947530174  |
| H | -0.7787222767 | -0.9236711695 | -1.2193551803 |
| H | -1.1518432871 | 0.3896888553  | 1.507983308   |
| H | -1.0052033934 | -1.3454587264 | 1.2144190266  |
| H | 1.1839116791  | -0.3020295457 | 1.947782391   |
| H | 1.2933708284  | -1.0571181211 | 0.3643271324  |
| H | 0.931519021   | 1.9354981653  | 0.9118831718  |
| H | 2.3630468138  | 1.1593582173  | 0.2257531072  |
| H | 1.0641272812  | 0.4536500208  | -1.7490639667 |

|   |              |              |               |
|---|--------------|--------------|---------------|
| H | 2.0369251934 | 2.7508670631 | -1.8395949309 |
| H | 0.5555299221 | 3.4066662388 | -1.1120926399 |
| H | 0.4975900381 | 2.6695720991 | -2.7223954559 |

calc\_1d conf\_9

|   |               |               |               |
|---|---------------|---------------|---------------|
| C | -7.5031310275 | -0.2865922142 | 1.3610731373  |
| C | -6.9015284313 | 0.9291606125  | 1.0600523491  |
| C | -5.5055122021 | 1.0590913652  | 1.0129343019  |
| C | -4.7167484419 | -0.0469120168 | 1.2582419698  |
| C | -5.301044539  | -1.2942982874 | 1.5444355248  |
| C | -6.7105741984 | -1.405958079  | 1.619509792   |
| O | -7.314521317  | -2.5507986155 | 1.9303149698  |
| O | -7.6232550119 | 2.0430674892  | 0.8038950087  |
| C | -3.2153717054 | 0.0251517732  | 1.2656542654  |
| C | -2.6243431683 | -1.2989375952 | 0.8211438172  |
| O | -3.1552834382 | -2.3842917387 | 1.6180333202  |
| C | -4.4775763945 | -2.4675034574 | 1.8130638663  |
| O | -4.934969803  | -3.5285973368 | 2.2271417902  |
| C | -1.1137870178 | -1.4483604429 | 0.9499550156  |
| C | -0.2734384724 | -0.484204639  | 0.104751589   |
| C | 0.1059098591  | 0.8233147548  | 0.7999978304  |
| C | 0.894207977   | 1.7159764837  | -0.1572477093 |
| C | 0.14109522    | 1.8779803407  | -1.4763100076 |
| C | -0.2369113231 | 0.5159988786  | -2.0515448684 |
| O | -0.9807083524 | -0.2351584266 | -1.0996671491 |
| C | -1.0880651469 | 0.6060776062  | -3.3016565388 |
| H | -8.5823552669 | -0.390454939  | 1.4149461126  |
| H | -5.0738946736 | 2.0269236125  | 0.7854154108  |
| H | -6.5920907105 | -3.1998792186 | 2.1351628694  |
| H | -8.5641164241 | 1.8305151975  | 0.8604887869  |
| H | -2.8686013969 | 0.8086621043  | 0.5888097379  |
| H | -2.8599634823 | 0.2710087367  | 2.2756025232  |
| H | -2.916127628  | -1.4840109019 | -0.2171297531 |
| H | -0.8333599759 | -1.3488735605 | 2.0046151043  |
| H | -0.8850620731 | -2.4786744435 | 0.6620799531  |
| H | 0.670841418   | -0.9975721276 | -0.1479126104 |
| H | -0.7969597737 | 1.3446532681  | 1.1359401789  |
| H | 0.6978941023  | 0.5971210204  | 1.6942719801  |
| H | 1.0920593635  | 2.6915375096  | 0.2988514612  |
| H | 1.8730891983  | 1.2579225945  | -0.3540666144 |
| H | -0.7798021896 | 2.4535164331  | -1.3158689382 |
| H | 0.7458542235  | 2.4306958811  | -2.2040654997 |
| H | 0.6910472714  | -0.0381581467 | -2.2778677653 |
| H | -0.5523488697 | 1.1347331816  | -4.0950549781 |
| H | -2.0163740016 | 1.1452823569  | -3.0909715452 |
| H | -1.346172176  | -0.393155013  | -3.6610186889 |

calc\_1d conf\_10

|   |               |               |              |
|---|---------------|---------------|--------------|
| C | -7.619897697  | -0.5435134271 | 1.1217729405 |
| C | -7.1991975618 | 0.7798600531  | 1.1656773096 |
| C | -5.8522585834 | 1.1102146986  | 1.3810079039 |
| C | -4.9281944046 | 0.0971116698  | 1.5370063455 |
| C | -5.324676244  | -1.2515057757 | 1.4748943417 |
| C | -6.6907912575 | -1.5716410085 | 1.2907467974 |
| O | -7.1266630226 | -2.8291357778 | 1.2721055432 |
| O | -8.0583714491 | 1.8117070603  | 1.0105488905 |
| C | -3.4739518498 | 0.3590020465  | 1.8100348369 |



|   |               |               |               |
|---|---------------|---------------|---------------|
| C | -2.6224410062 | -0.7301916792 | 1.1800757972  |
| O | -3.0516582898 | -2.0185878564 | 1.6831613858  |
| C | -4.3549236262 | -2.3276775431 | 1.6474497901  |
| O | -4.6752163289 | -3.5048917345 | 1.7790757483  |
| C | -1.1292482542 | -0.6510800186 | 1.4812669982  |
| C | -0.2907980716 | 0.0904768852  | 0.4436364798  |
| C | -0.5816804758 | 1.580146419   | 0.2738568701  |
| C | 0.3223154877  | 2.1619777703  | -0.8122019101 |
| C | 0.1897363517  | 1.3433707415  | -2.0950101119 |
| C | 0.4073492936  | -0.1414725043 | -1.8152021932 |
| O | -0.4661019776 | -0.5900105247 | -0.7867099992 |
| C | 0.1539968696  | -1.0224061208 | -3.021441648  |
| H | -8.6629847793 | -0.8048169399 | 0.9731443437  |
| H | -5.5663402606 | 2.1549326557  | 1.4220323984  |
| H | -6.3393774616 | -3.3997978685 | 1.4707732614  |
| H | -8.948520633  | 1.4639112392  | 0.8680805995  |
| H | -3.1793648406 | 1.3413605899  | 1.4338932719  |
| H | -3.2945669457 | 0.3631496184  | 2.8940139074  |
| H | -2.7716133051 | -0.7455962452 | 0.0948640517  |
| H | -0.9607009881 | -0.2117054853 | 2.471300362   |
| H | -0.7602514101 | -1.6798306691 | 1.5170617343  |
| H | 0.7646794282  | -0.0086503401 | 0.7545160603  |
| H | -1.6284871171 | 1.713875019   | -0.0241544413 |
| H | -0.4390197057 | 2.101948775   | 1.2273347243  |
| H | 0.0781769744  | 3.2133134663  | -0.9968238952 |
| H | 1.3650901314  | 2.1367989809  | -0.4678267356 |
| H | -0.8152986032 | 1.4727291001  | -2.5167963335 |
| H | 0.9058228079  | 1.6843656825  | -2.8511671357 |
| H | 1.4471748927  | -0.2834958648 | -1.4706259234 |
| H | 0.8321735414  | -0.7613591967 | -3.8388287023 |
| H | -0.8752159392 | -0.9003533501 | -3.3714441051 |
| H | 0.3052963107  | -2.0735325413 | -2.764099559  |

calc\_1d conf\_11

|   |               |               |               |
|---|---------------|---------------|---------------|
| C | -7.5241640742 | -0.4241226331 | 1.836660622   |
| C | -7.5563984077 | 0.0257246895  | 0.5226419574  |
| C | -6.4088905167 | 0.0010886399  | -0.2845281911 |
| C | -5.2306340155 | -0.4944232372 | 0.2362872699  |
| C | -5.1757776224 | -0.9764572695 | 1.5572892605  |
| C | -6.3320340585 | -0.9158037053 | 2.3716097728  |
| O | -6.3251823937 | -1.3153540419 | 3.6411568978  |
| O | -8.6840868019 | 0.5127967267  | -0.0419145576 |
| C | -3.945368749  | -0.5141726405 | -0.5406044926 |
| C | -3.1100378507 | -1.7104395148 | -0.1197991056 |
| O | -2.8903627418 | -1.6973321668 | 1.3050928564  |
| C | -3.9349395456 | -1.5037130092 | 2.1180163287  |
| O | -3.8013301112 | -1.775060831  | 3.3079135353  |
| C | -1.7434207772 | -1.829724036  | -0.7866038664 |
| C | -0.9647297983 | -0.5396507035 | -1.0111901007 |
| C | 0.4232593348  | -0.8098446311 | -1.5898966141 |
| C | 1.214166013   | 0.490997176   | -1.711187942  |
| C | 1.1999699806  | 1.2401194856  | -0.3803107233 |
| C | -0.2295022651 | 1.4080487894  | 0.126216563   |
| O | -0.874958991  | 0.1443538513  | 0.222746621   |
| C | -0.3091720142 | 2.045046536   | 1.4986251717  |
| H | -8.4041460851 | -0.3920335652 | 2.4714845458  |
| H | -6.4711449063 | 0.3741049433  | -1.3003259405 |
| H | -5.3871878692 | -1.568755753  | 3.8470712771  |

|   |               |               |               |
|---|---------------|---------------|---------------|
| H | -9.4014528146 | 0.4791435942  | 0.6044804931  |
| H | -4.1382080977 | -0.5536487877 | -1.6171721997 |
| H | -3.3779966991 | 0.4007760661  | -0.3352156271 |
| H | -3.6764038955 | -2.6266287472 | -0.3342319108 |
| H | -1.1445285046 | -2.5154523934 | -0.1781562162 |
| H | -1.8825669485 | -2.3079327648 | -1.7631505162 |
| H | -1.5153998678 | 0.0971358095  | -1.7289215131 |
| H | 0.9474202065  | -1.5023320741 | -0.9193877044 |
| H | 0.3313162451  | -1.3041314533 | -2.5639807672 |
| H | 2.2413251601  | 0.2883670637  | -2.0320790934 |
| H | 0.7613335064  | 1.1216957888  | -2.4883762473 |
| H | 1.7681700192  | 0.6785508448  | 0.3718895465  |
| H | 1.6741354963  | 2.222971677   | -0.4809898715 |
| H | -0.7855179243 | 2.0285903772  | -0.6002147647 |
| H | 0.2209266515  | 1.4303967064  | 2.2315149249  |
| H | -1.3498181688 | 2.1339837134  | 1.8200168686  |
| H | 0.1403399026  | 3.0421214797  | 1.4875234532  |

calc\_ld conf\_12

|   |               |               |               |
|---|---------------|---------------|---------------|
| C | -7.1946979261 | 0.0472167203  | 1.5974549378  |
| C | -6.9963524361 | 0.2802058763  | 0.2426717328  |
| C | -5.923471008  | -0.3053323488 | -0.4481107606 |
| C | -5.0451599686 | -1.1170410554 | 0.2391960617  |
| C | -5.2101612508 | -1.3517472732 | 1.6170852948  |
| C | -6.3115901329 | -0.7788036768 | 2.2961058855  |
| O | -6.539423697  | -0.997543306  | 3.5887386346  |
| O | -7.8214679678 | 1.0698294512  | -0.479395122  |
| C | -3.9082013715 | -1.8343487035 | -0.42859218   |
| C | -2.725447107  | -1.9684838038 | 0.5213609202  |
| O | -3.1473089839 | -2.6010442234 | 1.7498557626  |
| C | -4.2698320698 | -2.1864663575 | 2.3574289624  |
| O | -4.4598489289 | -2.5424611899 | 3.5158285083  |
| C | -2.0135493137 | -0.6645490411 | 0.8678493888  |
| C | -1.3133890047 | 0.0326367483  | -0.293924537  |
| C | -0.2109813192 | -0.7941695025 | -0.9533691468 |
| C | 0.5389900213  | 0.0430110349  | -1.9887557767 |
| C | 1.0026477002  | 1.3606486576  | -1.3726981234 |
| C | -0.166199167  | 2.0744607218  | -0.6997654821 |
| O | -0.7798941503 | 1.223277961   | 0.2580353719  |
| C | 0.2433157841  | 3.3348706985  | 0.0349848707  |
| H | -8.030526264  | 0.484682583   | 2.1344107266  |
| H | -5.8118233666 | -0.1119905758 | -1.5087105405 |
| H | -5.8441149192 | -1.6379541867 | 3.8904312957  |
| H | -8.5161755266 | 1.4143666678  | 0.0971199825  |
| H | -4.2378362694 | -2.8401494677 | -0.7190569257 |
| H | -3.6029240514 | -1.3251054681 | -1.3467976691 |
| H | -2.0091620136 | -2.6830202225 | 0.1104155524  |
| H | -2.7265685437 | 0.0419736124  | 1.3047687337  |
| H | -1.2670079401 | -0.8822299552 | 1.6386098571  |
| H | -2.054312574  | 0.3078551737  | -1.0665930844 |
| H | 0.4816598126  | -1.1331344244 | -0.1723777788 |
| H | -0.6329114206 | -1.6887814112 | -1.4262280984 |
| H | 1.3883676755  | -0.5179853323 | -2.3923206713 |
| H | -0.1279439122 | 0.2538358766  | -2.8359918788 |
| H | 1.7728484551  | 1.1693828069  | -0.6147777763 |
| H | 1.4476048727  | 2.0117679959  | -2.1336407931 |
| H | -0.9137648215 | 2.3280331628  | -1.4728652679 |
| H | -0.6241926101 | 3.7967898146  | 0.5126508945  |

|   |              |              |               |
|---|--------------|--------------|---------------|
| H | 0.6883235336 | 4.056734218  | -0.6557579874 |
| H | 0.976482181  | 3.0987617441 | 0.8117262255  |

calc\_1d conf\_13

|   |               |               |               |
|---|---------------|---------------|---------------|
| C | -6.7474625594 | 0.2386425027  | 1.9354200056  |
| C | -7.343511065  | -0.2086617281 | 0.7634025104  |
| C | -6.6466223182 | -1.0216501281 | -0.1438443905 |
| C | -5.3404200142 | -1.3719980648 | 0.1320207675  |
| C | -4.7062356773 | -0.9146701217 | 1.3023160099  |
| C | -5.4283866739 | -0.1190237011 | 2.2223106464  |
| O | -4.8918374931 | 0.3060067482  | 3.3638660538  |
| O | -8.6173788679 | 0.1067435855  | 0.4385117744  |
| C | -4.5412134818 | -2.2810034831 | -0.7592550667 |
| C | -3.0646379266 | -1.9106149968 | -0.7038135044 |
| O | -2.6082394177 | -1.91036136   | 0.6628874285  |
| C | -3.3223781218 | -1.2716883903 | 1.5995816592  |
| O | -2.7911490213 | -1.0520691213 | 2.6828068331  |
| C | -2.7709342418 | -0.5895581911 | -1.4179085058 |
| C | -1.4056168015 | 0.0447653202  | -1.1634324595 |
| C | -0.220146769  | -0.9165799899 | -1.219770626  |
| C | 1.069157665   | -0.1790097521 | -0.8630487002 |
| C | 0.9000426434  | 0.5402409173  | 0.4733790441  |
| C | -0.3356298431 | 1.4352245762  | 0.4468971836  |
| O | -1.4909519085 | 0.6885647374  | 0.0939814585  |
| C | -0.6345799821 | 2.0817991253  | 1.7844742087  |
| H | -7.284989979  | 0.8553317975  | 2.6489193084  |
| H | -7.1508997975 | -1.3611565057 | -1.0412446853 |
| H | -3.9851267582 | -0.0948534262 | 3.4104544575  |
| H | -8.9917246829 | 0.6664981657  | 1.1314170751  |
| H | -4.6620858598 | -3.3184934727 | -0.4227903113 |
| H | -4.900000726  | -2.234311149  | -1.7918151091 |
| H | -2.4698464626 | -2.7063271201 | -1.1579803351 |
| H | -2.8796739962 | -0.7833344689 | -2.4919030279 |
| H | -3.5257835291 | 0.1572347447  | -1.1511846832 |
| H | -1.2531961651 | 0.817757409   | -1.9391934114 |
| H | -0.3833712815 | -1.7251430485 | -0.4999542008 |
| H | -0.1525197892 | -1.3623496097 | -2.2197993309 |
| H | 1.9126393968  | -0.8763597685 | -0.8251222053 |
| H | 1.3016188536  | 0.5551262267  | -1.6469553736 |
| H | 0.7776609446  | -0.193860404  | 1.27918884    |
| H | 1.7848492522  | 1.143260304   | 0.7072760648  |
| H | -0.1814695898 | 2.2185555932  | -0.3181087682 |
| H | 0.2121124669  | 2.688466199   | 2.1185346248  |
| H | -0.8359275488 | 1.3101450405  | 2.5324933211  |
| H | -1.5161328725 | 2.7237150086  | 1.70998542    |

calc\_1d conf\_14

|   |               |               |               |
|---|---------------|---------------|---------------|
| C | -6.17695401   | 0.8831143423  | 0.9265396282  |
| C | -6.4212820798 | 0.3134830065  | -0.3173614868 |
| C | -5.773691895  | -0.8641825244 | -0.7165433163 |
| C | -4.8663114098 | -1.4571935785 | 0.1411027723  |
| C | -4.5838912249 | -0.8900452939 | 1.3938938521  |
| C | -5.2687232073 | 0.2799394088  | 1.7986170904  |
| O | -5.0729471566 | 0.835758136   | 2.9936319402  |
| O | -7.2941534741 | 0.8553424849  | -1.1968789767 |
| C | -4.1999813642 | -2.7642492959 | -0.1769579337 |
| C | -2.8337776511 | -2.905853387  | 0.4886978002  |

|   |               |               |               |
|---|---------------|---------------|---------------|
| O | -2.8792582239 | -2.5335194557 | 1.878739779   |
| C | -3.6080950067 | -1.4938422694 | 2.2969600611  |
| O | -3.4489156335 | -1.1112504726 | 3.4521979518  |
| C | -1.6670219043 | -2.2325491108 | -0.2353800271 |
| C | -1.7354112853 | -0.7379182386 | -0.5210039558 |
| C | -0.6546584941 | -0.3033012571 | -1.5109853142 |
| C | -0.6613740878 | 1.2152469417  | -1.673221972  |
| C | -0.5885515589 | 1.8907408189  | -0.3064406428 |
| C | -1.6689581425 | 1.3476456288  | 0.624351077   |
| O | -1.5741289584 | -0.070334683  | 0.7169361537  |
| C | -1.5608375923 | 1.8886723507  | 2.0353438568  |
| H | -6.6882054637 | 1.7842802138  | 1.2506360132  |
| H | -6.00563083   | -1.2913744588 | -1.6854410756 |
| H | -4.447803979  | 0.2315499925  | 3.4770026728  |
| H | -7.6799798468 | 1.6518218954  | -0.8093086358 |
| H | -4.8467267322 | -3.576149696  | 0.1793846641  |
| H | -4.0950747677 | -2.9007340757 | -1.25770659   |
| H | -2.5891667936 | -3.9705696845 | 0.5341421993  |
| H | -0.7575606158 | -2.4218753426 | 0.345232848   |
| H | -1.5508913353 | -2.7610487152 | -1.1900801937 |
| H | -2.7197662159 | -0.4760848929 | -0.9457166936 |
| H | 0.3201503563  | -0.6349017781 | -1.1306403847 |
| H | -0.8153104577 | -0.7982874863 | -2.4759739403 |
| H | 0.1678504499  | 1.538289659   | -2.31158256   |
| H | -1.5864716583 | 1.520353719   | -2.1809169544 |
| H | 0.3900110829  | 1.7005338062  | 0.1526751096  |
| H | -0.6975737413 | 2.977010412   | -0.402121316  |
| H | -2.6583773613 | 1.6023001403  | 0.2063578998  |
| H | -1.644804564  | 2.9793356413  | 2.0334524081  |
| H | -0.5962321586 | 1.6135176047  | 2.4715964873  |
| H | -2.3515110073 | 1.4803294942  | 2.6667697043  |

calc\_1d conf\_15

|   |               |               |               |
|---|---------------|---------------|---------------|
| C | -7.7370913546 | -0.7446304562 | 2.0321583009  |
| C | -7.8209819714 | 0.0492768964  | 0.8951641857  |
| C | -6.6916160653 | 0.3106643998  | 0.1034515995  |
| C | -5.4799881713 | -0.2467104538 | 0.4562686333  |
| C | -5.3718052815 | -1.0733038537 | 1.5909211403  |
| C | -6.5108985316 | -1.3013586166 | 2.3999095561  |
| O | -6.4567899303 | -2.0354219889 | 3.5085487339  |
| O | -8.9821738112 | 0.6132934322  | 0.4969486477  |
| C | -4.2123578966 | 0.0147828591  | -0.3070497792 |
| C | -3.324094575  | -1.2159682457 | -0.25035471   |
| O | -3.0596243566 | -1.5666063672 | 1.125143642   |
| C | -4.0944339293 | -1.6648136395 | 1.9743154776  |
| O | -3.9134220015 | -2.2411842353 | 3.0415263213  |
| C | -1.9737195209 | -1.12650084   | -0.9429749741 |
| C | -1.0201092298 | -0.0342206168 | -0.4564594364 |
| C | -1.1164242617 | 1.2835300271  | -1.2253163356 |
| C | -0.0423794274 | 2.2605004242  | -0.7487911799 |
| C | 1.3327652212  | 1.59825116    | -0.7971583448 |
| C | 1.3051607164  | 0.2577796839  | -0.0682199209 |
| O | 0.2850050243  | -0.5745063737 | -0.6012027516 |
| C | 2.6042653386  | -0.5141048289 | -0.180860676  |
| H | -8.6029362469 | -0.9364210419 | 2.6581306607  |
| H | -6.7950536048 | 0.9469040242  | -0.767903001  |
| H | -5.5049021135 | -2.285747491  | 3.6323731851  |
| H | -9.684114749  | 0.3642745779  | 1.1125645263  |

|   |               |               |               |
|---|---------------|---------------|---------------|
| H | -4.4249942583 | 0.2745670157  | -1.3482641527 |
| H | -3.689985433  | 0.8680101245  | 0.1427281216  |
| H | -3.8754349955 | -2.0565881458 | -0.6917501011 |
| H | -1.4659500913 | -2.0821376288 | -0.783677231  |
| H | -2.1439739721 | -1.0318732291 | -2.0219976371 |
| H | -1.2036743313 | 0.1547329878  | 0.6150414313  |
| H | -0.973058891  | 1.0651084989  | -2.2914879412 |
| H | -2.112154023  | 1.7265694759  | -1.1180428966 |
| H | -0.0559375636 | 3.1724854498  | -1.355045306  |
| H | -0.2628748903 | 2.5663095914  | 0.2829376041  |
| H | 1.6241690734  | 1.4189208668  | -1.83989237   |
| H | 2.0949165135  | 2.2479773901  | -0.3521078557 |
| H | 1.0819449054  | 0.443268208   | 0.997604426   |
| H | 3.4310782184  | 0.0558324403  | 0.2526786898  |
| H | 2.8350339022  | -0.7175848298 | -1.2307696297 |
| H | 2.5256165663  | -1.4693566514 | 0.3439113472  |

calc\_ld conf\_16

|   |               |               |               |
|---|---------------|---------------|---------------|
| C | -7.5042482974 | -0.2791492712 | 1.366160629   |
| C | -6.8996834687 | 0.9348030906  | 1.0693033896  |
| C | -5.5021376311 | 1.0598589732  | 1.0202108312  |
| C | -4.7119068927 | -0.0489702035 | 1.2599131847  |
| C | -5.3001857456 | -1.2922854104 | 1.5422450981  |
| C | -6.7133034191 | -1.3983973815 | 1.6187305084  |
| O | -7.3168881105 | -2.5442480029 | 1.9264199061  |
| O | -7.7146079498 | 1.988131319   | 0.8348275325  |
| C | -3.2104905812 | 0.0220889328  | 1.2639109254  |
| C | -2.62359767   | -1.3022022153 | 0.8144027328  |
| O | -3.1549879539 | -2.3866645465 | 1.6100475505  |
| C | -4.4780963137 | -2.4679569815 | 1.8073967194  |
| O | -4.9351543378 | -3.5284954324 | 2.2208181007  |
| C | -1.1130585387 | -1.4554865465 | 0.939131527   |
| C | -0.271431217  | -0.4900671408 | 0.0968073481  |
| C | 0.1157625474  | 0.8118551514  | 0.7981574214  |
| C | 0.9067356708  | 1.7054831534  | -0.1560320072 |
| C | 0.1527934661  | 1.8776558712  | -1.473379065  |
| C | -0.2344163843 | 0.5205382238  | -2.0541379902 |
| O | -0.9810506297 | -0.2300565712 | -1.1041171646 |
| C | -1.0867973583 | 0.6210806245  | -3.3025867961 |
| H | -8.5828183851 | -0.3577407035 | 1.4151439994  |
| H | -5.0461519214 | 2.021130241   | 0.7966645995  |
| H | -6.5977254533 | -3.1955369267 | 2.1294543942  |
| H | -7.1772215917 | 2.7689938023  | 0.6498800615  |
| H | -2.8626708292 | 0.8061379146  | 0.5878454784  |
| H | -2.8517170167 | 0.2644256501  | 2.2735549425  |
| H | -2.9185153817 | -1.4831284454 | -0.2237806429 |
| H | -0.8303611062 | -1.3616481495 | 1.9936932623  |
| H | -0.8878156292 | -2.4851847897 | 0.6464713075  |
| H | 0.6697349453  | -1.0059543003 | -0.1619250825 |
| H | -0.78417795   | 1.3355720441  | 1.138588625   |
| H | 0.7082571293  | 0.5783542948  | 1.6901661956  |
| H | 1.1104459949  | 2.6778153107  | 0.3044174959  |
| H | 1.8829679526  | 1.2435356734  | -0.3565460273 |
| H | -0.76459312   | 2.4579018388  | -1.3091150779 |
| H | 0.7597172953  | 2.4301722285  | -2.1994649288 |
| H | 0.6897593095  | -0.0380781138 | -2.2845268721 |
| H | -0.5490379008 | 1.1495632857  | -4.0946963392 |
| H | -2.0115430141 | 1.1651467929  | -3.0884843659 |

H -1.351782512 -0.3749932843 -3.6655714071

calc\_1d conf\_17

C -7.0042349774 0.0348018857 1.9373761032  
C -6.6490201414 0.8311172286 0.8560793439  
C -5.5551001835 0.5051236607 0.0390037366  
C -4.8135856256 -0.6230129737 0.3263458609  
C -5.1398680845 -1.4356276 1.4287017057  
C -6.2626955677 -1.1125615591 2.227209364  
O -6.6417697734 -1.8674194611 3.2556817619  
O -7.3358457556 1.9491418372 0.5312848617  
C -3.6654786707 -1.0846040999 -0.5217589812  
C -2.6075824325 -1.7717030745 0.3251876415  
O -3.2082521454 -2.8452030965 1.0885088049  
C -4.351858301 -2.6228083707 1.7500242557  
O -4.6955207423 -3.4409521381 2.598448173  
C -1.8202214965 -0.8959666163 1.3025541704  
C -0.9529221216 0.1966980546 0.6618494391  
C -1.6182765718 1.5695226062 0.575736037  
C -0.6951626097 2.5592719678 -0.1333068287  
C -0.219333697 1.9833057996 -1.4655460016  
C 0.3799334518 0.5940113802 -1.2671599194  
O -0.5546697911 -0.2614654029 -0.6215067898  
C 0.771914752 -0.0824941369 -2.5649491469  
H -7.8587548065 0.2723250517 2.5633341215  
H -5.3220259741 1.1404300959 -0.8077930549  
H -6.0337132302 -2.6524230218 3.2626228574  
H -8.0633266743 2.0665417903 1.1562872465  
H -4.0353359846 -1.8087392683 -1.2594370443  
H -3.2086296352 -0.2679366668 -1.082926918  
H -1.9002562799 -2.28017716 -0.3284406489  
H -2.504908139 -0.4333760022 2.0218749946  
H -1.1841505126 -1.5823082114 1.8693457279  
H -0.0467757611 0.3160513415 1.2811870059  
H -2.5703427966 1.4919834295 0.0390118825  
H -1.8544509203 1.9167278119 1.5880166783  
H -1.2003630175 3.5189820384 -0.2833712131  
H 0.1767750098 2.7603931513 0.5040698234  
H -1.0639192897 1.8997669322 -2.1618772201  
H 0.5219215534 2.641872868 -1.9322434773  
H 1.2687959881 0.6852457142 -0.61813655  
H 1.5280918273 0.5057169313 -3.0924509113  
H -0.1003645412 -0.1891502444 -3.2167076165  
H 1.1782836691 -1.0781024721 -2.3701292756

calc\_1d conf\_18

C -7.6470071758 -0.8324414368 2.2770009992  
C -7.8074566252 0.1778480827 1.336913968  
C -6.7528294742 0.5641752778 0.4955733897  
C -5.5380540115 -0.0825341029 0.5966454462  
C -5.3547211763 -1.124027 1.5268741947  
C -6.4178454224 -1.483315118 2.391305673  
O -6.2888200844 -2.4290159183 3.3188046403  
O -8.9747648619 0.8408065335 1.1869455235  
C -4.3505539574 0.302393752 -0.239819626  
C -3.4774632315 -0.9167014245 -0.4936275619  
O -3.115942336 -1.5582469041 0.7469299934

|   |               |               |               |
|---|---------------|---------------|---------------|
| C | -4.0750938227 | -1.8117298128 | 1.6514275407  |
| O | -3.8196441365 | -2.6034341655 | 2.5525794475  |
| C | -2.1882967105 | -0.6647863368 | -1.27087124   |
| C | -0.9541438436 | -0.2316206751 | -0.4801830247 |
| C | -1.0668470565 | 1.0802274425  | 0.2910479027  |
| C | 0.2880300266  | 1.4604976278  | 0.8890473771  |
| C | 1.375182661   | 1.4375089001  | -0.1814471674 |
| C | 1.3592476011  | 0.1039615027  | -0.9236169015 |
| O | 0.0688135908  | -0.1429064566 | -1.4627043042 |
| C | 2.3359044683  | 0.049854978   | -2.0809697979 |
| H | -8.4533240859 | -1.1256030436 | 2.9419431396  |
| H | -6.9141644141 | 1.3651071656  | -0.216651233  |
| H | -5.3430964139 | -2.7262164979 | 3.2873450211  |
| H | -9.622277851  | 0.4904108812  | 1.81280318    |
| H | -4.6725759833 | 0.714497825   | -1.200969284  |
| H | -3.7784277114 | 1.0870130458  | 0.2671006323  |
| H | -4.0826478682 | -1.6397921523 | -1.0555185524 |
| H | -1.9048743748 | -1.5824638578 | -1.7944832481 |
| H | -2.389291645  | 0.083550758   | -2.0461450938 |
| H | -0.6976121456 | -1.0300698766 | 0.233496388   |
| H | -1.4101450003 | 1.8690249399  | -0.3911867775 |
| H | -1.8070674617 | 0.9782190475  | 1.0907209233  |
| H | 0.2325635049  | 2.4446056041  | 1.3662139092  |
| H | 0.5432960797  | 0.7425882686  | 1.6798836931  |
| H | 1.2033302311  | 2.2405050895  | -0.9097236185 |
| H | 2.3630982593  | 1.6050777427  | 0.2626375652  |
| H | 1.5984364158  | -0.6996168731 | -0.2045492308 |
| H | 2.104147764   | 0.8328187743  | -2.8090769471 |
| H | 2.2752042788  | -0.916954912  | -2.586898916  |
| H | 3.3607340001  | 0.1957833254  | -1.7277980232 |

calc\_ld conf\_19

|   |               |               |               |
|---|---------------|---------------|---------------|
| C | -7.436762891  | -0.3116068365 | 1.9399609314  |
| C | -7.3411115681 | 0.3738947727  | 0.7356305326  |
| C | -6.2360490948 | 0.2051189528  | -0.1134096175 |
| C | -5.2222530919 | -0.6519930375 | 0.2645013654  |
| C | -5.2847403854 | -1.3411569796 | 1.488985046   |
| C | -6.4166452435 | -1.1848524175 | 2.3233388708  |
| O | -6.5457746539 | -1.8436056537 | 3.47241366    |
| O | -8.3005661115 | 1.2291200027  | 0.3172338622  |
| C | -4.030165441  | -0.933522492  | -0.6049760819 |
| C | -2.7953400152 | -1.2017557673 | 0.245879971   |
| O | -3.0785226627 | -2.2665657844 | 1.1847825414  |
| C | -4.2080491648 | -2.2350518107 | 1.9028491521  |
| O | -4.2929998122 | -2.9750607379 | 2.8784745716  |
| C | -2.2509304629 | 0.0126105604  | 1.0058297303  |
| C | -1.145488906  | 0.7817579097  | 0.2864517929  |
| C | -1.5248644203 | 1.4391593297  | -1.0390899542 |
| C | -0.3068192161 | 2.1463708187  | -1.6320850832 |
| C | 0.8671455595  | 1.1732424919  | -1.7255562904 |
| C | 1.1158570613  | 0.4949745299  | -0.3808670407 |
| O | -0.0721685512 | -0.1244617565 | 0.0951774792  |
| C | 2.1797499515  | -0.5821603016 | -0.4397851969 |
| H | -8.2956491589 | -0.1973382577 | 2.5938991836  |
| H | -6.2054483278 | 0.7463722373  | -1.0520633886 |
| H | -5.7582353341 | -2.444639006  | 3.537553541   |
| H | -9.0060917623 | 1.2615752891  | 0.9766634189  |
| H | -4.2331919698 | -1.8185650791 | -1.2217900033 |

|   |               |               |               |
|---|---------------|---------------|---------------|
| H | -3.846302305  | -0.102684564  | -1.2895759658 |
| H | -1.9929768149 | -1.6184668148 | -0.3642076441 |
| H | -3.0609857196 | 0.7005721072  | 1.272412634   |
| H | -1.817637     | -0.3602169684 | 1.9383864094  |
| H | -0.8130716003 | 1.5818829055  | 0.9716118366  |
| H | -1.8650695916 | 0.6689033866  | -1.7416669766 |
| H | -2.353546237  | 2.140705151   | -0.8880105521 |
| H | -0.5427536732 | 2.564547166   | -2.6162395579 |
| H | -0.0303348778 | 2.9925287368  | -0.98862043   |
| H | 0.6486797546  | 0.3968737479  | -2.4701076139 |
| H | 1.7771001896  | 1.6894148916  | -2.0518642364 |
| H | 1.4172601758  | 1.2676201467  | 0.3485533527  |
| H | 3.137040112   | -0.1611081905 | -0.7598791578 |
| H | 1.8895764328  | -1.36370842   | -1.1481431391 |
| H | 2.311136828   | -1.0427242587 | 0.5423480474  |

calc\_ld conf\_20

|   |               |               |               |
|---|---------------|---------------|---------------|
| C | -7.7172594296 | -1.2931976791 | 1.2070203994  |
| C | -7.8991523217 | 0.0784281939  | 1.3323290756  |
| C | -6.8069465009 | 0.9592855887  | 1.3511358592  |
| C | -5.5300142287 | 0.4501344411  | 1.2302781168  |
| C | -5.3184166538 | -0.9333986549 | 1.0821955598  |
| C | -6.4270134258 | -1.8140549625 | 1.0943426453  |
| O | -6.2838690697 | -3.1337872213 | 1.0005222887  |
| O | -9.1263010346 | 0.6325698775  | 1.4466704238  |
| C | -4.3056785629 | 1.3182169026  | 1.2805782136  |
| C | -3.203293315  | 0.7190889723  | 0.4221282775  |
| O | -2.9392879206 | -0.6377668025 | 0.8227405104  |
| C | -3.9717579013 | -1.4823946766 | 0.9596397162  |
| O | -3.7340719971 | -2.6857490978 | 0.9892691166  |
| C | -1.9065551906 | 1.5060490052  | 0.5115608294  |
| C | -0.6991900299 | 0.978605119   | -0.2658062126 |
| C | -1.0083553485 | 0.4459247335  | -1.6633562133 |
| C | 0.2706573972  | -0.0762822228 | -2.3158652319 |
| C | 0.9566519439  | -1.0758144389 | -1.3870947229 |
| C | 1.1552689732  | -0.4710251788 | 0.0002755527  |
| O | -0.0795498726 | -0.0123686417 | 0.5293898425  |
| C | 1.7206816536  | -1.4540452081 | 1.0053275459  |
| H | -8.5565151866 | -1.9817091935 | 1.2077159929  |
| H | -6.9888715024 | 2.0219151264  | 1.4629056271  |
| H | -5.3065773145 | -3.3079222629 | 0.9906518775  |
| H | -9.7933574296 | -0.0660080852 | 1.4200124549  |
| H | -4.5323577216 | 2.3323161287  | 0.9382121381  |
| H | -3.9477792009 | 1.3982247753  | 2.3158189434  |
| H | -3.5487484611 | 0.6846074844  | -0.6193840672 |
| H | -2.1322945723 | 2.5187964694  | 0.1566868862  |
| H | -1.6064823605 | 1.5909428139  | 1.561436962   |
| H | 0.0062511709  | 1.8237018375  | -0.3749990815 |
| H | -1.729133956  | -0.3745020919 | -1.5769099079 |
| H | -1.4661844173 | 1.2339885777  | -2.2738069272 |
| H | 0.0481568236  | -0.5359901342 | -3.2845570689 |
| H | 0.9497655587  | 0.7642274011  | -2.5146317993 |
| H | 0.3377699989  | -1.975895872  | -1.2856884561 |
| H | 1.9247696696  | -1.3869225169 | -1.7960381696 |
| H | 1.837735872   | 0.3942983309  | -0.0926949593 |
| H | 2.6959046418  | -1.8249616397 | 0.676835006   |
| H | 1.0425931168  | -2.3042092844 | 1.1210050243  |
| H | 1.8388081062  | -0.9763159137 | 1.9811479321  |



calc\_1d conf\_21

|   |               |               |               |
|---|---------------|---------------|---------------|
| C | -6.5533573767 | 0.5366852297  | 1.2263597118  |
| C | -6.662736375  | 0.1861500608  | -0.1135179534 |
| C | -5.8572401112 | -0.8183621478 | -0.670586424  |
| C | -4.9303786831 | -1.4602705115 | 0.1280124265  |
| C | -4.7916358627 | -1.1168569242 | 1.4835557379  |
| C | -5.6270948238 | -0.1172126982 | 2.0405880283  |
| O | -5.560315886  | 0.2280962721  | 3.3234122286  |
| O | -7.5462722158 | 0.7833053146  | -0.9428808207 |
| C | -4.0899323059 | -2.594896395  | -0.3814980167 |
| C | -2.7679268305 | -2.7529059994 | 0.3662157014  |
| O | -2.947668173  | -2.6473098679 | 1.7949401116  |
| C | -3.8137386389 | -1.7837332069 | 2.3366030663  |
| O | -3.753144198  | -1.5999623361 | 3.5486988792  |
| C | -1.5792762285 | -1.8961640313 | -0.0692696651 |
| C | -1.6707227179 | -0.3717840826 | -0.005881669  |
| C | -2.2512102856 | 0.283821317   | -1.2571264991 |
| C | -2.1634994181 | 1.805466919   | -1.1518342153 |
| C | -0.7362727495 | 2.2323406523  | -0.8172699941 |
| C | -0.2214836233 | 1.4677887642  | 0.3990903907  |
| O | -0.333013028  | 0.0671350405  | 0.1893777086  |
| C | 1.2342534653  | 1.7492039845  | 0.7124388119  |
| H | -7.1818220302 | 1.3035540642  | 1.6681599687  |
| H | -5.9832462133 | -1.0746735099 | -1.7163361166 |
| H | -4.8867261442 | -0.3723976636 | 3.7387677132  |
| H | -8.0447371153 | 1.4488005415  | -0.4505737539 |
| H | -4.6648772686 | -3.5222659356 | -0.2635084006 |
| H | -3.8897044473 | -2.4870829449 | -1.4516833791 |
| H | -2.4428260689 | -3.7890258524 | 0.2419095921  |
| H | -0.7440160515 | -2.1810266653 | 0.5777977304  |
| H | -1.3032322369 | -2.2019444422 | -1.0863979495 |
| H | -2.2682023787 | -0.0639235796 | 0.8682925701  |
| H | -1.6694686832 | -0.0624452637 | -2.1214530136 |
| H | -3.2892890207 | -0.0263766932 | -1.4078874065 |
| H | -2.5003299017 | 2.273830282   | -2.0827711402 |
| H | -2.8441977264 | 2.1523542465  | -0.3628338585 |
| H | -0.0738498021 | 2.0178016467  | -1.6657654665 |
| H | -0.6844418739 | 3.3105014153  | -0.6270482319 |
| H | -0.84200984   | 1.7399560965  | 1.2715025066  |
| H | 1.5560507787  | 1.1699123197  | 1.5813717017  |
| H | 1.3842537892  | 2.811528673   | 0.9253212371  |
| H | 1.8653383011  | 1.4723879116  | -0.1372918485 |

**Table S34.** Sampled and DFT geometry optimized conformers related to calc\_2a, with energy values (Hartree) and related % contribution on the final Boltzmann distribution for the three employed functional/basis set combinations.

| Conformer       | MPW1PW91/6-31g(d,p) |                                              | MPW1PW91/6-311+g(d,p) |                                              | B97-2/cc-pVTZ    |                                              |
|-----------------|---------------------|----------------------------------------------|-----------------------|----------------------------------------------|------------------|----------------------------------------------|
|                 | Energy (Hartree)    | % contribution on the Boltzmann distribution | Energy (Hartree)      | % contribution on the Boltzmann distribution | Energy (Hartree) | % contribution on the Boltzmann distribution |
| calc_2a conf_1  | -916.6428199        | 47.75%                                       | -916.8801926          | 15.17%                                       | -916.8298210     | 48.81%                                       |
| calc_2a conf_2  | -916.6426963        | 41.89%                                       | -916.8814972          | 60.41%                                       | -916.8295482     | 36.56%                                       |
| calc_2a conf_3  | -916.6409860        | 6.85%                                        | -916.8804583          | 20.10%                                       | -916.8283295     | 10.06%                                       |
| calc_2a conf_4  | -916.6403030        | 3.32%                                        | -916.8789241          | 3.96%                                        | -916.8274255     | 3.86%                                        |
| calc_2a conf_5  | -916.6372323        | 0.13%                                        | -916.8755818          | 0.11%                                        | -916.8243186     | 0.14%                                        |
| calc_2a conf_6  | -916.6353451        | 0.02%                                        | -916.8738058          | 0.02%                                        | -916.8227599     | 0.03%                                        |
| calc_2a conf_7  | -916.6353118        | 0.02%                                        | -916.8757050          | 0.13%                                        | -916.8244998     | 0.17%                                        |
| calc_2a conf_8  | -916.6350563        | 0.01%                                        | -916.8739557          | 0.02%                                        | -916.8235548     | 0.06%                                        |
| calc_2a conf_9  | -916.6342671        | 0.01%                                        | -916.8746861          | 0.04%                                        | -916.8247115     | 0.22%                                        |
| calc_2a conf_10 | -916.6339973        | 0.00%                                        | -916.8726469          | 0.01%                                        | -916.8225701     | 0.02%                                        |
| calc_2a conf_11 | -916.6338765        | 0.00%                                        | -916.8728533          | 0.01%                                        | -916.8217229     | 0.01%                                        |
| calc_2a conf_12 | -916.6332930        | 0.00%                                        | -916.8727808          | 0.01%                                        | -916.8218994     | 0.01%                                        |
| calc_2a conf_13 | -916.6326067        | 0.00%                                        | -916.8712038          | 0.00%                                        | -916.8207010     | 0.00%                                        |
| calc_2a conf_14 | -916.6322320        | 0.00%                                        | -916.8726368          | 0.01%                                        | -916.8224439     | 0.02%                                        |
| calc_2a conf_15 | -916.6316901        | 0.00%                                        | -916.8710877          | 0.00%                                        | -916.8211578     | 0.01%                                        |
| calc_2a conf_16 | -916.6309166        | 0.00%                                        | -916.8688316          | 0.00%                                        | -916.8178010     | 0.00%                                        |
| calc_2a conf_17 | -916.6303572        | 0.00%                                        | -916.8710994          | 0.00%                                        | -916.8211567     | 0.01%                                        |

**Table S35.** Cartesian coordinates of the optimized geometries for the conformers related to calc\_2a. The related energies and % contribution on the final Boltzmann distribution for the three employed functional/basis set combinations are reported in Table S34.

calc\_2a conf\_1

|   |               |               |               |
|---|---------------|---------------|---------------|
| C | -9.0252381199 | -1.7881653883 | -0.8340015369 |
| C | -8.9238618601 | -0.291809802  | -0.4272179486 |
| C | -7.5642500875 | -0.1647885362 | 0.2940965892  |
| N | -6.9502011441 | -1.5103604141 | 0.2626743554  |
| C | -7.577111816  | -2.2371786111 | -0.8258827118 |
| C | -5.5041333845 | -1.6361879407 | -0.0200156221 |
| C | -5.3544704201 | -1.7150888947 | -1.5686017551 |
| C | -6.7950979    | -1.8294093483 | -2.0807155869 |
| O | -9.6564036524 | -1.9205144199 | -2.0943029598 |
| O | -8.9593777057 | 0.5267787961  | -1.5703677302 |
| C | -4.5748083355 | -0.6123064358 | 0.6263043268  |
| C | -7.7016584877 | 0.2890026453  | 1.7497766721  |
| O | -7.0579357614 | -2.8039349737 | -3.0875187481 |
| O | -4.6298490006 | 0.6613932047  | 0.0360719763  |
| N | -8.0795040973 | 1.6819110385  | 1.8762343934  |
| O | -5.9544527089 | 2.4559794855  | 1.7372688796  |
| C | -7.1620050594 | 2.6739830458  | 1.8232614211  |
| C | -7.6955613695 | 4.0847687615  | 1.8903144489  |
| H | -7.4670441167 | -3.3218492086 | -0.6930319835 |
| H | -9.6025787066 | -2.3401410309 | -0.0849066504 |
| H | -9.7532037384 | -0.0212322161 | 0.2459875998  |
| H | -6.9715623246 | 0.5770060492  | -0.2506407566 |
| H | -5.2138847062 | -2.6078484041 | 0.4021486778  |
| H | -4.7796482631 | -2.5979653704 | -1.8650389732 |
| H | -4.8556840303 | -0.8237148635 | -1.9552472697 |
| H | -7.1502971345 | -0.848474263  | -2.4180453022 |
| H | -9.027190334  | -2.3622921977 | -2.691710041  |
| H | -9.4623018481 | 0.0004101101  | -2.2198532519 |
| H | -3.5544457316 | -1.001964572  | 0.5072334962  |
| H | -4.7655185618 | -0.5713852055 | 1.7064647669  |
| H | -8.4422788662 | -0.3278618861 | 2.2672290951  |
| H | -6.7529038788 | 0.161087639   | 2.2717522379  |
| H | -6.6548310904 | -2.5043833515 | -3.9122882833 |
| H | -5.0533778978 | 1.2830478143  | 0.6574504372  |
| H | -9.0558943554 | 1.9267095436  | 1.8425444651  |
| H | -7.1360219625 | 4.6338656911  | 2.650022302   |
| H | -7.5118561255 | 4.5751619188  | 0.9306786438  |
| H | -8.7625554173 | 4.140751591   | 2.1178723266  |

calc\_2a conf\_2

|   |               |               |               |
|---|---------------|---------------|---------------|
| C | -8.9091610546 | -1.0652231709 | -1.061132996  |
| C | -8.606556514  | 0.2426218929  | -0.3449356825 |
| C | -7.0875593197 | 0.3437783976  | -0.5200133663 |
| N | -6.6903398594 | -1.0021476989 | -0.0808471435 |
| C | -7.7016704791 | -1.9324348669 | -0.6731685038 |
| C | -5.4047998589 | -1.5653348708 | -0.5325676356 |
| C | -5.6466049015 | -2.0034203345 | -1.9729764484 |
| C | -7.0039833171 | -2.6938339507 | -1.8435802948 |
| O | -8.9408622414 | -0.8374004415 | -2.4556000059 |
| O | -9.3297215892 | 1.300525271   | -0.9035817301 |
| C | -4.2412275081 | -0.6658105846 | -0.1808968141 |
| C | -6.5051914474 | 1.5580495933  | 0.2026253616  |

|   |               |               |               |
|---|---------------|---------------|---------------|
| O | -6.7465779483 | -4.0496815888 | -1.5038245095 |
| O | -4.3356495958 | -0.3039837295 | 1.1901396226  |
| N | -6.767226238  | 1.6425877156  | 1.6248781093  |
| O | -8.7512091386 | 2.7246633783  | 1.418590544   |
| C | -7.8449415457 | 2.2843512583  | 2.1274342671  |
| C | -7.8844781582 | 2.449717176   | 3.6280488772  |
| H | -7.9863046708 | -2.6721621678 | 0.0833869799  |
| H | -9.8564070571 | -1.5120415445 | -0.7307156184 |
| H | -8.8234880193 | 0.1234901105  | 0.724351821   |
| H | -6.8994240569 | 0.5152637496  | -1.5928618671 |
| H | -5.2751741309 | -2.4857052116 | 0.0553044407  |
| H | -4.8959246283 | -2.6953061861 | -2.3610295361 |
| H | -5.7165614356 | -1.1430527891 | -2.6458348116 |
| H | -7.5912152977 | -2.628069462  | -2.7627589943 |
| H | -9.388145585  | 0.018013406   | -2.5615080579 |
| H | -9.2937276892 | 2.0173679495  | -0.238806938  |
| H | -3.2954224482 | -1.1931345214 | -0.3451779593 |
| H | -4.2270592803 | 0.2324866079  | -0.8143751343 |
| H | -5.427842499  | 1.6339035794  | 0.0664133491  |
| H | -6.9616104359 | 2.4345346431  | -0.2679041964 |
| H | -7.5950814127 | -4.5078459486 | -1.4628967692 |
| H | -5.2200517833 | -0.6081532401 | 1.4549316763  |
| H | -6.0261431536 | 1.3591255085  | 2.2458858632  |
| H | -7.0674829698 | 1.9433161497  | 4.1466829421  |
| H | -7.8474989733 | 3.516516402   | 3.8633936603  |
| H | -8.8376737582 | 2.0684295189  | 3.9999274985  |

calc\_2a conf\_3

|   |               |               |               |
|---|---------------|---------------|---------------|
| C | -8.9959640431 | -1.6193951558 | -0.910622647  |
| C | -8.8767397137 | -0.359612495  | -0.0104255835 |
| C | -7.3902711901 | -0.2768134808 | 0.408072903   |
| N | -6.912388065  | -1.6611619917 | 0.2694991253  |
| C | -7.5727670741 | -2.167445106  | -0.9383703575 |
| C | -5.4869948082 | -1.8822798727 | -0.0390224351 |
| C | -5.3104077119 | -1.6591159542 | -1.5694088786 |
| C | -6.7399978342 | -1.6302489723 | -2.1176550943 |
| O | -9.4652392619 | -1.3236883353 | -2.2081892675 |
| O | -9.3145800696 | 0.755890853   | -0.7398660996 |
| C | -4.4620510622 | -1.1782694943 | 0.8387040236  |
| C | -7.1947355465 | 0.2873196432  | 1.8270526077  |
| O | -6.8771297719 | -2.3948967428 | -3.2895302073 |
| O | -4.4258034658 | 0.2364160947  | 0.7354777686  |
| N | -6.7704474649 | 1.6720836213  | 1.8444329296  |
| O | -8.8053781805 | 2.5109493959  | 1.3090592666  |
| C | -7.6072805441 | 2.6852402816  | 1.5493482419  |
| C | -7.0093435216 | 4.0722083237  | 1.5529667215  |
| H | -7.5308935717 | -3.2633620153 | -0.9658250549 |
| H | -9.6782409135 | -2.3402057777 | -0.4473446575 |
| H | -9.4963966004 | -0.4937375254 | 0.8851686713  |
| H | -6.8945338462 | 0.4120759943  | -0.2926647307 |
| H | -5.3229377965 | -2.9513760639 | 0.1520705913  |
| H | -4.7555656834 | -2.481710325  | -2.0282119887 |
| H | -4.7734977245 | -0.7352979121 | -1.8134876011 |
| H | -7.0413958026 | -0.5933766058 | -2.3162259114 |
| H | -9.6905581552 | -0.3762246019 | -2.1878806348 |
| H | -9.3183414356 | 1.5099782436  | -0.1144809666 |
| H | -3.4744282025 | -1.6005847413 | 0.6047152598  |
| H | -4.660570056  | -1.3959699407 | 1.890661277   |

|   |               |               |               |
|---|---------------|---------------|---------------|
| H | -8.1257169479 | 0.2136293231  | 2.3955262821  |
| H | -6.4436464202 | -0.2892171241 | 2.3640565478  |
| H | -7.8057368603 | -2.2801272109 | -3.5439538643 |
| H | -4.1835901792 | 0.4573128143  | -0.1724836705 |
| H | -5.7734977037 | 1.8272828364  | 1.8260415515  |
| H | -5.9507107573 | 4.0931961961  | 1.8208990242  |
| H | -7.1407529529 | 4.5183124416  | 0.5639951213  |
| H | -7.567469061  | 4.6882213819  | 2.2619017369  |

calc\_2a conf\_4

|   |               |               |               |
|---|---------------|---------------|---------------|
| C | -8.945953715  | -1.6949082974 | -0.6364476942 |
| C | -8.7882312137 | -0.3008487952 | 0.025238083   |
| C | -7.2782987821 | -0.1537527352 | 0.3508222841  |
| N | -6.718733443  | -1.5145109376 | 0.1755964308  |
| C | -7.5098078545 | -2.1112044561 | -0.9057943905 |
| C | -5.3510416566 | -1.5969857054 | -0.386165126  |
| C | -5.464366166  | -1.2595096947 | -1.8881198992 |
| C | -6.9409213054 | -1.5308647848 | -2.2204854829 |
| O | -9.7249854459 | -1.6636171732 | -1.808956521  |
| O | -9.2450699825 | 0.6674710364  | -0.8873179786 |
| C | -4.326177465  | -0.8235071448 | 0.4122821063  |
| C | -7.0012940003 | 0.4114478237  | 1.7575061507  |
| O | -7.0772102749 | -2.4170847745 | -3.3073365463 |
| O | -4.2733968114 | -1.2707693638 | 1.75611044    |
| N | -6.7597084739 | 1.8459109952  | 1.7832163643  |
| O | -8.8224900463 | 2.4856555623  | 1.099169124   |
| C | -7.6882594879 | 2.77621477    | 1.4802268114  |
| C | -7.2681270978 | 4.218811477   | 1.6403597069  |
| H | -7.3682813524 | -3.1980268388 | -0.9262206452 |
| H | -9.4104271717 | -2.385072168  | 0.0762903658  |
| H | -9.3777350773 | -0.2431869041 | 0.9465937952  |
| H | -6.8667730157 | 0.5559969867  | -0.3828775731 |
| H | -5.077877686  | -2.6576353223 | -0.3010121242 |
| H | -4.8189678113 | -1.8984429775 | -2.4954383342 |
| H | -5.1909630893 | -0.2199519379 | -2.0955590298 |
| H | -7.4512721371 | -0.5859002364 | -2.4464152429 |
| H | -9.9374746486 | -0.7226067928 | -1.9445180712 |
| H | -9.3011194059 | 1.495170134   | -0.3721889562 |
| H | -4.5515375336 | 0.2536296521  | 0.3794256299  |
| H | -3.3355773952 | -0.9577385032 | -0.0360586616 |
| H | -7.8373160947 | 0.1762199498  | 2.4251255445  |
| H | -6.1076753586 | -0.05282886   | 2.1732505366  |
| H | -8.0329891451 | -2.5093509179 | -3.4357852133 |
| H | -5.0561277076 | -1.8263200272 | 1.8847027482  |
| H | -5.8582478911 | 2.1600831519  | 2.1037883087  |
| H | -7.9346595173 | 4.6972867497  | 2.3619141424  |
| H | -6.2351459041 | 4.346666973   | 1.9716204723  |
| H | -7.4027588352 | 4.732060087   | 0.6854584454  |

calc\_2a conf\_5

|   |               |               |               |
|---|---------------|---------------|---------------|
| C | -8.9300797112 | -1.5715042537 | -0.4871691338 |
| C | -8.6739907838 | -0.1151911245 | -0.0383440022 |
| C | -7.1776485978 | -0.0644980167 | 0.3513114492  |
| N | -6.6569832509 | -1.4439059621 | 0.1733445309  |
| C | -7.5336003128 | -2.0804222513 | -0.8137673977 |
| C | -5.3286321765 | -1.5792842307 | -0.4660159001 |
| C | -5.5372943149 | -1.2976675693 | -1.9634408785 |

|   |               |               |               |
|---|---------------|---------------|---------------|
| C | -7.0090982103 | -1.6665578035 | -2.2137666807 |
| O | -9.8270696538 | -1.6674319852 | -1.5652810269 |
| O | -8.9705275168 | 0.7143923444  | -1.1379727939 |
| C | -4.2472691016 | -0.7961599908 | 0.2451300786  |
| C | -6.9525520197 | 0.3614566303  | 1.803121061   |
| O | -7.1134163965 | -2.7165782947 | -3.1532136033 |
| O | -4.1366099569 | -1.197215644  | 1.5988563179  |
| N | -7.5267120999 | 1.6460234644  | 2.1993947702  |
| O | -7.7436868079 | 2.7555429834  | 0.2107713495  |
| C | -7.8148177356 | 2.7255416035  | 1.439536553   |
| C | -8.2577297584 | 3.9551877432  | 2.2031530837  |
| H | -7.4522666679 | -3.1712863152 | -0.7416536719 |
| H | -9.3416383778 | -2.143564581  | 0.3510169517  |
| H | -9.3102484066 | 0.1540859489  | 0.816058339   |
| H | -6.6881013138 | 0.6474718765  | -0.3200851968 |
| H | -5.0729403791 | -2.641629279  | -0.354388496  |
| H | -4.8822275754 | -1.903132037  | -2.5940929245 |
| H | -5.3503112139 | -0.2453724327 | -2.2013409283 |
| H | -7.5580756195 | -0.788377778  | -2.5713816165 |
| H | -9.8718258919 | -0.7703389614 | -1.9384214225 |
| H | -8.6456870544 | 1.6042638175  | -0.8973316514 |
| H | -4.4469078419 | 0.2844641598  | 0.1779258982  |
| H | -3.2834104238 | -0.9747818236 | -0.2429851298 |
| H | -7.4085012654 | -0.4038969429 | 2.4412783955  |
| H | -5.8797480592 | 0.3639762802  | 2.023088746   |
| H | -8.0615035683 | -2.8766634515 | -3.2615436131 |
| H | -4.9737332393 | -1.6345312965 | 1.8129158208  |
| H | -7.5970900635 | 1.7799103942  | 3.1958055205  |
| H | -8.3459217571 | 3.8093554381  | 3.2821396821  |
| H | -7.539926758  | 4.7567274225  | 2.011637716   |
| H | -9.2212161176 | 4.2825919182  | 1.8067098039  |

calc\_2a conf\_6

|   |               |               |               |
|---|---------------|---------------|---------------|
| C | -9.0095328405 | -1.4432301304 | -0.7004649528 |
| C | -8.673132616  | -0.0483529952 | -0.1157772281 |
| C | -7.2261610508 | -0.1572840526 | 0.420255519   |
| N | -6.8521066941 | -1.584231128  | 0.2816751552  |
| C | -7.6449532926 | -2.1008144748 | -0.8312585337 |
| C | -5.4786300756 | -1.9135518734 | -0.1372116177 |
| C | -5.4175072944 | -1.7015856517 | -1.6730390926 |
| C | -6.8864401528 | -1.7134058547 | -2.1187989785 |
| O | -9.7010092557 | -1.3734137988 | -1.9262196172 |
| O | -8.7852551303 | 0.881643606   | -1.1698271377 |
| C | -4.3445172812 | -1.296390912  | 0.6668551061  |
| C | -7.0811441672 | 0.2418466306  | 1.8884430988  |
| O | -7.1059238005 | -2.6204205754 | -3.1755778293 |
| O | -4.2080115311 | 0.1073005784  | 0.5695971524  |
| N | -7.6493980533 | 1.5348489925  | 2.2687260534  |
| O | -7.465515926  | 2.7380643273  | 0.3350346434  |
| C | -7.7315456594 | 2.6655368441  | 1.5354851444  |
| C | -8.1996202145 | 3.8949483634  | 2.2846639998  |
| H | -7.693163416  | -3.1962376548 | -0.789046709  |
| H | -9.6279802139 | -2.000106141  | 0.0107274761  |
| H | -9.3704687923 | 0.2164901862  | 0.6907159436  |
| H | -6.5937788913 | 0.4963623295  | -0.1861251518 |
| H | -5.3881864625 | -2.9940202323 | 0.0415183757  |
| H | -4.8667755316 | -2.5035926765 | -2.1712659341 |
| H | -4.9368641314 | -0.7560275292 | -1.9477401135 |

|   |               |               |               |
|---|---------------|---------------|---------------|
| H | -7.1892075425 | -0.7030203334 | -2.421862133  |
| H | -9.615972422  | -0.4452809387 | -2.2079282387 |
| H | -8.359643044  | 1.7047795109  | -0.8556518354 |
| H | -3.41104352   | -1.7995366429 | 0.3736789647  |
| H | -4.5018107115 | -1.5054344595 | 1.728602995   |
| H | -7.5865255105 | -0.5185289126 | 2.4912681695  |
| H | -6.0185850062 | 0.2315973138  | 2.1471565454  |
| H | -8.057408089  | -2.5708956953 | -3.3515680953 |
| H | -3.9956659066 | 0.3258219914  | -0.3462041387 |
| H | -7.8618762567 | 1.6294023411  | 3.2491489651  |
| H | -7.4016193671 | 4.6411392138  | 2.2542370913  |
| H | -9.0584938776 | 4.3180022044  | 1.7592537615  |
| H | -8.4725262714 | 3.7115782297  | 3.3265231766  |

calc\_2a conf\_7

|   |               |               |               |
|---|---------------|---------------|---------------|
| C | -9.0389938442 | -1.6023677418 | -0.8076975225 |
| C | -8.8942408553 | -0.2090541948 | -0.1407805263 |
| C | -7.4474239363 | -0.1543536582 | 0.4160876571  |
| N | -6.9541883753 | -1.5411743247 | 0.3340042064  |
| C | -7.6114109251 | -2.1245969079 | -0.8369306913 |
| C | -5.5232204355 | -1.7191408635 | 0.0130287319  |
| C | -5.3751128977 | -1.544623204  | -1.5215845274 |
| C | -6.8078132995 | -1.6418048372 | -2.0589735897 |
| O | -9.6131403314 | -1.5400039417 | -2.0935568456 |
| O | -9.136598499  | 0.7707022014  | -1.1206905458 |
| C | -4.5594158732 | -0.8718796651 | 0.8309389781  |
| C | -7.3616339902 | 0.3890520824  | 1.8561877173  |
| O | -6.9063655556 | -2.5179566976 | -3.1575959642 |
| O | -3.2188040065 | -1.0917136522 | 0.4489361488  |
| N | -6.9684763881 | 1.7863602403  | 1.9420921292  |
| O | -8.7936434346 | 2.6092058969  | 0.8871762776  |
| C | -7.7225386166 | 2.798347977   | 1.4629135405  |
| C | -7.1869212311 | 4.1945548745  | 1.6768639783  |
| H | -7.5511386934 | -3.2192334952 | -0.8017571209 |
| H | -9.6644827991 | -2.2432769844 | -0.1771756353 |
| H | -9.6166865006 | -0.099172862  | 0.6758944969  |
| H | -6.8867458003 | 0.5298374574  | -0.2402007895 |
| H | -5.3070862761 | -2.7698418685 | 0.2578783463  |
| H | -4.761775064  | -2.3348856983 | -1.9607234217 |
| H | -4.901913594  | -0.591781505  | -1.7747740487 |
| H | -7.1652510412 | -0.6436326685 | -2.3469097446 |
| H | -9.7234933256 | -0.5895886303 | -2.2752591001 |
| H | -9.1754991108 | 1.6159480587  | -0.6346608919 |
| H | -4.7015100083 | -1.067659458  | 1.905251661   |
| H | -4.7377023009 | 0.1940423147  | 0.6563013218  |
| H | -8.3240661801 | 0.2583831423  | 2.3622659597  |
| H | -6.6274288897 | -0.1855834464 | 2.4201943523  |
| H | -7.8459011741 | -2.5062469442 | -3.3956387727 |
| H | -3.0275894166 | -2.0298704948 | 0.5762754389  |
| H | -6.1022404218 | 2.0111796559  | 2.403294825   |
| H | -7.0742908063 | 4.6805170448  | 0.7049006124  |
| H | -7.9253314551 | 4.7679582891  | 2.2421674516  |
| H | -6.230924647  | 4.2273545085  | 2.2042559071  |

calc\_2a conf\_8

|   |               |              |               |
|---|---------------|--------------|---------------|
| C | -8.9364183686 | -1.26106666  | -0.4254765719 |
| C | -8.6525066805 | 0.1729288926 | -0.9448394261 |

|   |               |               |               |
|---|---------------|---------------|---------------|
| C | -7.1530473372 | 0.422355723   | -0.6577830258 |
| N | -6.6578177862 | -0.8171470137 | 0.0023263031  |
| C | -7.5559030094 | -1.8869243853 | -0.4057809288 |
| C | -5.3294695534 | -1.3413646531 | -0.385628424  |
| C | -5.5362204186 | -2.1052262047 | -1.7188436474 |
| C | -7.0579954844 | -2.3338783732 | -1.7920970608 |
| O | -9.8538813631 | -1.929264798  | -1.2694009831 |
| O | -8.8811410154 | 0.2409018826  | -2.3334589614 |
| C | -4.2227315708 | -0.3044613204 | -0.3917100308 |
| C | -6.9026374054 | 1.6417847388  | 0.2285288693  |
| O | -7.5056951623 | -3.6691852604 | -1.9867201761 |
| O | -3.9432792971 | 0.2021219564  | 0.892390602   |
| N | -7.3185278598 | 1.3550708403  | 1.5805426673  |
| O | -7.8655545201 | 3.4896729061  | 2.1027007189  |
| C | -7.7777268657 | 2.3167609915  | 2.427947558   |
| C | -8.1697344279 | 1.8321154861  | 3.808526406   |
| H | -7.4774944469 | -2.7442725106 | 0.2745713773  |
| H | -9.3484225465 | -1.2125304758 | 0.5885072742  |
| H | -9.2751332271 | 0.9114495297  | -0.4228241247 |
| H | -6.6779544735 | 0.5988668139  | -1.6318435121 |
| H | -5.0687140196 | -2.0687145656 | 0.3925625597  |
| H | -5.0008157635 | -3.0587885334 | -1.7149125748 |
| H | -5.1806672436 | -1.5245294507 | -2.5765891966 |
| H | -7.4943622415 | -1.6825304467 | -2.5570165629 |
| H | -9.4287819098 | -2.7440146793 | -1.5839713153 |
| H | -9.5931186638 | -0.4052169131 | -2.490986761  |
| H | -4.4582452828 | 0.5007398451  | -1.1054226399 |
| H | -3.3004851018 | -0.7772764717 | -0.7412351677 |
| H | -5.8445693652 | 1.934135941   | 0.1960764706  |
| H | -7.4710774302 | 2.5017868793  | -0.1341130173 |
| H | -7.3232752571 | -3.9226569043 | -2.9005428009 |
| H | -4.7831389988 | 0.4577698406  | 1.2960912926  |
| H | -7.2500855029 | 0.3870192795  | 1.8629505229  |
| H | -7.5198460153 | 2.3094569884  | 4.5463300068  |
| H | -9.1909977887 | 2.1581583803  | 4.017298225   |
| H | -8.1075265957 | 0.7479527046  | 3.9318460558  |

calc\_2a conf\_9

|   |               |               |               |
|---|---------------|---------------|---------------|
| C | -8.8454894554 | -1.0225025795 | -0.6812051774 |
| C | -8.1965345749 | 0.3667505145  | -0.7140601033 |
| C | -6.8847190564 | 0.1608237863  | 0.0476235806  |
| N | -6.6357390955 | -1.3060476932 | 0.0832401656  |
| C | -7.6546792368 | -1.9681762172 | -0.7436646569 |
| C | -5.366630498  | -1.7842403623 | -0.4987219472 |
| C | -5.5882315165 | -1.7153960831 | -2.0094626736 |
| C | -7.0224610659 | -2.231060491  | -2.1524061993 |
| O | -9.7266724768 | -1.2326836684 | -1.7743378432 |
| O | -7.9065233543 | 0.7181778029  | -2.0531376653 |
| C | -4.1575636208 | -1.1071899055 | 0.1105712139  |
| C | -6.9248275019 | 0.6939553038  | 1.4858987086  |
| O | -6.9686201574 | -3.6204360168 | -2.4348523609 |
| O | -4.1485642671 | -1.2787771066 | 1.5154298082  |
| N | -7.0890176199 | 2.1285070101  | 1.571610348   |
| O | -9.3223232957 | 2.0798071948  | 1.9635498479  |
| C | -8.2867851972 | 2.7183122075  | 1.8319002271  |
| C | -8.2618344267 | 4.2273774816  | 1.948292518   |
| H | -7.8983605629 | -2.9487633129 | -0.3190189053 |
| H | -9.3692085845 | -1.1626703071 | 0.2715651169  |



|   |                |               |               |
|---|----------------|---------------|---------------|
| H | -8.8303093912  | 1.1260066715  | -0.2420608348 |
| H | -6.1045468404  | 0.6956374922  | -0.5068459287 |
| H | -5.3021550291  | -2.846022103  | -0.2225784719 |
| H | -4.8961486     | -2.3294247088 | -2.5900270955 |
| H | -5.5307014077  | -0.6811651378 | -2.3615491314 |
| H | -7.5621272869  | -1.7069366322 | -2.944710004  |
| H | -10.6009358269 | -0.9139739719 | -1.5173167744 |
| H | -8.6420731299  | 0.3559786125  | -2.5736693589 |
| H | -4.1306846197  | -0.0378490568 | -0.1476801267 |
| H | -3.2448211923  | -1.5560823876 | -0.2954072483 |
| H | -7.7564924754  | 0.239506378   | 2.0287209806  |
| H | -5.9950789069  | 0.4158868963  | 1.9894584212  |
| H | -7.8771754777  | -3.9204344172 | -2.565305973  |
| H | -5.0627054452  | -1.4887911661 | 1.7584451155  |
| H | -6.2755303388  | 2.7117756019  | 1.4620812649  |
| H | -7.2729477585  | 4.6689374235  | 1.8025074546  |
| H | -8.9502894109  | 4.6474948063  | 1.2114005334  |
| H | -8.6334912979  | 4.5076881411  | 2.9367231747  |

calc\_2a conf\_10

|   |               |               |               |
|---|---------------|---------------|---------------|
| C | -8.935405349  | -1.8835560535 | -0.5962126635 |
| C | -8.9174379342 | -0.4183917732 | -0.0759531598 |
| C | -7.4534308321 | -0.1632771089 | 0.3538310248  |
| N | -6.7428594136 | -1.4546895612 | 0.1620895354  |
| C | -7.473725145  | -2.1457953559 | -0.8896744947 |
| C | -5.3750024034 | -1.3960207215 | -0.4008988715 |
| C | -5.5360307902 | -1.1051994119 | -1.9117442048 |
| C | -6.9921167712 | -1.5125624163 | -2.2115635328 |
| O | -9.7777748287 | -2.0028456593 | -1.7279981575 |
| O | -9.2968293118 | 0.4701879282  | -1.0984778311 |
| C | -4.4453890738 | -0.4965817279 | 0.3864567078  |
| C | -7.331546948  | 0.3246561327  | 1.7996506782  |
| O | -7.2039590553 | -2.4762479893 | -3.2363796689 |
| O | -4.2721702483 | -0.9909751999 | 1.7025553417  |
| N | -7.9142042663 | 1.6360654402  | 1.9848536369  |
| O | -6.1401209888 | 2.7174836749  | 1.0847016148  |
| C | -7.2685953908 | 2.7551384148  | 1.553288011   |
| C | -8.0420072375 | 4.0489277504  | 1.68357371    |
| H | -7.2192779637 | -3.2126137318 | -0.9104420637 |
| H | -9.2948153927 | -2.555659304  | 0.1895863638  |
| H | -9.5992524181 | -0.3085316748 | 0.7812668318  |
| H | -7.0627955444 | 0.6286556172  | -0.2977072109 |
| H | -4.983211551  | -2.4157224323 | -0.2932275618 |
| H | -4.8341949814 | -1.6963685074 | -2.5068135734 |
| H | -5.3651959407 | -0.0486139857 | -2.1410378473 |
| H | -7.5885257851 | -0.6178259499 | -2.422488127  |
| H | -9.2393495453 | -2.3399032359 | -2.4630890924 |
| H | -9.8632630059 | -0.0676720274 | -1.6823422651 |
| H | -4.8146279517 | 0.5386315313  | 0.3980771169  |
| H | -3.4585583273 | -0.4899190079 | -0.0871553875 |
| H | -7.8287114115 | -0.3800474333 | 2.4735386308  |
| H | -6.2817184758 | 0.3841237025  | 2.0933288016  |
| H | -7.0189446405 | -2.059907024  | -4.0879059445 |
| H | -5.1082724443 | -1.4139439343 | 1.9435495825  |
| H | -8.8858888505 | 1.7057059949  | 2.2393512776  |
| H | -8.8960318672 | 3.9812626423  | 2.3621633222  |
| H | -7.3628173694 | 4.8273246166  | 2.0343567984  |
| H | -8.4039405456 | 4.3457077813  | 0.6948926721  |

calc\_2a conf\_11

|   |               |               |               |
|---|---------------|---------------|---------------|
| C | -8.9948258629 | -1.4598172151 | -0.6345882926 |
| C | -8.6594651123 | -0.0609527874 | -0.0545972288 |
| C | -7.1906437564 | -0.1449517496 | 0.4218244718  |
| N | -6.8151413159 | -1.5738698287 | 0.3050392211  |
| C | -7.6294910094 | -2.1113219826 | -0.782823291  |
| C | -5.449457274  | -1.9158845765 | -0.1381890914 |
| C | -5.4196307832 | -1.7623222206 | -1.680944202  |
| C | -6.8979295764 | -1.7408586213 | -2.0888709941 |
| O | -9.7014045193 | -1.3936553951 | -1.8525964454 |
| O | -8.8351284245 | 0.8763300236  | -1.0935209421 |
| C | -4.3020386551 | -1.2537522058 | 0.597203364   |
| C | -6.9876928875 | 0.2921435296  | 1.8747449189  |
| O | -7.1731132809 | -2.6410760383 | -3.1388414947 |
| O | -4.2326510688 | 0.1250279447  | 0.2845873143  |
| N | -7.6197319117 | 1.5488980512  | 2.2722402705  |
| O | -7.4670048356 | 2.7648315383  | 0.3485405191  |
| C | -7.7567082703 | 2.6762372309  | 1.5415865205  |
| C | -8.3255237965 | 3.8689822861  | 2.2804135753  |
| H | -7.6709356699 | -3.2064914162 | -0.722905233  |
| H | -9.6041642463 | -2.0183460185 | 0.0831536493  |
| H | -9.3286724773 | 0.1820586124  | 0.7820745845  |
| H | -6.5862192828 | 0.4949374035  | -0.2265091655 |
| H | -5.3480122497 | -2.9845422776 | 0.0953153844  |
| H | -4.9161298832 | -2.6072682345 | -2.1585719391 |
| H | -4.9040857427 | -0.8459925467 | -1.9754734677 |
| H | -7.1852050425 | -0.7225434058 | -2.3827663297 |
| H | -9.6221185015 | -0.4651140847 | -2.1355218684 |
| H | -8.376713764  | 1.6936806169  | -0.8138962398 |
| H | -3.3786628942 | -1.7676533549 | 0.293694371   |
| H | -4.4284283953 | -1.4117112221 | 1.678966037   |
| H | -7.4056510197 | -0.4884988833 | 2.5164480848  |
| H | -5.9124172897 | 0.3531650939  | 2.0688733864  |
| H | -8.1294583962 | -2.5695421017 | -3.2785387666 |
| H | -3.4063162999 | 0.4739558797  | 0.6384051072  |
| H | -7.8707297424 | 1.6147894534  | 3.245586888   |
| H | -8.5412361029 | 3.6850377799  | 3.3355431959  |
| H | -7.614488889  | 4.6946745362  | 2.2015137895  |
| H | -9.2437717701 | 4.1844161866  | 1.7794003382  |

calc\_2a conf\_12

|   |               |               |               |
|---|---------------|---------------|---------------|
| C | -9.0203484916 | -1.397402325  | -0.6914499079 |
| C | -8.7203904857 | 0.0257810319  | -0.1583571334 |
| C | -7.2930823426 | -0.0460427783 | 0.4347909491  |
| N | -6.8818155028 | -1.4620047793 | 0.3388436602  |
| C | -7.6433829246 | -2.0397396336 | -0.7659321428 |
| C | -5.4866095196 | -1.7589837937 | -0.0352867532 |
| C | -5.4057486735 | -1.660418195  | -1.5831247925 |
| C | -6.8660189064 | -1.6970527614 | -2.0525993734 |
| O | -9.6883042122 | -1.3895210887 | -1.9319100447 |
| O | -8.8021013615 | 0.9100159025  | -1.2530184604 |
| C | -4.4193939672 | -0.9563839267 | 0.6941484823  |
| C | -7.2309374983 | 0.3746798029  | 1.9058854949  |
| O | -7.0633941485 | -2.6418560237 | -3.0795284622 |
| O | -3.1243478877 | -1.4154787102 | 0.3703627356  |
| N | -7.8264975247 | 1.6658732704  | 2.2410706079  |

|   |               |               |               |
|---|---------------|---------------|---------------|
| O | -7.5736945389 | 2.8248020017  | 0.2908282602  |
| C | -7.9047840868 | 2.7766452619  | 1.4757307187  |
| C | -8.4517392746 | 4.007013128   | 2.166227601   |
| H | -7.6773391575 | -3.1324695658 | -0.6751564372 |
| H | -9.6461128139 | -1.9332436266 | 0.0294056551  |
| H | -9.4491261407 | 0.3160143152  | 0.6107127214  |
| H | -6.6595508659 | 0.6178076179  | -0.1633172189 |
| H | -5.3222486616 | -2.8063550212 | 0.2442575414  |
| H | -4.8593214456 | -2.5017331143 | -2.0170902302 |
| H | -4.9135413088 | -0.7359885971 | -1.9096582873 |
| H | -7.1670481154 | -0.6989970462 | -2.3965700556 |
| H | -9.6022430371 | -0.4772519928 | -2.2597219923 |
| H | -8.4189245526 | 1.7568389665  | -0.9509004167 |
| H | -4.5198790662 | -1.0919870486 | 1.774393432   |
| H | -4.5211661062 | 0.1189939586  | 0.4776999192  |
| H | -7.762912814  | -0.3866495927 | 2.483787431   |
| H | -6.1890334724 | 0.363350951   | 2.244408055   |
| H | -8.012191966  | -2.6070969912 | -3.2725798532 |
| H | -2.98872818   | -1.2600744224 | -0.5730028141 |
| H | -8.1036815457 | 1.7689714048  | 3.2043956995  |
| H | -9.3113198095 | 4.3718124307  | 1.5996406004  |
| H | -8.7507122306 | 3.8458867472  | 3.2044778424  |
| H | -7.6883273631 | 4.7882442431  | 2.1341369685  |

calc\_2a conf\_13

|   |               |               |               |
|---|---------------|---------------|---------------|
| C | -8.9625560157 | -1.4332445971 | -0.5170484612 |
| C | -8.6088695982 | 0.0209431887  | -0.1826249012 |
| C | -7.1757002644 | -0.0337390022 | 0.3687392521  |
| N | -6.6833355432 | -1.4192899515 | 0.1452522751  |
| C | -7.5983775412 | -2.0694533255 | -0.8102378416 |
| C | -5.3730690807 | -1.5160149385 | -0.5302529044 |
| C | -5.6638836579 | -1.1619668193 | -1.9891083702 |
| C | -7.0107828288 | -1.8687426552 | -2.2424761868 |
| O | -9.9193896317 | -1.5450426523 | -1.5279177056 |
| O | -8.6721586191 | 0.7440880987  | -1.3932644243 |
| C | -4.2797709196 | -0.7755231407 | 0.2101861108  |
| C | -7.0788282599 | 0.2901260842  | 1.8586585435  |
| O | -6.8804555722 | -3.0896659419 | -2.9431139087 |
| O | -4.1595820188 | -1.2645911123 | 1.5334505516  |
| N | -7.586975831  | 1.6021652385  | 2.2532527849  |
| O | -7.6938135527 | 2.7625973041  | 0.2794629276  |
| C | -7.8012585162 | 2.7103218085  | 1.5022091192  |
| C | -8.2213714383 | 3.9274824088  | 2.3046907443  |
| H | -7.6303240888 | -3.1493855105 | -0.6187815334 |
| H | -9.3714062779 | -1.9132078136 | 0.3790997325  |
| H | -9.3101079611 | 0.4451375313  | 0.5472828561  |
| H | -6.5859863812 | 0.696260232   | -0.1891514566 |
| H | -5.1009139019 | -2.5822583975 | -0.482163043  |
| H | -4.9023993763 | -1.5046437462 | -2.6942081624 |
| H | -5.7713574155 | -0.0784651623 | -2.1071987512 |
| H | -7.6691684995 | -1.2630610891 | -2.8638948027 |
| H | -9.8214925954 | -0.7428855661 | -2.0658105508 |
| H | -8.4181523906 | 1.6534452895  | -1.1551125123 |
| H | -4.4733639223 | 0.3074345617  | 0.2120713811  |
| H | -3.3216198015 | -0.9295163171 | -0.296522703  |
| H | -7.6498877165 | -0.4657404318 | 2.4102613389  |
| H | -6.0330725816 | 0.1996164575  | 2.1742681004  |
| H | -6.3554195745 | -3.6897578963 | -2.3968879514 |

|   |               |               |              |
|---|---------------|---------------|--------------|
| H | -5.0176524285 | -1.6646383081 | 1.7402780982 |
| H | -7.6855488724 | 1.7280819198  | 3.2492573023 |
| H | -7.4734615812 | 4.1829444483  | 3.0615865437 |
| H | -8.3393787393 | 4.7674501119  | 1.6221848558 |
| H | -9.1721070044 | 3.7487396918  | 2.8165836529 |

calc\_2a conf\_14

|   |               |               |               |
|---|---------------|---------------|---------------|
| C | -9.0500828562 | -1.7721434218 | -0.778782263  |
| C | -8.9940485441 | -0.2867717058 | -0.3231123136 |
| C | -7.615705539  | -0.1289222415 | 0.3589372061  |
| N | -6.9818237255 | -1.4656901654 | 0.3169227663  |
| C | -7.5879552344 | -2.169278864  | -0.800724759  |
| C | -5.5405977111 | -1.5375494566 | 0.0096202449  |
| C | -5.4056985351 | -1.4513529908 | -1.5372143115 |
| C | -6.836271186  | -1.6768622524 | -2.0486376874 |
| O | -9.6903072019 | -1.8853527134 | -2.0367411478 |
| O | -9.1010114142 | 0.5693093379  | -1.4343895497 |
| C | -4.674037877  | -0.555264807  | 0.7740140657  |
| C | -7.715752924  | 0.3611380212  | 1.8052646351  |
| O | -7.0244965807 | -2.6533301731 | -3.0688199793 |
| O | -3.3395639753 | -0.8056950029 | 0.3712627302  |
| N | -8.1804940861 | 1.7284738123  | 1.9001998153  |
| O | -6.132742417  | 2.6211693916  | 1.5217546796  |
| C | -7.3350458258 | 2.7739812124  | 1.6882796359  |
| C | -7.9812681598 | 4.1420509256  | 1.6665135122  |
| H | -7.4336692279 | -3.2524507279 | -0.7143312964 |
| H | -9.5994481838 | -2.3684516742 | -0.0431540531 |
| H | -9.8078288098 | -0.0731825126 | 0.3873465119  |
| H | -7.062958906  | 0.6237817725  | -0.2189095562 |
| H | -5.2199774168 | -2.5400512251 | 0.3175024845  |
| H | -4.730057167  | -2.2224416078 | -1.9155573301 |
| H | -5.0082279909 | -0.4819340021 | -1.8508046067 |
| H | -7.2697565264 | -0.7235547618 | -2.3735262065 |
| H | -9.0568321379 | -2.2922238827 | -2.6529043174 |
| H | -9.5934175089 | 0.0414227391  | -2.0907125937 |
| H | -4.7989537708 | -0.7259981385 | 1.8536061368  |
| H | -4.9668536328 | 0.4819116692  | 0.5661434798  |
| H | -8.3910224477 | -0.2871350223 | 2.3713829922  |
| H | -6.7370433022 | 0.3146918339  | 2.2836649615  |
| H | -6.6361359211 | -2.3170185223 | -3.8864914433 |
| H | -2.7893067429 | -0.1055485199 | 0.7410273771  |
| H | -9.1723171623 | 1.9039483234  | 1.9035436596  |
| H | -7.3220780211 | 4.8482758176  | 2.1730623341  |
| H | -8.0837265154 | 4.4697093378  | 0.6276927143  |
| H | -8.9674848152 | 4.1653401975  | 2.1370714714  |

calc\_2a conf\_15

|   |               |               |               |
|---|---------------|---------------|---------------|
| C | -8.9439919306 | -1.7557997992 | -0.6930427533 |
| C | -8.7617613403 | -0.2347670347 | -0.4357239497 |
| C | -7.2828920487 | -0.0643893324 | -0.0092013905 |
| N | -6.7375797543 | -1.4381585112 | 0.1030873827  |
| C | -7.5162657413 | -2.2414139911 | -0.8310269067 |
| C | -5.3554317745 | -1.6692159803 | -0.3743842947 |
| C | -5.4224173534 | -1.7118514651 | -1.9220919397 |
| C | -6.9136416644 | -1.9551322306 | -2.219671275  |
| O | -9.7390903682 | -1.9713249086 | -1.8440590364 |
| O | -9.0103031564 | 0.5091060856  | -1.606392951  |

|   |               |               |               |
|---|---------------|---------------|---------------|
| C | -4.3352799929 | -0.7252894138 | 0.2266074237  |
| C | -7.1566865725 | 0.7150667225  | 1.2931945186  |
| O | -7.2415971551 | -3.057923741  | -3.0545648106 |
| O | -4.2251724156 | -0.891995437  | 1.6210290413  |
| N | -7.6988863658 | 2.0441837509  | 1.1048762613  |
| O | -7.2467796437 | 2.6844854318  | 3.2209664885  |
| C | -7.7104519428 | 2.9459516789  | 2.1224046855  |
| C | -8.328270925  | 4.2914454775  | 1.8032921869  |
| H | -7.3967605087 | -3.3110235605 | -0.6205392219 |
| H | -9.4278672607 | -2.2226972997 | 0.1703229713  |
| H | -9.4327098597 | 0.1012824097  | 0.3664281336  |
| H | -6.7930441989 | 0.5095720312  | -0.8115713584 |
| H | -5.0969483213 | -2.673135469  | -0.0162278859 |
| H | -4.8089637656 | -2.5241312616 | -2.3217572839 |
| H | -5.073403271  | -0.7759910474 | -2.3710013562 |
| H | -7.3651933069 | -1.0422580376 | -2.6258261246 |
| H | -9.2257274858 | -2.5173319922 | -2.4627585167 |
| H | -9.6229646482 | -0.0482118441 | -2.1214919854 |
| H | -4.5772208603 | 0.3162330987  | -0.0393747524 |
| H | -3.3502097484 | -0.9415870837 | -0.1980477336 |
| H | -7.7018393278 | 0.1911798011  | 2.0882695364  |
| H | -6.1158683362 | 0.7937321419  | 1.6215000941  |
| H | -6.9746440314 | -2.8479114986 | -3.9586761856 |
| H | -5.1158973042 | -1.0638905291 | 1.9565979261  |
| H | -8.128372854  | 2.2717207757  | 0.220901075   |
| H | -9.1534484252 | 4.472205462   | 2.4961883553  |
| H | -7.5816823283 | 5.0697685396  | 1.9780147643  |
| H | -8.6987340118 | 4.3784980618  | 0.7787508677  |

calc\_2a conf\_16

|   |               |               |               |
|---|---------------|---------------|---------------|
| C | -8.9644114101 | -0.8944784265 | -0.5175079932 |
| C | -8.4785861238 | 0.4518892069  | -1.102766798  |
| C | -6.989726908  | 0.5528160301  | -0.6898763165 |
| N | -6.6854364586 | -0.6904253691 | 0.0591913402  |
| C | -7.673170133  | -1.6735502849 | -0.3615609194 |
| C | -5.4137563664 | -1.3814662069 | -0.2272969828 |
| C | -5.605747431  | -2.1136319363 | -1.5715453366 |
| C | -7.138726933  | -2.2734369106 | -1.6816517977 |
| O | -9.8970692387 | -1.5108873509 | -1.3910464386 |
| O | -8.5617788787 | 0.4279779631  | -2.5155100257 |
| C | -4.2253284259 | -0.4587008373 | -0.0665762011 |
| C | -6.6128644956 | 1.8483564289  | 0.0692035321  |
| O | -7.6378779081 | -3.6019794994 | -1.7664987465 |
| O | -4.2486709653 | 0.1205124982  | 1.2234025921  |
| N | -6.6774293066 | 1.8081059854  | 1.515777935   |
| O | -8.9232069479 | 1.5657299588  | 1.6739891631  |
| C | -7.8348549794 | 1.6943374649  | 2.215885684   |
| C | -7.6941030325 | 1.7209102736  | 3.7232932878  |
| H | -7.7436096984 | -2.4885000802 | 0.3701034693  |
| H | -9.4274548772 | -0.7174652333 | 0.4562358619  |
| H | -9.0566214244 | 1.2863379399  | -0.6976938108 |
| H | -6.4418435833 | 0.5977800724  | -1.6426492982 |
| H | -5.324258613  | -2.1428680843 | 0.5594157856  |
| H | -5.1071559106 | -3.086982303  | -1.5766842924 |
| H | -5.211715778  | -1.5289672109 | -2.4094578738 |
| H | -7.5092018862 | -1.6828204968 | -2.525576085  |
| H | -9.5855771871 | -2.4109655928 | -1.5707122589 |
| H | -9.3312048758 | -0.1410095737 | -2.6961069596 |

|   |               |               |               |
|---|---------------|---------------|---------------|
| H | -4.2327438346 | 0.317682585   | -0.8477269849 |
| H | -3.2919387159 | -1.0202698418 | -0.1783869058 |
| H | -5.5825283775 | 2.1179952534  | -0.1694179054 |
| H | -7.2550907412 | 2.6522990146  | -0.307495519  |
| H | -7.4412001403 | -3.9424191513 | -2.6483542471 |
| H | -5.1781030857 | 0.063381844   | 1.5033117404  |
| H | -5.8226797862 | 1.9924524657  | 2.0157844022  |
| H | -8.3749755708 | 2.4741129178  | 4.1252330505  |
| H | -8.0091383762 | 0.7525637585  | 4.120374429   |
| H | -6.680211595  | 1.9305827287  | 4.072897424   |

calc\_2a conf\_17

|   |                |               |               |
|---|----------------|---------------|---------------|
| C | -8.9726266831  | -1.8163430188 | -0.9490636829 |
| C | -8.9944051157  | -0.6252996374 | 0.0434147369  |
| C | -7.5166287435  | -0.2231247779 | 0.2231923242  |
| N | -6.8528837172  | -1.5307890883 | 0.1228619407  |
| C | -7.4943161891  | -2.186007421  | -1.0284252624 |
| C | -5.4224647425  | -1.591738583  | -0.2552694576 |
| C | -5.3543385557  | -1.3115373594 | -1.7671669057 |
| C | -6.7522978701  | -1.6667087678 | -2.2918380411 |
| O | -9.4481397595  | -1.4279843007 | -2.2337660605 |
| O | -9.8548407853  | 0.4113355954  | -0.3614313106 |
| C | -4.5148546731  | -0.752976027  | 0.6177653921  |
| C | -7.3152904339  | 0.5132807782  | 1.5513646701  |
| O | -6.6824208584  | -2.6399477589 | -3.3117066083 |
| O | -4.6085050317  | -1.1379820891 | 1.974677388   |
| N | -7.9231650771  | 1.8238702343  | 1.5121466566  |
| O | -5.9542243339  | 2.906273804   | 1.1631875426  |
| C | -7.1726004501  | 2.9327273499  | 1.2471931451  |
| C | -7.9530877849  | 4.2219342171  | 1.1007723236  |
| H | -7.3251791997  | -3.2675345188 | -0.9840506097 |
| H | -9.5754164529  | -2.6499536922 | -0.5747369806 |
| H | -9.372306003   | -0.9709918368 | 1.0104976137  |
| H | -7.2304196379  | 0.4688353388  | -0.5891138091 |
| H | -5.1418253845  | -2.639983683  | -0.0878205511 |
| H | -4.6019901718  | -1.9288789079 | -2.2634160427 |
| H | -5.1103498688  | -0.2639144264 | -1.9687947788 |
| H | -7.2475284272  | -0.7697967444 | -2.6776120013 |
| H | -10.4132824626 | -1.4409254993 | -2.1956392339 |
| H | -9.666486846   | 0.5528618541  | -1.3021119558 |
| H | -4.7326100182  | 0.3178610783  | 0.4897975354  |
| H | -3.4773605773  | -0.9089297598 | 0.3049214533  |
| H | -7.7613023058  | -0.0762628207 | 2.3617362634  |
| H | -6.2644821105  | 0.6663865879  | 1.790618758   |
| H | -7.5743166207  | -2.712660734  | -3.6768139071 |
| H | -5.5071790088  | -1.4730046349 | 2.1012685627  |
| H | -8.9155624799  | 1.867052201   | 1.3328149343  |
| H | -7.689737738   | 4.6879107798  | 0.1485564331  |
| H | -9.0367206624  | 4.0912522644  | 1.1514937522  |
| H | -7.6438532194  | 4.9076940044  | 1.8934957729  |

**Table S36.** Sampled and DFT geometry optimized conformers related to calc\_2b, with energy values (Hartree) and related % contribution on the final Boltzmann distribution for the three employed functional/basis set combinations.

| Conformer       | MPW1PW91/6-31g(d,p) |                                              | MPW1PW91/6-311+g(d,p) |                                              | B97-2/cc-pVTZ    |                                              |
|-----------------|---------------------|----------------------------------------------|-----------------------|----------------------------------------------|------------------|----------------------------------------------|
|                 | Energy (Hartree)    | % contribution on the Boltzmann distribution | Energy (Hartree)      | % contribution on the Boltzmann distribution | Energy (Hartree) | % contribution on the Boltzmann distribution |
| calc_2b conf_1  | -916.6558506        | 66.58%                                       | -916.8926282          | 19.95%                                       | -916.8414899     | 26.77%                                       |
| calc_2b conf_2  | -916.6545098        | 16.09%                                       | -916.8935168          | 51.14%                                       | -916.8420943     | 50.77%                                       |
| calc_2b conf_3  | -916.6542962        | 12.83%                                       | -916.8927758          | 23.33%                                       | -916.8404895     | 9.28%                                        |
| calc_2b conf_4  | -916.6527150        | 2.40%                                        | -916.8886848          | 0.31%                                        | -916.8374863     | 0.39%                                        |
| calc_2b conf_5  | -916.6516843        | 0.81%                                        | -916.8908171          | 2.93%                                        | -916.8403837     | 8.29%                                        |
| calc_2b conf_6  | -916.6513944        | 0.59%                                        | -916.8889588          | 0.41%                                        | -916.8384095     | 1.02%                                        |
| calc_2b conf_7  | -916.6511811        | 0.47%                                        | -916.8900930          | 1.36%                                        | -916.8388397     | 1.62%                                        |
| calc_2b conf_8  | -916.6498398        | 0.11%                                        | -916.8873110          | 0.07%                                        | -916.8364653     | 0.13%                                        |
| calc_2b conf_9  | -916.6493910        | 0.07%                                        | -916.8890092          | 0.43%                                        | -916.8387838     | 1.52%                                        |
| calc_2b conf_10 | -916.6473366        | 0.01%                                        | -916.8841813          | 0.00%                                        | -916.8329573     | 0.00%                                        |
| calc_2b conf_11 | -916.6471566        | 0.01%                                        | -916.8857487          | 0.01%                                        | -916.8352583     | 0.04%                                        |
| calc_2b conf_12 | -916.6467867        | 0.00%                                        | -916.8849720          | 0.01%                                        | -916.8341934     | 0.01%                                        |
| calc_2b conf_13 | -916.6467284        | 0.00%                                        | -916.8856732          | 0.01%                                        | -916.8350680     | 0.03%                                        |
| calc_2b conf_14 | -916.6466014        | 0.00%                                        | -916.8852076          | 0.01%                                        | -916.8354701     | 0.05%                                        |
| calc_2b conf_15 | -916.6464851        | 0.00%                                        | -916.8840561          | 0.00%                                        | -916.8326546     | 0.00%                                        |
| calc_2b conf_16 | -916.6452414        | 0.00%                                        | -916.8835624          | 0.00%                                        | -916.8341376     | 0.01%                                        |
| calc_2b conf_17 | -916.6447394        | 0.00%                                        | -916.8859038          | 0.02%                                        | -916.8357834     | 0.06%                                        |
| calc_2b conf_18 | -916.6435924        | 0.00%                                        | -916.8831703          | 0.00%                                        | -916.8330099     | 0.00%                                        |
| calc_2b conf_19 | -916.6435609        | 0.00%                                        | -916.8827571          | 0.00%                                        | -916.8328211     | 0.00%                                        |
| calc_2b conf_20 | -916.6433206        | 0.00%                                        | -916.8835240          | 0.00%                                        | -916.8331326     | 0.00%                                        |
| calc_2b conf_21 | -916.6422478        | 0.00%                                        | -916.8820942          | 0.00%                                        | -916.8320366     | 0.00%                                        |
| calc_2b conf_22 | -916.6416031        | 0.00%                                        | -916.8819705          | 0.00%                                        | -916.8322649     | 0.00%                                        |
| calc_2b conf_23 | -916.6408353        | 0.00%                                        | -916.8800713          | 0.00%                                        | -916.8287722     | 0.00%                                        |
| calc_2b conf_24 | -916.6380444        | 0.00%                                        | -916.8766959          | 0.00%                                        | -916.8264854     | 0.00%                                        |

**Table S37.** Cartesian coordinates of the optimized geometries for the conformers related to calc\_2b. The related energies and % contribution on the final Boltzmann distribution for the three employed functional/basis set combinations are reported in Table S36.

calc\_2b conf\_1

|   |                |               |               |
|---|----------------|---------------|---------------|
| C | -6.8075237742  | -1.5203746315 | -1.692037999  |
| C | -7.6191987634  | -0.8858882976 | -0.56727615   |
| C | -6.581974372   | 0.041774871   | 0.0961781365  |
| N | -5.3349084474  | -0.7256721602 | 0.0236376069  |
| C | -5.4807780387  | -1.8000679438 | -1.0030273798 |
| C | -4.1092991292  | 0.0494561195  | -0.2594844501 |
| C | -3.7151822452  | -0.3329055522 | -1.6930986438 |
| C | -4.2079038224  | -1.7710618226 | -1.8714369634 |
| O | -6.6384471252  | -0.5796564967 | -2.7320250464 |
| O | -8.7316069063  | -0.2367976838 | -1.1147382967 |
| C | -3.0651863108  | -0.2913727507 | 0.8141387799  |
| C | -6.8821010552  | 0.4415244932  | 1.5489181032  |
| O | -3.2676912123  | -2.7451004369 | -1.4868629739 |
| O | -3.0785261749  | -1.6763639748 | 1.1070625828  |
| N | -7.7383715298  | 1.605977508   | 1.7052144703  |
| O | -9.696073753   | 0.5434742718  | 1.3106124739  |
| C | -9.0837396968  | 1.5696303716  | 1.6087683202  |
| C | -9.8140736157  | 2.8602565732  | 1.8939882499  |
| H | -5.5414059147  | -2.7827504959 | -0.5198032007 |
| H | -7.2767530975  | -2.4381996317 | -2.071556434  |
| H | -7.9215550748  | -1.6638677909 | 0.1493488504  |
| H | -6.5249195476  | 0.954958447   | -0.5159432868 |
| H | -4.327664788   | 1.1224634593  | -0.1914404961 |
| H | -4.2561900489  | 0.3104940419  | -2.3912121449 |
| H | -2.6433047942  | -0.2491173684 | -1.8925677217 |
| H | -4.4499726636  | -1.979608061  | -2.9151001208 |
| H | -7.5005878126  | -0.1424016302 | -2.8202077091 |
| H | -9.2985768899  | 0.0248475707  | -0.3628970019 |
| H | -3.274406827   | 0.2814682738  | 1.7299809383  |
| H | -2.0543407358  | -0.0384884667 | 0.4846666517  |
| H | -5.9396704443  | 0.6765371772  | 2.0496886994  |
| H | -7.3346944788  | -0.3994907    | 2.083247507   |
| H | -3.0017516268  | -2.5403559504 | -0.5697015708 |
| H | -4.0265381042  | -1.8551232846 | 1.2551706674  |
| H | -7.3011476228  | 2.4869259121  | 1.9212562788  |
| H | -10.386136178  | 3.144511506   | 1.00753463    |
| H | -10.5313277039 | 2.6811209106  | 2.698280526   |
| H | -9.1604696743  | 3.6882436239  | 2.1777241174  |

calc\_2b conf\_2

|   |               |               |               |
|---|---------------|---------------|---------------|
| C | -6.9389606379 | -1.839455981  | -1.2721040309 |
| C | -7.6643916    | -0.7270460284 | -0.5172259632 |
| C | -6.683556628  | 0.4379975352  | -0.6773121372 |
| N | -5.425638052  | -0.2159527286 | -0.3500246069 |
| C | -5.4970903486 | -1.6320150334 | -0.797669786  |
| C | -4.1692956724 | 0.3933204573  | -0.8067922099 |
| C | -3.3197217889 | -0.8123920443 | -1.2113322464 |
| C | -4.3437483078 | -1.7784758096 | -1.7952163786 |
| O | -7.0424630926 | -1.6312697578 | -2.6653900863 |
| O | -8.9397584633 | -0.4896157829 | -1.0357888864 |
| C | -3.5864128341 | 1.2555389255  | 0.3404498571  |
| C | -7.0072273806 | 1.6668622773  | 0.1631086458  |



|   |               |               |               |
|---|---------------|---------------|---------------|
| O | -3.8145843815 | -3.0806406646 | -1.8830376119 |
| O | -4.0001352933 | 0.7460678757  | 1.5869940198  |
| N | -7.1409369391 | 1.4160551705  | 1.5807626077  |
| O | -9.3396936944 | 0.8868101273  | 1.4423064299  |
| C | -8.3263605318 | 1.0563129132  | 2.122472709   |
| C | -8.3516877528 | 0.8870070285  | 3.6224976283  |
| H | -5.2922865702 | -2.3034225192 | 0.0462794793  |
| H | -7.3188255583 | -2.8343150537 | -1.004133733  |
| H | -7.7074021724 | -1.0063365411 | 0.5438478937  |
| H | -6.7102826136 | 0.7544656105  | -1.7335573394 |
| H | -4.3445046021 | 1.0305279116  | -1.6866554493 |
| H | -2.5243146642 | -0.5528428712 | -1.9136536928 |
| H | -2.8610511811 | -1.2715736863 | -0.3276041451 |
| H | -4.6754310276 | -1.4197033271 | -2.7774743209 |
| H | -7.9634430919 | -1.3697015885 | -2.8216995201 |
| H | -9.3984947843 | 0.0356801209  | -0.3525887745 |
| H | -3.9142596707 | 2.2994224861  | 0.2267608238  |
| H | -2.491045148  | 1.256701104   | 0.2901123808  |
| H | -7.9556482368 | 2.0785195256  | -0.1923283337 |
| H | -6.2438235161 | 2.4367969317  | 0.0229072592  |
| H | -4.4157950009 | -3.6003035764 | -2.4308024794 |
| H | -4.7144767021 | 0.1200714281  | 1.3231505469  |
| H | -6.3059019756 | 1.4636850552  | 2.1469886859  |
| H | -8.7217239227 | -0.1127852516 | 3.8603437418  |
| H | -7.3782788871 | 1.0335442573  | 4.0954372286  |
| H | -9.0623472755 | 1.6034615044  | 4.0419717942  |

calc\_2b conf\_3

|   |                |               |               |
|---|----------------|---------------|---------------|
| C | -6.8665426371  | -1.9521762691 | -1.1442396092 |
| C | -7.5843345575  | -0.8237112527 | -0.3971881649 |
| C | -6.618325309   | 0.3449010962  | -0.589820495  |
| N | -5.3561149999  | -0.3030517478 | -0.2375425611 |
| C | -5.3805222042  | -1.6281353845 | -0.9007687544 |
| C | -4.1078998756  | 0.3910155101  | -0.6200883662 |
| C | -3.38411108758 | -0.5513863185 | -1.5960449074 |
| C | -4.4970401078  | -1.4389446947 | -2.1406044317 |
| O | -7.1685717011  | -1.8907644382 | -2.523153709  |
| O | -8.8671774741  | -0.6233873339 | -0.9141112405 |
| C | -3.3233369926  | 0.7095637308  | 0.669840099   |
| C | -6.9538142489  | 1.6112603009  | 0.1868363287  |
| O | -3.9849173428  | -2.6343129206 | -2.6769891636 |
| O | -4.2221643818  | 0.9874732152  | 1.7209595982  |
| N | -7.1666286883  | 1.4435551192  | 1.6089596454  |
| O | -9.3510317921  | 0.8715669626  | 1.4101073345  |
| C | -8.3779811606  | 1.1310933113  | 2.1197715583  |
| C | -8.4870582043  | 1.1254451948  | 3.6257482244  |
| H | -4.9113225322  | -2.3838270301 | -0.2601088141 |
| H | -7.1375858821  | -2.9386835919 | -0.7472719004 |
| H | -7.6131738573  | -1.0745301634 | 0.6710890874  |
| H | -6.6460189652  | 0.6258806152  | -1.6576241265 |
| H | -4.367118168   | 1.3331155197  | -1.1198444117 |
| H | -2.8442296139  | -0.0200361359 | -2.3830757029 |
| H | -2.663175592   | -1.185173249  | -1.0661854339 |
| H | -5.0705087612  | -0.8920282475 | -2.8981418641 |
| H | -8.105588133   | -1.6405996418 | -2.5704559856 |
| H | -9.3262091991  | -0.0656315584 | -0.2553808501 |
| H | -2.673830589   | 1.5785909819  | 0.5347350524  |
| H | -2.6842129826  | -0.1479967134 | 0.9314002437  |

|   |               |               |               |
|---|---------------|---------------|---------------|
| H | -7.868824643  | 2.028217815   | -0.2438434113 |
| H | -6.1587735641 | 2.3499567723  | 0.0588628761  |
| H | -4.715549544  | -3.0569181322 | -3.1475095872 |
| H | -4.8981510221 | 0.2925112091  | 1.5712355586  |
| H | -6.3948180946 | 1.6639006006  | 2.2204803741  |
| H | -9.194560119  | 1.9017643639  | 3.9282735993  |
| H | -8.9014568555 | 0.16709694    | 3.9456617991  |
| H | -7.5353193285 | 1.294385565   | 4.1340321117  |

calc\_2b conf\_4

|   |                |               |               |
|---|----------------|---------------|---------------|
| C | -6.9454285826  | -1.5962470955 | -1.4525350484 |
| C | -7.7020871632  | -0.7980389477 | -0.3813418488 |
| C | -6.6200641575  | 0.1400963137  | 0.2041748072  |
| N | -5.3285716924  | -0.4882687582 | -0.0925036855 |
| C | -5.5741254736  | -1.7608995152 | -0.8102763205 |
| C | -4.3189477212  | 0.3088636215  | -0.8236196746 |
| C | -3.9600950849  | -0.520477894  | -2.068498622  |
| C | -4.3616118715  | -1.9579662519 | -1.730666486  |
| O | -6.8685017511  | -0.8190246037 | -2.6223579318 |
| O | -8.7786229448  | -0.1225465562 | -0.9885652265 |
| C | -3.1389401219  | 0.5508274477  | 0.1259111798  |
| C | -6.7303546616  | 0.3496501435  | 1.7221799525  |
| O | -3.3335194263  | -2.689982267  | -1.1042733151 |
| O | -2.8038154556  | -0.6480171188 | 0.8007433753  |
| N | -8.0598691316  | 0.6259489266  | 2.2533227565  |
| O | -8.7644152419  | 2.0898632108  | 0.6726429279  |
| C | -8.9426847702  | 1.5123714368  | 1.7465231395  |
| C | -10.195918577  | 1.7450635385  | 2.557373268   |
| H | -5.6179029209  | -2.5994193733 | -0.1038471903 |
| H | -7.4218017453  | -2.5659161001 | -1.6567875684 |
| H | -8.0718881422  | -1.4811345835 | 0.3984968245  |
| H | -6.6949944711  | 1.1077337733  | -0.2996749859 |
| H | -4.7395258355  | 1.2789020027  | -1.1158503774 |
| H | -4.5566594827  | -0.174218228  | -2.9131480525 |
| H | -2.9006363568  | -0.4624981981 | -2.3336860576 |
| H | -4.6409370437  | -2.5211674987 | -2.6238710466 |
| H | -7.7038282833  | -0.3170492435 | -2.626432313  |
| H | -8.8558495824  | 0.7592643796  | -0.5743168842 |
| H | -3.3993767072  | 1.33170601    | 0.8562444564  |
| H | -2.2508961099  | 0.8823534895  | -0.4178246302 |
| H | -6.0390789954  | 1.1481360338  | 2.0190286754  |
| H | -6.3894815494  | -0.5697455202 | 2.2051580208  |
| H | -2.9124504666  | -2.0943423959 | -0.4553897956 |
| H | -3.6759629191  | -0.9542226171 | 1.1183332084  |
| H | -8.2778452185  | 0.2181638785  | 3.1483564247  |
| H | -10.2745831546 | 2.8129496534  | 2.7738710408  |
| H | -11.0613091086 | 1.4731604315  | 1.9483296784  |
| H | -10.2314180779 | 1.1871284751  | 3.4957773246  |

calc\_2b conf\_5

|   |               |               |               |
|---|---------------|---------------|---------------|
| C | -6.7825739263 | -1.7426225167 | -1.5318658426 |
| C | -7.5158053712 | -1.191293345  | -0.3110484506 |
| C | -6.5906368096 | -0.0443975341 | 0.1520302395  |
| N | -5.2475636134 | -0.5418203151 | -0.1492806356 |
| C | -5.3276688178 | -1.6943381984 | -1.0801430769 |
| C | -4.27921142   | 0.4319192744  | -0.6744512773 |
| C | -3.3257839517 | -0.4431580865 | -1.4795789466 |

|   |                |               |               |
|---|----------------|---------------|---------------|
| C | -4.2532106109  | -1.4447053792 | -2.1531571207 |
| O | -6.9872649152  | -0.8669691933 | -2.6188018638 |
| O | -8.7988095648  | -0.7958968096 | -0.6996052958 |
| C | -3.6234129514  | 1.1778275681  | 0.4910803878  |
| C | -6.7426129805  | 0.3361550779  | 1.642174229   |
| O | -3.5364128721  | -2.6025833964 | -2.5261551058 |
| O | -3.2967994206  | 0.2845613804  | 1.5257439645  |
| N | -7.5414987659  | 1.5226563676  | 1.8898064285  |
| O | -9.5477579447  | 0.5320982123  | 1.5550079474  |
| C | -8.8896040392  | 1.5288430501  | 1.8567625093  |
| C | -9.5682476657  | 2.8257394199  | 2.2262186318  |
| H | -5.0761334377  | -2.6233734555 | -0.5521434546 |
| H | -7.1123810615  | -2.7611968487 | -1.7816061264 |
| H | -7.5503210091  | -1.9640152578 | 0.4736548489  |
| H | -6.8231148521  | 0.8404254188  | -0.4608168284 |
| H | -4.7737119172  | 1.1597635656  | -1.3392444396 |
| H | -2.7259133284  | 0.128157053   | -2.1918391917 |
| H | -2.6476428247  | -0.9776911884 | -0.8054790271 |
| H | -4.7259588442  | -0.9794634746 | -3.0255862063 |
| H | -7.9055619009  | -0.5632067874 | -2.5187949978 |
| H | -9.2186768437  | -0.3631794905 | 0.0738853534  |
| H | -4.3065412206  | 1.9654978226  | 0.8528131629  |
| H | -2.7096352009  | 1.679164622   | 0.1541090988  |
| H | -5.7548978502  | 0.5206979778  | 2.0674903729  |
| H | -7.1859234297  | -0.4957917541 | 2.1988714925  |
| H | -4.0829468116  | -3.1005319826 | -3.1458196174 |
| H | -3.9166336559  | -0.4585027595 | 1.3839256382  |
| H | -7.0623065327  | 2.3751942123  | 2.1297075326  |
| H | -8.8755963834  | 3.6323587464  | 2.476616264   |
| H | -10.2004797485 | 3.141895855   | 1.3933448879  |
| H | -10.2247475061 | 2.6427821491  | 3.0801745152  |

calc\_2b conf\_6

|   |               |               |               |
|---|---------------|---------------|---------------|
| C | -6.5767415182 | -1.9398427352 | -1.5604375083 |
| C | -7.4736655297 | -1.3879157914 | -0.4534155569 |
| C | -6.6976758772 | -0.1418093715 | 0.0046955261  |
| N | -5.2992481762 | -0.5638022284 | -0.0605105899 |
| C | -5.1841656164 | -1.7442166485 | -0.9615285098 |
| C | -4.3332706093 | 0.4680875957  | -0.4834114389 |
| C | -3.9241130538 | 0.0670346832  | -1.9079995737 |
| C | -4.0147185945 | -1.4614409573 | -1.9297891709 |
| O | -6.843091169  | -1.1148054346 | -2.6905152969 |
| O | -8.792784055  | -1.1313965855 | -0.8641490497 |
| C | -3.1878283287 | 0.5129107974  | 0.5347656522  |
| C | -7.0946855214 | 0.345788497   | 1.3914580923  |
| O | -2.8292005456 | -2.1076328581 | -1.5480944255 |
| O | -2.7888366103 | -0.7957347211 | 0.9096676997  |
| N | -8.4765834347 | 0.7660536843  | 1.4047166989  |
| O | -8.1301749414 | 2.5564017466  | 2.7534644928  |
| C | -8.8879197128 | 1.8692862227  | 2.0848185115  |
| C | -10.364101368 | 2.1884712131  | 1.9684292742  |
| H | -4.9317185768 | -2.6447633112 | -0.3874034075 |
| H | -6.7909654626 | -2.9889172567 | -1.7935756768 |
| H | -7.526293069  | -2.1122824889 | 0.3667445998  |
| H | -6.9081693652 | 0.6610331051  | -0.7212390974 |
| H | -4.8216877247 | 1.4493432674  | -0.4820703516 |
| H | -4.6546714648 | 0.4793026798  | -2.610224331  |
| H | -2.9282569325 | 0.4115030043  | -2.1989370462 |

|   |                |               |               |
|---|----------------|---------------|---------------|
| H | -4.2357466686  | -1.8313361447 | -2.9360917645 |
| H | -6.5095059056  | -1.5531851678 | -3.4817697437 |
| H | -8.709754399   | -0.7715690718 | -1.7625737494 |
| H | -3.5094532532  | 1.0689545063  | 1.4252697286  |
| H | -2.3065762261  | 1.0109865596  | 0.1233542189  |
| H | -6.4932394414  | 1.2047868174  | 1.7002184484  |
| H | -6.9096496785  | -0.4579448076 | 2.1182628632  |
| H | -2.5826710767  | -1.7510165674 | -0.6705958045 |
| H | -3.6195012854  | -1.2046611606 | 1.2109382858  |
| H | -9.1229079276  | 0.2535115683  | 0.8206694377  |
| H | -10.8208623736 | 2.101620098   | 2.957672875   |
| H | -10.4739722599 | 3.2277015792  | 1.6509554747  |
| H | -10.9035922464 | 1.5404956833  | 1.2732302132  |

calc\_2b conf\_7

|   |                |               |               |
|---|----------------|---------------|---------------|
| C | -6.68367873    | -2.0734876136 | -1.1824130631 |
| C | -7.3750501844  | -1.2714673245 | -0.0614807053 |
| C | -6.4668177379  | -0.0483406862 | 0.1470105273  |
| N | -5.135642442   | -0.647328554  | 0.0011858894  |
| C | -5.2279385466  | -1.5894504296 | -1.1318823041 |
| C | -4.0215706956  | 0.2842947058  | -0.3060003243 |
| C | -3.5954506036  | 0.0042159177  | -1.7614661851 |
| C | -4.7753156372  | -0.7610906122 | -2.3406029447 |
| O | -7.2564432595  | -1.7879805556 | -2.4409616886 |
| O | -8.6874064943  | -1.0001839245 | -0.4564537296 |
| C | -2.8997901437  | 0.0614070178  | 0.7067904331  |
| C | -6.6106005332  | 0.6445106796  | 1.5107019136  |
| O | -4.4199276916  | -1.524860907  | -3.4633798466 |
| O | -3.3965309511  | 0.0877597301  | 2.0241915342  |
| N | -7.5637455553  | 1.7395458626  | 1.5403271881  |
| O | -9.4207109738  | 0.4566923128  | 1.7069150576  |
| C | -8.8949103654  | 1.5706549299  | 1.675463921   |
| C | -9.7245106872  | 2.8258391931  | 1.7996494167  |
| H | -4.5215926268  | -2.4174409114 | -1.000327317  |
| H | -6.7581237475  | -3.1500875988 | -0.9861710049 |
| H | -7.349862218   | -1.8678641642 | 0.8619942006  |
| H | -6.6884847366  | 0.6880226586  | -0.6451708958 |
| H | -4.3833315315  | 1.3137726302  | -0.1941539332 |
| H | -3.3614941425  | 0.9136788433  | -2.3193798611 |
| H | -2.7100064045  | -0.6424134212 | -1.7917723599 |
| H | -5.5774364908  | -0.0577863651 | -2.5969951457 |
| H | -8.1722212283  | -1.5208074422 | -2.2506902278 |
| H | -9.1348197166  | -0.5643464942 | 0.2988046787  |
| H | -2.1439790723  | 0.848014737   | 0.6256443266  |
| H | -2.4053261667  | -0.8990154549 | 0.491822852   |
| H | -5.6423772956  | 1.0512391368  | 1.8124111094  |
| H | -6.905261146   | -0.0890860976 | 2.2683998659  |
| H | -5.2535500301  | -1.8807392842 | -3.8031518282 |
| H | -4.1128469055  | -0.5689766204 | 2.0054765282  |
| H | -7.2024127898  | 2.6790404376  | 1.5122429221  |
| H | -10.4593281525 | 2.8429357974  | 0.991369694   |
| H | -10.2786310036 | 2.783351148   | 2.7402669367  |
| H | -9.1408733628  | 3.7487787231  | 1.7717843696  |

calc\_2b conf\_8

|   |               |               |               |
|---|---------------|---------------|---------------|
| C | -6.8140483469 | -1.8719041619 | -2.0699457526 |
| C | -7.9100716628 | -0.8359618986 | -1.8090415256 |

|   |               |               |               |
|---|---------------|---------------|---------------|
| C | -7.2052863147 | 0.2248985022  | -0.9170043031 |
| N | -6.0723885629 | -0.4558073618 | -0.310476889  |
| C | -6.054464409  | -1.8598509655 | -0.7441081235 |
| C | -4.7292551007 | 0.1262043057  | -0.3862348935 |
| C | -3.8592306253 | -0.9591600352 | -1.0445182002 |
| C | -4.5755193572 | -2.2760393636 | -0.7326660147 |
| O | -6.0703654552 | -1.3505638038 | -3.1684942797 |
| O | -8.4912536095 | -0.3186694263 | -2.9729339626 |
| C | -4.2469031852 | 0.5255874546  | 1.0162900559  |
| C | -8.2010270651 | 0.7619449047  | 0.114585197   |
| O | -4.1929092519 | -2.8348998254 | 0.4953385675  |
| O | -4.5013659371 | -0.4765583482 | 1.9766760608  |
| N | -7.7039473765 | 1.8325219591  | 0.953676968   |
| O | -7.0981281501 | 0.5103161105  | 2.6970873652  |
| C | -7.2300951928 | 1.6282382256  | 2.2074724286  |
| C | -6.8882018917 | 2.8746358774  | 2.9944944493  |
| H | -6.5963110203 | -2.5016308517 | -0.0356654757 |
| H | -7.2255469427 | -2.856815234  | -2.3211496642 |
| H | -8.713873944  | -1.313685213  | -1.2362900262 |
| H | -6.8683798449 | 1.0494670132  | -1.5625752253 |
| H | -4.7412641891 | 1.0326508973  | -1.0083132739 |
| H | -3.8394604889 | -0.7931367615 | -2.1241901838 |
| H | -2.8302582167 | -0.9791146784 | -0.6755756772 |
| H | -4.3705221167 | -3.0432811168 | -1.4877812394 |
| H | -5.5146897478 | -2.0529284075 | -3.5255050985 |
| H | -7.7655394015 | -0.2827019376 | -3.6170781872 |
| H | -4.7297163812 | 1.4648640939  | 1.3155947947  |
| H | -3.1664208544 | 0.7026071353  | 1.0089685743  |
| H | -8.4850709307 | -0.0544808274 | 0.7831778232  |
| H | -9.0989518541 | 1.1166021031  | -0.4040557674 |
| H | -4.2585412518 | -2.1200761102 | 1.1641353564  |
| H | -5.458915462  | -0.4249134673 | 2.1662771209  |
| H | -7.7931540715 | 2.7800557988  | 0.6242373149  |
| H | -6.9570224252 | 3.7992732822  | 2.4159914381  |
| H | -7.5665019493 | 2.94191558    | 3.8491670669  |
| H | -5.8763974124 | 2.7733965522  | 3.3924331819  |

calc\_2b conf\_9

|   |               |               |               |
|---|---------------|---------------|---------------|
| C | -6.8419608461 | -1.7519588169 | -1.7003288569 |
| C | -7.6095191294 | -1.3222091149 | -0.4520827964 |
| C | -6.6316442673 | -0.3368318234 | 0.2197166153  |
| N | -5.3056112009 | -0.8546366028 | -0.1065303266 |
| C | -5.4289572112 | -1.8995874968 | -1.1454040614 |
| C | -4.304209041  | 0.1152422968  | -0.5405780482 |
| C | -3.330630328  | -0.7402914704 | -1.3424060195 |
| C | -4.2584818371 | -1.6799067895 | -2.1200706403 |
| O | -6.885255592  | -0.6986287687 | -2.6371271063 |
| O | -8.8296478343 | -0.7459604196 | -0.826732576  |
| C | -3.649863154  | 0.8693617895  | 0.6069396111  |
| C | -6.8655397304 | -0.1721942315 | 1.7377107555  |
| O | -3.6540923545 | -2.8619687295 | -2.5882045722 |
| O | -4.5157155474 | 1.8103952136  | 1.231230852   |
| N | -7.2969903757 | 1.1520901669  | 2.1280561492  |
| O | -9.4046531663 | 0.8791606794  | 1.3504125619  |
| C | -8.5447307781 | 1.5914598052  | 1.8748360647  |
| C | -8.8599893054 | 3.0071316133  | 2.2954387775  |
| H | -5.3358707667 | -2.8981999758 | -0.6901813378 |
| H | -7.2256535971 | -2.6850630604 | -2.1347484117 |

|   |               |               |               |
|---|---------------|---------------|---------------|
| H | -7.7616059048 | -2.1958666001 | 0.2032647865  |
| H | -6.7848923629 | 0.6434813179  | -0.2573650617 |
| H | -4.7575423397 | 0.8638166253  | -1.222459716  |
| H | -2.6726696059 | -0.1571336895 | -1.9910680507 |
| H | -2.7026286471 | -1.3274423589 | -0.6578932142 |
| H | -4.6305721176 | -1.1726815993 | -3.0122293622 |
| H | -7.7750919487 | -0.3197012655 | -2.5286972851 |
| H | -9.1528832125 | -0.208171062  | -0.0719070609 |
| H | -2.7423975458 | 1.3745827535  | 0.245109863   |
| H | -3.3578162969 | 0.1623316686  | 1.3869096884  |
| H | -5.9340922327 | -0.3834294786 | 2.2618209759  |
| H | -7.6183547408 | -0.8842430775 | 2.0893422847  |
| H | -3.3186339771 | -3.3419334191 | -1.8191263365 |
| H | -4.7625040039 | 2.4531905236  | 0.553396579   |
| H | -6.5693900479 | 1.8036635034  | 2.3803854133  |
| H | -8.0114678991 | 3.5290654409  | 2.743583857   |
| H | -9.2124679606 | 3.5667148645  | 1.4257875301  |
| H | -9.6799730928 | 2.9813515882  | 3.0171984754  |

calc\_2b conf\_10

|   |                |               |               |
|---|----------------|---------------|---------------|
| C | -7.0754529885  | -1.2147352621 | -1.0376276931 |
| C | -7.2430362325  | 0.3173168345  | -0.9212526647 |
| C | -6.253868544   | 0.68976625    | 0.1825084699  |
| N | -5.1160207824  | -0.2144672175 | 0.0026704978  |
| C | -5.6595487891  | -1.5112611741 | -0.4675628199 |
| C | -4.0415562319  | 0.2324965837  | -0.9204567615 |
| C | -4.0068352049  | -0.8136261507 | -2.044081202  |
| C | -4.6061260824  | -2.0811438697 | -1.4330394941 |
| O | -7.2046681717  | -1.6241359295 | -2.3964799566 |
| O | -6.8323119124  | 0.9353324891  | -2.1215214442 |
| C | -2.748743967   | 0.329834308   | -0.0969916079 |
| C | -6.815391256   | 0.5037110195  | 1.5994705288  |
| O | -3.6604230499  | -2.8859932026 | -0.7723658687 |
| O | -2.6425145749  | -0.7722038377 | 0.7850333367  |
| N | -7.9602337561  | 1.333294016   | 1.9011582758  |
| O | -9.4979444132  | -0.2671562575 | 1.4442370645  |
| C | -9.2361178046  | 0.8674415027  | 1.8202628833  |
| C | -10.3187635682 | 1.8444519134  | 2.2235806288  |
| H | -5.7558421244  | -2.2069365673 | 0.3718234746  |
| H | -7.8327711053  | -1.7125720022 | -0.4263100615 |
| H | -8.276598067   | 0.5908272127  | -0.6805312728 |
| H | -5.9296865289  | 1.727723328   | 0.0573603354  |
| H | -4.2791357779  | 1.2183791253  | -1.3293652504 |
| H | -4.6412008114  | -0.4713035906 | -2.8652754339 |
| H | -3.0040037704  | -0.9987759841 | -2.4381290701 |
| H | -5.0783976506  | -2.714385569  | -2.1847331809 |
| H | -8.107583473   | -1.9347538577 | -2.5317801689 |
| H | -6.9943583836  | 0.2661958184  | -2.8096021792 |
| H | -2.7451119681  | 1.2679541035  | 0.4775128864  |
| H | -1.8649113396  | 0.3262858258  | -0.7398571102 |
| H | -6.0173408056  | 0.7156124252  | 2.3168549292  |
| H | -7.1286264329  | -0.5318918012 | 1.7504096676  |
| H | -3.1159998636  | -2.2982062199 | -0.2123535049 |
| H | -3.5360033095  | -0.7945512562 | 1.1845543188  |
| H | -7.8053882888  | 2.2836281812  | 2.1955521644  |
| H | -10.902961988  | 1.4028182192  | 3.034247352   |
| H | -9.9412856699  | 2.817582808   | 2.5470750461  |
| H | -10.9952353116 | 1.9894477853  | 1.3780048855  |

calc\_2b conf\_11

|   |                |               |               |
|---|----------------|---------------|---------------|
| C | -6.9327349157  | -1.6318355617 | -1.5156860139 |
| C | -7.663895802   | -0.8719537647 | -0.4015862099 |
| C | -6.5667123964  | 0.0474383173  | 0.1866153342  |
| N | -5.2849011443  | -0.5785470525 | -0.1557008287 |
| C | -5.5377598835  | -1.8128365345 | -0.9276086424 |
| C | -4.3204804134  | 0.2471375229  | -0.8987059991 |
| C | -3.426365592   | -0.8088648559 | -1.5388380831 |
| C | -4.3879587336  | -1.9352645782 | -1.9352978575 |
| O | -6.8722344317  | -0.8026571103 | -2.6519541191 |
| O | -8.7568053168  | -0.1837030829 | -0.9619480138 |
| C | -3.5966208968  | 1.1672144873  | 0.0830315712  |
| C | -6.6311891365  | 0.2025859572  | 1.7121996323  |
| O | -3.8349240597  | -3.2352789067 | -1.8354673163 |
| O | -3.1361238331  | 0.4400708908  | 1.1954465117  |
| N | -7.9272566271  | 0.5407553638  | 2.290454103   |
| O | -8.6872501278  | 1.9915439192  | 0.7168764062  |
| C | -8.8087094179  | 1.4455732229  | 1.8151626385  |
| C | -9.994978296   | 1.7471408251  | 2.7016631451  |
| H | -5.5254000657  | -2.6899693563 | -0.2688664526 |
| H | -7.4156609875  | -2.5907614265 | -1.7509480152 |
| H | -8.0114129884  | -1.5795078123 | 0.3669461691  |
| H | -6.6457125849  | 1.0306907839  | -0.2867667237 |
| H | -4.8211877021  | 0.8484003367  | -1.6729708333 |
| H | -2.8525649778  | -0.4119574385 | -2.3813557881 |
| H | -2.7284402697  | -1.1933059646 | -0.78804921   |
| H | -4.7784510989  | -1.7600558359 | -2.9439643156 |
| H | -7.7049043215  | -0.2968426545 | -2.6165763089 |
| H | -8.8276404265  | 0.6840857032  | -0.5159287182 |
| H | -4.2787564391  | 1.9765212276  | 0.3930336823  |
| H | -2.7366658831  | 1.6401375696  | -0.4026833893 |
| H | -5.8804940636  | 0.938314777   | 2.0250255557  |
| H | -6.3398403923  | -0.7571043625 | 2.1485375537  |
| H | -3.1988480284  | -3.3365278962 | -2.5539139274 |
| H | -3.7882660365  | -0.2807084036 | 1.278002373   |
| H | -8.1036891679  | 0.1754604407  | 3.2127880976  |
| H | -10.0014150808 | 1.1955436231  | 3.6444587873  |
| H | -10.0016610158 | 2.8184874683  | 2.9162026506  |
| H | -10.910087445  | 1.5215801618  | 2.1493725546  |

calc\_2b conf\_12

|   |               |               |               |
|---|---------------|---------------|---------------|
| C | -6.2288353468 | -2.6407197421 | -0.9094431273 |
| C | -7.4923459948 | -1.8561088308 | -0.4740284837 |
| C | -6.9766550827 | -0.5289738008 | 0.1181374122  |
| N | -5.5009457887 | -0.5735803124 | 0.0191758276  |
| C | -5.1416074405 | -1.5765965195 | -0.9831690269 |
| C | -4.8510108532 | 0.6902059586  | -0.409202261  |
| C | -4.3855458016 | 0.4856961429  | -1.86945276   |
| C | -5.0667967956 | -0.8092553397 | -2.3066987513 |
| O | -6.3987907168 | -3.3280989243 | -2.1274860754 |
| O | -8.2691479958 | -1.6588978173 | -1.6479392507 |
| C | -3.7063560855 | 0.993130783   | 0.562765182   |
| C | -7.4411184768 | -0.2865638874 | 1.5539667471  |
| O | -4.3371662538 | -1.4782299461 | -3.3023481084 |
| O | -4.1236801571 | 0.786137128   | 1.8979397988  |
| N | -7.0895492806 | 1.0219071996  | 2.0487992853  |

|   |               |               |               |
|---|---------------|---------------|---------------|
| O | -9.1869272014 | 1.8612989029  | 1.8113017928  |
| C | -8.0120869837 | 2.0212233462  | 2.1125402723  |
| C | -7.4868884297 | 3.352234719   | 2.6063130946  |
| H | -4.1476250683 | -1.9958214365 | -0.7822380426 |
| H | -5.9815992453 | -3.3726848778 | -0.1332406475 |
| H | -8.0749625104 | -2.4276811862 | 0.2586070961  |
| H | -7.3853523718 | 0.2799530848  | -0.5037266142 |
| H | -5.5879808738 | 1.4957614081  | -0.3318063643 |
| H | -4.6282167092 | 1.3331860176  | -2.5138740947 |
| H | -3.3012912909 | 0.3303147497  | -1.9175886154 |
| H | -6.0893812896 | -0.5906914635 | -2.6517532454 |
| H | -7.2319795837 | -2.9885499263 | -2.4988932283 |
| H | -9.1654645152 | -1.4066025059 | -1.3959339919 |
| H | -3.3814289036 | 2.0329300111  | 0.4741463386  |
| H | -2.842527984  | 0.3517991193  | 0.3318606975  |
| H | -7.0144517574 | -1.0572798761 | 2.2078913661  |
| H | -8.531227573  | -0.3503625876 | 1.6075017687  |
| H | -4.7887836324 | -2.3292183799 | -3.4131203095 |
| H | -4.5046547739 | -0.1114167428 | 1.8564659857  |
| H | -6.1072605384 | 1.2236340761  | 2.2063960915  |
| H | -7.7450554799 | 4.1247551458  | 1.8783246792  |
| H | -7.9963080703 | 3.6047701398  | 3.5397896491  |
| H | -6.407993144  | 3.3623961707  | 2.7780199136  |

calc\_2b conf\_13

|   |               |               |               |
|---|---------------|---------------|---------------|
| C | -6.4317990895 | -2.4728624896 | -1.3430893019 |
| C | -7.2681817166 | -2.0852505268 | -0.1040193035 |
| C | -6.7688634939 | -0.6952245648 | 0.2701901471  |
| N | -5.3319947314 | -0.7710034167 | 0.0033809379  |
| C | -5.1630741509 | -1.6132185022 | -1.2059201508 |
| C | -4.6444506205 | 0.5214507947  | -0.254844523  |
| C | -4.0388545013 | 0.4146632313  | -1.6628326227 |
| C | -4.9275848386 | -0.6118537155 | -2.3422523993 |
| O | -7.1311565383 | -2.1485729052 | -2.5220471016 |
| O | -8.6515699609 | -2.1312097354 | -0.3976875469 |
| C | -3.6016828217 | 0.7865482783  | 0.8266725333  |
| C | -7.1450917273 | -0.3397457828 | 1.7073252415  |
| O | -4.3245200845 | -1.1645456362 | -3.4837925682 |
| O | -4.1483001649 | 0.6314222567  | 2.1227692239  |
| N | -7.0769635203 | 1.0694598695  | 2.0050865882  |
| O | -9.0888853047 | 1.4358836579  | 1.0419120651  |
| C | -8.0871187306 | 1.8792802176  | 1.5946794863  |
| C | -7.9106112481 | 3.3541987283  | 1.8731724611  |
| H | -4.2663190344 | -2.2364439677 | -1.1095060372 |
| H | -6.19176016   | -3.5434450929 | -1.3387640436 |
| H | -7.0551274482 | -2.7852589888 | 0.7138429878  |
| H | -7.2678348381 | 0.03299804    | -0.3943794986 |
| H | -5.3896252737 | 1.3266812709  | -0.2225003531 |
| H | -4.013329401  | 1.3727580459  | -2.1868297235 |
| H | -3.0141847672 | 0.0249439946  | -1.6228070395 |
| H | -5.8882341086 | -0.1493360662 | -2.5992178747 |
| H | -8.07142765   | -2.2156519325 | -2.2765368224 |
| H | -9.0371968368 | -1.2628985968 | -0.2097140902 |
| H | -3.2245573661 | 1.8105813339  | 0.7579073473  |
| H | -2.7500143114 | 0.1046782588  | 0.689679643   |
| H | -6.5082383102 | -0.8908900027 | 2.4054490406  |
| H | -8.1765499996 | -0.6566334119 | 1.8857751497  |
| H | -5.0123798151 | -1.6844867095 | -3.9216282574 |



|   |               |              |              |
|---|---------------|--------------|--------------|
| H | -4.4655586445 | -0.286043688 | 2.1232191987 |
| H | -6.1767258224 | 1.4369191708 | 2.286936274  |
| H | -7.9300194178 | 3.8998731023 | 0.9264303034 |
| H | -8.7608124729 | 3.7023024674 | 2.4643159182 |
| H | -6.986401078  | 3.5899330133 | 2.4056247112 |

calc\_2b conf\_14

|   |               |               |               |
|---|---------------|---------------|---------------|
| C | -6.5354555209 | -2.201367372  | -1.8058537946 |
| C | -7.653096493  | -1.6705506776 | -0.9046169271 |
| C | -7.049179126  | -0.4080581765 | -0.2633299399 |
| N | -5.5925724952 | -0.6269720388 | -0.2829308644 |
| C | -5.2993759796 | -1.9090434758 | -0.9634931476 |
| C | -4.765181638  | 0.4187163769  | -0.9045093468 |
| C | -3.4892872128 | -0.3437116607 | -1.2478411731 |
| C | -3.9871422347 | -1.7094206067 | -1.7302743434 |
| O | -6.5109719077 | -1.4350994747 | -2.9882873194 |
| O | -8.8126476136 | -1.3143844096 | -1.6363259861 |
| C | -4.5579447937 | 1.5558102771  | 0.0976390545  |
| C | -7.6299844065 | -0.1941175065 | 1.135193886   |
| O | -3.1218129163 | -2.7886734061 | -1.4340638459 |
| O | -4.3207483609 | 1.0257444878  | 1.3890109935  |
| N | -7.2452342727 | 1.0441207846  | 1.7633333507  |
| O | -9.3652723077 | 1.8454249232  | 1.9586713837  |
| C | -8.1639906147 | 1.9766311675  | 2.1402530006  |
| C | -7.5876822514 | 3.2045498921  | 2.8143174376  |
| H | -5.1585262875 | -2.7112001884 | -0.2287680077 |
| H | -6.6404235945 | -3.2726040934 | -2.032646164  |
| H | -7.893745529  | -2.406750877  | -0.1252825988 |
| H | -7.3124024958 | 0.4522401524  | -0.8923373861 |
| H | -5.2325105395 | 0.8132233244  | -1.8194075919 |
| H | -2.8779440286 | 0.1825180161  | -1.9865601795 |
| H | -2.8913044172 | -0.4901088062 | -0.3416318906 |
| H | -4.2027198727 | -1.6710255145 | -2.8042163709 |
| H | -7.4357892319 | -1.1771385079 | -3.1436016806 |
| H | -9.379226348  | -2.0920764249 | -1.7151111554 |
| H | -5.4473259932 | 2.2006558504  | 0.1130118753  |
| H | -3.7033822868 | 2.1742998682  | -0.1967531998 |
| H | -7.33811939   | -1.0438678722 | 1.7678974792  |
| H | -8.7210968433 | -0.1754306218 | 1.0678761239  |
| H | -2.3569648494 | -2.7203903063 | -2.0183630018 |
| H | -4.6162759445 | 0.0942926426  | 1.3020872059  |
| H | -6.2615948467 | 1.1965353731  | 1.9620169209  |
| H | -7.9330419482 | 4.0921808047  | 2.2792611576  |
| H | -7.9841404632 | 3.2655749516  | 3.831107274   |
| H | -6.4958849447 | 3.2114731254  | 2.857528772   |

calc\_2b conf\_15

|   |               |               |               |
|---|---------------|---------------|---------------|
| C | -6.6562235621 | -2.1598478158 | -0.8617009442 |
| C | -7.5046303845 | -1.0018979589 | -0.2770771102 |
| C | -6.4874692415 | 0.0073042853  | 0.2978490161  |
| N | -5.146376412  | -0.5757396353 | 0.0867094263  |
| C | -5.2569310051 | -1.5683412673 | -0.9825635252 |
| C | -4.1027272345 | 0.3866112942  | -0.3492596803 |
| C | -3.8654201622 | 0.1404918869  | -1.8572999085 |
| C | -5.0029816103 | -0.7870692232 | -2.2756642599 |
| O | -7.1522843264 | -2.6255498416 | -2.0971332729 |
| O | -8.2485320153 | -0.4585651359 | -1.3410866205 |

|   |                |               |               |
|---|----------------|---------------|---------------|
| C | -2.8569165216  | 0.1698128505  | 0.5079341216  |
| C | -6.6333454182  | 0.2827657825  | 1.7922399411  |
| O | -4.6501672854  | -1.6038222445 | -3.3624322014 |
| O | -3.1913839551  | 0.1630711251  | 1.8747166881  |
| N | -7.8846242848  | 0.8867762211  | 2.2421653496  |
| O | -8.8848203882  | 1.6064164268  | 0.3099545434  |
| C | -8.8519398902  | 1.5140469909  | 1.5364079944  |
| C | -9.9550442048  | 2.1336444008  | 2.3679668708  |
| H | -4.4762790822  | -2.33385867   | -0.8905919357 |
| H | -6.6507881779  | -2.9997574384 | -0.1593453325 |
| H | -8.1812724016  | -1.3696665195 | 0.5068766926  |
| H | -6.6020715664  | 0.943679068   | -0.2578146451 |
| H | -4.4701343524  | 1.400658308   | -0.1566785354 |
| H | -3.8342939861  | 1.0653564492  | -2.437252603  |
| H | -2.9185038127  | -0.3874149317 | -2.0223378655 |
| H | -5.8993587873  | -0.1924218734 | -2.5093414151 |
| H | -7.7970182557  | -1.9513390676 | -2.3782163352 |
| H | -8.6649384672  | 0.3511795577  | -0.9851460148 |
| H | -2.1344141639  | 0.9751854478  | 0.34682491    |
| H | -2.3721616664  | -0.774960919  | 0.2129473543  |
| H | -5.7962530126  | 0.9194407145  | 2.1041406543  |
| H | -6.520253849   | -0.6722518779 | 2.3195347302  |
| H | -5.3957254062  | -2.2171625577 | -3.459143956  |
| H | -3.9221339042  | -0.4769925479 | 1.914055702   |
| H | -7.9872224066  | 0.9200633318  | 3.2443164628  |
| H | -9.9563161415  | 3.2118391988  | 2.1897997783  |
| H | -10.9139898403 | 1.7465893405  | 2.016939634   |
| H | -9.8680528174  | 1.9527268452  | 3.4417062918  |

calc\_2b conf\_16

|   |               |               |               |
|---|---------------|---------------|---------------|
| C | -6.6697376016 | -2.0736884741 | -1.9458820629 |
| C | -7.8009213761 | -1.4103194651 | -1.16207246   |
| C | -7.0894279222 | -0.2630190416 | -0.405114541  |
| N | -5.7175359884 | -0.7596426616 | -0.18382695   |
| C | -5.5158419862 | -2.0156658    | -0.9455546505 |
| C | -4.6000090755 | 0.1500848395  | -0.4890385092 |
| C | -3.4449538667 | -0.8161576281 | -0.7294260123 |
| C | -4.0912686541 | -1.9480901413 | -1.5233673886 |
| O | -6.4581675686 | -1.2380035511 | -3.0789140917 |
| O | -8.8783508622 | -1.006883446  | -1.9509142021 |
| C | -4.3717170855 | 1.1012499992  | 0.688986464   |
| C | -7.8643871041 | 0.067323378   | 0.8710724843  |
| O | -3.401255145  | -3.1742248284 | -1.5268795296 |
| O | -4.543477751  | 0.4066356953  | 1.9093305331  |
| N | -7.3754522639 | 1.1940078506  | 1.6256353724  |
| O | -9.1442236488 | 2.5472113775  | 1.1661771947  |
| C | -8.0711059014 | 2.3617280347  | 1.7189603672  |
| C | -7.4173183805 | 3.4300928386  | 2.57162414    |
| H | -5.5942695317 | -2.8836676627 | -0.2748405296 |
| H | -6.9159527515 | -3.0945592682 | -2.2554445692 |
| H | -8.1942229164 | -2.1278198953 | -0.4318571502 |
| H | -7.0704251112 | 0.625247504   | -1.052267703  |
| H | -4.7961152998 | 0.7381447139  | -1.3993374181 |
| H | -2.6025842217 | -0.3551442334 | -1.2499906766 |
| H | -3.0836352242 | -1.1939548539 | 0.2364968889  |
| H | -4.1488484207 | -1.6522474419 | -2.5741080828 |
| H | -6.0913560639 | -1.7701212489 | -3.7939236853 |
| H | -8.4794162453 | -0.6195201096 | -2.7459763901 |

|   |               |               |              |
|---|---------------|---------------|--------------|
| H | -5.0751761417 | 1.9417514305  | 0.6272351553 |
| H | -3.357193646  | 1.5122330331  | 0.6527887037 |
| H | -7.8756052366 | -0.824279189  | 1.511952069  |
| H | -8.8950786302 | 0.3017292084  | 0.5917917239 |
| H | -3.2371650478 | -3.4227039461 | -0.607266655 |
| H | -5.0339729456 | -0.3979245465 | 1.6337312849 |
| H | -6.4863186224 | 1.0962321942  | 2.1024102175 |
| H | -7.2944274023 | 4.33327246    | 1.9691094249 |
| H | -8.0904330125 | 3.680853305   | 3.3952377336 |
| H | -6.4476513468 | 3.1368395702  | 2.9814635004 |

calc\_2b conf\_17

|   |                |               |               |
|---|----------------|---------------|---------------|
| C | -6.8973764431  | -1.8138260195 | -1.4150402913 |
| C | -7.5575143158  | -1.1394876066 | -0.2083102055 |
| C | -6.5651891263  | -0.0172253797 | 0.1383803186  |
| N | -5.2921746534  | -0.7143697121 | 0.0043168385  |
| C | -5.3997110454  | -1.6577980766 | -1.1284900132 |
| C | -4.0775117463  | 0.100845579   | -0.1691754151 |
| C | -3.397305375   | -0.4430296347 | -1.4375120445 |
| C | -4.5485099494  | -1.0297517167 | -2.237328164  |
| O | -7.2528217396  | -1.1272093695 | -2.5974827265 |
| O | -8.8460356872  | -0.7369294857 | -0.573416447  |
| C | -3.1671793241  | 0.0130476992  | 1.0547097801  |
| C | -6.7208187304  | 0.5773716635  | 1.5441361657  |
| O | -4.088187993   | -1.9382681912 | -3.2094098124 |
| O | -1.9992253316  | 0.7945110557  | 0.9149762484  |
| N | -7.6881697871  | 1.6572241228  | 1.6481924453  |
| O | -9.5293851777  | 0.3522555169  | 1.8195146814  |
| C | -9.0130056137  | 1.471000764   | 1.8175759018  |
| C | -9.8452977832  | 2.7153238167  | 2.0166943142  |
| H | -4.9520393416  | -2.6244331772 | -0.86381733   |
| H | -7.1913834564  | -2.8686561467 | -1.4934807069 |
| H | -7.5781644488  | -1.8466826868 | 0.6332799477  |
| H | -6.6877460916  | 0.7945566772  | -0.602034278  |
| H | -4.345893606   | 1.1572463048  | -0.3233983077 |
| H | -2.8430343802  | 0.3212254278  | -1.987294483  |
| H | -2.7030634506  | -1.2581949805 | -1.1901587351 |
| H | -5.1252704035  | -0.222086644  | -2.7024577046 |
| H | -8.1760641606  | -0.8562752072 | -2.4610881879 |
| H | -9.2937194524  | -0.4341718394 | 0.2425715794  |
| H | -2.9367462305  | -1.0458119095 | 1.2469093448  |
| H | -3.6768987619  | 0.3947653956  | 1.9433895505  |
| H | -5.7635342831  | 0.9906386763  | 1.868451366   |
| H | -6.9954012492  | -0.208254067  | 2.2539431357  |
| H | -4.8431632785  | -2.1365716966 | -3.7785583788 |
| H | -1.4634530706  | 0.3944545745  | 0.218640044   |
| H | -7.3410509583  | 2.6021967324  | 1.6222337388  |
| H | -9.2646910072  | 3.6405284508  | 2.028153953   |
| H | -10.5916958963 | 2.7715755537  | 1.2207616405  |
| H | -10.3855666501 | 2.6222655362  | 2.9616222371  |

calc\_2b conf\_18

|   |               |               |               |
|---|---------------|---------------|---------------|
| C | -6.5193844578 | -2.2452481528 | -1.4121000295 |
| C | -7.3246183735 | -1.6167199099 | -0.2613871435 |
| C | -6.5830381004 | -0.3017443675 | 0.0271216544  |
| N | -5.1894119617 | -0.73795884   | -0.0659525733 |
| C | -5.1203183037 | -1.6306653193 | -1.2350467282 |

|   |                |               |               |
|---|----------------|---------------|---------------|
| C | -4.1586648796  | 0.3111922895  | -0.254127092  |
| C | -3.6034360889  | 0.1311953597  | -1.6848604803 |
| C | -4.6728587557  | -0.7122896603 | -2.369543952  |
| O | -7.1580658465  | -1.8488063804 | -2.6137770908 |
| O | -8.6927277162  | -1.4784766662 | -0.5438618801 |
| C | -3.0888159445  | 0.1531581824  | 0.823886134   |
| C | -6.9410408259  | 0.3014459611  | 1.3793077037  |
| O | -4.2748391659  | -1.504183636  | -3.4733589404 |
| O | -3.6607124866  | 0.1298643426  | 2.1042286536  |
| N | -8.319059446   | 0.7307514374  | 1.3870874675  |
| O | -7.8946656941  | 2.821004362   | 2.1702795     |
| C | -8.6866927402  | 1.9875622633  | 1.7581292112  |
| C | -10.1678888164 | 2.2845600868  | 1.6412436143  |
| H | -4.3529978891  | -2.4014140367 | -1.0952324383 |
| H | -6.5000096774  | -3.3386835337 | -1.348490331  |
| H | -7.2380113755  | -2.2550525302 | 0.6245240128  |
| H | -6.8507500755  | 0.4308137261  | -0.7557881683 |
| H | -4.6289827049  | 1.2929625874  | -0.1302613222 |
| H | -3.4170470029  | 1.0861213419  | -2.1840756746 |
| H | -2.6627052849  | -0.4328372348 | -1.6681956233 |
| H | -5.515877777   | -0.0694616386 | -2.6552368457 |
| H | -6.5468434567  | -2.0293762424 | -3.3437136188 |
| H | -8.7468867583  | -1.3075938291 | -1.4982560661 |
| H | -2.3882624152  | 0.9930943107  | 0.7934114531  |
| H | -2.5144985621  | -0.7670331064 | 0.6234622277  |
| H | -6.3289954614  | 1.1753736223  | 1.6138275371  |
| H | -6.7601178281  | -0.4470598487 | 2.1643529884  |
| H | -3.9893913322  | -0.9150763743 | -4.1833009915 |
| H | -4.3435203652  | -0.557280372  | 2.0471905789  |
| H | -8.9937281007  | 0.1120090069  | 0.9588254651  |
| H | -10.7491597651 | 1.4723372485  | 1.197807057   |
| H | -10.5619934251 | 2.4966492601  | 2.6383536224  |
| H | -10.297981139  | 3.1888662905  | 1.0425281086  |

calc\_2b conf\_19

|   |                |               |               |
|---|----------------|---------------|---------------|
| C | -6.5376228404  | -2.3211741446 | -1.1438365085 |
| C | -7.2694671874  | -1.6569042886 | 0.0341846995  |
| C | -6.5813133782  | -0.2885605117 | 0.1591708615  |
| N | -5.1778032953  | -0.6622890648 | -0.0208163011 |
| C | -5.1531710417  | -1.6492876833 | -1.1128575473 |
| C | -4.2245021638  | 0.418608267   | -0.3760928268 |
| C | -3.7552238443  | 0.1396570168  | -1.8190586082 |
| C | -4.8111330626  | -0.8207991484 | -2.355729405  |
| O | -7.2917347873  | -2.0084068957 | -2.3016440822 |
| O | -8.6629934223  | -1.6112506865 | -0.1254150958 |
| C | -3.0785433337  | 0.4193738212  | 0.6334879937  |
| C | -6.8602040692  | 0.4011146427  | 1.4887171516  |
| O | -4.4860541083  | -1.5899165759 | -3.4936761819 |
| O | -3.5590292937  | 0.4734947384  | 1.9494520598  |
| N | -8.253907278   | 0.7631856983  | 1.5833231145  |
| O | -7.8793427664  | 2.9236449188  | 2.1782450979  |
| C | -8.6569734744  | 2.0252649416  | 1.8959354847  |
| C | -10.1564518594 | 2.2419550899  | 1.8857645611  |
| H | -4.3557950103  | -2.3879758561 | -0.9440737476 |
| H | -6.4734443324  | -3.4088593618 | -1.0267072392 |
| H | -7.0645895384  | -2.2241350785 | 0.9485493825  |
| H | -6.9515993499  | 0.3654419186  | -0.6507223171 |
| H | -4.7437759206  | 1.381096572   | -0.3092511346 |

|   |                |               |               |
|---|----------------|---------------|---------------|
| H | -3.6596429248  | 1.0455592711  | -2.4210835501 |
| H | -2.7746814538  | -0.3576446274 | -1.8113590642 |
| H | -5.697442076   | -0.2544794509 | -2.6509599932 |
| H | -6.7597479315  | -2.2313278577 | -3.0796437442 |
| H | -8.8136951432  | -1.4983924166 | -1.0781203783 |
| H | -2.4373330134  | 1.2929528875  | 0.4824937124  |
| H | -2.4594191738  | -0.4794216978 | 0.4695141717  |
| H | -6.2793423645  | 1.3190308197  | 1.6044255582  |
| H | -6.5750594428  | -0.2740883994 | 2.3087650729  |
| H | -3.6845042236  | -2.0933569827 | -3.2946942457 |
| H | -4.201809444   | -0.2518382703 | 1.9987339971  |
| H | -8.927313096   | 0.0802421432  | 1.264828284   |
| H | -10.72829391   | 1.3684705144  | 1.5629184884  |
| H | -10.4765210311 | 2.5209479494  | 2.8927923133  |
| H | -10.3845194134 | 3.0840677878  | 1.2284399662  |

calc\_2b conf\_20

|   |               |               |               |
|---|---------------|---------------|---------------|
| C | -6.3794813935 | -2.6002444532 | -0.8847284408 |
| C | -7.6003725815 | -1.6779146461 | -0.6965787158 |
| C | -7.0509610335 | -0.4304220964 | 0.0189739061  |
| N | -5.5799448365 | -0.5087785866 | -0.0670944005 |
| C | -5.2007675101 | -1.6328828967 | -0.9169304073 |
| C | -4.8357453524 | 0.6678956483  | -0.5502851016 |
| C | -4.1876700278 | 0.2618280276  | -1.8990533083 |
| C | -4.902720711  | -1.0233615309 | -2.2909371357 |
| O | -6.4676595955 | -3.4009226116 | -2.0419108641 |
| O | -8.0870448375 | -1.3982623173 | -2.0055771783 |
| C | -3.7518078179 | 1.1017542243  | 0.4249346208  |
| C | -7.5234006635 | -0.3497052436 | 1.4723685877  |
| O | -4.1028376877 | -1.8424653417 | -3.1068871344 |
| O | -4.335602489  | 1.6555412921  | 1.5951955491  |
| N | -7.0903252461 | 0.8660182328  | 2.1092431712  |
| O | -9.1806296387 | 1.7514554067  | 2.2717248065  |
| C | -7.9691899991 | 1.8605606238  | 2.4088263153  |
| C | -7.3364387525 | 3.1141002032  | 2.9781299101  |
| H | -4.2788352342 | -2.1135995906 | -0.5615453369 |
| H | -6.2975600231 | -3.2638412618 | -0.0178088596 |
| H | -8.3880247909 | -2.1687260567 | -0.1122966248 |
| H | -7.426230373  | 0.4607561472  | -0.5040014159 |
| H | -5.5295180928 | 1.5075702885  | -0.6782371302 |
| H | -4.2622665752 | 1.0476604373  | -2.6538322264 |
| H | -3.1238311484 | 0.0274589958  | -1.767777415  |
| H | -5.8522187314 | -0.7786040622 | -2.7883540953 |
| H | -7.146803885  | -2.9719710592 | -2.590998037  |
| H | -8.9738736613 | -1.0256729653 | -1.9339347564 |
| H | -3.1088936377 | 1.8477380675  | -0.0643913076 |
| H | -3.1347040205 | 0.2276603563  | 0.6725995502  |
| H | -7.1441413039 | -1.2200065667 | 2.0227629754  |
| H | -8.6155347942 | -0.3543384596 | 1.520842375   |
| H | -4.5940113503 | -2.6750049876 | -3.1813291518 |
| H | -3.6459955488 | 1.7543117874  | 2.2620621893  |
| H | -6.0935227992 | 1.063718807   | 2.1036894342  |
| H | -7.3959795881 | 3.0831806866  | 4.0705664745  |
| H | -6.2893983978 | 3.2276510293  | 2.6873932983  |
| H | -7.9090558706 | 3.9788644722  | 2.6401758803  |

calc\_2b conf\_21

|   |                |               |               |
|---|----------------|---------------|---------------|
| C | -6.8706444466  | -1.7248768251 | -0.912581398  |
| C | -7.4262068504  | -0.2911688396 | -0.814738339  |
| C | -6.34231908    | 0.4639527449  | -0.0356811506 |
| N | -5.1224715855  | -0.369880122  | -0.0849940288 |
| C | -5.3611248419  | -1.5403942838 | -0.9261981074 |
| C | -3.8691574193  | 0.2640230836  | -0.5488353984 |
| C | -3.4806594784  | -0.4363243751 | -1.8676987246 |
| C | -4.7322549568  | -1.1996537071 | -2.2876667423 |
| O | -7.2932174505  | -2.3797185678 | -2.1060849646 |
| O | -7.552289813   | 0.2701753662  | -2.1060235496 |
| C | -2.7995286173  | 0.117398459   | 0.5354037977  |
| C | -6.7104249603  | 0.7357890822  | 1.4283807106  |
| O | -4.4067481983  | -2.3312021848 | -3.0589861322 |
| O | -3.2902322626  | 0.5081947542  | 1.794244286   |
| N | -7.8682472177  | 1.584726563   | 1.5994114682  |
| O | -9.3261847218  | -0.1088730976 | 1.9830512484  |
| C | -9.1011118425  | 1.090616046   | 1.8947619344  |
| C | -10.186061469  | 2.1226504414  | 2.1143519931  |
| H | -4.8449732146  | -2.4279335242 | -0.5371482486 |
| H | -7.1746638272  | -2.2998179976 | -0.0313286827 |
| H | -8.3897946251  | -0.2715058208 | -0.2932018971 |
| H | -6.1822014467  | 1.4235653708  | -0.544388025  |
| H | -4.0579218615  | 1.3330696431  | -0.7005440607 |
| H | -3.1383658986  | 0.2633828507  | -2.6329779363 |
| H | -2.6785220586  | -1.1653761272 | -1.7009575632 |
| H | -5.4058043996  | -0.5281527348 | -2.8338375474 |
| H | -8.1038601451  | -2.868087256  | -1.9176292767 |
| H | -7.7648983955  | -0.4769617934 | -2.6891710608 |
| H | -1.9357565319  | 0.7494416135  | 0.3087537806  |
| H | -2.4494360133  | -0.9273397443 | 0.5571578566  |
| H | -5.8509778466  | 1.2027710543  | 1.9189118664  |
| H | -6.9247099344  | -0.2072244599 | 1.9368132912  |
| H | -5.2486026777  | -2.7666429181 | -3.2522281555 |
| H | -4.0933183405  | -0.0275785633 | 1.8974641352  |
| H | -7.7491946582  | 2.5819200755  | 1.5264607781  |
| H | -9.858347648   | 3.153536683   | 1.9592698709  |
| H | -11.0166419829 | 1.9076804309  | 1.4384631917  |
| H | -10.5631232821 | 2.0208186798  | 3.1350007805  |

calc\_2b conf\_22

|   |                |               |               |
|---|----------------|---------------|---------------|
| C | -6.5032116316  | -2.2800054016 | -1.3684617081 |
| C | -7.3503508264  | -1.5923495516 | -0.2722166264 |
| C | -6.5894387489  | -0.2959449513 | 0.0320191442  |
| N | -5.2014731115  | -0.7446006439 | -0.0509705228 |
| C | -5.1225352319  | -1.6345630377 | -1.2229468285 |
| C | -4.1734096545  | 0.3091559054  | -0.242980208  |
| C | -3.6450182422  | 0.1552741651  | -1.6834385473 |
| C | -4.6863838117  | -0.7133807731 | -2.3739678753 |
| O | -7.0349312952  | -1.9959045234 | -2.66269525   |
| O | -8.6973452509  | -1.4176448643 | -0.6443561515 |
| C | -3.0905736323  | 0.1348181037  | 0.8189738727  |
| C | -6.9488511985  | 0.3080536055  | 1.3844777547  |
| O | -4.1546491673  | -1.3924365086 | -3.4827238604 |
| O | -3.6487874712  | 0.0857670232  | 2.1060683457  |
| N | -8.3210483932  | 0.7557716199  | 1.3937765448  |
| O | -7.8662125665  | 2.8544231442  | 2.1361416823  |
| C | -8.6720226888  | 2.0232928203  | 1.7493075529  |
| C | -10.1515613091 | 2.3333158264  | 1.6468725064  |

|   |                |               |               |
|---|----------------|---------------|---------------|
| H | -4.3374808706  | -2.386941056  | -1.084630703  |
| H | -6.4649863824  | -3.3641475057 | -1.2242846513 |
| H | -7.3571618902  | -2.2162139905 | 0.6266827474  |
| H | -6.8387726754  | 0.4483414306  | -0.7481867167 |
| H | -4.6444797711  | 1.2866343949  | -0.0918766366 |
| H | -3.4940768747  | 1.1131743046  | -2.1853313442 |
| H | -2.6881162354  | -0.3807761071 | -1.6936172603 |
| H | -5.53811424    | -0.0910213445 | -2.6783857793 |
| H | -7.73516152    | -2.6399281517 | -2.8295721546 |
| H | -8.6687191945  | -0.992796808  | -1.5157243833 |
| H | -2.3934768912  | 0.9775914518  | 0.7952811168  |
| H | -2.514807927   | -0.7790816856 | 0.5960258394  |
| H | -6.3266169833  | 1.1738474311  | 1.6211868796  |
| H | -6.7771912456  | -0.4440550623 | 2.1675760434  |
| H | -4.9064677946  | -1.8277960641 | -3.9071874798 |
| H | -4.3350316731  | -0.5970147041 | 2.0373125808  |
| H | -9.0133786009  | 0.1360676714  | 0.9985782918  |
| H | -10.5302312179 | 2.5654733114  | 2.6454422453  |
| H | -10.2803728667 | 3.2291943256  | 1.0354356544  |
| H | -10.7475509143 | 1.5204062002  | 1.2243958846  |

calc\_2b conf\_23

|   |               |               |               |
|---|---------------|---------------|---------------|
| C | -7.110479108  | -1.6175104069 | -0.6852964058 |
| C | -7.6806549415 | -0.2923643254 | -1.2283825977 |
| C | -6.6760279708 | 0.7754059218  | -0.7595747616 |
| N | -5.5031085986 | 0.0492539702  | -0.2447633925 |
| C | -5.6153864679 | -1.366532706  | -0.5794804163 |
| C | -4.1710312822 | 0.5057906493  | -0.6944728682 |
| C | -3.6046032974 | -0.6122811679 | -1.5956937732 |
| C | -4.7923080351 | -1.535289694  | -1.8660100482 |
| O | -7.3581876171 | -2.7072888862 | -1.5733173893 |
| O | -7.6834885151 | -0.3144143729 | -2.6441164481 |
| C | -3.3233775988 | 0.7922658318  | 0.554018119   |
| C | -7.2007505581 | 1.8355908909  | 0.2331283091  |
| O | -4.3674832754 | -2.8564932821 | -2.1007737886 |
| O | -4.1067358481 | 1.4559042167  | 1.5158025504  |
| N | -7.1825519443 | 1.4917141709  | 1.6413543782  |
| O | -8.8254690331 | -0.0647026992 | 1.5660368509  |
| C | -8.0219269047 | 0.594688306   | 2.214090979   |
| C | -7.9093547494 | 0.4565402428  | 3.7174959303  |
| H | -5.1550758455 | -1.9962500719 | 0.1934268079  |
| H | -7.537559593  | -1.8151108822 | 0.3006359247  |
| H | -8.6867622372 | -0.1014118297 | -0.8428418419 |
| H | -6.4190939282 | 1.3385470238  | -1.6676637822 |
| H | -4.2986798386 | 1.4440497366  | -1.2460058414 |
| H | -3.1543102705 | -0.2293785883 | -2.5139069605 |
| H | -2.8387811179 | -1.1922412176 | -1.0670944533 |
| H | -5.3749665607 | -1.1510283324 | -2.7132626487 |
| H | -8.1670464809 | -3.1509380685 | -1.2909052917 |
| H | -7.7988989921 | -1.2495227159 | -2.8817572758 |
| H | -2.4658632179 | 1.4262012743  | 0.3098837466  |
| H | -2.9314599131 | -0.1573357204 | 0.9541727286  |
| H | -8.2165522764 | 2.1185683191  | -0.0649709696 |
| H | -6.5716001227 | 2.7238312173  | 0.1421080731  |
| H | -5.1768325918 | -3.372916961  | -2.2201951872 |
| H | -4.9326855274 | 0.9323314928  | 1.4834353282  |
| H | -6.5758884559 | 2.0317196823  | 2.2377757141  |
| H | -7.0987693051 | 1.0416058622  | 4.1581335226  |

|   |               |               |              |
|---|---------------|---------------|--------------|
| H | -8.8557554209 | 0.7642654697  | 4.1695381973 |
| H | -7.7604925585 | -0.5972623498 | 3.9624489819 |

calc\_2b conf\_24

|   |               |               |               |
|---|---------------|---------------|---------------|
| C | -6.6444574678 | -2.184341141  | -1.5439792899 |
| C | -7.7928595229 | -1.1185926758 | -1.4549436698 |
| C | -7.3553356382 | -0.1617549613 | -0.3157641831 |
| N | -5.9426902933 | -0.4177609088 | -0.0656946333 |
| C | -5.7566591962 | -1.8507396361 | -0.33097286   |
| C | -5.0211422642 | 0.287580397   | -0.9839211187 |
| C | -3.7975846082 | -0.6373112487 | -1.0594031117 |
| C | -4.2428899206 | -1.9986582863 | -0.4864316395 |
| O | -5.9317006264 | -2.0470110343 | -2.7470612587 |
| O | -7.9711114456 | -0.4793417766 | -2.7120528839 |
| C | -4.7097950079 | 1.7055582195  | -0.5238291728 |
| C | -8.2094961868 | -0.4101778553 | 0.9423620856  |
| O | -3.635236822  | -2.2804181905 | 0.7633866897  |
| O | -5.7865411953 | 2.5958040036  | -0.703537772  |
| N | -7.6466964902 | 0.1091651217  | 2.1708914593  |
| O | -7.5528050665 | 2.2580502278  | 1.4806799047  |
| C | -7.3141297762 | 1.4064011284  | 2.3357093169  |
| C | -6.6406337932 | 1.7639015378  | 3.6403802555  |
| H | -6.0913547113 | -2.4444337333 | 0.5290134776  |
| H | -7.0516408249 | -3.2025030179 | -1.4681548209 |
| H | -8.7477565978 | -1.6044467593 | -1.227923814  |
| H | -7.4886439553 | 0.8811861311  | -0.6059830586 |
| H | -5.4572319267 | 0.3700045766  | -1.9904684662 |
| H | -3.4491321485 | -0.7294912364 | -2.0891319789 |
| H | -2.961877657  | -0.2628374861 | -0.457386619  |
| H | -3.9771819182 | -2.8304550254 | -1.1388352875 |
| H | -6.5287609583 | -1.5477445166 | -3.3345378499 |
| H | -7.5811836235 | 0.4030331147  | -2.6631745497 |
| H | -3.877710357  | 2.0879738174  | -1.126618764  |
| H | -4.3710758003 | 1.6737124163  | 0.5228812824  |
| H | -8.3571844808 | -1.4823201379 | 1.0997726838  |
| H | -9.1986939395 | 0.029945397   | 0.7780981128  |
| H | -3.8839912593 | -1.5521111049 | 1.3495889664  |
| H | -6.3551753718 | 2.5694336504  | 0.0867969677  |
| H | -7.3118668615 | -0.5539209268 | 2.8499126183  |
| H | -5.6168630144 | 2.0866238198  | 3.4328119476  |
| H | -7.1658617496 | 2.6135602514  | 4.0810030993  |
| H | -6.6140475228 | 0.9454378489  | 4.3635179347  |



**Table S38.** Sampled and DFT geometry optimized conformers related to calc\_2c, with energy values (Hartree) and related % contribution on the final Boltzmann distribution for the three employed functional/basis set combinations.

| Conformer       | MPW1PW91/6-31g(d,p) |                                              | MPW1PW91/6-311+g(d,p) |                                              | B97-2/cc-pVTZ    |                                              |
|-----------------|---------------------|----------------------------------------------|-----------------------|----------------------------------------------|------------------|----------------------------------------------|
|                 | Energy (Hartree)    | % contribution on the Boltzmann distribution | Energy (Hartree)      | % contribution on the Boltzmann distribution | Energy (Hartree) | % contribution on the Boltzmann distribution |
| calc_2c conf_1  | -916.6593144        | 93.88%                                       | -916.8940084          | 88.54%                                       | -916.8411975     | 73.40%                                       |
| calc_2c conf_2  | -916.6561823        | 3.40%                                        | -916.8918926          | 9.42%                                        | -916.8399559     | 19.71%                                       |
| calc_2c conf_3  | -916.6553274        | 1.38%                                        | -916.8898102          | 1.04%                                        | -916.8382855     | 3.36%                                        |
| calc_2c conf_4  | -916.6552247        | 1.23%                                        | -916.8894586          | 0.71%                                        | -916.8381521     | 2.92%                                        |
| calc_2c conf_5  | -916.6523443        | 0.06%                                        | -916.8866502          | 0.04%                                        | -916.8339035     | 0.03%                                        |
| calc_2c conf_6  | -916.6511297        | 0.02%                                        | -916.8883109          | 0.21%                                        | -916.8362275     | 0.38%                                        |
| calc_2c conf_7  | -916.6510022        | 0.01%                                        | -916.8856609          | 0.01%                                        | -916.8346381     | 0.07%                                        |
| calc_2c conf_8  | -916.6507502        | 0.01%                                        | -916.8850608          | 0.01%                                        | -916.8344792     | 0.06%                                        |
| calc_2c conf_9  | -916.6496278        | 0.00%                                        | -916.8839994          | 0.00%                                        | -916.8329005     | 0.01%                                        |
| calc_2c conf_10 | -916.6487700        | 0.00%                                        | -916.8857021          | 0.01%                                        | -916.8337733     | 0.03%                                        |
| calc_2c conf_11 | -916.6487010        | 0.00%                                        | -916.8832926          | 0.00%                                        | -916.8332605     | 0.02%                                        |
| calc_2c conf_12 | -916.6468637        | 0.00%                                        | -916.8815696          | 0.00%                                        | -916.8310224     | 0.00%                                        |
| calc_2c conf_13 | -916.6457891        | 0.00%                                        | -916.8846577          | 0.00%                                        | -916.8328106     | 0.01%                                        |
| calc_2c conf_14 | -916.6445246        | 0.00%                                        | -916.8827466          | 0.00%                                        | -916.8317578     | 0.00%                                        |
| calc_2c conf_15 | -916.6441171        | 0.00%                                        | -916.8810170          | 0.00%                                        | -916.8291855     | 0.00%                                        |
| calc_2c conf_16 | -916.6436037        | 0.00%                                        | -916.8797328          | 0.00%                                        | -916.8289386     | 0.00%                                        |
| calc_2c conf_17 | -916.6434575        | 0.00%                                        | -916.8820410          | 0.00%                                        | -916.8310253     | 0.00%                                        |
| calc_2c conf_18 | -916.6429565        | 0.00%                                        | -916.8777842          | 0.00%                                        | -916.8273620     | 0.00%                                        |
| calc_2c conf_19 | -916.6428849        | 0.00%                                        | -916.8786364          | 0.00%                                        | -916.8278920     | 0.00%                                        |
| calc_2c conf_20 | -916.6425687        | 0.00%                                        | -916.8787206          | 0.00%                                        | -916.8274909     | 0.00%                                        |
| calc_2c conf_21 | -916.6424392        | 0.00%                                        | -916.8778239          | 0.00%                                        | -916.8258961     | 0.00%                                        |
| calc_2c conf_22 | -916.6423425        | 0.00%                                        | -916.8785005          | 0.00%                                        | -916.8281990     | 0.00%                                        |
| calc_2c conf_23 | -916.6422630        | 0.00%                                        | -916.8760118          | 0.00%                                        | -916.8255323     | 0.00%                                        |
| calc_2c conf_24 | -916.6422249        | 0.00%                                        | -916.8773204          | 0.00%                                        | -916.8270534     | 0.00%                                        |
| calc_2c conf_25 | -916.6421984        | 0.00%                                        | -916.8772600          | 0.00%                                        | -916.8268987     | 0.00%                                        |
| calc_2c conf_26 | -916.6421715        | 0.00%                                        | -916.8781638          | 0.00%                                        | -916.8280307     | 0.00%                                        |
| calc_2c conf_27 | -916.6420646        | 0.00%                                        | -916.8772723          | 0.00%                                        | -916.8268253     | 0.00%                                        |
| calc_2c conf_28 | -916.6419182        | 0.00%                                        | -916.8790238          | 0.00%                                        | -916.8283886     | 0.00%                                        |

|                 |              |       |              |       |              |       |
|-----------------|--------------|-------|--------------|-------|--------------|-------|
| calc_2e conf_29 | -916.6414649 | 0.00% | -916.8763347 | 0.00% | -916.8263286 | 0.00% |
| calc_2e conf_30 | -916.6413011 | 0.00% | -916.8762497 | 0.00% | -916.8250859 | 0.00% |
| calc_2e conf_31 | -916.6409741 | 0.00% | -916.8755981 | 0.00% | -916.8241265 | 0.00% |
| calc_2e conf_32 | -916.6408285 | 0.00% | -916.8778290 | 0.00% | -916.8273658 | 0.00% |
| calc_2e conf_33 | -916.6407598 | 0.00% | -916.8769028 | 0.00% | -916.8266625 | 0.00% |
| calc_2e conf_34 | -916.6401777 | 0.00% | -916.8778566 | 0.00% | -916.8273923 | 0.00% |
| calc_2e conf_35 | -916.6401356 | 0.00% | -916.8744093 | 0.00% | -916.8230158 | 0.00% |
| calc_2e conf_36 | -916.6398480 | 0.00% | -916.8748831 | 0.00% | -916.8243886 | 0.00% |
| calc_2e conf_37 | -916.6397383 | 0.00% | -916.8757712 | 0.00% | -916.8254365 | 0.00% |
| calc_2e conf_38 | -916.6396444 | 0.00% | -916.8767428 | 0.00% | -916.8261981 | 0.00% |
| calc_2e conf_39 | -916.6392437 | 0.00% | -916.8793164 | 0.00% | -916.8282140 | 0.00% |
| calc_2e conf_40 | -916.6392215 | 0.00% | -916.8762287 | 0.00% | -916.8262948 | 0.00% |
| calc_2e conf_41 | -916.6387064 | 0.00% | -916.8780046 | 0.00% | -916.8274347 | 0.00% |
| calc_2e conf_42 | -916.6386646 | 0.00% | -916.8756762 | 0.00% | -916.8253078 | 0.00% |
| calc_2e conf_43 | -916.6382805 | 0.00% | -916.8747320 | 0.00% | -916.8248691 | 0.00% |
| calc_2e conf_44 | -916.6374710 | 0.00% | -916.8750000 | 0.00% | -916.8236343 | 0.00% |
| calc_2e conf_45 | -916.6373683 | 0.00% | -916.8729987 | 0.00% | -916.8230565 | 0.00% |
| calc_2e conf_46 | -916.6368994 | 0.00% | -916.8726268 | 0.00% | -916.8215026 | 0.00% |
| calc_2e conf_47 | -916.6364445 | 0.00% | -916.8725305 | 0.00% | -916.8229899 | 0.00% |
| calc_2e conf_48 | -916.6363982 | 0.00% | -916.8750007 | 0.00% | -916.8236258 | 0.00% |
| calc_2e conf_49 | -916.6348422 | 0.00% | -916.8716995 | 0.00% | -916.8210615 | 0.00% |
| calc_2e conf_50 | -916.6347653 | 0.00% | -916.8732921 | 0.00% | -916.8227527 | 0.00% |
| calc_2e conf_51 | -916.6329818 | 0.00% | -916.8725001 | 0.00% | -916.8220643 | 0.00% |
| calc_2e conf_52 | -916.6306019 | 0.00% | -916.8703707 | 0.00% | -916.8204293 | 0.00% |

**Table S39.** Cartesian coordinates of the optimized geometries for the conformers related to calc\_2c. The related energies and % contribution on the final Boltzmann distribution for the three employed functional/basis set combinations are reported in Table S38.

calc\_2c conf\_1

|   |               |               |               |
|---|---------------|---------------|---------------|
| C | -6.8736049234 | -2.3148339446 | -4.1837253314 |
| C | -8.0757480558 | -1.9796885431 | -3.2814986425 |
| C | -8.190143612  | -3.2301994749 | -2.3993650546 |
| N | -8.0247543195 | -4.2884271867 | -3.3833464889 |
| C | -6.9897673352 | -3.8416360554 | -4.3431241493 |
| C | -7.7611583704 | -5.6992180736 | -3.0309292397 |
| C | -6.455190287  | -6.0594485708 | -3.7924294181 |
| C | -5.770681964  | -4.7193089385 | -4.0199086973 |
| O | -5.6998886066 | -1.8453259514 | -3.5510546216 |
| O | -7.8915021957 | -0.7857121277 | -2.5736938295 |
| C | -7.6657274605 | -6.0556036914 | -1.5468125968 |
| C | -9.503476252  | -3.25968671   | -1.6178102405 |
| O | -5.077914424  | -4.2903146342 | -2.8543984408 |
| O | -6.6206345504 | -5.3765095523 | -0.8716686891 |
| N | -9.4298184646 | -2.3751636908 | -0.4695926922 |
| O | -8.2779043008 | -3.8756751952 | 0.7843221316  |
| C | -8.7411927982 | -2.741802114  | 0.6338883656  |
| C | -8.5916844641 | -1.694506271  | 1.7096425452  |
| H | -7.30850659   | -4.0806830652 | -5.3675563628 |
| H | -6.9394893521 | -1.8030930557 | -5.148106047  |
| H | -8.9885357742 | -1.8903336579 | -3.8826456665 |
| H | -7.3724835236 | -3.1877027572 | -1.6639354509 |
| H | -8.5799048134 | -6.3209946135 | -3.4210584089 |
| H | -6.6915622235 | -6.5205945177 | -4.7560172733 |
| H | -5.8153456349 | -6.7508310333 | -3.2372583721 |
| H | -5.0399144243 | -4.7401375829 | -4.8323353752 |
| H | -5.2859795765 | -2.6151897148 | -3.0994390807 |
| H | -6.9191197143 | -0.7165804525 | -2.5050440189 |
| H | -7.4769089273 | -7.135360732  | -1.4908795786 |
| H | -8.6106513084 | -5.8753183863 | -1.029428366  |
| H | -10.336216103 | -2.9425174877 | -2.2518454058 |
| H | -9.7385151673 | -4.2562731906 | -1.246240565  |
| H | -5.5496234312 | -4.6419091476 | -2.0620111652 |
| H | -7.0492278493 | -4.7928709975 | -0.2124764999 |
| H | -9.5254658639 | -1.3869793366 | -0.6533718704 |
| H | -9.1092737222 | -0.7598832099 | 1.4845825177  |
| H | -8.9779995757 | -2.1011884061 | 2.6469243632  |
| H | -7.5284840407 | -1.4894979295 | 1.8586477163  |

calc\_2c conf\_2

|   |               |               |               |
|---|---------------|---------------|---------------|
| C | -6.6615626247 | -2.4177208805 | -3.8469617348 |
| C | -7.7869842054 | -2.1179710375 | -2.8491860751 |
| C | -8.0074381884 | -3.4643641146 | -2.1334346733 |
| N | -7.8660398941 | -4.4012607085 | -3.2354556211 |
| C | -6.946328571  | -3.8691123963 | -4.25126095   |
| C | -7.6243864916 | -5.833053238  | -3.0236081316 |
| C | -6.5827508483 | -6.1887182062 | -4.1138315938 |
| C | -5.8080013813 | -4.8977559239 | -4.3499462165 |
| O | -5.4131241098 | -2.2551023349 | -3.1898771438 |
| O | -7.3682233932 | -1.0595921069 | -2.0368620115 |
| C | -7.2070935217 | -6.2534341728 | -1.6072569973 |
| C | -9.389985811  | -3.5873189563 | -1.4583106875 |

|   |                |               |               |
|---|----------------|---------------|---------------|
| O | -4.8297510425  | -4.7865984028 | -3.3302963895 |
| O | -6.0796282003  | -5.6187499325 | -1.0775978645 |
| N | -9.3754177649  | -3.3780793508 | -0.0220789377 |
| O | -9.2785639815  | -1.1193327946 | -0.1177791882 |
| C | -9.3134818938  | -2.157817928  | 0.5464368395  |
| C | -9.3084715099  | -2.1160060869 | 2.0549739907  |
| H | -7.442808665   | -3.857314269  | -5.2342567872 |
| H | -6.6916188295  | -1.7435547814 | -4.7103167895 |
| H | -8.700677055   | -1.8640981769 | -3.4073059702 |
| H | -7.2327803519  | -3.5939934244 | -1.3623961145 |
| H | -8.5454972225  | -6.4016448496 | -3.2261231843 |
| H | -7.0914296315  | -6.4871236786 | -5.0359413787 |
| H | -5.917028568   | -7.0040615052 | -3.8179867959 |
| H | -5.322933716   | -4.8722575888 | -5.3338001085 |
| H | -5.5997054502  | -1.6448622095 | -2.4505986811 |
| H | -8.0388911339  | -0.9413149697 | -1.3282733647 |
| H | -7.0857255709  | -7.3508704333 | -1.6318942172 |
| H | -8.0383976207  | -6.0612724759 | -0.9154469179 |
| H | -10.0973158739 | -2.8773116061 | -1.8970996967 |
| H | -9.7902841087  | -4.5879145692 | -1.6317851489 |
| H | -4.7265516445  | -3.8281073963 | -3.1495295389 |
| H | -5.4740091105  | -5.4149873476 | -1.8227566018 |
| H | -9.2940619176  | -4.1866077821 | 0.5733816936  |
| H | -8.3754652822  | -1.6572614286 | 2.3914850759  |
| H | -10.1255243044 | -1.4716812266 | 2.3869615877  |
| H | -9.4130605098  | -3.096771709  | 2.5240163248  |

calc\_2c conf\_3

|   |                |               |               |
|---|----------------|---------------|---------------|
| C | -6.4171740365  | -2.5713102188 | -3.8546736011 |
| C | -7.3414695056  | -1.9677100613 | -2.7971445632 |
| C | -7.8724773911  | -3.2143941952 | -2.0563197843 |
| N | -7.9794591984  | -4.199324267  | -3.1148684624 |
| C | -7.2444422302  | -3.7696978872 | -4.3158569461 |
| C | -7.8304982262  | -5.6314769017 | -2.8742965    |
| C | -7.4047617742  | -6.1469680963 | -4.2619624979 |
| C | -6.5517837223  | -5.0306052315 | -4.8778894398 |
| O | -5.2314704002  | -2.9344040315 | -3.1601259803 |
| O | -6.7203150225  | -1.0227228231 | -1.9633344374 |
| C | -6.8633713729  | -6.0013254896 | -1.744910966  |
| C | -9.1895672477  | -2.9640946864 | -1.3272079231 |
| O | -5.1705676468  | -5.1568909246 | -4.5651638915 |
| O | -5.5330650574  | -5.5480155265 | -1.9456042685 |
| N | -9.0036622484  | -2.0035906325 | -0.2640172949 |
| O | -10.1841578334 | -3.1727125029 | 1.2827113614  |
| C | -9.4983898726  | -2.2053688559 | 0.9874143921  |
| C | -9.1490207227  | -1.1353117166 | 2.0009637516  |
| H | -7.9520082131  | -3.4075015795 | -5.0789659192 |
| H | -6.1839060666  | -1.8705219622 | -4.6649921198 |
| H | -8.1740758551  | -1.4544719709 | -3.2907907067 |
| H | -7.124479443   | -3.4768761505 | -1.2868999652 |
| H | -8.7976747085  | -6.0741542524 | -2.5951783522 |
| H | -8.2986717538  | -6.2932927533 | -4.8756182223 |
| H | -6.8637593916  | -7.0968175256 | -4.2286089379 |
| H | -6.6024070395  | -5.0366478459 | -5.9688614462 |
| H | -4.7774234529  | -3.5682702631 | -3.7547726985 |
| H | -5.835688226   | -1.3763671382 | -1.7791276505 |
| H | -6.8069732938  | -7.0903223685 | -1.6658119686 |
| H | -7.2460193334  | -5.6306483114 | -0.7853513076 |

|   |                |               |               |
|---|----------------|---------------|---------------|
| H | -9.9421489928  | -2.6241904457 | -2.0514286698 |
| H | -9.5716790181  | -3.8781247405 | -0.8659384647 |
| H | -5.122478791   | -5.5665205783 | -3.6721152326 |
| H | -5.5362808814  | -4.5726952781 | -1.9718661142 |
| H | -8.3703122835  | -1.2358129512 | -0.4388120126 |
| H | -10.0743121811 | -0.6822830508 | 2.3653006175  |
| H | -8.6615401525  | -1.6083772656 | 2.856592208   |
| H | -8.500507413   | -0.3481795197 | 1.6085340148  |

calc\_2c conf\_4

|   |               |               |               |
|---|---------------|---------------|---------------|
| C | -6.727583951  | -2.4814269701 | -3.9696822434 |
| C | -7.8267375142 | -1.9397592954 | -3.0531785659 |
| C | -8.1711603647 | -3.1685744001 | -2.1875653217 |
| N | -8.0378437597 | -4.2715700928 | -3.1182549064 |
| C | -7.2855291847 | -3.8615109558 | -4.3160482416 |
| C | -7.659398608  | -5.6127429175 | -2.6774352421 |
| C | -7.0274891003 | -6.2034759196 | -3.9519222941 |
| C | -6.3340484302 | -5.0303464966 | -4.6562699263 |
| O | -5.5554203207 | -2.5283563148 | -3.1682011646 |
| O | -7.4574989378 | -0.7998889843 | -2.3240412841 |
| C | -6.750568236  | -5.6584507914 | -1.4448263127 |
| C | -9.549041133  | -3.1025004804 | -1.5273332808 |
| O | -4.9852284111 | -4.8599081587 | -4.2398420132 |
| O | -5.4992403403 | -5.0059981602 | -1.6253608684 |
| N | -9.5773950642 | -2.1589162234 | -0.4317346773 |
| O | -9.1123720865 | -3.7437874779 | 1.1283228835  |
| C | -9.2685526501 | -2.5669618432 | 0.8328107557  |
| C | -9.159601544  | -1.4654229908 | 1.8646922106  |
| H | -7.9754025622 | -3.7345120077 | -5.1658849659 |
| H | -6.5607540931 | -1.8511391374 | -4.8515875392 |
| H | -8.6985298519 | -1.6618042088 | -3.6565142035 |
| H | -7.4380036266 | -3.2026667994 | -1.3633115649 |
| H | -8.5551599987 | -6.1903191524 | -2.4067100039 |
| H | -7.8221310338 | -6.5886803237 | -4.5980581611 |
| H | -6.3313140471 | -7.0233758779 | -3.7540736672 |
| H | -6.2859803333 | -5.1777018734 | -5.7375359577 |
| H | -4.9564147461 | -3.1470140666 | -3.6373799492 |
| H | -6.5406328535 | -0.9539868027 | -2.0471407587 |
| H | -6.5178742146 | -6.7016277089 | -1.2143289303 |
| H | -7.2720695004 | -5.2432846266 | -0.5735892357 |
| H | -10.312244986 | -2.8386092587 | -2.2670495892 |
| H | -9.8065360064 | -4.0763335602 | -1.1074241191 |
| H | -4.9477148891 | -5.140477452  | -3.2967211464 |
| H | -5.6624888044 | -4.0542794372 | -1.7583447168 |
| H | -9.441438475  | -1.1852180896 | -0.6598585053 |
| H | -9.3881933072 | -0.4712986424 | 1.4735533421  |
| H | -9.8425220484 | -1.690057113  | 2.6870110904  |
| H | -8.1468849855 | -1.4640153884 | 2.2758190747  |

calc\_2c conf\_5

|   |               |               |               |
|---|---------------|---------------|---------------|
| C | -7.2014432377 | -2.3144769854 | -4.3652207606 |
| C | -7.4757635893 | -1.9542237828 | -2.8875337085 |
| C | -8.0850199733 | -3.2357690556 | -2.2790763789 |
| N | -8.0479861437 | -4.262892433  | -3.3355896027 |
| C | -7.0783658451 | -3.8365828716 | -4.3456989877 |
| C | -7.7063338365 | -5.6662701518 | -3.0037095268 |
| C | -6.3094531717 | -5.9233142949 | -3.6513585756 |

|   |                |               |               |
|---|----------------|---------------|---------------|
| C | -5.7711775291  | -4.5210835566 | -3.9157551686 |
| O | -6.1002683798  | -1.6291648557 | -4.8871965076 |
| O | -6.2766122128  | -1.5492446564 | -2.2618367545 |
| C | -7.7298968413  | -6.0520956591 | -1.5292524786 |
| C | -9.507849986   | -3.0628479267 | -1.7428920204 |
| O | -5.2195575532  | -3.9815303963 | -2.7137518143 |
| O | -6.6651518125  | -5.466949656  | -0.7878576682 |
| N | -9.5276452754  | -2.3158154602 | -0.4961404674 |
| O | -8.5139110617  | -3.9360863252 | 0.7225487162  |
| C | -8.9980858763  | -2.8055966327 | 0.646046492   |
| C | -9.0347501884  | -1.8912553013 | 1.8472145488  |
| H | -7.3444649052  | -4.2518550825 | -5.328300087  |
| H | -8.0847346457  | -2.0662568368 | -4.9663731555 |
| H | -8.1510936298  | -1.097433236  | -2.8039686463 |
| H | -7.4623335785  | -3.4936205621 | -1.423909764  |
| H | -8.4472590364  | -6.316509555  | -3.4880161741 |
| H | -6.4185194787  | -6.4667952001 | -4.5941365262 |
| H | -5.6395989257  | -6.502780611  | -3.0094310407 |
| H | -4.9937611105  | -4.478313657  | -4.681695193  |
| H | -5.6445581137  | -1.2740622389 | -4.1021075052 |
| H | -5.7015398399  | -2.3495493777 | -2.2765758821 |
| H | -7.6302296408  | -7.1432845077 | -1.4772864226 |
| H | -8.6852232758  | -5.7899286835 | -1.0669694032 |
| H | -10.1410770269 | -2.5422325252 | -2.4662646563 |
| H | -9.9563179436  | -4.0441601285 | -1.5690591012 |
| H | -5.5718571227  | -4.5057927065 | -1.9618449685 |
| H | -7.0864888815  | -4.9290692347 | -0.09162718   |
| H | -9.8470897287  | -1.36125629   | -0.5048515372 |
| H | -9.5960561072  | -0.9688588425 | 1.6823902729  |
| H | -9.4746364227  | -2.4343836627 | 2.6860621335  |
| H | -8.008888072   | -1.6356570603 | 2.1250255     |

calc\_2c conf\_6

|   |               |               |               |
|---|---------------|---------------|---------------|
| C | -6.7767353238 | -2.3396637531 | -3.9914167253 |
| C | -7.9638045582 | -2.0062621222 | -3.0937844449 |
| C | -8.1095145358 | -3.2830266789 | -2.2569143141 |
| N | -7.8201457853 | -4.3586634489 | -3.2028261332 |
| C | -7.038079973  | -3.8044416274 | -4.3358752037 |
| C | -7.1099626071 | -5.561686799  | -2.7248062181 |
| C | -5.6465705221 | -5.3484281546 | -3.1124565167 |
| C | -5.7672472926 | -4.6849827758 | -4.4871164178 |
| O | -5.5973984383 | -2.1983746997 | -3.2149565419 |
| O | -7.6720197846 | -0.8660581169 | -2.3299479179 |
| C | -7.2799013947 | -5.9213616322 | -1.25901736   |
| C | -9.4977949914 | -3.3994066749 | -1.5917708365 |
| O | -4.6309585242 | -4.0096680316 | -4.948697762  |
| O | -8.6143372063 | -6.2033781635 | -0.8640786819 |
| N | -9.443249675  | -3.5310107659 | -0.1531736686 |
| O | -8.8561389405 | -1.3674804656 | 0.1484336295  |
| C | -9.0859468062 | -2.4859675356 | 0.617761554   |
| C | -9.0026618436 | -2.7365945845 | 2.1037468513  |
| H | -7.633018685  | -3.8372564407 | -5.2575107943 |
| H | -6.7192669144 | -1.7062686167 | -4.8847703526 |
| H | -8.8649788304 | -1.8582238751 | -3.7088104512 |
| H | -7.352771309  | -3.2061548493 | -1.4612018806 |
| H | -7.4944601517 | -6.4169059335 | -3.3086910317 |
| H | -5.0586087938 | -6.2700058767 | -3.1403695334 |
| H | -5.1721013691 | -4.646457343  | -2.4171374494 |

|   |                |               |               |
|---|----------------|---------------|---------------|
| H | -5.9659699941  | -5.4614367768 | -5.2341069954 |
| H | -5.7922704151  | -1.4492109057 | -2.6203816899 |
| H | -8.1318846965  | -0.9446311677 | -1.4647125906 |
| H | -6.9492102769  | -5.1044889172 | -0.6135742172 |
| H | -6.6283598458  | -6.780880172  | -1.047508782  |
| H | -10.1002148055 | -2.5145936381 | -1.8199859515 |
| H | -10.0113474192 | -4.2718164874 | -1.9920449107 |
| H | -4.4948541013  | -3.2656560769 | -4.3382228222 |
| H | -8.9645894977  | -6.8779443869 | -1.4598026793 |
| H | -9.4454293914  | -4.472037975  | 0.2145877336  |
| H | -9.2181850473  | -3.7701881437 | 2.3830760681  |
| H | -8.0034576103  | -2.4676933428 | 2.4542723443  |
| H | -9.7115526429  | -2.0766930443 | 2.6097926936  |

calc\_2c conf\_7

|   |                |               |               |
|---|----------------|---------------|---------------|
| C | -6.5099237508  | -2.5215859594 | -4.1339453034 |
| C | -6.8936606868  | -1.5646215217 | -3.0036938247 |
| C | -7.3981490681  | -2.5240346956 | -1.8999149688 |
| N | -7.9931977978  | -3.6095990138 | -2.6506825665 |
| C | -7.653507676   | -3.5289520035 | -4.075643792  |
| C | -8.079557692   | -4.9846528566 | -2.1807299773 |
| C | -8.2479739762  | -5.7621857558 | -3.5001612266 |
| C | -7.446160496   | -4.9837264375 | -4.5505443006 |
| O | -5.2574455824  | -3.0768008419 | -3.7509636706 |
| O | -5.8547628831  | -0.7220319021 | -2.5930547417 |
| C | -6.8865763873  | -5.4399961433 | -1.3353897641 |
| C | -8.3517945822  | -1.8188235147 | -0.9321789052 |
| O | -6.0897742085  | -5.4084917951 | -4.6340213839 |
| O | -5.6336211924  | -5.342617371  | -1.9971848522 |
| N | -8.5455771331  | -2.5098665304 | 0.3269015061  |
| O | -10.5506276177 | -3.4432866045 | -0.1910897465 |
| C | -9.6577159425  | -3.2418293851 | 0.6166947476  |
| C | -9.7177562985  | -3.7983110317 | 2.0254518222  |
| H | -8.4971247129  | -3.1069008661 | -4.647155703  |
| H | -6.4209395337  | -2.0178766142 | -5.1037188231 |
| H | -7.7177521969  | -0.9218195445 | -3.333764185  |
| H | -6.5110314944  | -2.8348767569 | -1.3179475105 |
| H | -8.9729619108  | -5.1145906964 | -1.5555053363 |
| H | -9.30540617    | -5.7547946397 | -3.7804810005 |
| H | -7.9261648503  | -6.8057921056 | -3.4381265753 |
| H | -7.8527029243  | -5.1185957881 | -5.5552849316 |
| H | -5.1624557661  | -3.8786304992 | -4.308041526  |
| H | -5.0514328484  | -1.2643612889 | -2.6323778527 |
| H | -7.0114079363  | -6.4931606087 | -1.068627945  |
| H | -6.8594699156  | -4.8705131173 | -0.397127579  |
| H | -7.9527071108  | -0.8211766429 | -0.7171765197 |
| H | -9.3320263736  | -1.7192262554 | -1.4032608551 |
| H | -5.8320087742  | -5.7013213715 | -3.7312028762 |
| H | -5.4860230665  | -4.4099802885 | -2.2472761262 |
| H | -7.8696924915  | -2.3567937043 | 1.0576923059  |
| H | -10.5836465201 | -3.3674472025 | 2.5344580505  |
| H | -9.8795606461  | -4.8770458486 | 1.9699033968  |
| H | -8.8237017861  | -3.6026827969 | 2.6231725403  |

calc\_2c conf\_8

|   |               |               |               |
|---|---------------|---------------|---------------|
| C | -7.1587817012 | -2.3314264424 | -4.3489187981 |
| C | -7.2527184753 | -2.0171172751 | -2.8352914139 |

|   |               |               |               |
|---|---------------|---------------|---------------|
| C | -7.8807907449 | -3.2603092074 | -2.2000926619 |
| N | -7.992726737  | -4.2667918068 | -3.2759782639 |
| C | -7.1415036279 | -3.8639521412 | -4.3928111626 |
| C | -7.5621088882 | -5.6404512304 | -2.9700391119 |
| C | -6.0336646389 | -5.6219150866 | -3.117742827  |
| C | -5.7547042719 | -4.5709761734 | -4.2023064687 |
| O | -6.0732363256 | -1.6821887523 | -4.963114182  |
| O | -5.9516911787 | -1.8076906936 | -2.3036690019 |
| C | -8.0550726673 | -6.2488803949 | -1.6585317736 |
| C | -9.2813212557 | -3.0014794348 | -1.6319099701 |
| O | -4.6804539281 | -3.6950847218 | -3.87381861   |
| O | -7.4053372429 | -5.7462396904 | -0.5179468698 |
| N | -9.2804750958 | -2.2319944328 | -0.404994782  |
| O | -9.0677561    | -4.0382136727 | 0.9465641458  |
| C | -9.1575356194 | -2.8197993831 | 0.8073386761  |
| C | -9.1512555243 | -1.8977071538 | 2.002685639   |
| H | -7.5790828548 | -4.2279490758 | -5.3301010743 |
| H | -8.0693649579 | -1.9753227069 | -4.8401126921 |
| H | -7.8534008798 | -1.1135575306 | -2.6583922922 |
| H | -7.2320514017 | -3.5958869103 | -1.3838268101 |
| H | -7.9890947529 | -6.2651700797 | -3.7689055977 |
| H | -5.6149745733 | -6.6029020282 | -3.3567754717 |
| H | -5.5884080236 | -5.2981803574 | -2.1709153559 |
| H | -5.4463274547 | -5.0320831201 | -5.1431681295 |
| H | -5.3061216286 | -2.2772983697 | -4.8277785834 |
| H | -5.5382228112 | -1.1868054876 | -2.9296389786 |
| H | -7.8564330214 | -7.3274377079 | -1.7193551226 |
| H | -9.1449558405 | -6.1354920568 | -1.5923720753 |
| H | -9.8979363054 | -2.486550298  | -2.3748001588 |
| H | -9.7648267517 | -3.9550877515 | -1.4178193931 |
| H | -4.9184490781 | -3.2521870375 | -3.0346947757 |
| H | -8.0327796199 | -5.2088083615 | 0.0008511698  |
| H | -9.2891803206 | -1.2264251834 | -0.4554140339 |
| H | -9.3399620718 | -0.8509379318 | 1.7535483324  |
| H | -9.9088174695 | -2.2401985137 | 2.7106006478  |
| H | -8.1814761594 | -1.9755017981 | 2.5006478316  |

calc\_2c conf\_9

|   |               |               |               |
|---|---------------|---------------|---------------|
| C | -6.716259386  | -2.3627110181 | -3.6896297955 |
| C | -7.7037752979 | -2.1181408066 | -2.5228160772 |
| C | -8.0094333475 | -3.5158864072 | -1.9573730598 |
| N | -7.8772689398 | -4.3867639581 | -3.114364075  |
| C | -7.0877738138 | -3.7665496544 | -4.1822398887 |
| C | -7.5839695737 | -5.8159731985 | -2.9937138231 |
| C | -6.7330016284 | -6.0988301455 | -4.253360769  |
| C | -5.996083608  | -4.7937829866 | -4.5355403271 |
| O | -5.3952046318 | -2.2669516864 | -3.1942799866 |
| O | -7.0924533139 | -1.2442002364 | -1.6036738416 |
| C | -6.9344065753 | -6.260179429  | -1.674398872  |
| C | -9.4377357906 | -3.6573620662 | -1.4059332582 |
| O | -4.8465526661 | -4.7514358391 | -3.7088566487 |
| O | -5.7747532248 | -5.5742553582 | -1.3035622024 |
| N | -9.9231541972 | -2.6223552186 | -0.4970513091 |
| O | -8.0471959231 | -2.257525636  | 0.7282669339  |
| C | -9.2516618775 | -2.0789118166 | 0.5397773278  |
| C | -10.056402701 | -1.1968990762 | 1.4662813093  |
| H | -7.7071992413 | -3.6499797216 | -5.0866716004 |
| H | -6.84500349   | -1.618599715  | -4.484516442  |



|   |                |               |               |
|---|----------------|---------------|---------------|
| H | -8.6246805745  | -1.6662435981 | -2.9174536876 |
| H | -7.2769793065  | -3.754274024  | -1.1772548595 |
| H | -8.5143036812  | -6.4012906947 | -3.0649288717 |
| H | -7.3865271932  | -6.341950927  | -5.0973437934 |
| H | -6.0329457465  | -6.9277126908 | -4.1189868903 |
| H | -5.694226053   | -4.7046460102 | -5.5868039182 |
| H | -5.4945068641  | -1.7735785172 | -2.3525250603 |
| H | -7.2567784352  | -1.5885024276 | -0.6991943988 |
| H | -6.7644323688  | -7.3482826486 | -1.759267333  |
| H | -7.6536459793  | -6.1289783711 | -0.8561649329 |
| H | -10.1105362333 | -3.6555461171 | -2.2674632916 |
| H | -9.532106173   | -4.6364139578 | -0.9197161938 |
| H | -4.7169325237  | -3.8107131041 | -3.4617018056 |
| H | -5.2655572369  | -5.3901152747 | -2.1211080339 |
| H | -10.9114676174 | -2.4320823325 | -0.5452522401 |
| H | -9.5990728718  | -0.2051854518 | 1.4896400566  |
| H | -11.1089405884 | -1.0991448251 | 1.1906691142  |
| H | -9.9900713253  | -1.6080450535 | 2.4765125452  |

calc\_2c conf\_10

|   |                |               |               |
|---|----------------|---------------|---------------|
| C | -6.622332946   | -2.4156912325 | -3.8349604814 |
| C | -7.766437461   | -2.0461008462 | -2.8983075912 |
| C | -8.0552100857  | -3.3942671617 | -2.2243647534 |
| N | -8.0033249417  | -4.3298371681 | -3.3504767749 |
| C | -7.0593970072  | -3.7814247352 | -4.3632400809 |
| C | -7.5604643454  | -5.711523423  | -3.0979259272 |
| C | -6.0408174147  | -5.678451177  | -3.2701183668 |
| C | -5.9187095823  | -4.830395043  | -4.5419501619 |
| O | -5.4442119796  | -2.5200050321 | -3.0452252139 |
| O | -7.329462409   | -1.0336087303 | -2.035541484  |
| C | -8.0956429072  | -6.4141540633 | -1.8582871781 |
| C | -9.3949364196  | -3.4357368119 | -1.4646322337 |
| O | -4.6563621877  | -4.3083191321 | -4.837586059  |
| O | -7.7014639042  | -5.8770367694 | -0.6063078974 |
| N | -9.2405924365  | -3.404982813  | -0.025389024  |
| O | -9.0543057258  | -1.1494342718 | 0.0956956368  |
| C | -9.0418952913  | -2.2539622163 | 0.6469407668  |
| C | -8.8331247245  | -2.3745323377 | 2.1371147757  |
| H | -7.5818787236  | -3.6325139446 | -5.315694724  |
| H | -6.4704879912  | -1.6864550344 | -4.639089068  |
| H | -8.6443024023  | -1.7346937973 | -3.48464603   |
| H | -7.2518887641  | -3.5633765857 | -1.4930335169 |
| H | -7.9605232205  | -6.3164311327 | -3.9284056673 |
| H | -5.5833310908  | -6.6662340481 | -3.3784344409 |
| H | -5.5553923729  | -5.1486182963 | -2.4408505486 |
| H | -6.1719286087  | -5.469939612  | -5.395199145  |
| H | -5.5409898602  | -1.8217165725 | -2.3718401229 |
| H | -7.9705570994  | -0.9535623801 | -1.2942027687 |
| H | -7.7971583756  | -7.4699471025 | -1.9286564396 |
| H | -9.1880120287  | -6.3928275242 | -1.8578365815 |
| H | -10.0278514476 | -2.590046953  | -1.7464845495 |
| H | -9.9395786722  | -4.3433346186 | -1.725149655  |
| H | -4.4685934321  | -3.643556087  | -4.1535231985 |
| H | -6.736031331   | -5.8688123746 | -0.5804392885 |
| H | -8.9781618531  | -4.2804862966 | 0.4056160512  |
| H | -9.6091382465  | -1.7959575041 | 2.6439755654  |
| H | -8.8633860808  | -3.4038949622 | 2.5007042958  |
| H | -7.8721166291  | -1.9251322089 | 2.398751881   |

calc\_2c conf\_11

|   |                |               |               |
|---|----------------|---------------|---------------|
| C | -7.3462853727  | -2.4343435998 | -4.3594814932 |
| C | -7.4024804158  | -2.0180040318 | -2.8709722304 |
| C | -7.8955112802  | -3.2593372861 | -2.1281071238 |
| N | -7.7958501732  | -4.3708376324 | -3.0790242792 |
| C | -7.1164071221  | -3.9535084303 | -4.2967309089 |
| C | -7.16508744    | -5.6339500917 | -2.6765003891 |
| C | -5.6787840176  | -5.4852466203 | -3.0582209189 |
| C | -5.6392613035  | -4.4584248435 | -4.2045310132 |
| O | -6.3989669168  | -1.6931090399 | -5.0874281341 |
| O | -6.0991307932  | -1.6682348099 | -2.4196977994 |
| C | -7.3470237157  | -6.0556718685 | -1.2233376311 |
| C | -9.3569138617  | -3.1484806144 | -1.6619743273 |
| O | -4.6750972153  | -3.4321402037 | -3.98942322   |
| O | -8.6925352504  | -6.2302490854 | -0.8613728251 |
| N | -9.521743852   | -2.3711926784 | -0.4499666362 |
| O | -9.0137864792  | -4.087257822  | 0.9434890001  |
| C | -9.3128017975  | -2.9065153635 | 0.7743611117  |
| C | -9.4767577953  | -1.9739433521 | 1.951213155   |
| H | -7.5794051846  | -4.444533433  | -5.1622046447 |
| H | -8.3236904087  | -2.2454142607 | -4.8144225213 |
| H | -8.067441041   | -1.1564835616 | -2.7207949975 |
| H | -7.266626013   | -3.3915362275 | -1.2394662782 |
| H | -7.6219346379  | -6.4158897798 | -3.298277999  |
| H | -5.2109251572  | -6.4359474566 | -3.3261317863 |
| H | -5.1103417443  | -5.0753919233 | -2.2134589234 |
| H | -5.3412122357  | -4.9159391118 | -5.1501070019 |
| H | -5.5511613778  | -2.1709865425 | -4.9762427842 |
| H | -5.7861489218  | -1.023033536  | -3.077608809  |
| H | -6.8475808401  | -5.3382643582 | -0.5583849456 |
| H | -6.8097952989  | -7.0076962045 | -1.1043177589 |
| H | -9.9750998056  | -2.7061084141 | -2.4486327058 |
| H | -9.7256750712  | -4.158367171  | -1.4861983509 |
| H | -4.9358510695  | -2.9706110276 | -3.166830942  |
| H | -8.8918492436  | -5.5714124822 | -0.1712664765 |
| H | -9.7100338046  | -1.384524074  | -0.5179820097 |
| H | -10.2432202625 | -2.3810080377 | 2.6146819885  |
| H | -8.5403206536  | -1.9490723081 | 2.5132882117  |
| H | -9.7522624263  | -0.9543327162 | 1.6720643978  |

calc\_2c conf\_12

|   |               |               |               |
|---|---------------|---------------|---------------|
| C | -7.0776509013 | -1.9221148945 | -3.370140069  |
| C | -6.2310269962 | -2.1564019854 | -2.0942504782 |
| C | -6.7339404998 | -3.4993269876 | -1.5234130004 |
| N | -7.7613128389 | -3.9807151192 | -2.4581892494 |
| C | -7.5592814185 | -3.3229858896 | -3.7491976643 |
| C | -7.7456196853 | -5.4142524475 | -2.7953926049 |
| C | -6.616860367  | -5.5638564282 | -3.8332515121 |
| C | -6.584524278  | -4.2219095167 | -4.5716142823 |
| O | -6.3334154325 | -1.2613439946 | -4.3771802876 |
| O | -4.8532743698 | -2.1440222118 | -2.3976491365 |
| C | -7.6464085416 | -6.3692563573 | -1.6158219831 |
| C | -7.2910299031 | -3.3799987139 | -0.0990553143 |
| O | -5.2435184181 | -3.7348692668 | -4.6037140008 |
| O | -8.796543042  | -6.4407646936 | -0.8261131672 |
| N | -8.4075680638 | -2.4678209705 | 0.007955745   |

|   |                |               |               |
|---|----------------|---------------|---------------|
| O | -10.0451851437 | -4.0429688413 | -0.0866616873 |
| C | -9.7032336564  | -2.8693014313 | -0.0141189194 |
| C | -10.7325166624 | -1.7648182637 | 0.0652159916  |
| H | -8.516228231   | -3.2850168449 | -4.2831339015 |
| H | -7.9550855706  | -1.3159385421 | -3.1161835392 |
| H | -6.3646547586  | -1.3345435159 | -1.384694816  |
| H | -5.857543347   | -4.1641196928 | -1.4677496261 |
| H | -8.707543958   | -5.6194900372 | -3.2832573543 |
| H | -6.7709224256  | -6.4152787439 | -4.5002543978 |
| H | -5.6484715014  | -5.7062013318 | -3.3393392723 |
| H | -6.9425147629  | -4.3178354597 | -5.6033933272 |
| H | -5.5010056732  | -1.010259691  | -3.9348545783 |
| H | -4.7118997012  | -2.883774444  | -3.0278723328 |
| H | -6.7460199694  | -6.1273659033 | -1.0226696195 |
| H | -7.4776133894  | -7.3746917301 | -2.01759703   |
| H | -7.6340403449  | -4.3533592524 | 0.2554725018  |
| H | -6.4941943005  | -3.0450685154 | 0.57384948    |
| H | -5.3213258803  | -2.8558235451 | -5.0157810852 |
| H | -9.1479702194  | -5.5461316443 | -0.6480605512 |
| H | -8.2181653171  | -1.4828686013 | 0.0939180741  |
| H | -11.2497009709 | -1.6996656736 | -0.8958215528 |
| H | -11.4756859412 | -2.0332282328 | 0.8180314388  |
| H | -10.313503519  | -0.7846105847 | 0.3059831095  |

calc\_2c conf\_13

|   |                |               |               |
|---|----------------|---------------|---------------|
| C | -6.8213471006  | -2.3001204701 | -3.5216872072 |
| C | -7.3355465181  | -2.1050751042 | -2.0985022439 |
| C | -7.2618389432  | -3.5228050779 | -1.519024773  |
| N | -7.801583547   | -4.3088480959 | -2.6138351508 |
| C | -7.4566008561  | -3.6455248664 | -3.8935308264 |
| C | -7.5602405943  | -5.7571971853 | -2.7221119904 |
| C | -7.4061922074  | -5.9621261487 | -4.2407482619 |
| C | -6.6978058915  | -4.6977330558 | -4.7174530153 |
| O | -5.4026889824  | -2.3402755633 | -3.5066374526 |
| O | -6.5592615264  | -1.1571886267 | -1.4229988899 |
| C | -6.3552283083  | -6.2806073531 | -1.9234935642 |
| C | -8.0038961781  | -3.6782230635 | -0.1908889436 |
| O | -5.3287538384  | -4.8315413096 | -4.4092685101 |
| O | -6.2203630491  | -7.6822676483 | -2.063912302  |
| N | -9.3366289685  | -3.1130214279 | -0.156457561  |
| O | -8.6370403201  | -1.0514916693 | 0.4719144332  |
| C | -9.5544179341  | -1.8265417993 | 0.1980623839  |
| C | -10.9962646348 | -1.3832627337 | 0.2655562162  |
| H | -8.3822537524  | -3.4252934543 | -4.4471972421 |
| H | -7.1488763443  | -1.4978458319 | -4.1936672891 |
| H | -8.3886081525  | -1.8009965834 | -2.1551197283 |
| H | -6.1993704834  | -3.7332718612 | -1.3116079828 |
| H | -8.4360366278  | -6.3151150438 | -2.3637857932 |
| H | -8.3919323277  | -6.0417419579 | -4.7112327932 |
| H | -6.8453927565  | -6.8633562197 | -4.4989007144 |
| H | -6.8366237174  | -4.5228057875 | -5.7944759067 |
| H | -5.126587696   | -1.758799255  | -2.7785414877 |
| H | -7.0563598104  | -0.9361979583 | -0.6108665331 |
| H | -6.5097155939  | -6.1049905066 | -0.8540348179 |
| H | -5.4450038478  | -5.7581347249 | -2.2297108859 |
| H | -8.0777503735  | -4.7345419353 | 0.081047344   |
| H | -7.4253618599  | -3.1768221075 | 0.5891482568  |
| H | -4.998238425   | -3.9473245449 | -4.172469401  |

|   |                |               |               |
|---|----------------|---------------|---------------|
| H | -5.7297736411  | -7.8398444503 | -2.8790089625 |
| H | -10.1078468849 | -3.6749946444 | -0.4769374158 |
| H | -11.708675652  | -2.1541293106 | -0.0367945238 |
| H | -11.2180199979 | -1.0799261187 | 1.291770186   |
| H | -11.1268726575 | -0.5030165047 | -0.3675966504 |

calc\_2c conf\_14

|   |                |               |               |
|---|----------------|---------------|---------------|
| C | -6.6714499758  | -2.3052590389 | -3.8683590479 |
| C | -7.7402512583  | -1.9973557647 | -2.8128647986 |
| C | -7.9338568264  | -3.3475805702 | -2.0961143133 |
| N | -7.8901885198  | -4.2707297504 | -3.2139413166 |
| C | -6.9909220715  | -3.7518336139 | -4.2627027269 |
| C | -7.660616241   | -5.7105025551 | -3.0321886503 |
| C | -6.6943618474  | -6.0772054767 | -4.176713244  |
| C | -5.8788979474  | -4.8050564168 | -4.3869082956 |
| O | -5.3874691548  | -2.1548122731 | -3.2835639125 |
| O | -7.2758358805  | -0.9453931037 | -2.0180881872 |
| C | -7.0976123213  | -6.1355735248 | -1.6696313567 |
| C | -9.266523792   | -3.4680785883 | -1.3293733603 |
| O | -4.9168752096  | -4.7441381217 | -3.3610634861 |
| O | -7.0066440023  | -7.5422748928 | -1.5747309128 |
| N | -9.1776912806  | -3.1921512671 | 0.0934691472  |
| O | -9.1853151921  | -0.9370392089 | -0.092607704  |
| C | -9.1596891987  | -1.947600729  | 0.6122378164  |
| C | -9.1224833159  | -1.8454333381 | 2.1177846154  |
| H | -7.5252865068  | -3.7334840648 | -5.2245200315 |
| H | -6.7467559634  | -1.6286611353 | -4.7276752465 |
| H | -8.6806246465  | -1.73825543   | -3.3213346076 |
| H | -7.1027669814  | -3.4700931432 | -1.3801329006 |
| H | -8.6134106361  | -6.2525197929 | -3.1639323419 |
| H | -7.2491992081  | -6.3234874698 | -5.0879533617 |
| H | -6.0637564515  | -6.928664274  | -3.9132074312 |
| H | -5.4059883124  | -4.7707387459 | -5.3797562863 |
| H | -5.5138046058  | -1.5064590615 | -2.5666719923 |
| H | -7.9439052863  | -0.782503809  | -1.3178790205 |
| H | -7.7157610911  | -5.7339729659 | -0.8499028253 |
| H | -6.0838295772  | -5.7528236571 | -1.5538989668 |
| H | -10.0142427152 | -2.7979816296 | -1.7635468838 |
| H | -9.6496014553  | -4.4853673294 | -1.4317943667 |
| H | -4.7351198625  | -3.7985658861 | -3.2107162759 |
| H | -7.8869798545  | -7.9036374289 | -1.7423803412 |
| H | -9.1019104924  | -3.9734675675 | 0.7245307175  |
| H | -9.9789318212  | -1.2523024449 | 2.4464391119  |
| H | -9.1406935906  | -2.8110570543 | 2.6280044547  |
| H | -8.2207469061  | -1.3029388757 | 2.4116883295  |

calc\_2c conf\_15

|   |               |               |               |
|---|---------------|---------------|---------------|
| C | -6.2417042566 | -2.6029405763 | -3.717873018  |
| C | -7.2770248313 | -1.966808115  | -2.7851662108 |
| C | -7.8770602612 | -3.1865108831 | -2.0498287823 |
| N | -7.8768629825 | -4.225479672  | -3.0663339565 |
| C | -7.0142638679 | -3.8289496121 | -4.2020239523 |
| C | -7.6330973657 | -5.6270388403 | -2.7313486038 |
| C | -7.231495717  | -6.1824964643 | -4.1050263196 |
| C | -6.2873611571 | -5.1103776382 | -4.6478104734 |
| O | -5.1259896598 | -2.8940648838 | -2.9017063864 |
| O | -6.732815243  | -0.9985833139 | -1.9230535502 |

|   |                |               |               |
|---|----------------|---------------|---------------|
| C | -6.5380324601  | -5.8372489317 | -1.654069407  |
| C | -9.2626120726  | -2.9165753087 | -1.4724004626 |
| O | -4.9723406768  | -5.2415610001 | -4.1045459647 |
| O | -5.7006660585  | -6.9352708842 | -2.0308644528 |
| N | -9.1844866447  | -1.89080851   | -0.4561436429 |
| O | -10.6451993801 | -2.8865157796 | 0.9670688593  |
| C | -9.8734877644  | -1.9732242202 | 0.7119885951  |
| C | -9.626915942   | -0.8413933618 | 1.6890731011  |
| H | -7.6466589375  | -3.5024161552 | -5.0423267192 |
| H | -5.9552074178  | -1.937037679  | -4.5427201491 |
| H | -8.056104831   | -1.4685502539 | -3.3732067764 |
| H | -7.2033292573  | -3.4117917054 | -1.2082473488 |
| H | -8.5603974327  | -6.0982338702 | -2.3894259496 |
| H | -8.125576992   | -6.229400353  | -4.7333274922 |
| H | -6.7808485318  | -7.1751461202 | -4.0694132643 |
| H | -6.1880969935  | -5.1462228883 | -5.7365581879 |
| H | -4.7240409094  | -3.7048919763 | -3.2768476019 |
| H | -5.8755359458  | -1.3652177658 | -1.6493688356 |
| H | -6.9957020834  | -6.0367062758 | -0.6784275599 |
| H | -5.9308060154  | -4.9289149509 | -1.5721758438 |
| H | -9.9438530894  | -2.6277990567 | -2.2842133195 |
| H | -9.6823935399  | -3.8083367092 | -1.0002024863 |
| H | -4.9880314997  | -5.9738665674 | -3.4554180854 |
| H | -5.0946610871  | -7.1117145264 | -1.2994447643 |
| H | -8.5018194198  | -1.1576716071 | -0.5932208196 |
| H | -10.5718573949 | -0.3236653257 | 1.8716217245  |
| H | -9.3007960933  | -1.2648832106 | 2.6419514121  |
| H | -8.8858661869  | -0.1146850075 | 1.3470366948  |

calc\_2c conf\_16

|   |                |               |               |
|---|----------------|---------------|---------------|
| C | -7.4816816338  | -2.1858258081 | -3.4047906644 |
| C | -6.7415461771  | -2.3642794306 | -2.0598187458 |
| C | -7.1368905405  | -3.7529164013 | -1.5491830537 |
| N | -7.9725481097  | -4.363339653  | -2.6198116772 |
| C | -7.7360152321  | -3.626262893  | -3.8632296721 |
| C | -7.6902059976  | -5.7562541921 | -2.9932822498 |
| C | -6.4356266366  | -5.6927408625 | -3.8770019285 |
| C | -6.5677385827  | -4.3511843298 | -4.6202362508 |
| O | -6.7909501226  | -1.36644266   | -4.3130859283 |
| O | -5.3308486772  | -2.3400585027 | -2.2720150956 |
| C | -7.657284322   | -6.7704261931 | -1.86561311   |
| C | -7.9297073762  | -3.702901232  | -0.2449593766 |
| O | -5.3523811917  | -3.6200651402 | -4.686000782  |
| O | -6.4941688791  | -6.6089261418 | -1.0786949886 |
| N | -9.2040836759  | -3.0527856507 | -0.4308398097 |
| O | -8.8622135222  | -1.3846578133 | 1.0731727138  |
| C | -9.5647157566  | -1.917798766  | 0.2271151841  |
| C | -10.9188708265 | -1.3534325818 | -0.1522498831 |
| H | -8.6326080594  | -3.6826175834 | -4.4919878469 |
| H | -8.4452258818  | -1.7070652512 | -3.2055785605 |
| H | -7.0050507332  | -1.5765039205 | -1.3454717594 |
| H | -6.2209374058  | -4.3235394462 | -1.3657410588 |
| H | -8.5391606836  | -6.0640232837 | -3.6218910168 |
| H | -6.3458900949  | -6.5470828894 | -4.553130068  |
| H | -5.538273253   | -5.6758870186 | -3.2507698212 |
| H | -6.8506010554  | -4.5025807097 | -5.6644341161 |
| H | -6.1489140056  | -1.9539084819 | -4.7601941503 |
| H | -5.1666793225  | -1.5038185771 | -2.7392843609 |

|   |                |               |               |
|---|----------------|---------------|---------------|
| H | -7.6827752218  | -7.7715172036 | -2.3204789942 |
| H | -8.569914184   | -6.6562771381 | -1.2627663938 |
| H | -8.0742406264  | -4.7224089051 | 0.1288224481  |
| H | -7.3882196104  | -3.1401638479 | 0.5181468204  |
| H | -5.0880525226  | -3.4080881983 | -3.7651152543 |
| H | -6.4951258866  | -7.2897464313 | -0.3955411793 |
| H | -9.7663166291  | -3.4022653908 | -1.1921673415 |
| H | -11.5511288919 | -1.3334301473 | 0.7387302584  |
| H | -10.7895414577 | -0.3192613621 | -0.4799369035 |
| H | -11.4308672143 | -1.9165159617 | -0.9366853831 |

calc\_2c conf\_17

|   |               |               |               |
|---|---------------|---------------|---------------|
| C | -6.6750942072 | -2.3507917887 | -3.8877847348 |
| C | -7.7453035248 | -1.9215536686 | -2.8917137134 |
| C | -8.0478919826 | -3.2385504137 | -2.1561917208 |
| N | -8.0100242703 | -4.2352567417 | -3.2270042521 |
| C | -7.1850724061 | -3.7136974024 | -4.3447360165 |
| C | -7.5150602423 | -5.5924368108 | -2.9224151729 |
| C | -6.040585224  | -5.577537671  | -3.3258239436 |
| C | -6.0829381869 | -4.7734803501 | -4.6304491746 |
| O | -5.451750899  | -2.4746011502 | -3.1765433466 |
| O | -7.2243037358 | -0.9038698236 | -2.0838527953 |
| C | -7.7852378912 | -6.0843997116 | -1.5052042708 |
| C | -9.4057343386 | -3.2279455076 | -1.4139587298 |
| O | -4.8645639178 | -4.2561870778 | -5.0846942011 |
| O | -7.3869124049 | -7.4274984032 | -1.3380966462 |
| N | -9.3064964415 | -3.2441085403 | 0.0331496798  |
| O | -8.6998109478 | -1.0727696524 | 0.2149677389  |
| C | -8.9699713701 | -2.1499738331 | 0.7473186293  |
| C | -8.9533403431 | -2.3004836009 | 2.2489018826  |
| H | -7.8076854543 | -3.5676599519 | -5.2361740177 |
| H | -6.5582463149 | -1.6467372961 | -4.7201661665 |
| H | -8.6451495194 | -1.591407684  | -3.433802802  |
| H | -7.2467043322 | -3.3706853195 | -1.4122447409 |
| H | -8.0424208085 | -6.2911041656 | -3.5878604659 |
| H | -5.6081995248 | -6.571497168  | -3.4747883883 |
| H | -5.4437769489 | -5.0308007981 | -2.5854309113 |
| H | -6.4342177332 | -5.4327892734 | -5.4314350643 |
| H | -5.4792217697 | -1.7542409949 | -2.5201114842 |
| H | -7.7641164174 | -0.850277924  | -1.2653292279 |
| H | -8.8603824551 | -6.0739140009 | -1.3013942631 |
| H | -7.2952733012 | -5.4334329256 | -0.7659849933 |
| H | -9.9837633682 | -2.3428555361 | -1.6987188245 |
| H | -9.9847244553 | -4.1000302434 | -1.7197046202 |
| H | -4.585615635  | -3.6025366301 | -4.4216851312 |
| H | -6.430895739  | -7.4639016887 | -1.4678338124 |
| H | -9.4836596418 | -4.1067061897 | 0.5214516352  |
| H | -7.9527509439 | -2.0610368441 | 2.6163900772  |
| H | -9.6403726843 | -1.5683271079 | 2.6794037333  |
| H | -9.232730619  | -3.29791611   | 2.5955502564  |

calc\_2c conf\_18

|   |               |               |               |
|---|---------------|---------------|---------------|
| C | -7.2459899791 | -2.4653046733 | -4.5053771967 |
| C | -7.0338454379 | -1.8665982356 | -3.0973965848 |
| C | -7.5270658067 | -2.9608957192 | -2.1249149478 |
| N | -7.7871904212 | -4.1659951757 | -2.9550107395 |
| C | -7.1668636251 | -3.9744664815 | -4.2735478612 |

|   |                |               |               |
|---|----------------|---------------|---------------|
| C | -7.2417156673  | -5.4610212373 | -2.5299326272 |
| C | -5.756882357   | -5.4346471022 | -2.9243397953 |
| C | -5.7418167222  | -4.6208769374 | -4.2194262475 |
| O | -6.303142231   | -1.9648443089 | -5.4371107054 |
| O | -5.6922317845  | -1.4703972195 | -2.9208880588 |
| C | -7.4950820235  | -5.898114065  | -1.0998541386 |
| C | -8.7890444917  | -2.4748014687 | -1.4056236683 |
| O | -4.6707448931  | -3.6880971818 | -4.1642665154 |
| O | -8.864442149   | -6.1350424857 | -0.8128530636 |
| N | -9.2580324976  | -3.35001236   | -0.3654721496 |
| O | -9.1847077056  | -1.7732407104 | 1.2740301202  |
| C | -9.4145720434  | -2.9198663875 | 0.9174458396  |
| C | -9.9211468716  | -3.9708433009 | 1.8839837174  |
| H | -7.7521478796  | -4.5196105606 | -5.0239897354 |
| H | -8.2563170034  | -2.2240311111 | -4.8553017645 |
| H | -7.6136707657  | -0.9481573728 | -2.9747374885 |
| H | -6.7398582076  | -3.1267036233 | -1.3766203368 |
| H | -7.7346597221  | -6.2081455562 | -3.1758805568 |
| H | -5.3221711636  | -6.4310402389 | -3.0355342247 |
| H | -5.1674355618  | -4.896263262  | -2.1730907199 |
| H | -5.5999248357  | -5.2666000861 | -5.094851228  |
| H | -5.8305274349  | -1.2661618867 | -4.9471921691 |
| H | -5.1382830548  | -2.2667471776 | -3.0674273332 |
| H | -7.1702737542  | -5.1380748458 | -0.3857922967 |
| H | -6.9035602987  | -6.8039208755 | -0.9076516706 |
| H | -8.5862237183  | -1.516112796  | -0.9212283345 |
| H | -9.5725753758  | -2.3198453264 | -2.1602074006 |
| H | -4.8008711458  | -3.1202858775 | -4.9460498153 |
| H | -9.2208878766  | -6.7175358244 | -1.4960225694 |
| H | -9.4444785848  | -4.3209626379 | -0.593386582  |
| H | -9.3317548939  | -3.9131657485 | 2.8011667732  |
| H | -10.9566711545 | -3.7377173832 | 2.1485586567  |
| H | -9.8771908607  | -4.9858527589 | 1.4827934189  |

calc\_2c conf\_19

|   |                |               |               |
|---|----------------|---------------|---------------|
| C | -7.4768563454  | -2.2378111632 | -3.702420941  |
| C | -6.758046429   | -2.1371007271 | -2.3318543598 |
| C | -6.9302804079  | -3.5257290136 | -1.6789707413 |
| N | -7.7277974125  | -4.3288212534 | -2.6374637383 |
| C | -7.5485806948  | -3.7408225541 | -3.9717780532 |
| C | -7.3212994553  | -5.7328717716 | -2.8397426614 |
| C | -6.076405498   | -5.669207652  | -3.7392414759 |
| C | -6.2880556549  | -4.4146646713 | -4.596445939  |
| O | -6.8005937357  | -1.5030934345 | -4.7055452632 |
| O | -5.410574159   | -1.7562950696 | -2.5002380597 |
| C | -7.1687811784  | -6.5358007271 | -1.5620202419 |
| C | -7.6280525463  | -3.4516925831 | -0.3213165924 |
| O | -5.1172740729  | -3.6064895506 | -4.5361396901 |
| O | -8.3865302306  | -6.6928975426 | -0.8712362574 |
| N | -9.0049365666  | -3.0581574211 | -0.5003504487 |
| O | -9.1422137514  | -1.840430324  | 1.4057384163  |
| C | -9.6690700412  | -2.2734483284 | 0.3940428499  |
| C | -11.1138201025 | -1.9782988849 | 0.0489003861  |
| H | -8.4148575548  | -3.9999212985 | -4.5914515614 |
| H | -8.4990299894  | -1.8537538116 | -3.6030984978 |
| H | -7.2059576094  | -1.3546428884 | -1.7157513067 |
| H | -5.9235928324  | -3.9379154776 | -1.5212217565 |
| H | -8.1402304247  | -6.1976458699 | -3.4048385632 |

|   |                |               |               |
|---|----------------|---------------|---------------|
| H | -5.9454519744  | -6.5758412388 | -4.3342865565 |
| H | -5.1644125495  | -5.5299064697 | -3.1483642112 |
| H | -6.4834568542  | -4.6702469412 | -5.6444902413 |
| H | -6.1424490516  | -0.9759155905 | -4.2145145071 |
| H | -4.9925983827  | -2.4773992983 | -3.015483036  |
| H | -6.3919085515  | -6.090286311  | -0.9209068206 |
| H | -6.8273380924  | -7.5430248081 | -1.8169595671 |
| H | -7.5599435608  | -4.4135119318 | 0.203280104   |
| H | -7.1439483501  | -2.710705759  | 0.3194033738  |
| H | -5.3589688804  | -2.804428197  | -5.0344004754 |
| H | -8.8094510838  | -5.8251579207 | -0.8318031362 |
| H | -9.459435003   | -3.4056493026 | -1.3329924373 |
| H | -11.4192572769 | -2.3476083175 | -0.9333746339 |
| H | -11.755792446  | -2.429341469  | 0.8100257749  |
| H | -11.2707512494 | -0.8984644268 | 0.0913108667  |

calc\_2c conf\_20

|   |               |               |               |
|---|---------------|---------------|---------------|
| C | -7.1685462742 | -2.4095061601 | -4.1921687604 |
| C | -7.8955671769 | -2.2084557727 | -2.8383358362 |
| C | -7.8163167015 | -3.5682450473 | -2.1111406772 |
| N | -7.8440868985 | -4.5016607324 | -3.2570164414 |
| C | -6.9124088501 | -3.9192107155 | -4.2444831957 |
| C | -7.3050858068 | -5.8673317779 | -3.1109477016 |
| C | -5.7705146834 | -5.7596529875 | -3.1542074982 |
| C | -5.489479193  | -4.4165222926 | -3.8460861038 |
| O | -5.9860262034 | -1.6317017502 | -4.2711410045 |
| O | -7.2990540637 | -1.132043362  | -2.1721355185 |
| C | -7.8725846656 | -6.6504211599 | -1.9498617367 |
| C | -8.9934433927 | -3.7633989266 | -1.1340329239 |
| O | -4.8350024072 | -3.5914301493 | -2.9102890547 |
| O | -9.2788487339 | -6.7875361509 | -2.0417189589 |
| N | -8.6999763007 | -3.3498082063 | 0.2277628962  |
| O | -9.0221182782 | -1.1308590843 | -0.0924003304 |
| C | -8.7593919396 | -2.0738476835 | 0.6574056802  |
| C | -8.4940820182 | -1.847122573  | 2.1265306926  |
| H | -7.1464130441 | -4.3367216108 | -5.2315715734 |
| H | -7.8286913637 | -2.1140181169 | -5.0151137861 |
| H | -8.9538957868 | -1.9958579084 | -3.0389474265 |
| H | -6.8677142082 | -3.603511226  | -1.5574693223 |
| H | -7.6307706127 | -6.3900053157 | -4.0226566506 |
| H | -5.3276250421 | -6.6113529462 | -3.6765527985 |
| H | -5.3318779992 | -5.7143818712 | -2.1529660332 |
| H | -4.8733164326 | -4.5386877035 | -4.748713188  |
| H | -6.1269886422 | -0.9195131281 | -3.6175970818 |
| H | -7.8939366416 | -0.8928257743 | -1.4308859397 |
| H | -7.5923757086 | -6.1712727881 | -0.9989370127 |
| H | -7.4331961616 | -7.6537076208 | -1.9422856718 |
| H | -9.858681963  | -3.1884781987 | -1.478378057  |
| H | -9.3026103696 | -4.8073137132 | -1.0869469695 |
| H | -4.8882979917 | -2.695137487  | -3.2916431218 |
| H | -9.5756055129 | -6.1292643351 | -2.6865245044 |
| H | -8.4547549383 | -4.0644868244 | 0.8936180711  |
| H | -9.3416636282 | -1.3058922148 | 2.5527823653  |
| H | -8.3344165979 | -2.7660607022 | 2.6950955459  |
| H | -7.6146337674 | -1.2067559827 | 2.2299596278  |

calc\_2c conf\_21



|   |                |               |               |
|---|----------------|---------------|---------------|
| C | -7.4359554683  | -2.3492301146 | -3.9937547643 |
| C | -7.5283450146  | -2.2213448754 | -2.4589429596 |
| C | -7.9740357897  | -3.6207221156 | -1.9902448623 |
| N | -7.8990689278  | -4.5221371866 | -3.1716713622 |
| C | -7.1099216272  | -3.8297385158 | -4.2028383132 |
| C | -7.1438561983  | -5.7758244428 | -2.9678631738 |
| C | -5.6742108077  | -5.3584304213 | -2.9347127566 |
| C | -5.6054199229  | -4.2429059326 | -3.9990672525 |
| O | -6.6041234125  | -1.4445252797 | -4.6473927341 |
| O | -6.2644142589  | -1.8863045957 | -1.913164436  |
| C | -7.6958920882  | -6.604288299  | -1.8264398035 |
| C | -9.3944688835  | -3.6597621438 | -1.4267847523 |
| O | -4.7241737785  | -3.1894576871 | -3.6648453838 |
| O | -9.0620200719  | -6.9000897621 | -2.0489075987 |
| N | -9.6529806448  | -2.7520632924 | -0.3111946644 |
| O | -7.5558201903  | -2.3352083989 | 0.5087526785  |
| C | -8.7789655276  | -2.2145471914 | 0.5707188375  |
| C | -9.4048303629  | -1.4076637918 | 1.6883625158  |
| H | -7.4370429411  | -4.1622500436 | -5.1932934911 |
| H | -8.4472846582  | -2.1791376943 | -4.3799431368 |
| H | -8.252136397   | -1.4466247426 | -2.1809886208 |
| H | -7.2832486863  | -3.9361714239 | -1.2055117582 |
| H | -7.3113129312  | -6.3637705117 | -3.8823047475 |
| H | -4.984255861   | -6.1812841696 | -3.1371674969 |
| H | -5.4085861601  | -4.9402909946 | -1.9565900345 |
| H | -5.2189085912  | -4.6398806492 | -4.9409202776 |
| H | -5.6936729678  | -1.7294338054 | -4.447098983  |
| H | -6.3969324045  | -1.9280177646 | -0.9465014176 |
| H | -7.5623793533  | -6.0843863533 | -0.8661497064 |
| H | -7.1497039752  | -7.5506639208 | -1.7579481058 |
| H | -10.0889693027 | -3.3941956933 | -2.2315959561 |
| H | -9.6289941615  | -4.6860421003 | -1.1213113159 |
| H | -5.0458956128  | -2.791745415  | -2.8262829022 |
| H | -9.3786499972  | -6.2171991666 | -2.6594578604 |
| H | -10.6288217671 | -2.597586848  | -0.1128105642 |
| H | -8.9756929663  | -0.4033543041 | 1.6737806378  |
| H | -10.493271991  | -1.331187548  | 1.6358771975  |
| H | -9.1267362986  | -1.8645328041 | 2.6412093255  |

calc\_2c conf\_22

|   |                |               |               |
|---|----------------|---------------|---------------|
| C | -7.5713198783  | -2.2681069679 | -3.4441407678 |
| C | -6.8176896331  | -2.271478091  | -2.0895335447 |
| C | -6.9648715512  | -3.7097163833 | -1.549899528  |
| N | -7.7403022802  | -4.4480215468 | -2.5665908206 |
| C | -7.6250438998  | -3.7437116741 | -3.8443428367 |
| C | -7.3206627286  | -5.8154437236 | -2.8905437303 |
| C | -6.1267410455  | -5.6619447725 | -3.8542615331 |
| C | -6.3858279968  | -4.335911614  | -4.5805890446 |
| O | -6.9330884004  | -1.4347120746 | -4.3963139984 |
| O | -5.4745240598  | -1.868987316  | -2.269377268  |
| C | -7.0393168443  | -6.7201576754 | -1.7110106326 |
| C | -7.6800530568  | -3.7622855862 | -0.1970828573 |
| O | -5.2224596238  | -3.5204369311 | -4.4887363836 |
| O | -8.2343048915  | -6.9020212706 | -0.9790067869 |
| N | -9.0582354179  | -3.3571307688 | -0.3188149551 |
| O | -8.8670632786  | -1.4274573351 | 0.8642755814  |
| C | -9.5492867373  | -2.2080020582 | 0.2148780714  |
| C | -11.0233675712 | -1.9590804365 | -0.0319274697 |

|   |                |               |               |
|---|----------------|---------------|---------------|
| H | -8.5120908403  | -3.9613787858 | -4.452237071  |
| H | -8.5963989187  | -1.914967998  | -3.2854195899 |
| H | -7.2449466685  | -1.5445222242 | -1.3958947863 |
| H | -5.9470868199  | -4.1085073437 | -1.4164300699 |
| H | -8.1589379634  | -6.2681445754 | -3.4371478807 |
| H | -6.0253332302  | -6.5097837981 | -4.5360740643 |
| H | -5.1838866834  | -5.5671259342 | -3.3039422719 |
| H | -6.6189318932  | -4.4950155091 | -5.6403754599 |
| H | -6.2655174198  | -0.9488770174 | -3.8757249669 |
| H | -5.0679209781  | -2.5398094434 | -2.8555477505 |
| H | -6.2415427033  | -6.2935495577 | -1.0847172795 |
| H | -6.663663928   | -7.6759466548 | -2.1054058339 |
| H | -7.6455694409  | -4.7793053046 | 0.2031343914  |
| H | -7.2014339756  | -3.0853373791 | 0.5133649423  |
| H | -5.5027271469  | -2.6721154204 | -4.8801423452 |
| H | -8.0524135677  | -7.516462946  | -0.2575716859 |
| H | -9.6265282145  | -3.9214334596 | -0.9312662528 |
| H | -11.1458806933 | -0.958414246  | -0.452014508  |
| H | -11.4906088163 | -2.6896634969 | -0.6969016952 |
| H | -11.5454212031 | -1.9730326799 | 0.9283326829  |

calc\_2c conf\_23

|   |               |               |               |
|---|---------------|---------------|---------------|
| C | -7.36793157   | -2.6465208664 | -4.6215955006 |
| C | -7.4414976165 | -1.949584423  | -3.2415598021 |
| C | -7.7125917851 | -3.0805837295 | -2.2192132579 |
| N | -7.7672490138 | -4.3387826773 | -3.0195209596 |
| C | -7.0414388203 | -4.0956326137 | -4.2784597895 |
| C | -7.0531600878 | -5.5215014709 | -2.5006958334 |
| C | -5.5625574924 | -5.2370138455 | -2.7032878334 |
| C | -5.5374778351 | -4.4407873263 | -4.0144429386 |
| O | -6.4245153687 | -2.0242090959 | -5.4746263165 |
| O | -6.2710362762 | -1.2066583031 | -2.988193705  |
| C | -7.5189265115 | -5.9505693827 | -1.1303607737 |
| C | -9.0072661049 | -2.7688256991 | -1.4527972404 |
| O | -4.6993063722 | -3.3048627371 | -3.8513833678 |
| O | -8.9231693113 | -6.1846202725 | -1.1472208582 |
| N | -9.2279285101 | -3.5057411042 | -0.234967535  |
| O | -9.1661820373 | -1.6742960197 | 1.1155539616  |
| C | -9.3083612402 | -2.8791518015 | 0.9733748743  |
| C | -9.596917368  | -3.7925358899 | 2.14664322    |
| H | -7.4194939815 | -4.7858349283 | -5.0412197811 |
| H | -8.3555409852 | -2.6176873014 | -5.0962812025 |
| H | -8.2480170386 | -1.2124189301 | -3.2303524218 |
| H | -6.8827021215 | -3.0828988071 | -1.4989518194 |
| H | -7.33002171   | -6.3370373838 | -3.1864240439 |
| H | -4.9581614647 | -6.1460995707 | -2.7417247854 |
| H | -5.16168564   | -4.6042722146 | -1.9044540902 |
| H | -5.1505618586 | -5.0476925681 | -4.8420529083 |
| H | -6.1867509474 | -1.2004537002 | -5.0083563435 |
| H | -5.5369285105 | -1.8548170364 | -2.961945917  |
| H | -7.2788618944 | -5.187159835  | -0.3793293467 |
| H | -7.0189101942 | -6.8793339697 | -0.8383888805 |
| H | -8.9779427938 | -1.7197145909 | -1.1468818954 |
| H | -9.8527966915 | -2.9018721387 | -2.1415339637 |
| H | -4.813905368  | -2.8035246385 | -4.6795650057 |
| H | -9.2438050999 | -5.8002144002 | -1.979154025  |
| H | -9.3899529867 | -4.5056476061 | -0.2943536376 |
| H | -8.838405841  | -3.6261646383 | 2.9147799445  |

|   |                |               |              |
|---|----------------|---------------|--------------|
| H | -10.5615197324 | -3.5143175258 | 2.5791713282 |
| H | -9.6185218185  | -4.8529609576 | 1.8837724508 |

calc\_2c conf\_24

|   |                |               |               |
|---|----------------|---------------|---------------|
| C | -7.3845072046  | -2.1450618701 | -3.3301354947 |
| C | -6.703964265   | -2.4141708172 | -1.9641964348 |
| C | -7.1417849601  | -3.8368028023 | -1.5644736693 |
| N | -7.9971360224  | -4.3284915881 | -2.6742409447 |
| C | -7.6925809627  | -3.5420585051 | -3.8730121881 |
| C | -7.8160386685  | -5.7127879048 | -3.124306792  |
| C | -6.5615584265  | -5.6925873154 | -4.0182091418 |
| C | -6.5488126156  | -4.2866640846 | -4.6292854861 |
| O | -6.5628033711  | -1.36277744   | -4.1790710518 |
| O | -5.3030441633  | -2.2599068887 | -2.0729675259 |
| C | -7.8473332017  | -6.7925576956 | -2.0489671046 |
| C | -7.9214110063  | -3.8588609119 | -0.2503157479 |
| O | -5.2625319776  | -3.7096109671 | -4.4368181836 |
| O | -6.7433427472  | -6.8106604445 | -1.1684544615 |
| N | -9.1825529456  | -3.1703042866 | -0.3853063791 |
| O | -8.7907011398  | -1.594463339  | 1.2043834443  |
| C | -9.5136436033  | -2.0682314964 | 0.3406440075  |
| C | -10.8650324555 | -1.4638562481 | 0.0158001752  |
| H | -8.5742170912  | -3.5322050901 | -4.5259793128 |
| H | -8.3326977053  | -1.6210917107 | -3.1643339225 |
| H | -7.0150742261  | -1.6795772645 | -1.2184607793 |
| H | -6.2431492665  | -4.4493357034 | -1.4295223883 |
| H | -8.682701259   | -5.9265518726 | -3.7679613538 |
| H | -6.5616556199  | -6.4873779384 | -4.7686326075 |
| H | -5.6501267646  | -5.7971425077 | -3.419248917  |
| H | -6.7658697015  | -4.3116262263 | -5.7040613264 |
| H | -5.8363588244  | -1.0691301047 | -3.5964348201 |
| H | -5.0045542836  | -2.9466961803 | -2.7035024438 |
| H | -7.9645031213  | -7.7652022882 | -2.548242386  |
| H | -8.7304307972  | -6.6458089206 | -1.4218040676 |
| H | -8.0827923983  | -4.8936266664 | 0.0686385995  |
| H | -7.3587945062  | -3.3522977379 | 0.536539324   |
| H | -5.3702128826  | -2.7910014363 | -4.7470893713 |
| H | -5.978125947   | -7.1463354089 | -1.650657303  |
| H | -9.7584533291  | -3.4586953549 | -1.1616058822 |
| H | -11.3827450427 | -1.953437217  | -0.8130315889 |
| H | -11.495599016  | -1.5193147485 | 0.9066822558  |
| H | -10.7301584809 | -0.405691017  | -0.21935873   |

calc\_2c conf\_25

|   |               |               |               |
|---|---------------|---------------|---------------|
| C | -7.3054715723 | -2.3213517297 | -3.8385549614 |
| C | -7.2120284058 | -2.311596067  | -2.2916792505 |
| C | -7.5980931681 | -3.7447594907 | -1.8661960092 |
| N | -7.8517738753 | -4.5007443376 | -3.1148193376 |
| C | -7.1689429144 | -3.7980786375 | -4.2103757603 |
| C | -7.2860597146 | -5.8591842811 | -3.202021231  |
| C | -5.7853481413 | -5.6645150605 | -3.4486415671 |
| C | -5.7199526885 | -4.3841096038 | -4.2914864026 |
| O | -6.3258065296 | -1.4830320501 | -4.427598712  |
| O | -5.9225604454 | -1.9153403313 | -1.8719403004 |
| C | -7.6992358197 | -6.7529877919 | -2.0521456053 |
| C | -8.8446772289 | -3.7728139697 | -0.9723712688 |
| O | -4.7171009804 | -3.5277256178 | -3.758534355  |

|   |               |               |               |
|---|---------------|---------------|---------------|
| O | -9.1013906268 | -6.9169093831 | -2.0145256302 |
| N | -8.6568161027 | -3.0919066507 | 0.2880620756  |
| O | -9.7347702193 | -1.1890853672 | -0.3160014357 |
| C | -9.1328696572 | -1.8381077594 | 0.5272147738  |
| C | -8.8557212551 | -1.2891443629 | 1.9097535114  |
| H | -7.6824504756 | -4.0250487567 | -5.1515048894 |
| H | -8.300402865  | -1.9787355722 | -4.1435019203 |
| H | -7.8969356181 | -1.5764142146 | -1.8665684211 |
| H | -6.7473703092 | -4.15060901   | -1.2974540926 |
| H | -7.7267428134 | -6.3004168483 | -4.1075511614 |
| H | -5.3227748882 | -6.524138768  | -3.9391118219 |
| H | -5.2451649566 | -5.4888378678 | -2.5116917434 |
| H | -5.4717782086 | -4.6065584056 | -5.3364273341 |
| H | -5.9539181767 | -0.9860448355 | -3.6749002805 |
| H | -5.3005238988 | -2.5751618932 | -2.2439441103 |
| H | -7.3220260231 | -6.3500264194 | -1.0991044112 |
| H | -7.2529038191 | -7.7444046694 | -2.1783240341 |
| H | -9.6660766851 | -3.2711606779 | -1.4888464479 |
| H | -9.1472992707 | -4.805684705  | -0.7771306139 |
| H | -4.8250625418 | -2.6967494829 | -4.2584654786 |
| H | -9.4774423094 | -6.1179863896 | -2.4120175133 |
| H | -8.148540319  | -3.5630913776 | 1.0185449862  |
| H | -8.1535139348 | -0.4559024972 | 1.8220127     |
| H | -9.7860359448 | -0.8907877047 | 2.3191023011  |
| H | -8.4434175969 | -2.0248474122 | 2.6047457529  |

calc\_2c conf\_26

|   |               |               |               |
|---|---------------|---------------|---------------|
| C | -7.201144057  | -2.2422100028 | -3.8116053501 |
| C | -7.180345366  | -2.3536517594 | -2.2697143977 |
| C | -7.7993626364 | -3.7188743396 | -1.9578992803 |
| N | -7.9989668885 | -4.3970428481 | -3.2609090101 |
| C | -7.2053028513 | -3.7041048556 | -4.2737260947 |
| C | -7.5697212723 | -5.7937127687 | -3.3718299132 |
| C | -6.0455434201 | -5.7324517267 | -3.5608390941 |
| C | -5.8166035785 | -4.4331899396 | -4.3572175086 |
| O | -6.1651421012 | -1.4401882205 | -4.321442973  |
| O | -5.8283603237 | -2.3361206221 | -1.8008329353 |
| C | -8.0803024855 | -6.7515165053 | -2.3017580127 |
| C | -9.1414479529 | -3.6183747308 | -1.227257761  |
| O | -4.7105577237 | -3.679364039  | -3.8869744631 |
| O | -7.5612415601 | -6.559628682  | -0.9987394222 |
| N | -9.0024259008 | -3.1836867269 | 0.1439328852  |
| O | -9.5814711949 | -1.0196986301 | -0.2215769542 |
| C | -9.2316608458 | -1.9050217477 | 0.5464254226  |
| C | -9.026183122  | -1.640844262  | 2.0234083227  |
| H | -7.6970682596 | -3.8010971501 | -5.2488351087 |
| H | -8.1454768224 | -1.7792731623 | -4.1122009529 |
| H | -7.7308799031 | -1.5361351337 | -1.7950392868 |
| H | -7.1047436952 | -4.265850753  | -1.310628947  |
| H | -8.0093645199 | -6.1643008694 | -4.3104393313 |
| H | -5.631980115  | -6.615044655  | -4.0566450514 |
| H | -5.5380090583 | -5.6303373796 | -2.593646978  |
| H | -5.5790672716 | -4.649631309  | -5.4012864645 |
| H | -5.3898701734 | -2.0298928304 | -4.4009915414 |
| H | -5.4603959177 | -1.5092991115 | -2.1551302273 |
| H | -7.8894688279 | -7.7781902868 | -2.6458272152 |
| H | -9.1635822602 | -6.6392201434 | -2.2119989231 |
| H | -9.7970045373 | -2.9072057507 | -1.7337004903 |

|   |               |               |               |
|---|---------------|---------------|---------------|
| H | -9.6311081604 | -4.5952189117 | -1.2398275996 |
| H | -4.9218678523 | -3.4046172581 | -2.9675979725 |
| H | -6.6312832584 | -6.8174843829 | -1.0096937485 |
| H | -8.6626889604 | -3.8546846294 | 0.8141800902  |
| H | -9.9369783246 | -1.1933795024 | 2.4273173765  |
| H | -8.7790336245 | -2.5328005884 | 2.6045840454  |
| H | -8.2243451771 | -0.9076537854 | 2.1409648665  |

calc\_2c conf\_27

|   |               |               |               |
|---|---------------|---------------|---------------|
| C | -7.2008588926 | -2.5030069594 | -4.4603115548 |
| C | -7.4070558746 | -2.073860517  | -2.9831367209 |
| C | -7.827476514  | -3.3621275892 | -2.2474933869 |
| N | -7.8889448576 | -4.423055788  | -3.2791413662 |
| C | -7.0008813847 | -4.01437498   | -4.37468155   |
| C | -7.336334076  | -5.7368350046 | -2.8937220572 |
| C | -5.8122023073 | -5.555854574  | -2.8989040475 |
| C | -5.5694477278 | -4.524778127  | -4.009282437  |
| O | -6.128576156  | -1.8018776043 | -5.0629542399 |
| O | -6.240422206  | -1.4670677588 | -2.4707102551 |
| C | -7.9764604719 | -6.3079320999 | -1.6452472421 |
| C | -9.1747668386 | -3.2212670472 | -1.5298283472 |
| O | -4.7020492773 | -3.5056088844 | -3.521666832  |
| O | -9.3588334791 | -6.5341400658 | -1.8578895288 |
| N | -9.1280915978 | -2.2640916326 | -0.4458417354 |
| O | -8.0225703457 | -3.6648264599 | 0.9443399981  |
| C | -8.5106192404 | -2.5646844045 | 0.7297058796  |
| C | -8.4547471327 | -1.4470257521 | 1.7476666356  |
| H | -7.3187419787 | -4.5156709809 | -5.2959263857 |
| H | -8.1185190855 | -2.3095430624 | -5.0277732033 |
| H | -8.1781480166 | -1.3011068627 | -2.9130411482 |
| H | -7.0719743353 | -3.5686084192 | -1.4781228482 |
| H | -7.6043004582 | -6.4148763666 | -3.7164643877 |
| H | -5.2797947389 | -6.4949223996 | -3.0657784211 |
| H | -5.4550189104 | -5.1387706786 | -1.9515690279 |
| H | -5.105308885  | -4.9849327017 | -4.8899238202 |
| H | -5.8979967928 | -1.1136144656 | -4.4102904501 |
| H | -5.55370224   | -2.1668154467 | -2.4779374158 |
| H | -7.8118412015 | -5.6499166884 | -0.7804239667 |
| H | -7.5223688228 | -7.2763072579 | -1.4131122099 |
| H | -9.9409552803 | -2.9050659824 | -2.244371423  |
| H | -9.4815398236 | -4.1847969984 | -1.1170723057 |
| H | -4.6689427722 | -2.8565901565 | -4.2474168286 |
| H | -9.6488603293 | -5.850478103  | -2.4784195245 |
| H | -9.4331899852 | -1.3190915143 | -0.6096094302 |
| H | -8.6599150955 | -1.8646545113 | 2.7344259233  |
| H | -7.4416914647 | -1.0348704488 | 1.7669885713  |
| H | -9.1578514035 | -0.6349517064 | 1.5459370901  |

calc\_2c conf\_28

|   |               |               |               |
|---|---------------|---------------|---------------|
| C | -7.5915148903 | -2.2067132225 | -3.4149825542 |
| C | -6.7852825103 | -2.2475199764 | -2.0971949388 |
| C | -7.0690902395 | -3.6235063734 | -1.484979288  |
| N | -7.8839386933 | -4.3622661961 | -2.4820828106 |
| C | -7.7537357013 | -3.6876604332 | -3.7780962561 |
| C | -7.4903990143 | -5.7474099342 | -2.7750917167 |
| C | -6.2825418422 | -5.6371966859 | -3.7145512422 |
| C | -6.5669597823 | -4.371611561  | -4.5434629629 |

|   |                |               |               |
|---|----------------|---------------|---------------|
| O | -7.0018215686  | -1.3937673194 | -4.396320034  |
| O | -5.3899321209  | -2.1478484691 | -2.3745416534 |
| C | -7.291147552   | -6.6290957842 | -1.5574023984 |
| C | -7.8279658786  | -3.5314473222 | -0.1602068858 |
| O | -5.4221262862  | -3.5506548006 | -4.7276190434 |
| O | -7.0441105689  | -7.9321373297 | -2.0434541025 |
| N | -9.1403704687  | -2.966502192  | -0.3498708623 |
| O | -8.8101498635  | -1.1386724034 | 0.9568695652  |
| C | -9.5289244959  | -1.7887677087 | 0.212806846   |
| C | -10.9328890943 | -1.3390821405 | -0.1337574007 |
| H | -8.6697227618  | -3.8486201131 | -4.3579141411 |
| H | -8.5796936441  | -1.7892930812 | -3.1993760611 |
| H | -7.0710963004  | -1.4352962251 | -1.4199843907 |
| H | -6.0972744219  | -4.1015002266 | -1.2979343221 |
| H | -8.3245745658  | -6.1901330281 | -3.3361275715 |
| H | -6.1352529812  | -6.5310987447 | -4.3221140794 |
| H | -5.3622572138  | -5.4842488675 | -3.1371636736 |
| H | -6.8863390916  | -4.6244498989 | -5.556764329  |
| H | -6.3449477955  | -1.9613607093 | -4.8477979411 |
| H | -5.3024551538  | -1.333520497  | -2.8980952422 |
| H | -8.1961135126  | -6.5953630345 | -0.9325520419 |
| H | -6.4476020291  | -6.2675674736 | -0.9502872485 |
| H | -7.9148278704  | -4.5274894675 | 0.2896530833  |
| H | -7.2991569045  | -2.8882308928 | 0.546334432   |
| H | -5.1226107344  | -3.2701210097 | -3.837379719  |
| H | -6.876728137   | -8.507433224  | -1.2879023579 |
| H | -9.7207278607  | -3.4209879055 | -1.0383033048 |
| H | -11.4389767307 | -1.9829895694 | -0.8573509359 |
| H | -11.5255482403 | -1.3064300292 | 0.7839322588  |
| H | -10.8891934793 | -0.3210061497 | -0.5269346758 |

calc\_2c conf\_29

|   |                |               |               |
|---|----------------|---------------|---------------|
| C | -7.1711550698  | -2.3362184186 | -4.3944905008 |
| C | -6.8006562419  | -1.8612083848 | -2.9727408664 |
| C | -7.3905680147  | -2.9398968667 | -2.040532805  |
| N | -7.8044471361  | -4.0659415269 | -2.9116105386 |
| C | -7.2559015735  | -3.85856094   | -4.2577108433 |
| C | -7.3787331804  | -5.4346979675 | -2.5886591178 |
| C | -5.9322452417  | -5.5427336419 | -3.0935436337 |
| C | -5.9172128182  | -4.6665120222 | -4.3462448217 |
| O | -6.237820566   | -1.8828545157 | -5.3601837931 |
| O | -5.4093249799  | -1.6631705218 | -2.8602563276 |
| C | -7.5644544171  | -5.9096353724 | -1.1642524298 |
| C | -8.5864892032  | -2.3587653649 | -1.2825672868 |
| O | -4.7403250918  | -3.8678996548 | -4.3332246212 |
| O | -8.9490495416  | -6.1321384996 | -0.9308467215 |
| N | -9.199778925   | -3.2832874406 | -0.3656614581 |
| O | -9.1672033874  | -1.8621335813 | 1.4116656297  |
| C | -9.4502918357  | -2.94848445   | 0.9279090426  |
| C | -10.1126426384 | -4.0305853554 | 1.7584811387  |
| H | -7.9493875327  | -4.2806872608 | -4.9946768873 |
| H | -8.16622081    | -1.95928739   | -4.6571289925 |
| H | -7.2401143817  | -0.8827763302 | -2.7606783043 |
| H | -6.6149550426  | -3.2261932584 | -1.317539646  |
| H | -8.006929001   | -6.0939786427 | -3.2037238795 |
| H | -5.620917828   | -6.5726832152 | -3.2850523984 |
| H | -5.2328869085  | -5.1131301716 | -2.3663172149 |
| H | -5.9173396104  | -5.2747403963 | -5.2589719214 |

|   |                |               |               |
|---|----------------|---------------|---------------|
| H | -5.6496284274  | -1.2849565212 | -4.8628322637 |
| H | -4.97591898    | -2.5061993475 | -3.1159723802 |
| H | -7.1537295578  | -5.186706674  | -0.4470693904 |
| H | -7.0055975389  | -6.8480265465 | -1.0505869231 |
| H | -8.272094354   | -1.4977003926 | -0.687435318  |
| H | -9.322785239   | -2.0120389547 | -2.0212848088 |
| H | -4.8626847447  | -3.2394094689 | -5.0684537899 |
| H | -9.0388314178  | -6.5582745456 | -0.0692765104 |
| H | -9.4471265941  | -4.207072393  | -0.704694716  |
| H | -9.4470752746  | -4.3012943745 | 2.5825348419  |
| H | -11.0230807852 | -3.6213070019 | 2.2017979669  |
| H | -10.3693961093 | -4.926812589  | 1.1888324902  |

calc\_2c conf\_30

|   |                |               |               |
|---|----------------|---------------|---------------|
| C | -7.3809918266  | -2.0626296438 | -3.4377893032 |
| C | -6.5628873709  | -2.1131313231 | -2.1220634429 |
| C | -6.8187727086  | -3.520841033  | -1.5362567103 |
| N | -7.7709106746  | -4.1673339757 | -2.4551011196 |
| C | -7.6476077319  | -3.5310099205 | -3.7672587235 |
| C | -7.5687775561  | -5.5851321373 | -2.7482730618 |
| C | -6.4247239581  | -5.6370471639 | -3.7842668602 |
| C | -6.5381890807  | -4.305691528  | -4.5408587856 |
| O | -6.684625261   | -1.367357056  | -4.4611167639 |
| O | -5.1932918234  | -1.8603082803 | -2.3734616026 |
| C | -7.3657704583  | -6.4833135776 | -1.5418758206 |
| C | -7.322304903   | -3.5171533419 | -0.0695568137 |
| O | -5.2741356265  | -3.6516736043 | -4.525272813  |
| O | -8.4634163387  | -6.4830943647 | -0.6427332384 |
| N | -8.7538161112  | -3.5710927063 | 0.0834154073  |
| O | -9.0906564943  | -1.3892890084 | -0.4464357626 |
| C | -9.5390037381  | -2.5053543014 | -0.2110039051 |
| C | -11.0289465545 | -2.7764442775 | -0.2106050544 |
| H | -8.5914809601  | -3.6579215936 | -4.3126921315 |
| H | -8.3347585006  | -1.5640676802 | -3.2412073629 |
| H | -6.8938136298  | -1.3335573092 | -1.4375352597 |
| H | -5.8366563809  | -4.0214615216 | -1.5317890937 |
| H | -8.4896077581  | -5.9237980443 | -3.251591374  |
| H | -6.4887173958  | -6.5091271885 | -4.4397468727 |
| H | -5.4461359534  | -5.6660628335 | -3.2927551071 |
| H | -6.841841131   | -4.4597114749 | -5.583763247  |
| H | -5.95316832    | -0.9256668888 | -3.9897822927 |
| H | -4.8871893717  | -2.5965276179 | -2.9399810473 |
| H | -6.5000277489  | -6.1626160019 | -0.9574835641 |
| H | -7.1525301058  | -7.5025110818 | -1.8937329357 |
| H | -6.9202128924  | -4.3793336657 | 0.4676617492  |
| H | -6.9477105058  | -2.6206060086 | 0.4306968622  |
| H | -5.4661537645  | -2.779223621  | -4.9199516583 |
| H | -9.2261037365  | -6.8386168389 | -1.1171659434 |
| H | -9.1417015954  | -4.5006776291 | -0.0043476393 |
| H | -11.5314052988 | -1.9728025198 | 0.3305062703  |
| H | -11.3928750177 | -2.7550496637 | -1.2419649218 |
| H | -11.2960817162 | -3.7357635731 | 0.2391399437  |

calc\_2c conf\_31

|   |               |               |               |
|---|---------------|---------------|---------------|
| C | -7.4623705903 | -2.0697959916 | -3.3816244403 |
| C | -6.617381178  | -2.1942521192 | -2.095276824  |
| C | -6.8833055286 | -3.6083230216 | -1.5573032226 |

|   |                |               |               |
|---|----------------|---------------|---------------|
| N | -7.8061685918  | -4.2477798705 | -2.5243310932 |
| C | -7.6890918995  | -3.5261719117 | -3.7961776782 |
| C | -7.5015095532  | -5.6374202822 | -2.9094767818 |
| C | -6.2962511106  | -5.5467685347 | -3.8472530722 |
| C | -6.5389473571  | -4.2247812706 | -4.6105799138 |
| O | -6.8686819311  | -1.242165661  | -4.3521577918 |
| O | -5.2256165451  | -2.0939941635 | -2.4122111543 |
| C | -7.443256594   | -6.5458754203 | -1.6992617119 |
| C | -7.3768492621  | -3.6618907292 | -0.0902730426 |
| O | -5.3626631542  | -3.4510659664 | -4.7768580825 |
| O | -8.6356125171  | -6.3953261805 | -0.9512367369 |
| N | -8.8050405843  | -3.5975541545 | 0.1273549031  |
| O | -9.0549191796  | -1.4325277698 | -0.4805006075 |
| C | -9.5409671959  | -2.4734493983 | -0.0594218779 |
| C | -11.0114076884 | -2.5853343681 | 0.2811772495  |
| H | -8.6235245776  | -3.6379162384 | -4.3570014706 |
| H | -8.4213622419  | -1.6235378545 | -3.1109513168 |
| H | -6.8832190639  | -1.4233014537 | -1.3704675226 |
| H | -5.8999221654  | -4.1024585773 | -1.5454815786 |
| H | -8.3684768694  | -5.9671798655 | -3.5007054561 |
| H | -6.2031805082  | -6.4087505809 | -4.5122565513 |
| H | -5.3583287618  | -5.4672021259 | -3.2855268932 |
| H | -6.8838330405  | -4.4212972817 | -5.6283020835 |
| H | -6.2397590625  | -1.8103111042 | -4.8383246988 |
| H | -5.1530707073  | -1.2630718451 | -2.9120851204 |
| H | -6.5609655918  | -6.3158013185 | -1.0822848906 |
| H | -7.3547505667  | -7.591432234  | -2.0117883855 |
| H | -7.0513228634  | -4.5997913119 | 0.3621416805  |
| H | -6.8859704748  | -2.8484149805 | 0.4550963862  |
| H | -5.0568637077  | -3.1807025321 | -3.8835962159 |
| H | -8.9952221064  | -5.5386757464 | -1.2396654376 |
| H | -9.2439334364  | -4.4127377932 | 0.5239430905  |
| H | -11.5956052171 | -2.3962813378 | -0.6227313122 |
| H | -11.3006003429 | -3.555606958  | 0.6920710826  |
| H | -11.2640482334 | -1.8030520468 | 1.0003285728  |

calc\_2c conf\_32

|   |                |               |               |
|---|----------------|---------------|---------------|
| C | -7.1541395484  | -2.1317418374 | -4.0763696303 |
| C | -6.3604573686  | -1.7811091159 | -2.7733991931 |
| C | -6.909816687   | -2.7358227152 | -1.7033645708 |
| N | -7.1338897709  | -3.9085193476 | -2.5179300753 |
| C | -7.6972048592  | -3.5526248217 | -3.8023245325 |
| C | -7.5307168073  | -5.2627113356 | -2.207324096  |
| C | -7.4938488846  | -5.9131582312 | -3.6262467498 |
| C | -7.1853602651  | -4.7552804612 | -4.5981834772 |
| O | -6.3337175672  | -2.0028799143 | -5.2178579909 |
| O | -4.9984431894  | -2.0747489339 | -2.9805741545 |
| C | -6.6085153611  | -5.9550349914 | -1.2244176892 |
| C | -8.1403240766  | -2.1588218122 | -0.9973887453 |
| O | -5.7821579679  | -4.6108210463 | -4.8040437276 |
| O | -6.7990532604  | -5.3869819323 | 0.0653268115  |
| N | -8.6854881142  | -3.113928993  | -0.0616822483 |
| O | -10.768759137  | -2.2236970786 | -0.0858226743 |
| C | -9.9897816201  | -3.0779077717 | 0.3124913069  |
| C | -10.4143338374 | -4.1714102591 | 1.2726496389  |
| H | -8.802527378   | -3.5483922025 | -3.8080158804 |
| H | -7.9844306913  | -1.4336215085 | -4.206705072  |
| H | -6.4900163312  | -0.7273331941 | -2.4904128663 |



|   |                |               |               |
|---|----------------|---------------|---------------|
| H | -6.1299374672  | -2.9405847456 | -0.9635842952 |
| H | -8.5556495089  | -5.3188041554 | -1.8042891699 |
| H | -8.4523585813  | -6.3836758991 | -3.8606071974 |
| H | -6.7154321191  | -6.6765562409 | -3.7180736167 |
| H | -7.6340403415  | -4.8882931799 | -5.58323868   |
| H | -5.9523584804  | -2.8896475321 | -5.3822176849 |
| H | -4.8329128519  | -1.7816589626 | -3.8944935298 |
| H | -5.5696374292  | -5.8318899938 | -1.5597081232 |
| H | -6.8437516172  | -7.0284074515 | -1.2069845202 |
| H | -7.8559553759  | -1.2275457496 | -0.4872883164 |
| H | -8.9310272423  | -1.8940396783 | -1.7075772898 |
| H | -5.44618075    | -4.3117109508 | -3.9343676281 |
| H | -6.1398085247  | -5.7527683173 | 0.6668249835  |
| H | -8.0829081806  | -3.8634142766 | 0.2559483978  |
| H | -9.6643427572  | -4.9567817117 | 1.3959456949  |
| H | -10.6245239641 | -3.7262615363 | 2.2491282563  |
| H | -11.3451920859 | -4.6124121147 | 0.9101783358  |

calc\_2c conf\_33

|   |                |               |               |
|---|----------------|---------------|---------------|
| C | -7.4618764893  | -2.1573976316 | -3.3468940611 |
| C | -6.7068490579  | -2.3092936793 | -2.002853161  |
| C | -7.0630026165  | -3.724757727  | -1.5021624839 |
| N | -7.9203602384  | -4.3299133482 | -2.5470054856 |
| C | -7.7065601589  | -3.5985358308 | -3.8004974616 |
| C | -7.6572621947  | -5.7263750109 | -2.9156702235 |
| C | -6.4376077381  | -5.6778404867 | -3.8559639214 |
| C | -6.5489895635  | -4.319438178  | -4.5588436606 |
| O | -6.7306367661  | -1.3754666009 | -4.2747041453 |
| O | -5.3225864989  | -2.0996046404 | -2.1843589198 |
| C | -7.5321147493  | -6.7008195259 | -1.7520227477 |
| C | -7.8053334087  | -3.6962656302 | -0.1644380845 |
| O | -5.2965438543  | -3.6489377073 | -4.4712820854 |
| O | -7.4141899849  | -8.0308822197 | -2.2109572018 |
| N | -9.0923224787  | -3.0623654045 | -0.3032856155 |
| O | -8.6948019171  | -1.3715301719 | 1.1599653294  |
| C | -9.437616329   | -1.9272871708 | 0.3651605047  |
| C | -10.8276355621 | -1.4025908667 | 0.0705993069  |
| H | -8.6112163564  | -3.6769142661 | -4.4152014958 |
| H | -8.4327745169  | -1.6832010514 | -3.1633295911 |
| H | -7.0207711626  | -1.5480396005 | -1.2855141818 |
| H | -6.1168289046  | -4.2679400696 | -1.3632965597 |
| H | -8.5249161347  | -6.0603187121 | -3.5000509075 |
| H | -6.4091656279  | -6.515286777  | -4.5569706198 |
| H | -5.5000070432  | -5.6841259857 | -3.2861787023 |
| H | -6.8118791914  | -4.4331665385 | -5.6172651662 |
| H | -6.0007308498  | -1.0001674656 | -3.7471919296 |
| H | -5.0229926303  | -2.7880981278 | -2.814243398  |
| H | -8.4402957915  | -6.669704534  | -1.144653478  |
| H | -6.68712389    | -6.4313572321 | -1.1013824925 |
| H | -7.9311130701  | -4.7144618236 | 0.2218590696  |
| H | -7.2419386333  | -3.1245014862 | 0.576159377   |
| H | -5.4774332178  | -2.7633840141 | -4.8377484612 |
| H | -6.537830697   | -8.1316789214 | -2.602327389  |
| H | -9.6923526833  | -3.4336745257 | -1.0238731712 |
| H | -10.757146648  | -0.3429931888 | -0.1837348348 |
| H | -11.3407251484 | -1.9341748173 | -0.734803491  |
| H | -11.4294681967 | -1.4785090318 | 0.9799615407  |

calc\_2c conf\_34

|   |                |               |               |
|---|----------------|---------------|---------------|
| C | -6.9800979585  | -2.0270218101 | -3.944401896  |
| C | -6.2396115153  | -1.7884313567 | -2.5900160104 |
| C | -6.9188754728  | -2.7495068724 | -1.599476938  |
| N | -7.0145458077  | -3.8905828596 | -2.4916618782 |
| C | -7.5683131966  | -3.4452039842 | -3.7576343269 |
| C | -7.5015708954  | -5.234414937  | -2.2717689099 |
| C | -7.4142461904  | -5.8241959819 | -3.70798076   |
| C | -7.2031811268  | -4.6264746998 | -4.6609285118 |
| O | -6.079429313   | -1.8837456473 | -5.0269819159 |
| O | -4.8852154066  | -2.1694705708 | -2.7677737951 |
| C | -6.6889208679  | -6.0158271669 | -1.263070739  |
| C | -8.2229260338  | -2.2075459862 | -1.0141617298 |
| O | -5.846301993   | -4.5980072145 | -5.0436615443 |
| O | -6.9296252882  | -5.4759918404 | 0.0319893724  |
| N | -8.7915461927  | -3.1642690745 | -0.0929175203 |
| O | -10.7823784544 | -2.0979624967 | 0.0236602807  |
| C | -10.0638112421 | -3.0287105033 | 0.358802966   |
| C | -10.5295284025 | -4.1074777651 | 1.3157844031  |
| H | -8.6723487794  | -3.3752010245 | -3.7178208726 |
| H | -7.7867083472  | -1.3021670893 | -4.0857688757 |
| H | -6.2344695385  | -0.7435871905 | -2.2749434405 |
| H | -6.2260128105  | -2.9691960209 | -0.7812113724 |
| H | -8.5531936108  | -5.2392065989 | -1.9378787629 |
| H | -8.318744188   | -6.3860334993 | -3.9516584654 |
| H | -6.558574669   | -6.4963872164 | -3.8197370195 |
| H | -7.8565037836  | -4.6881139288 | -5.5411805297 |
| H | -5.2052425966  | -1.8112626499 | -4.5939842456 |
| H | -4.9322497754  | -3.1396814802 | -2.881256031  |
| H | -5.6259989946  | -5.9441792525 | -1.5295217525 |
| H | -6.9875908573  | -7.072659298  | -1.2991068223 |
| H | -8.0205723525  | -1.2554445383 | -0.5042125783 |
| H | -8.9614890307  | -1.9871720753 | -1.7924480413 |
| H | -5.7266858784  | -3.7219979764 | -5.4524470349 |
| H | -6.3599369877  | -5.9245850951 | 0.6678735295  |
| H | -8.2221990775  | -3.9527286756 | 0.1910939401  |
| H | -10.6737892361 | -3.6663030619 | 2.3058265998  |
| H | -11.5009256187 | -4.4770405144 | 0.9807177772  |
| H | -9.8326385099  | -4.9452120463 | 1.3988634517  |

calc\_2c conf\_35

|   |               |               |               |
|---|---------------|---------------|---------------|
| C | -7.3759240601 | -2.0810828614 | -3.4076500372 |
| C | -6.5893505623 | -2.1851707302 | -2.0788653248 |
| C | -6.8630108014 | -3.6175928102 | -1.5624825904 |
| N | -7.7790486672 | -4.2388599023 | -2.5413913356 |
| C | -7.6042579231 | -3.5345489384 | -3.8184454502 |
| C | -7.5123654399 | -5.6383875575 | -2.9143628624 |
| C | -6.2869914938 | -5.5974708443 | -3.8353936388 |
| C | -6.4395103611 | -4.2568640349 | -4.5724404865 |
| O | -6.6730842985 | -1.318314842  | -4.3771295605 |
| O | -5.2144900407 | -1.9227975057 | -2.2809989783 |
| C | -7.496274876  | -6.5483498043 | -1.7046483459 |
| C | -7.363593603  | -3.679138442  | -0.0984280595 |
| O | -5.2036331616 | -3.5552164519 | -4.5254282523 |
| O | -8.6981415251 | -6.3767764198 | -0.9772083692 |
| N | -8.7933564096 | -3.6077658565 | 0.1141651024  |
| O | -9.0492027633 | -1.4398412136 | -0.4898949867 |

|   |                |               |               |
|---|----------------|---------------|---------------|
| C | -9.5295327444  | -2.4827829337 | -0.0677635117 |
| C | -10.9977891803 | -2.5953545736 | 0.2834811101  |
| H | -8.5185428031  | -3.6493986102 | -4.412134999  |
| H | -8.3448667352  | -1.6143508514 | -3.2071414777 |
| H | -6.9396373759  | -1.4370746557 | -1.3701949905 |
| H | -5.8811501695  | -4.1158518935 | -1.5483187444 |
| H | -8.3797476056  | -5.943628789  | -3.5179613929 |
| H | -6.2388059699  | -6.4538912956 | -4.5118602963 |
| H | -5.3526955977  | -5.5736452699 | -3.2646874419 |
| H | -6.7179059599  | -4.4088653345 | -5.622613526  |
| H | -5.9618572191  | -0.8859636969 | -3.8688705826 |
| H | -4.8951491785  | -2.613343118  | -2.8973596438 |
| H | -6.619983808   | -6.3378467633 | -1.0724129276 |
| H | -7.4238571802  | -7.594951343  | -2.0180610788 |
| H | -7.0457242192  | -4.6202084599 | 0.3531500351  |
| H | -6.869146689   | -2.8712496567 | 0.4524270604  |
| H | -5.4219954222  | -2.6773957539 | -4.8936419444 |
| H | -9.0328527558  | -5.5089014506 | -1.2610212141 |
| H | -9.2331216269  | -4.4203171561 | 0.5152560843  |
| H | -11.5888876961 | -2.3759055977 | -0.6088257156 |
| H | -11.2903771694 | -3.5746454519 | 0.6698636482  |
| H | -11.2381369076 | -1.83224913   | 1.0272947254  |

calc\_2c conf\_36

|   |                |               |               |
|---|----------------|---------------|---------------|
| C | -7.2108539764  | -2.31735667   | -4.3714986137 |
| C | -6.719121814   | -1.8840660861 | -2.9715899347 |
| C | -7.2685248328  | -2.9563582546 | -2.0054586046 |
| N | -7.8943099172  | -3.9960886462 | -2.8554923028 |
| C | -7.4209932338  | -3.824221727  | -4.2331736691 |
| C | -7.6181405587  | -5.4129819806 | -2.5990123425 |
| C | -6.2256988638  | -5.6756811516 | -3.2000087799 |
| C | -6.1690482668  | -4.7446079037 | -4.4140439515 |
| O | -6.2925667825  | -1.9470788267 | -5.3867635416 |
| O | -5.314001351   | -1.7477559057 | -2.9565640671 |
| C | -7.8509788646  | -5.9401068229 | -1.1936600362 |
| C | -8.2585638769  | -2.310276213  | -1.0331696447 |
| O | -4.9265697816  | -4.0507929278 | -4.4093576408 |
| O | -6.9595936921  | -5.4649032911 | -0.1965125568 |
| N | -8.690388908   | -3.19210413   | 0.0214410084  |
| O | -10.7671449995 | -2.2935592273 | 0.2009898596  |
| C | -9.92686524    | -3.0962429241 | 0.5784496405  |
| C | -10.1975974147 | -4.0650146517 | 1.712853202   |
| H | -8.1971108105  | -4.180281382  | -4.921614731  |
| H | -8.1802510499  | -1.8505222784 | -4.5779206854 |
| H | -7.0988399145  | -0.891044498  | -2.7180332818 |
| H | -6.420022012   | -3.3488231361 | -1.4297394046 |
| H | -8.3477819744  | -5.9610357696 | -3.2148175746 |
| H | -6.0563376871  | -6.7256363597 | -3.4532279384 |
| H | -5.4326980937  | -5.3645239246 | -2.5094495926 |
| H | -6.2534418689  | -5.3047495143 | -5.3532181507 |
| H | -5.6475719353  | -1.3760382924 | -4.9296345689 |
| H | -4.9497658093  | -2.6241195825 | -3.2046172363 |
| H | -7.8252794131  | -7.037783246  | -1.2314666504 |
| H | -8.8468369045  | -5.6392446457 | -0.8663935755 |
| H | -7.7787257969  | -1.4177612944 | -0.6053463492 |
| H | -9.1516131118  | -1.9782234154 | -1.5684871216 |
| H | -5.0178668793  | -3.3966070191 | -5.1271271862 |
| H | -6.0791172847  | -5.8186873865 | -0.3717634559 |

|   |                |               |              |
|---|----------------|---------------|--------------|
| H | -8.0094279551  | -3.8367464132 | 0.3998771212 |
| H | -11.1291330539 | -4.596022755  | 1.5044608094 |
| H | -9.3959548013  | -4.7906273657 | 1.8729445786 |
| H | -10.3492612694 | -3.4963243813 | 2.6341469693 |

calc\_2c conf\_37

|   |                |               |               |
|---|----------------|---------------|---------------|
| C | -7.2611510423  | -2.4007147704 | -4.256152297  |
| C | -7.2781414032  | -2.1372810516 | -2.7276263942 |
| C | -7.586022363   | -3.5071014047 | -2.0829893357 |
| N | -7.8360563515  | -4.4346717795 | -3.2040631002 |
| C | -7.0943489522  | -3.9132146201 | -4.3618246421 |
| C | -7.2799577245  | -5.7954519722 | -3.0652668001 |
| C | -5.7652493112  | -5.646727364  | -3.2809579678 |
| C | -5.639962414   | -4.4663251797 | -4.2525707235 |
| O | -6.2444018934  | -1.6627292984 | -4.9110267949 |
| O | -6.0622599087  | -1.5730203982 | -2.28092456   |
| C | -7.7221298923  | -6.5078114528 | -1.804018404  |
| C | -8.7698305778  | -3.4196928763 | -1.1268059857 |
| O | -4.7097459141  | -3.522584272  | -3.7257191301 |
| O | -9.1177621299  | -6.6981790972 | -1.7775645105 |
| N | -8.4467737092  | -2.5029586781 | -0.0536642003 |
| O | -10.4498702057 | -2.7541666634 | 0.9536968581  |
| C | -9.3476715141  | -2.2308146456 | 0.9287022025  |
| C | -8.8926583798  | -1.2466281344 | 1.9857874205  |
| H | -7.5462826367  | -4.3094663525 | -5.2779156023 |
| H | -8.2340844854  | -2.1270660366 | -4.679322161  |
| H | -8.044215677   | -1.4005134052 | -2.4740535996 |
| H | -6.695138248   | -3.7962525255 | -1.5013439237 |
| H | -7.6970021342  | -6.3651552354 | -3.9066026164 |
| H | -5.3074279851  | -6.5626933039 | -3.6610621205 |
| H | -5.2499816295  | -5.3843786213 | -2.3505918158 |
| H | -5.2872383093  | -4.7899011225 | -5.2387473496 |
| H | -5.9672279003  | -0.9912942551 | -4.2620123076 |
| H | -5.3815349581  | -2.2561200873 | -2.4575758179 |
| H | -7.3713144973  | -5.9607465481 | -0.914373739  |
| H | -7.262499079   | -7.5001190597 | -1.7680450568 |
| H | -9.6541844511  | -3.0678745051 | -1.6724957194 |
| H | -9.026564362   | -4.3970512523 | -0.7071729253 |
| H | -4.7420319237  | -2.7855525055 | -4.3630372399 |
| H | -9.5145709518  | -5.9116767785 | -2.17776821   |
| H | -7.5565032427  | -2.0291794015 | -0.0717363717 |
| H | -8.9192634718  | -1.7414013013 | 2.9596674974  |
| H | -7.8891551748  | -0.8472680263 | 1.8185692181  |
| H | -9.603785195   | -0.4182160177 | 2.023608226   |

calc\_2c conf\_38

|   |               |               |               |
|---|---------------|---------------|---------------|
| C | -7.2258213663 | -2.3167433429 | -4.3449165361 |
| C | -7.4405085771 | -1.9375880939 | -2.8558954756 |
| C | -7.9877650848 | -3.2182464903 | -2.1954582757 |
| N | -8.0515404087 | -4.2366585298 | -3.2602985626 |
| C | -7.1187755354 | -3.8416364438 | -4.3197316378 |
| C | -7.598439464  | -5.5884097782 | -2.9032190109 |
| C | -6.0615287267 | -5.5190350397 | -2.9035407971 |
| C | -5.7312618808 | -4.4607067057 | -3.9610537919 |
| O | -6.1014366004 | -1.6540181168 | -4.8934326343 |
| O | -6.240627555  | -1.4581024809 | -2.2872563773 |
| C | -8.2146701414 | -6.158422364  | -1.6398521507 |

|   |                |               |               |
|---|----------------|---------------|---------------|
| C | -9.3757621471  | -3.0242745429 | -1.5754859129 |
| O | -4.8097221243  | -3.5196423096 | -3.4109041199 |
| O | -7.6829332168  | -7.4622700145 | -1.4883397063 |
| N | -9.3604374629  | -2.159654707  | -0.4150964013 |
| O | -8.6657774234  | -3.7919605945 | 0.9916725321  |
| C | -8.957182576   | -2.6192628906 | 0.8003554859  |
| C | -8.8909160241  | -1.5877422503 | 1.9050904587  |
| H | -7.4523751781  | -4.2810448758 | -5.2673402346 |
| H | -8.1167428953  | -2.0442454317 | -4.9225208766 |
| H | -8.1447495005  | -1.1045683126 | -2.7686209891 |
| H | -7.2985030992  | -3.4904031131 | -1.3838087046 |
| H | -7.9124165943  | -6.2421897886 | -3.728239654  |
| H | -5.6016107291  | -6.48846517   | -3.0978024941 |
| H | -5.6874353887  | -5.1690429334 | -1.9352669893 |
| H | -5.2786122843  | -4.9052223229 | -4.8553421137 |
| H | -5.8301658371  | -1.02990395   | -4.1936932871 |
| H | -5.6083571811  | -2.2078833754 | -2.3318094509 |
| H | -9.3089845343  | -6.1885112094 | -1.7536290058 |
| H | -7.9869442593  | -5.5302369059 | -0.7691750238 |
| H | -10.0587674484 | -2.608574779  | -2.3219769966 |
| H | -9.7772742844  | -3.9899341278 | -1.2651365453 |
| H | -4.7137598881  | -2.8475147181 | -4.1089635365 |
| H | -7.9341624313  | -7.7785635918 | -0.6129116504 |
| H | -9.4928549596  | -1.1695094474 | -0.5397634566 |
| H | -9.3605847852  | -0.6352197993 | 1.6475005883  |
| H | -9.3733921826  | -1.9971107298 | 2.7944356151  |
| H | -7.842200224   | -1.4054807231 | 2.1554277192  |

calc\_2c conf\_39

|   |               |               |               |
|---|---------------|---------------|---------------|
| C | -6.5273232674 | -2.382541197  | -3.9497267023 |
| C | -7.5761404072 | -1.902439148  | -2.9532343645 |
| C | -7.8981900546 | -3.1888726589 | -2.1735782395 |
| N | -7.9393241204 | -4.2028635096 | -3.2276192539 |
| C | -7.0979960064 | -3.7446845481 | -4.3625767013 |
| C | -7.5151851222 | -5.5788080855 | -2.9185506667 |
| C | -6.034030086  | -5.6292233053 | -3.2974398796 |
| C | -6.0554776041 | -4.8608245318 | -4.6126757917 |
| O | -5.3280782715 | -2.4539527304 | -3.201459741  |
| O | -7.1356185209 | -0.8330588007 | -2.1527850744 |
| C | -7.8295178802 | -6.067834899  | -1.5168513428 |
| C | -9.2131280932 | -3.0769261386 | -1.4052315357 |
| O | -4.8158925386 | -4.2910968216 | -5.0280988401 |
| O | -7.3539715802 | -7.3986099169 | -1.4467393527 |
| N | -9.1170922139 | -2.0646136373 | -0.3777021918 |
| O | -9.9504263502 | -3.3709461145 | 1.2842635222  |
| C | -9.4644634184 | -2.3115752641 | 0.9126213798  |
| C | -9.2270708917 | -1.1658159271 | 1.8751124125  |
| H | -7.7154824432 | -3.6046478264 | -5.2585390638 |
| H | -6.4087277181 | -1.7093852383 | -4.8077524305 |
| H | -8.4723991399 | -1.5623204862 | -3.4832281168 |
| H | -7.0772481782 | -3.3420737842 | -1.4541715954 |
| H | -8.0596647874 | -6.249446276  | -3.599593393  |
| H | -5.649079345  | -6.6480509542 | -3.3833420319 |
| H | -5.4380111431 | -5.0787429523 | -2.5606087383 |
| H | -6.4222734512 | -5.5191558181 | -5.4115127705 |
| H | -4.7014432243 | -2.954860694  | -3.7530799191 |
| H | -6.2020992084 | -1.0291563475 | -1.9678482749 |
| H | -8.9132782854 | -6.0255548491 | -1.3464091553 |

|   |                |               |               |
|---|----------------|---------------|---------------|
| H | -7.3426989676  | -5.4336184477 | -0.7630508753 |
| H | -10.0186223743 | -2.8496592539 | -2.1162936669 |
| H | -9.4794601514  | -4.0048583162 | -0.8979231697 |
| H | -4.1830085464  | -5.0109363469 | -5.1437818024 |
| H | -7.5801291147  | -7.7439832624 | -0.5751355218 |
| H | -8.6123953324  | -1.2205681534 | -0.6130018939 |
| H | -8.726239764   | -0.3058499075 | 1.4237282846  |
| H | -10.1899573687 | -0.8414126658 | 2.2780115435  |
| H | -8.6308550293  | -1.5300311859 | 2.7148049549  |

calc\_2c conf\_40

|   |               |               |               |
|---|---------------|---------------|---------------|
| C | -7.349733894  | -2.2651927463 | -3.9184157945 |
| C | -7.1616530817 | -2.2221266465 | -2.38540561   |
| C | -7.7108963462 | -3.5592188792 | -1.8783430779 |
| N | -8.0045112209 | -4.3748685853 | -3.0769021314 |
| C | -7.3501037744 | -3.7653938873 | -4.2352207281 |
| C | -7.5334092363 | -5.7634488105 | -3.0923202298 |
| C | -6.04153011   | -5.6742936778 | -3.4519422121 |
| C | -5.9553265133 | -4.4653627834 | -4.4035639354 |
| O | -6.4026363815 | -1.4888452232 | -4.6080947237 |
| O | -5.7710635305 | -2.1355116523 | -2.0669326608 |
| C | -7.8550370269 | -6.5763173434 | -1.8456459187 |
| C | -8.9963700942 | -3.3974308404 | -1.0574516773 |
| O | -4.8304508832 | -3.6381341509 | -4.149115957  |
| O | -7.4794264063 | -7.9285856531 | -1.9975509547 |
| N | -8.7932251833 | -2.7301184878 | 0.2086039977  |
| O | -9.5626708037 | -0.7054517434 | -0.4681015374 |
| C | -9.1093755458 | -1.4206437427 | 0.4130733496  |
| C | -8.8634161073 | -0.901439954  | 1.813566354   |
| H | -7.9438555503 | -3.9725191179 | -5.132813357  |
| H | -8.3366639385 | -1.8580362956 | -4.1565145124 |
| H | -7.6840074538 | -1.3705520609 | -1.9401293565 |
| H | -6.9338344647 | -4.0060227996 | -1.2400895677 |
| H | -8.0568391643 | -6.2593458513 | -3.9208564394 |
| H | -5.6431943515 | -6.5884610964 | -3.8998925319 |
| H | -5.4434069347 | -5.4543791536 | -2.5571852116 |
| H | -5.8314569881 | -4.7876554508 | -5.4396761101 |
| H | -5.6221516637 | -2.0650970537 | -4.7273740651 |
| H | -5.4642689834 | -1.3454159316 | -2.5429316123 |
| H | -8.935286975  | -6.5811385759 | -1.6795849839 |
| H | -7.3814549816 | -6.1351342745 | -0.9552720967 |
| H | -9.7182939604 | -2.8064440438 | -1.6241816716 |
| H | -9.4415378403 | -4.3809222817 | -0.8798604354 |
| H | -4.9348948331 | -3.291563618  | -3.2371794112 |
| H | -6.5155205174 | -7.9634897529 | -2.0319330512 |
| H | -8.396049321  | -3.2545271423 | 0.9710439263  |
| H | -9.8032434517 | -0.5104733858 | 2.2101657331  |
| H | -8.4706392477 | -1.6515006701 | 2.5044968828  |
| H | -8.1615632393 | -0.0659366362 | 1.7595313193  |

calc\_2c conf\_41

|   |               |               |               |
|---|---------------|---------------|---------------|
| C | -6.4019146377 | -2.4279168373 | -3.9246330969 |
| C | -7.3707830018 | -1.9169050618 | -2.8652997495 |
| C | -7.7887232369 | -3.2118545855 | -2.1445293394 |
| N | -7.9292561399 | -4.1673891197 | -3.244970153  |
| C | -7.1047203391 | -3.7076676673 | -4.3904361466 |
| C | -7.5967372671 | -5.5838582296 | -3.0192538223 |

|   |                |               |               |
|---|----------------|---------------|---------------|
| C | -6.1494641137  | -5.7297930047 | -3.492426236  |
| C | -6.1723188641  | -4.8852105182 | -4.7592154767 |
| O | -5.1907653503  | -2.6506489284 | -3.2273897778 |
| O | -6.80834341    | -0.9415228786 | -2.0222268515 |
| C | -7.8533554733  | -6.126826541  | -1.6179062628 |
| C | -9.0809088297  | -3.0289607947 | -1.3526048661 |
| O | -4.9114595165  | -4.3898948621 | -5.2032438631 |
| O | -7.4844176522  | -7.4897457175 | -1.5366999248 |
| N | -8.8933507661  | -2.051337277  | -0.3044737327 |
| O | -10.145960889  | -3.1570190027 | 1.2308925972  |
| C | -9.4340044356  | -2.2089140173 | 0.9314595435  |
| C | -9.0964341989  | -1.1198700297 | 1.9294327586  |
| H | -7.7468681634  | -3.4586769376 | -5.2447214153 |
| H | -6.2508493636  | -1.7182111749 | -4.7472562222 |
| H | -8.2470377399  | -1.4651664716 | -3.3426924619 |
| H | -6.9739698066  | -3.4689061169 | -1.4486932563 |
| H | -8.2342109597  | -6.1734338445 | -3.7008236145 |
| H | -5.8514102764  | -6.7687188331 | -3.653289895  |
| H | -5.472863322   | -5.2723211837 | -2.7618861793 |
| H | -6.6295053313  | -5.4615289901 | -5.5749378586 |
| H | -4.6238869094  | -3.1541368257 | -3.8375880585 |
| H | -5.8909561246  | -1.2302176263 | -1.8836254005 |
| H | -8.9042107417  | -5.983393384  | -1.3374989624 |
| H | -7.2386146981  | -5.6086560596 | -0.8782802765 |
| H | -9.8776060158  | -2.7289445387 | -2.0473542778 |
| H | -9.4086815393  | -3.950135844  | -0.8681844981 |
| H | -4.3456862109  | -5.1481192981 | -5.3958605814 |
| H | -8.1405360744  | -7.9997856181 | -2.0278578906 |
| H | -8.2655001999  | -1.2823143002 | -0.4974060465 |
| H | -10.0262556787 | -0.6684099511 | 2.2837347535  |
| H | -8.6078669867  | -1.5755481942 | 2.7941389019  |
| H | -8.4515657357  | -0.3350397342 | 1.5266076397  |

calc\_2c conf\_42

|   |               |               |               |
|---|---------------|---------------|---------------|
| C | -6.7431511087 | -2.2700889027 | -3.7552381991 |
| C | -7.7155552337 | -2.0052957416 | -2.5810010318 |
| C | -7.9674865523 | -3.3918187916 | -1.9699500791 |
| N | -7.9162103803 | -4.2747839699 | -3.1223243525 |
| C | -7.0947155601 | -3.6950610579 | -4.1983048678 |
| C | -7.6508554361 | -5.7143230621 | -3.0022552688 |
| C | -6.7802645073 | -6.0230753348 | -4.2357301275 |
| C | -5.9926077929 | -4.7358901413 | -4.4611021582 |
| O | -5.4164562237 | -2.1351109155 | -3.2861112249 |
| O | -7.1218123182 | -1.0776168936 | -1.7025071575 |
| C | -6.9683904191 | -6.1689410093 | -1.7050966335 |
| C | -9.3453022351 | -3.5387160398 | -1.3039600827 |
| O | -4.9426937812 | -4.7105206721 | -3.5253598838 |
| O | -6.84048413   | -7.5770386845 | -1.6722361124 |
| N | -9.7831959068 | -2.4780936623 | -0.4021826998 |
| O | -7.8443836495 | -2.1270672188 | 0.7174987965  |
| C | -9.0530109868 | -1.9218514708 | 0.5859056417  |
| C | -9.7885821045 | -0.9902820469 | 1.5200725997  |
| H | -7.6949765518 | -3.626893467  | -5.1187926765 |
| H | -6.9015144668 | -1.553933753  | -4.5707537994 |
| H | -8.6579131482 | -1.5986978794 | -2.9725454009 |
| H | -7.1768513285 | -3.5889040137 | -1.2336977615 |
| H | -8.6020087116 | -6.2695253073 | -3.0716433699 |
| H | -7.4073596305 | -6.2378843023 | -5.1074364467 |

|   |                |               |               |
|---|----------------|---------------|---------------|
| H | -6.1241440264  | -6.8777597844 | -4.0600348689 |
| H | -5.6109856089  | -4.6545804597 | -5.4900410377 |
| H | -5.5044444627  | -1.5548170548 | -2.5024974875 |
| H | -7.1926078042  | -1.4268621672 | -0.7895896455 |
| H | -7.5228265217  | -5.8120044227 | -0.8234200162 |
| H | -5.9561922687  | -5.767516531  | -1.6621110324 |
| H | -10.0770586039 | -3.5831934381 | -2.1140673778 |
| H | -9.3842465638  | -4.4991282207 | -0.7748533884 |
| H | -4.7583801458  | -3.7704593293 | -3.3448034462 |
| H | -7.7301844592  | -7.951766971  | -1.7060624621 |
| H | -10.7675835152 | -2.2643571107 | -0.4203300967 |
| H | -9.6375205328  | -1.3392782114 | 2.5441365836  |
| H | -9.3406928468  | 0.0036585188  | 1.4468862438  |
| H | -10.8603503118 | -0.9135204795 | 1.3235403283  |

calc\_2c conf\_43

|   |               |               |               |
|---|---------------|---------------|---------------|
| C | -7.2202292355 | -2.2259283371 | -3.7564117622 |
| C | -7.1241717724 | -2.2907843261 | -2.2116257614 |
| C | -7.7234569472 | -3.6644254383 | -1.8422717694 |
| N | -8.024357911  | -4.3479025894 | -3.1156167363 |
| C | -7.268919727  | -3.6929990511 | -4.1881393013 |
| C | -7.6433848472 | -5.758102241  | -3.2404766526 |
| C | -6.1363628772 | -5.7547123129 | -3.5461371778 |
| C | -5.9122903797 | -4.4541594544 | -4.3248533255 |
| O | -6.1448564947 | -1.4910218044 | -4.31611144   |
| O | -5.7874335374 | -2.1126493135 | -1.7901615231 |
| C | -8.060602245  | -6.653884458  | -2.0828976358 |
| C | -9.0094899875 | -3.5396003848 | -1.0163638738 |
| O | -4.8019452259 | -3.762043974  | -3.7620524115 |
| O | -7.670479328  | -7.9938449303 | -2.2984294848 |
| N | -8.8002006738 | -2.9440706271 | 0.2835485317  |
| O | -9.6106525305 | -0.8980678383 | -0.2708323742 |
| C | -9.1205970233 | -1.6487282571 | 0.5599889927  |
| C | -8.8230228281 | -1.1910756147 | 1.9714997419  |
| H | -7.818273961  | -3.8116562121 | -5.1300110107 |
| H | -8.1650139649 | -1.7498773741 | -4.0410040953 |
| H | -7.6872084298 | -1.4765615094 | -1.7523888116 |
| H | -6.9651325532 | -4.1936515106 | -1.2439943747 |
| H | -8.1723813321 | -6.1287638578 | -4.1337069704 |
| H | -5.8086006555 | -6.6465755374 | -4.0823708346 |
| H | -5.5564358261 | -5.7037895991 | -2.6176477788 |
| H | -5.7014994457 | -4.6473018958 | -5.3837779442 |
| H | -5.7005794632 | -1.0940688626 | -3.5438116466 |
| H | -5.2687350322 | -2.8316519373 | -2.2102605112 |
| H | -9.1449008343 | -6.5711780087 | -1.9194212788 |
| H | -7.5597513493 | -6.3524039624 | -1.1586342302 |
| H | -9.7202371162 | -2.9054266647 | -1.5494212855 |
| H | -9.4716930924 | -4.5238947383 | -0.8930604236 |
| H | -4.7986740976 | -2.9037168349 | -4.2249323947 |
| H | -8.1671335402 | -8.3250745174 | -3.0573878506 |
| H | -8.3539261578 | -3.4934938568 | 0.999983865   |
| H | -8.0501946944 | -0.4190759939 | 1.9339940185  |
| H | -9.7228474488 | -0.7317105813 | 2.3856836831  |
| H | -8.490327434  | -1.9911255928 | 2.6375138381  |

calc\_2c conf\_44

|   |               |              |               |
|---|---------------|--------------|---------------|
| C | -7.4105200644 | -2.272158779 | -4.2110713398 |
|---|---------------|--------------|---------------|



|   |                |               |               |
|---|----------------|---------------|---------------|
| C | -7.5969405271  | -2.0264583443 | -2.695966258  |
| C | -8.0907706636  | -3.3827112286 | -2.1362154037 |
| N | -8.0671470348  | -4.3356180886 | -3.2681934239 |
| C | -7.1819574344  | -3.7815253161 | -4.297686964  |
| C | -7.4644019342  | -5.6446586406 | -2.9761997879 |
| C | -5.9472964955  | -5.4015843126 | -2.9541325901 |
| C | -5.728895226   | -4.2851553465 | -3.9974408394 |
| O | -6.4645376632  | -1.4790375848 | -4.8555795252 |
| O | -6.364379664   | -1.6581564095 | -2.1066797396 |
| C | -8.033966393   | -6.3544080319 | -1.7560527729 |
| C | -9.4865514948  | -3.3355815204 | -1.490677766  |
| O | -4.8137990479  | -3.2877008435 | -3.5812341153 |
| O | -7.4185367001  | -7.6062793214 | -1.5388686826 |
| N | -9.4584705175  | -3.2636680087 | -0.0357874051 |
| O | -7.9888975202  | -1.5431680376 | 0.1588233616  |
| C | -8.7429941492  | -2.3640325511 | 0.6766551365  |
| C | -8.9158835697  | -2.418935568  | 2.1777536957  |
| H | -7.4879796506  | -4.166207115  | -5.2770613398 |
| H | -8.3734750676  | -2.0568468553 | -4.6856959357 |
| H | -8.3231941901  | -1.2286107865 | -2.5152497076 |
| H | -7.3759747306  | -3.6739515216 | -1.3550959775 |
| H | -7.6973611428  | -6.275914308  | -3.8491698632 |
| H | -5.3667768836  | -6.3037801981 | -3.1555842808 |
| H | -5.6308012385  | -5.0365891881 | -1.9697475877 |
| H | -5.2920216522  | -4.6887098505 | -4.9139071787 |
| H | -5.5982085476  | -1.7867295623 | -4.5327087395 |
| H | -6.5906902375  | -1.4841581473 | -1.1747987338 |
| H | -9.1248991613  | -6.4573223161 | -1.8659543322 |
| H | -7.846051415   | -5.7769716668 | -0.8462246551 |
| H | -10.0625151968 | -2.4941683764 | -1.8955977616 |
| H | -10.0261027184 | -4.246568391  | -1.7528628353 |
| H | -5.1853381953  | -2.8287106287 | -2.798214592  |
| H | -7.6050198181  | -8.161470015  | -2.3067245718 |
| H | -10.0797873253 | -3.8732468579 | 0.4702516991  |
| H | -7.934246757   | -2.5499125338 | 2.6384342645  |
| H | -9.3076621494  | -1.4573231684 | 2.5181661195  |
| H | -9.5799478229  | -3.2149705801 | 2.5223004289  |

calc\_2c conf\_45

|   |               |               |               |
|---|---------------|---------------|---------------|
| C | -7.1931761584 | -2.2269001034 | -3.7556701947 |
| C | -7.1679707944 | -2.3582491583 | -2.2111812899 |
| C | -7.7306803164 | -3.7673233643 | -1.9288030746 |
| N | -7.9952667976 | -4.3856124918 | -3.2428884876 |
| C | -7.2054041369 | -3.6724720865 | -4.2505222303 |
| C | -7.6059194046 | -5.7868862944 | -3.4476198788 |
| C | -6.0867614973 | -5.7592896782 | -3.6849481797 |
| C | -5.8322369558 | -4.4079341964 | -4.3590426016 |
| O | -6.0989610767 | -1.46053802   | -4.2309914694 |
| O | -5.861950482  | -2.1540915079 | -1.7129635441 |
| C | -8.0823731789 | -6.8065979602 | -2.4220672038 |
| C | -9.0305839435 | -3.711110212  | -1.1169342448 |
| O | -4.7685677245 | -3.7396622297 | -3.6866245086 |
| O | -7.4226581314 | -6.7619741093 | -1.1698986785 |
| N | -8.8611178253 | -3.1304918733 | 0.1955020366  |
| O | -9.8772099656 | -1.1637372866 | -0.3085370093 |
| C | -9.2798905953 | -1.8652369731 | 0.4929272216  |
| C | -8.9391412849 | -1.3809425682 | 1.885260701   |
| H | -7.7108705962 | -3.7580443449 | -5.2201893116 |

|   |               |               |               |
|---|---------------|---------------|---------------|
| H | -8.1279195023 | -1.7452554459 | -4.0626932035 |
| H | -7.7811449338 | -1.5834476837 | -1.7480850929 |
| H | -6.9663152774 | -4.3127708485 | -1.3562380466 |
| H | -8.0962731693 | -6.0847564479 | -4.3869004408 |
| H | -5.7373479287 | -6.6075447094 | -4.2789715427 |
| H | -5.5561565493 | -5.7830289352 | -2.7284333844 |
| H | -5.5569500733 | -4.5259564179 | -5.4140931579 |
| H | -5.7039385063 | -1.0824493656 | -3.4232088071 |
| H | -5.3061873056 | -2.8544285838 | -2.1168206907 |
| H | -7.8785014001 | -7.8007115194 | -2.8317567515 |
| H | -9.1707752154 | -6.7239158126 | -2.304861898  |
| H | -9.7589991179 | -3.092703461  | -1.644217429  |
| H | -9.4731045806 | -4.7116253685 | -1.0262527569 |
| H | -4.7444842081 | -2.8599228423 | -4.1065842612 |
| H | -7.9030694828 | -6.1502695842 | -0.602295916  |
| H | -8.2872071438 | -3.6106245973 | 0.8704861491  |
| H | -9.8132011712 | -0.8788983554 | 2.3030240855  |
| H | -8.6216004323 | -2.1768021414 | 2.5636684052  |
| H | -8.1370831362 | -0.6407934215 | 1.8144266875  |

calc\_2c conf\_46

|   |                |               |               |
|---|----------------|---------------|---------------|
| C | -7.3818274985  | -2.3993469581 | -4.1475722005 |
| C | -8.008644803   | -2.2392941148 | -2.7282103    |
| C | -7.8901860901  | -3.6190477458 | -2.058401928  |
| N | -7.8688735329  | -4.5412094248 | -3.2153101175 |
| C | -7.0138625527  | -3.8845707232 | -4.2236810626 |
| C | -7.2109738062  | -5.8570693293 | -3.0747955384 |
| C | -5.6942384059  | -5.6134285696 | -3.1461890147 |
| C | -5.5458226836  | -4.2696834433 | -3.8750551106 |
| O | -6.2888824416  | -1.5190779208 | -4.3223037712 |
| O | -7.3656513079  | -1.1886664125 | -2.043732473  |
| C | -7.6874866931  | -6.6718520648 | -1.8940659724 |
| C | -9.0917113979  | -3.8969292233 | -1.1457163627 |
| O | -4.9235878419  | -3.3693192532 | -2.9863046403 |
| O | -9.0815062204  | -6.9028187211 | -1.947189691  |
| N | -9.4391306303  | -2.811520206  | -0.2339143789 |
| O | -7.3569262727  | -2.2744526516 | 0.4914486597  |
| C | -8.5791418331  | -2.1484787228 | 0.5700193306  |
| C | -9.2008860107  | -1.1916992793 | 1.5610383562  |
| H | -7.2508413632  | -4.3109542938 | -5.2061745218 |
| H | -8.1347757047  | -2.1697605993 | -4.9092710214 |
| H | -9.0692761577  | -1.978734371  | -2.8318682704 |
| H | -6.9590761039  | -3.6514957976 | -1.4821589646 |
| H | -7.5111767626  | -6.409524808  | -3.9768873567 |
| H | -5.1811883152  | -6.4340583382 | -3.6535864722 |
| H | -5.2499466726  | -5.5034905404 | -2.1523360921 |
| H | -4.9565619721  | -4.3653985565 | -4.7982261509 |
| H | -6.3594078378  | -0.9179564954 | -3.5503288245 |
| H | -7.0241980501  | -1.5329413757 | -1.1947126511 |
| H | -7.4058125393  | -6.1743309142 | -0.9532806583 |
| H | -7.1836473826  | -7.6443132128 | -1.9020935008 |
| H | -9.962451129   | -4.0432565333 | -1.7918889784 |
| H | -8.9507499753  | -4.8183550252 | -0.5750822155 |
| H | -5.0107150636  | -2.503291322  | -3.4235545198 |
| H | -9.4442613105  | -6.2174580695 | -2.5253618883 |
| H | -10.4226658465 | -2.6710338655 | -0.0684632649 |
| H | -8.8045910788  | -1.4167333392 | 2.5534301705  |
| H | -8.8870868809  | -0.175966589  | 1.307477344   |

H -10.2922298312 -1.227481189 1.5943040525

calc\_2c conf\_47

C -7.3778266214 -2.315082544 -4.3241512547  
C -6.8526490612 -1.8033148251 -2.967686116  
C -7.4747382781 -2.7780064849 -1.9529317081  
N -7.9037822746 -3.9736671457 -2.7150229008  
C -7.4935680933 -3.8328011537 -4.1192709486  
C -7.4263887382 -5.3073651758 -2.3238918251  
C -6.0642009797 -5.4734705966 -3.0108670671  
C -6.1990865417 -4.6919862724 -4.3175455922  
O -6.5411136377 -1.9230702925 -5.399474154  
O -5.4462729121 -1.7259424971 -2.9733691375  
C -7.4084417461 -5.6188515942 -0.8313866033  
C -8.6874717662 -2.108088749 -1.2895942336  
O -5.0105773613 -3.9377373982 -4.5181691894  
O -7.0798020751 -6.9752013293 -0.6092065962  
N -9.5096801193 -3.0205002778 -0.5417539021  
O -9.2249175097 -2.0095329152 1.4713174333  
C -9.7218351363 -2.8992212863 0.7995748159  
C -10.6153894036 -3.9582083675 1.4106532573  
H -8.2724421865 -4.2516382786 -4.7674073705  
H -8.3840295996 -1.916954372 -4.4993152116  
H -7.1890737327 -0.7801847896 -2.7742720161  
H -6.7304386564 -3.0164826246 -1.1862867615  
H -8.1230949038 -6.0291895406 -2.7727869233  
H -5.7834003474 -6.5174425051 -3.1692825848  
H -5.2756853668 -4.9956018306 -2.4146931837  
H -6.3377221497 -5.3631264488 -5.1736868019  
H -5.8720395063 -1.3453339907 -4.9900304046  
H -5.0959207418 -2.587006028 -3.2906768525  
H -8.400530861 -5.4722966208 -0.4017556471  
H -6.7196647859 -4.9527467856 -0.2938237774  
H -8.3605222758 -1.3333784911 -0.5925241781  
H -9.2961755156 -1.6299953394 -2.0693595587  
H -5.2197099099 -3.3339059467 -5.2544573771  
H -6.1367698973 -7.0834118111 -0.7819882874  
H -9.9377999812 -3.7726589981 -1.0575580568  
H -10.0255137789 -4.5563233818 2.110227491  
H -11.3989345441 -3.4628171593 1.9877173786  
H -11.0777890037 -4.625456152 0.6787358457

calc\_2c conf\_48

C -7.3863935362 -2.1642257645 -3.870037857  
C -6.7210684161 -2.0132187761 -2.4748371724  
C -6.8792720566 -3.3968078563 -1.7922026812  
N -7.7335021338 -4.1762060717 -2.7178172224  
C -7.4527901584 -3.6799500044 -4.0656915878  
C -7.5176027897 -5.6260823492 -2.8380281043  
C -6.3200780194 -5.7962303862 -3.8065244055  
C -6.2090577574 -4.4514082037 -4.5579675276  
O -6.7364294323 -1.4438156269 -4.8714741302  
O -5.3764556866 -1.6071324911 -2.5952116369  
C -7.3823027928 -6.374334919 -1.5228847338  
C -7.4903602382 -3.3099727648 -0.3904003271  
O -5.0127683055 -3.7544713782 -4.1992875062  
O -8.5579601415 -6.3658043181 -0.7527823231

|   |                |               |               |
|---|----------------|---------------|---------------|
| N | -8.9218763945  | -3.1372104189 | -0.4957255081 |
| O | -9.1537215686  | -2.1676663312 | 1.5359080087  |
| C | -9.6518305247  | -2.5277351439 | 0.4826212226  |
| C | -11.1243072286 | -2.3479691798 | 0.1792652549  |
| H | -8.2784733918  | -3.9638753931 | -4.7293621894 |
| H | -8.422869749   | -1.811272003  | -3.8027136451 |
| H | -7.2108833691  | -1.2273951264 | -1.895965734  |
| H | -5.8714589348  | -3.8241242113 | -1.6921180116 |
| H | -8.4183368524  | -6.0172651664 | -3.3277468565 |
| H | -6.4719864048  | -6.6442218601 | -4.47968731   |
| H | -5.3893306129  | -5.9767245277 | -3.2563590754 |
| H | -6.2320366448  | -4.5683052776 | -5.6461824517 |
| H | -5.8920399625  | -1.1691222518 | -4.4730913693 |
| H | -4.9177025708  | -2.3523786549 | -3.027754341  |
| H | -6.5149873566  | -5.9940633725 | -0.9592017112 |
| H | -7.1741753852  | -7.4251896268 | -1.7453787764 |
| H | -7.2534602777  | -4.2024872335 | 0.2015649213  |
| H | -7.062081335   | -2.463601763  | 0.1543861545  |
| H | -4.2583171304  | -4.2703255111 | -4.5091784808 |
| H | -8.8125503785  | -5.4456755839 | -0.5901267223 |
| H | -9.3159416969  | -3.3441036105 | -1.4054163302 |
| H | -11.7055944875 | -2.9252786099 | 0.9026861679  |
| H | -11.3849998646 | -1.2965633791 | 0.31898105    |
| H | -11.4089964136 | -2.6577848536 | -0.8292570516 |

calc\_2c conf\_49

|   |               |               |               |
|---|---------------|---------------|---------------|
| C | -7.3673156967 | -2.6343971485 | -4.6602840259 |
| C | -7.4616292636 | -1.9287336433 | -3.2857366002 |
| C | -7.6978520316 | -3.0657257954 | -2.2522778574 |
| N | -7.7884382189 | -4.3127620054 | -3.0691177145 |
| C | -7.00409359   | -4.07091609   | -4.2882280195 |
| C | -7.1775293886 | -5.557141235  | -2.5753571226 |
| C | -5.6592691804 | -5.400251924  | -2.7580142666 |
| C | -5.5293709644 | -4.4315238365 | -3.9547291204 |
| O | -6.5174285436 | -1.9894742573 | -5.5574649061 |
| O | -6.3170297006 | -1.1507457561 | -3.0265120104 |
| C | -7.6718078504 | -5.9877203969 | -1.2160953009 |
| C | -8.9568237108 | -2.7382077505 | -1.4359442343 |
| O | -4.7755030083 | -3.2704292179 | -3.6034716558 |
| O | -9.0880050122 | -6.1239306753 | -1.2317473418 |
| N | -9.1595031666 | -3.4745067377 | -0.2134873228 |
| O | -8.8416432937 | -1.6851228782 | 1.1571969646  |
| C | -9.1055209359 | -2.868085948  | 1.0059961305  |
| C | -9.4081422834 | -3.7739773635 | 2.1821936543  |
| H | -7.328693903  | -4.7757497008 | -5.0625872377 |
| H | -8.3699369686 | -2.6737472353 | -5.1019510946 |
| H | -8.2918156761 | -1.2185548766 | -3.2805001641 |
| H | -6.8389434295 | -3.0801251609 | -1.5657033013 |
| H | -7.5132837062 | -6.3300464343 | -3.282995234  |
| H | -5.1636909717 | -6.3608364344 | -2.922759813  |
| H | -5.2053054653 | -4.9350822887 | -1.875912592  |
| H | -5.0549383107 | -4.9013008808 | -4.8226402562 |
| H | -5.9774902664 | -1.3961455716 | -5.0073348764 |
| H | -5.5749691128 | -1.7807985152 | -2.9567159744 |
| H | -7.3753490851 | -5.2609513382 | -0.4488669455 |
| H | -7.2379927447 | -6.9567947932 | -0.9493505927 |
| H | -8.8882608768 | -1.6910354033 | -1.1299685111 |
| H | -9.8295265233 | -2.8469188984 | -2.0936883725 |

|   |                |               |               |
|---|----------------|---------------|---------------|
| H | -3.8786120782  | -3.5492117869 | -3.3807193079 |
| H | -9.38713802    | -5.6866744186 | -2.0450970033 |
| H | -9.4154740577  | -4.4537694831 | -0.2773287232 |
| H | -8.6013071943  | -3.681847204  | 2.9125543311  |
| H | -10.3241347899 | -3.4257431498 | 2.6668076113  |
| H | -9.5302309803  | -4.8250137664 | 1.9088388073  |

calc\_2c conf\_50

|   |                |               |               |
|---|----------------|---------------|---------------|
| C | -7.1716362517  | -2.4555349858 | -4.4168736742 |
| C | -8.1137412384  | -2.1566649323 | -3.2144089853 |
| C | -7.9842425955  | -3.3736560458 | -2.2800327166 |
| N | -7.8273955505  | -4.4550830553 | -3.269985115  |
| C | -6.8366336804  | -3.9486955369 | -4.2311142467 |
| C | -7.2594091892  | -5.7547956228 | -2.8781116404 |
| C | -5.73442808    | -5.5539797695 | -2.7744949034 |
| C | -5.4400140886  | -4.3315496369 | -3.6600067778 |
| O | -6.0843815052  | -1.5583941437 | -4.4610242443 |
| O | -7.8242413138  | -0.9281608052 | -2.6089868148 |
| C | -7.9050056863  | -6.3973844935 | -1.6677430368 |
| C | -9.2149447586  | -3.4823232431 | -1.3757646242 |
| O | -4.9091652339  | -3.2514304286 | -2.8807930751 |
| O | -9.2719818708  | -6.6697426131 | -1.8911678481 |
| N | -9.2099449016  | -2.4241561153 | -0.3895652542 |
| O | -8.2877625796  | -3.7426333809 | 1.2176336851  |
| C | -8.6423134715  | -2.6374202194 | 0.8334994148  |
| C | -8.4896259664  | -1.4036167272 | 1.6968569675  |
| H | -6.9422629773  | -4.5019169837 | -5.1716851617 |
| H | -7.7091828428  | -2.3080543764 | -5.3554760636 |
| H | -9.1487800535  | -2.136818741  | -3.5830634568 |
| H | -7.0976131765  | -3.2409958839 | -1.6422867113 |
| H | -7.4587244382  | -6.4197053561 | -3.7300215948 |
| H | -5.1870504876  | -6.4476413576 | -3.085587917  |
| H | -5.4419673154  | -5.3216287719 | -1.7447824029 |
| H | -4.7434765529  | -4.5565911247 | -4.4758894291 |
| H | -5.4035510552  | -1.9150380662 | -3.8572254514 |
| H | -7.0326179541  | -0.6045398339 | -3.0801818445 |
| H | -7.7534967882  | -5.7753357821 | -0.7734235449 |
| H | -7.4191488113  | -7.3595269932 | -1.4767797012 |
| H | -10.1243944214 | -3.4090022909 | -1.9844538258 |
| H | -9.2553797841  | -4.4169354    | -0.819130664  |
| H | -4.0283597353  | -3.5001050303 | -2.5729011855 |
| H | -9.6200904884  | -5.9348420382 | -2.4140624373 |
| H | -9.2165125737  | -1.4762089353 | -0.7399987303 |
| H | -9.0739208526  | -0.5511278627 | 1.3429121359  |
| H | -8.7905360483  | -1.6510906194 | 2.7161436272  |
| H | -7.434065681   | -1.117672797  | 1.7249772484  |

calc\_2c conf\_51

|   |                |               |               |
|---|----------------|---------------|---------------|
| C | -7.2593902024  | -2.3107148429 | -4.3637692889 |
| C | -7.5595736886  | -1.920136164  | -2.8922302695 |
| C | -8.01634446495 | -3.2367495931 | -2.221470911  |
| N | -8.0269875913  | -4.2489582045 | -3.2959075938 |
| C | -7.0372828103  | -3.8251399341 | -4.285368844  |
| C | -7.6083650773  | -5.6120038274 | -2.9568598496 |
| C | -6.0611940472  | -5.5820535876 | -2.9268026897 |
| C | -5.6686337972  | -4.3858416717 | -3.819298838  |
| O | -6.2399385395  | -1.5524673306 | -4.9388690847 |

|   |                |               |               |
|---|----------------|---------------|---------------|
| O | -6.4364795537  | -1.3258441841 | -2.2794463967 |
| C | -8.252865175   | -6.2217166344 | -1.7181964555 |
| C | -9.396345192   | -3.1192039818 | -1.5701070708 |
| O | -4.9345381622  | -3.4016543154 | -3.0820822685 |
| O | -7.8098737518  | -7.5558938871 | -1.5383540586 |
| N | -9.3897556215  | -2.2341713338 | -0.4235642164 |
| O | -8.4130382462  | -3.7556359664 | 0.9396801414  |
| C | -8.8312743579  | -2.620204031  | 0.7552006554  |
| C | -8.748119444   | -1.5493308711 | 1.8208224995  |
| H | -7.2616543496  | -4.3072522448 | -5.2443640089 |
| H | -8.1686259578  | -2.1639579665 | -4.9576123862 |
| H | -8.3398438683  | -1.1545299195 | -2.8530773911 |
| H | -7.2958585145  | -3.4728585149 | -1.4250023175 |
| H | -7.9097172088  | -6.2418228138 | -3.8039427108 |
| H | -5.6290040147  | -6.5278659549 | -3.2625047676 |
| H | -5.6976829657  | -5.3893790863 | -1.9090790847 |
| H | -5.0657351423  | -4.6841269495 | -4.6834775966 |
| H | -5.7505163654  | -1.1800138436 | -4.1859204124 |
| H | -5.7574518334  | -2.0272826988 | -2.2443401936 |
| H | -9.3355572161  | -6.2760920204 | -1.8626347842 |
| H | -8.0672320556  | -5.6140570789 | -0.8229598325 |
| H | -10.1207020091 | -2.7483297414 | -2.3005913071 |
| H | -9.7412226465  | -4.0978707094 | -1.2336206563 |
| H | -4.1312320741  | -3.8190386954 | -2.7471297019 |
| H | -6.9693832392  | -7.522491558  | -1.0673872657 |
| H | -9.5949418348  | -1.2579808933 | -0.5623640267 |
| H | -9.4690987176  | -0.7403023552 | 1.6783659451  |
| H | -8.9100909713  | -2.0118833512 | 2.7950004038  |
| H | -7.7414491073  | -1.1201432432 | 1.8172666342  |

calc\_2c conf\_52

|   |                |               |               |
|---|----------------|---------------|---------------|
| C | -7.3218466809  | -2.2075823081 | -4.027475607  |
| C | -6.9735601141  | -1.9018473738 | -2.5352375939 |
| C | -6.9741003014  | -3.2591042029 | -1.8116866082 |
| N | -7.8266696508  | -4.1035528994 | -2.6768233147 |
| C | -7.5305297217  | -3.7301145285 | -4.0597906665 |
| C | -7.660101483   | -5.5602329688 | -2.670457942  |
| C | -6.4717974115  | -5.8650591761 | -3.6187825219 |
| C | -6.3430037401  | -4.6180188421 | -4.5116137705 |
| O | -6.3603387851  | -1.6992566325 | -4.9207323801 |
| O | -5.7303171233  | -1.2684286672 | -2.4089057132 |
| C | -7.5455054892  | -6.2251081319 | -1.3055521707 |
| C | -7.5188285554  | -3.1437597146 | -0.3877104129 |
| O | -5.1147407233  | -3.9267523356 | -4.2672094026 |
| O | -7.5954033571  | -7.632118163  | -1.4300978528 |
| N | -8.9451139437  | -2.9334825592 | -0.4208659209 |
| O | -9.0636298166  | -1.9649517318 | 1.6211571003  |
| C | -9.6198399522  | -2.3563218904 | 0.6065023512  |
| C | -11.1165075565 | -2.2215509195 | 0.4088327932  |
| H | -8.3825072172  | -4.0070196583 | -4.6928037991 |
| H | -8.2587269657  | -1.7121986398 | -4.2899453161 |
| H | -7.7638359064  | -1.2703882819 | -2.1052279091 |
| H | -5.9305211248  | -3.6010116795 | -1.7705656582 |
| H | -8.567116907   | -5.9735272516 | -3.1306962059 |
| H | -6.6356270712  | -6.7806478943 | -4.1930123647 |
| H | -5.5388018527  | -5.98113041   | -3.0537401254 |
| H | -6.4198171481  | -4.8530924801 | -5.5794327294 |
| H | -5.6031109671  | -2.3132894745 | -4.864747976  |

|   |                |               |               |
|---|----------------|---------------|---------------|
| H | -5.5652063342  | -0.8671359216 | -3.2794160098 |
| H | -8.3951582072  | -5.943962675  | -0.6788623531 |
| H | -6.62785059    | -5.905828204  | -0.7917182951 |
| H | -7.2698501557  | -4.0262328399 | 0.2130942679  |
| H | -7.0471531485  | -2.2908070528 | 0.10835275    |
| H | -4.3863362045  | -4.470449761  | -4.5932645486 |
| H | -6.7486998612  | -7.9287310302 | -1.7848712743 |
| H | -9.4224683131  | -3.2931149365 | -1.235319571  |
| H | -11.4746638326 | -2.6142190663 | -0.5462473897 |
| H | -11.6272550484 | -2.7429217679 | 1.2219154514  |
| H | -11.3854587388 | -1.1650479296 | 0.4819586898  |

**Table S40.** Sampled and DFT geometry optimized conformers related to calc\_2d, with energy values (Hartree) and related % contribution on the final Boltzmann distribution for the three employed functional/basis set combinations.

| Conformer       | MPW1PW91/6-31g(d,p) |                                              | MPW1PW91/6-311+g(d,p) |                                              | B97-2/cc-pVTZ    |                                              |
|-----------------|---------------------|----------------------------------------------|-----------------------|----------------------------------------------|------------------|----------------------------------------------|
|                 | Energy (Hartree)    | % contribution on the Boltzmann distribution | Energy (Hartree)      | % contribution on the Boltzmann distribution | Energy (Hartree) | % contribution on the Boltzmann distribution |
| calc_2d conf_1  | -916.6602254        | 86.03%                                       | -916.8959853          | 48.60%                                       | -916.8428697     | 23.79%                                       |
| calc_2d conf_2  | -916.6579264        | 7.54%                                        | -916.8953805          | 25.61%                                       | -916.8432410     | 35.25%                                       |
| calc_2d conf_3  | -916.6567706        | 2.22%                                        | -916.8949115          | 15.58%                                       | -916.8424834     | 15.80%                                       |
| calc_2d conf_4  | -916.6567506        | 2.17%                                        | -916.8935842          | 3.82%                                        | -916.8421527     | 11.13%                                       |
| calc_2d conf_5  | -916.6563070        | 1.36%                                        | -916.8938544          | 5.09%                                        | -916.8420066     | 9.54%                                        |
| calc_2d conf_6  | -916.6551986        | 0.42%                                        | -916.8892291          | 0.04%                                        | -916.8386682     | 0.28%                                        |
| calc_2d conf_7  | -916.6539039        | 0.11%                                        | -916.8919865          | 0.70%                                        | -916.8405758     | 2.10%                                        |
| calc_2d conf_8  | -916.6529672        | 0.04%                                        | -916.8897929          | 0.07%                                        | -916.8385423     | 0.24%                                        |
| calc_2d conf_9  | -916.6528236        | 0.03%                                        | -916.8896250          | 0.06%                                        | -916.8385582     | 0.25%                                        |
| calc_2d conf_10 | -916.6522584        | 0.02%                                        | -916.8861748          | 0.00%                                        | -916.8354509     | 0.01%                                        |
| calc_2d conf_11 | -916.6522133        | 0.02%                                        | -916.8876632          | 0.01%                                        | -916.8369902     | 0.05%                                        |
| calc_2d conf_12 | -916.6521418        | 0.02%                                        | -916.8896318          | 0.06%                                        | -916.8385297     | 0.24%                                        |
| calc_2d conf_13 | -916.6520655        | 0.02%                                        | -916.8860581          | 0.00%                                        | -916.8354306     | 0.01%                                        |
| calc_2d conf_14 | -916.6514534        | 0.01%                                        | -916.8909015          | 0.22%                                        | -916.8396257     | 0.77%                                        |
| calc_2d conf_15 | -916.6510172        | 0.01%                                        | -916.8873766          | 0.01%                                        | -916.8361109     | 0.02%                                        |
| calc_2d conf_16 | -916.6509492        | 0.00%                                        | -916.8897769          | 0.07%                                        | -916.8384907     | 0.23%                                        |
| calc_2d conf_17 | -916.6505226        | 0.00%                                        | -916.8869896          | 0.00%                                        | -916.8357173     | 0.01%                                        |
| calc_2d conf_18 | -916.6504742        | 0.00%                                        | -916.8892337          | 0.04%                                        | -916.8381284     | 0.16%                                        |
| calc_2d conf_19 | -916.6494853        | 0.00%                                        | -916.8866687          | 0.00%                                        | -916.8355612     | 0.01%                                        |
| calc_2d conf_20 | -916.6492676        | 0.00%                                        | -916.8875793          | 0.01%                                        | -916.8364101     | 0.03%                                        |
| calc_2d conf_21 | -916.6491423        | 0.00%                                        | -916.8830372          | 0.00%                                        | -916.8330498     | 0.00%                                        |
| calc_2d conf_22 | -916.6488090        | 0.00%                                        | -916.8882200          | 0.01%                                        | -916.8370444     | 0.05%                                        |
| calc_2d conf_23 | -916.6486700        | 0.00%                                        | -916.8842583          | 0.00%                                        | -916.8340766     | 0.00%                                        |
| calc_2d conf_24 | -916.6482572        | 0.00%                                        | -916.8852167          | 0.00%                                        | -916.8344317     | 0.00%                                        |
| calc_2d conf_25 | -916.6480039        | 0.00%                                        | -916.8832578          | 0.00%                                        | -916.8323040     | 0.00%                                        |
| calc_2d conf_26 | -916.6474383        | 0.00%                                        | -916.8837327          | 0.00%                                        | -916.8334163     | 0.00%                                        |
| calc_2d conf_27 | -916.6473577        | 0.00%                                        | -916.8855042          | 0.00%                                        | -916.8348847     | 0.01%                                        |
| calc_2d conf_28 | -916.6468530        | 0.00%                                        | -916.8860622          | 0.00%                                        | -916.8350201     | 0.01%                                        |



|                 |              |       |              |       |              |       |
|-----------------|--------------|-------|--------------|-------|--------------|-------|
| calc_2d conf_29 | -916.6468474 | 0.00% | -916.8846051 | 0.00% | -916.8337990 | 0.00% |
| calc_2d conf_30 | -916.6465621 | 0.00% | -916.8853328 | 0.00% | -916.8343019 | 0.00% |
| calc_2d conf_31 | -916.6464920 | 0.00% | -916.8859177 | 0.00% | -916.8352544 | 0.01% |
| calc_2d conf_32 | -916.6461138 | 0.00% | -916.8845756 | 0.00% | -916.8332151 | 0.00% |
| calc_2d conf_33 | -916.6458219 | 0.00% | -916.8842265 | 0.00% | -916.8334170 | 0.00% |
| calc_2d conf_34 | -916.6457829 | 0.00% | -916.8852733 | 0.00% | -916.8346174 | 0.00% |
| calc_2d conf_35 | -916.6454169 | 0.00% | -916.8854930 | 0.00% | -916.8350438 | 0.01% |
| calc_2d conf_36 | -916.6444355 | 0.00% | -916.8845010 | 0.00% | -916.8338331 | 0.00% |
| calc_2d conf_37 | -916.6438194 | 0.00% | -916.8820646 | 0.00% | -916.8314767 | 0.00% |
| calc_2d conf_38 | -916.6437971 | 0.00% | -916.8827304 | 0.00% | -916.8319925 | 0.00% |
| calc_2d conf_39 | -916.6435138 | 0.00% | -916.8823569 | 0.00% | -916.8321443 | 0.00% |
| calc_2d conf_40 | -916.6433259 | 0.00% | -916.8847580 | 0.00% | -916.8338578 | 0.00% |
| calc_2d conf_41 | -916.6428984 | 0.00% | -916.8838123 | 0.00% | -916.8334919 | 0.00% |
| calc_2d conf_42 | -916.6426125 | 0.00% | -916.8795741 | 0.00% | -916.8299328 | 0.00% |
| calc_2d conf_43 | -916.6425132 | 0.00% | -916.8798507 | 0.00% | -916.8302082 | 0.00% |
| calc_2d conf_44 | -916.6420538 | 0.00% | -916.8792092 | 0.00% | -916.8282448 | 0.00% |
| calc_2d conf_45 | -916.6412700 | 0.00% | -916.8800598 | 0.00% | -916.8291861 | 0.00% |
| calc_2d conf_46 | -916.6390525 | 0.00% | -916.8774673 | 0.00% | -916.8267158 | 0.00% |
| calc_2d conf_47 | -916.6385838 | 0.00% | -916.8775320 | 0.00% | -916.8267990 | 0.00% |

**Table S41.** Cartesian coordinates of the optimized geometries for the conformers related to calc\_2d. The related energies and % contribution on the final Boltzmann distribution for the three employed functional/basis set combinations are reported in Table S40.

calc\_2d conf\_1

|   |               |               |               |
|---|---------------|---------------|---------------|
| C | -5.6312983065 | -2.1941409735 | 0.1640601368  |
| C | -6.7619517758 | -1.2695529933 | 0.6331875336  |
| C | -6.7760044328 | -0.195787355  | -0.4528002485 |
| N | -5.3454024628 | 0.0985583804  | -0.5334142966 |
| C | -4.6629229912 | -1.2199128964 | -0.5403515664 |
| C | -4.8799650274 | 0.8759594357  | -1.6965388589 |
| C | -3.8728947539 | -0.0350052024 | -2.4237719253 |
| C | -4.29013101   | -1.4449412867 | -2.0188500836 |
| O | -6.1547831214 | -3.1819336565 | -0.7134138549 |
| O | -7.9519729961 | -1.9895392527 | 0.773415285   |
| C | -4.2832407027 | 2.2045869871  | -1.1831078884 |
| C | -7.6861661745 | 0.9942648803  | -0.1805694176 |
| O | -5.3908448933 | -1.7912071424 | -2.8245735802 |
| O | -4.955161443  | 2.619032791   | -0.0131301111 |
| N | -7.5240966963 | 1.6370901066  | 1.1068271191  |
| O | -8.8939029621 | 0.2069680879  | 2.2102375532  |
| C | -8.190740216  | 1.2195294111  | 2.2044293299  |
| C | -8.0411809477 | 2.0704028772  | 3.4426239248  |
| H | -3.7308048229 | -1.1500002323 | 0.0337275355  |
| H | -5.1442002775 | -2.7014070907 | 1.0044304951  |
| H | -6.4600154738 | -0.8019827845 | 1.5789977793  |
| H | -7.1357574753 | -0.6535185021 | -1.3883333994 |
| H | -5.7343477445 | 1.0860363779  | -2.3498098631 |
| H | -3.90018945   | 0.079618323   | -3.5092325117 |
| H | -2.851788203  | 0.1707380345  | -2.0821326103 |
| H | -3.4700128008 | -2.1712206985 | -2.1223507035 |
| H | -7.0678032213 | -3.3315604375 | -0.4107199283 |
| H | -8.5525746299 | -1.4003633952 | 1.2735938175  |
| H | -4.3778623279 | 2.9961644534  | -1.9313344017 |
| H | -3.2098579581 | 2.0707084934  | -0.9751481673 |
| H | -8.7191061251 | 0.6414126229  | -0.2521689271 |
| H | -7.5421945437 | 1.7564544287  | -0.9498918133 |
| H | -5.8349448756 | -2.5226322154 | -2.356734282  |
| H | -5.0584939806 | 1.760983276   | 0.4512766685  |
| H | -6.9611983864 | 2.4743013929  | 1.1357126453  |
| H | -7.3397512842 | 2.8987089185  | 3.3219108945  |
| H | -9.0218978503 | 2.4710481318  | 3.7114877364  |
| H | -7.7125376555 | 1.4371387047  | 4.2694599846  |

calc\_2d conf\_2

|   |               |               |               |
|---|---------------|---------------|---------------|
| C | -5.7843527184 | -2.2654769481 | 0.1057620243  |
| C | -6.8974402203 | -1.3155122821 | 0.5507346533  |
| C | -6.8085482602 | -0.2092039355 | -0.5003130981 |
| N | -5.3771281828 | 0.0426019629  | -0.466902641  |
| C | -4.7218972104 | -1.2865695214 | -0.4339991491 |
| C | -4.775160546  | 0.8385726483  | -1.5380753308 |
| C | -3.6560802139 | -0.0482615362 | -2.1230930751 |
| C | -4.1503564509 | -1.4643104319 | -1.8519057904 |
| O | -6.2814971643 | -3.1499059043 | -0.8915462784 |
| O | -8.1269078608 | -1.9793223476 | 0.6184226862  |
| C | -4.2353921749 | 2.1578765027  | -0.9980342411 |

|   |               |               |               |
|---|---------------|---------------|---------------|
| C | -7.6880259844 | 0.996552408   | -0.2132776722 |
| O | -5.1361646242 | -1.7400608249 | -2.8177196944 |
| O | -5.2391103902 | 3.015385925   | -0.4682941058 |
| N | -7.4663139038 | 1.6092890787  | 1.0741031554  |
| O | -8.9431056952 | 0.2679178303  | 2.1525398795  |
| C | -8.1169351973 | 1.1848000744  | 2.1762999499  |
| C | -7.802180021  | 1.9140597959  | 3.4609143552  |
| H | -3.8741030412 | -1.2621972337 | 0.2644145734  |
| H | -5.394215529  | -2.8641790791 | 0.9366245624  |
| H | -6.6160323466 | -0.8883418874 | 1.5205387305  |
| H | -7.1365031107 | -0.6217510989 | -1.47086748   |
| H | -5.5209981118 | 1.0430499527  | -2.3210482385 |
| H | -3.4969569872 | 0.117933681   | -3.1904939918 |
| H | -2.7082504815 | 0.1302894685  | -1.6002819986 |
| H | -3.3382571352 | -2.2064256131 | -1.8770761793 |
| H | -7.220965098  | -3.2782747859 | -0.6752028609 |
| H | -8.7101627532 | -1.3838487526 | 1.1296560554  |
| H | -3.6581774219 | 2.6797008029  | -1.7753131901 |
| H | -3.5608784198 | 1.9454707202  | -0.1646252726 |
| H | -8.7328239923 | 0.6791643446  | -0.2611362364 |
| H | -7.5392381666 | 1.7598665902  | -0.9808440032 |
| H | -5.6892238796 | -2.445835825  | -2.4349550446 |
| H | -5.7135224167 | 3.4056893864  | -1.2127283929 |
| H | -6.6877080106 | 2.2515588518  | 1.1317746189  |
| H | -8.7191544491 | 2.3788281434  | 3.8318518925  |
| H | -7.0343186084 | 2.682415792   | 3.3484856642  |
| H | -7.4809132218 | 1.1884540481  | 4.2116111642  |

calc\_2d conf\_3

|   |               |               |               |
|---|---------------|---------------|---------------|
| C | -5.8290489521 | -2.0252499695 | -0.0559874865 |
| C | -6.93862182   | -1.1686749759 | 0.539005382   |
| C | -6.9391633649 | 0.0264634469  | -0.4174228463 |
| N | -5.5117545463 | 0.2946415651  | -0.6051303451 |
| C | -4.7661083903 | -0.9710309728 | -0.3638199159 |
| C | -5.1458189459 | 0.8152224415  | -1.9390926397 |
| C | -4.5686425412 | -0.3728050442 | -2.7033706703 |
| C | -3.8874619673 | -1.2188210159 | -1.617459235  |
| O | -6.3026382609 | -2.6297686009 | -1.2522665948 |
| O | -8.1465923119 | -1.8718940577 | 0.5821712422  |
| C | -4.1734050289 | 1.9851207661  | -1.736789128  |
| C | -7.7508409789 | 1.2360725822  | 0.0380530135  |
| O | -3.6861831058 | -2.5683801248 | -1.9354972334 |
| O | -4.6432176733 | 2.8043760478  | -0.693436262  |
| N | -7.5360626045 | 1.6515851273  | 1.4106060652  |
| O | -9.0273322436 | 0.1826278367  | 2.27585804    |
| C | -8.2458737536 | 1.1208267364  | 2.4327049379  |
| C | -8.0435094323 | 1.7512900494  | 3.7896492166  |
| H | -4.1340620733 | -0.8671537312 | 0.5255439975  |
| H | -5.465950695  | -2.7932822936 | 0.6367552854  |
| H | -6.6250735415 | -0.8389992219 | 1.5387216954  |
| H | -7.4003294287 | -0.3211263927 | -1.3558883747 |
| H | -6.049494003  | 1.2123628047  | -2.4143552297 |
| H | -5.3755412374 | -0.9620530434 | -3.1502304703 |
| H | -3.8765275811 | -0.0833556417 | -3.4998412244 |
| H | -2.8871281863 | -0.8195203842 | -1.4241991901 |
| H | -7.2019948101 | -2.9386474278 | -1.0564972491 |
| H | -8.7428428253 | -1.3261075832 | 1.1310939806  |
| H | -4.1058575281 | 2.5912461503  | -2.6448000459 |

|   |               |               |               |
|---|---------------|---------------|---------------|
| H | -3.1617557295 | 1.6046104152  | -1.5180393463 |
| H | -8.8132329297 | 0.9992351401  | -0.0703550344 |
| H | -7.5269918119 | 2.0894526454  | -0.6077363475 |
| H | -4.5706359147 | -2.9606689528 | -2.0244701209 |
| H | -4.9277641909 | 2.1334221764  | -0.0411580798 |
| H | -6.9256876116 | 2.43205762    | 1.5900133682  |
| H | -7.2564951119 | 2.5084607105  | 3.8097390428  |
| H | -8.9841331571 | 2.2102318955  | 4.1050984617  |
| H | -7.8072257115 | 0.9672332766  | 4.511829341   |

calc\_2d conf\_4

|   |                |               |               |
|---|----------------|---------------|---------------|
| C | -5.7682599365  | -2.1544457518 | -0.282312966  |
| C | -6.4344751139  | -1.3426213985 | 0.8247892922  |
| C | -6.4173892825  | 0.0768554711  | 0.2284464386  |
| N | -5.1120891606  | 0.1445337797  | -0.4387815684 |
| C | -4.6420756341  | -1.2317749734 | -0.733119338  |
| C | -5.0862506444  | 0.935834635   | -1.6862516822 |
| C | -5.0777852105  | -0.0855197957 | -2.8208550319 |
| C | -4.2898402654  | -1.2708342032 | -2.2435479799 |
| O | -6.7154659654  | -2.3400622227 | -1.3249539957 |
| O | -7.7042009883  | -1.8786464324 | 1.0612819683  |
| C | -3.8585397338  | 1.8521149889  | -1.6586674687 |
| C | -6.5627603555  | 1.2401754323  | 1.2233556789  |
| O | -4.5104106536  | -2.5066885939 | -2.8653688181 |
| O | -3.7666766312  | 2.5002863035  | -0.4133389106 |
| N | -7.9241346004  | 1.6942797281  | 1.4500318033  |
| O | -8.5345897841  | 0.0039340232  | 2.8232432697  |
| C | -8.79894792    | 1.0693358161  | 2.2631146785  |
| C | -10.1310041383 | 1.7489944716  | 2.4707679316  |
| H | -3.7555518274  | -1.4623222099 | -0.1307783582 |
| H | -5.3991781843  | -3.1247317733 | 0.0703799384  |
| H | -5.8074302116  | -1.3671757479 | 1.7288020711  |
| H | -7.2423994802  | 0.134007586   | -0.499093349  |
| H | -5.976366489   | 1.5745353332  | -1.709912082  |
| H | -6.0973715724  | -0.4182168761 | -3.0368842067 |
| H | -4.6370292657  | 0.2957370764  | -3.7469702757 |
| H | -3.2176836686  | -1.0827288444 | -2.3562595064 |
| H | -7.5620110118  | -2.4994563537 | -0.8729773521 |
| H | -8.1142814961  | -1.3408038806 | 1.7709436898  |
| H | -3.9410957494  | 2.6224427586  | -2.4309199296 |
| H | -2.9464083732  | 1.2707236917  | -1.8707034541 |
| H | -6.0073405628  | 2.0951053084  | 0.8306037912  |
| H | -6.1166990983  | 0.9700956923  | 2.1862519927  |
| H | -5.441942072   | -2.7290885309 | -2.7000723242 |
| H | -3.9048417402  | 1.7692880294  | 0.2164837675  |
| H | -8.2078495021  | 2.5585115898  | 1.0178779558  |
| H | -10.2480210788 | 2.6776354025  | 1.9076206559  |
| H | -10.9272371861 | 1.0563445121  | 2.1889018646  |
| H | -10.2493654116 | 1.9623459588  | 3.5358718097  |

calc\_2d conf\_5

|   |               |               |               |
|---|---------------|---------------|---------------|
| C | -5.577889399  | -2.2199369409 | -0.107679016  |
| C | -6.2537967973 | -1.2839267045 | 0.9052247635  |
| C | -6.3776544508 | 0.0385203183  | 0.131999337   |
| N | -5.0673746771 | 0.1084753613  | -0.5106180255 |
| C | -4.7257996643 | -1.2674809646 | -0.9603567721 |
| C | -4.9221348771 | 1.0230347913  | -1.6656433523 |

|   |                |               |               |
|---|----------------|---------------|---------------|
| C | -4.3545611823  | 0.1441640758  | -2.7918686409 |
| C | -4.920876169   | -1.232050305  | -2.4856193411 |
| O | -6.5704566654  | -2.8972624193 | -0.8649670024 |
| O | -7.449398305   | -1.8782959529 | 1.3186458037  |
| C | -3.9801868405  | 2.1702750568  | -1.287598067  |
| C | -6.6441351191  | 1.2738086445  | 1.0021858652  |
| O | -6.2768257481  | -1.2087755839 | -2.8665724379 |
| O | -2.8436497523  | 1.6699724129  | -0.6311580245 |
| N | -8.050209188   | 1.5577707044  | 1.2330696017  |
| O | -8.3325409232  | 0.0984030721  | 2.9388707309  |
| C | -8.7864577651  | 0.9754144531  | 2.2009962469  |
| C | -10.2081574249 | 1.4601585998  | 2.3495052502  |
| H | -3.6620450265  | -1.4530472905 | -0.7667783985 |
| H | -4.9562349568  | -2.9688765058 | 0.3960711622  |
| H | -5.5712006014  | -1.120251976  | 1.7515724522  |
| H | -7.1877590317  | -0.0595190131 | -0.6095579751 |
| H | -5.9035863592  | 1.4166141331  | -1.9612643363 |
| H | -4.6564633662  | 0.4907932185  | -3.7825813649 |
| H | -3.2612974429  | 0.1348047401  | -2.7339761746 |
| H | -4.3716431553  | -2.0441305587 | -2.9843411734 |
| H | -7.3375210041  | -2.9587069168 | -0.266808124  |
| H | -7.8305825847  | -1.3151051577 | 2.0251183785  |
| H | -4.5074478678  | 2.9080040557  | -0.6593327198 |
| H | -3.6417504875  | 2.6965030432  | -2.1859317316 |
| H | -6.2246955954  | 2.1571246524  | 0.5162576021  |
| H | -6.1488175411  | 1.1683809452  | 1.9718359807  |
| H | -6.6927031488  | -1.9422583838 | -2.3768031604 |
| H | -3.2193516067  | 1.0283039322  | -0.0014321517 |
| H | -8.4982376012  | 2.2321100681  | 0.6340510936  |
| H | -10.4805843452 | 2.2571992439  | 1.6540275791  |
| H | -10.8849587301 | 0.614374945   | 2.2069505087  |
| H | -10.3470145985 | 1.8174142056  | 3.3725056339  |

calc\_2d conf\_6

|   |               |               |               |
|---|---------------|---------------|---------------|
| C | -5.9770038731 | -2.5419160341 | -0.2758372687 |
| C | -7.305603866  | -1.7923890231 | -0.5061141412 |
| C | -7.024202007  | -0.3637777711 | -0.0577246032 |
| N | -5.5881808041 | -0.1506694469 | -0.3113670478 |
| C | -4.8962826892 | -1.4486368194 | -0.4748494044 |
| C | -5.2251781385 | 0.7619297016  | -1.4107431194 |
| C | -3.9532863126 | 0.1321437876  | -1.9795400911 |
| C | -4.2147750462 | -1.3666110688 | -1.8529428168 |
| O | -5.8448136676 | -3.6789761399 | -1.0912853738 |
| O | -7.6035839766 | -1.7746058088 | -1.8993796246 |
| C | -5.0472497835 | 2.1683938463  | -0.8267987821 |
| C | -7.3713468233 | -0.1148601158 | 1.4111327822  |
| O | -5.0316191765 | -1.8553945358 | -2.9102647974 |
| O | -4.3428129635 | 2.0949569033  | 0.3949795105  |
| N | -7.1177513122 | 1.2527634277  | 1.7903039615  |
| O | -9.2474539618 | 1.6804103264  | 2.4581676019  |
| C | -8.1022945782 | 2.0629835403  | 2.2750959071  |
| C | -7.6671636653 | 3.4784461382  | 2.589415632   |
| H | -4.1138402856 | -1.5595603069 | 0.2849483504  |
| H | -5.9484913029 | -2.894449476  | 0.7599532746  |
| H | -8.138019261  | -2.2519822135 | 0.0394732639  |
| H | -7.6105335981 | 0.3326620504  | -0.6662328167 |
| H | -6.0083158699 | 0.7924255302  | -2.1828822145 |
| H | -3.7583348499 | 0.4229034913  | -3.0137947678 |

|   |               |               |               |
|---|---------------|---------------|---------------|
| H | -3.0923631661 | 0.4202927334  | -1.3658763943 |
| H | -3.2996829452 | -1.9608239756 | -1.8921892904 |
| H | -5.4830900115 | -3.3608770832 | -1.9421415985 |
| H | -7.636758234  | -2.7098342045 | -2.1597479701 |
| H | -6.0356416761 | 2.6258659531  | -0.6732764545 |
| H | -4.4895008514 | 2.8075672221  | -1.5188792288 |
| H | -6.8017206136 | -0.8010719704 | 2.0526073392  |
| H | -8.434686101  | -0.2897206707 | 1.5916221661  |
| H | -5.9392443531 | -1.51275175   | -2.7763055283 |
| H | -4.4953600563 | 1.1681796506  | 0.673066004   |
| H | -6.2002335478 | 1.6420438511  | 1.6204585702  |
| H | -7.7496749162 | 3.6397958272  | 3.6675244509  |
| H | -6.6457715415 | 3.7054403045  | 2.2744079485  |
| H | -8.3581341734 | 4.1717041291  | 2.1050165714  |

calc\_2d conf\_7

|   |                |               |               |
|---|----------------|---------------|---------------|
| C | -5.9184358948  | -2.516593991  | -0.259362422  |
| C | -6.5093533434  | -1.70602221   | 0.9019404998  |
| C | -6.2814635091  | -0.2501921616 | 0.4776319795  |
| N | -4.9828100933  | -0.2844274928 | -0.1673603963 |
| C | -4.7205003474  | -1.6529397755 | -0.6789305964 |
| C | -4.6962891764  | 0.6796263511  | -1.2288987595 |
| C | -3.7071066138  | -0.0842437109 | -2.1124019189 |
| C | -4.3505567209  | -1.4687851397 | -2.1628273857 |
| O | -6.9099167284  | -2.6376479976 | -1.2624353766 |
| O | -7.8612278838  | -2.0418004801 | 1.0647355587  |
| C | -4.1785206577  | 2.0231580428  | -0.7359458979 |
| C | -6.3591313105  | 0.7217035209  | 1.6756309873  |
| O | -5.4452853267  | -1.3685409363 | -3.0397285445 |
| O | -5.2093950009  | 2.8817075856  | -0.2505847803 |
| N | -7.3487500331  | 1.7626557267  | 1.521725749   |
| O | -9.0852663737  | 0.3409131385  | 1.7950212405  |
| C | -8.6634915193  | 1.4786884923  | 1.5673050762  |
| C | -9.6158109552  | 2.6280605675  | 1.3453421587  |
| H | -3.832756306   | -2.0593351058 | -0.1725942537 |
| H | -5.5991287972  | -3.5183934102 | 0.0526471425  |
| H | -5.9340517055  | -1.9109120392 | 1.8177651784  |
| H | -7.0779287709  | 0.0187646245  | -0.2392882259 |
| H | -5.6010830527  | 0.8692525536  | -1.8366454168 |
| H | -3.6105593164  | 0.3464597188  | -3.1114864875 |
| H | -2.7173631874  | -0.1241783715 | -1.6416952781 |
| H | -3.6513764141  | -2.2500814542 | -2.4946876992 |
| H | -7.7537962218  | -2.5388496909 | -0.7778175763 |
| H | -8.3412168143  | -1.2466225728 | 1.3897303736  |
| H | -3.6314238407  | 2.5265163235  | -1.5458468538 |
| H | -3.4877632352  | 1.8726038411  | 0.0965791715  |
| H | -5.390579538   | 1.2000054292  | 1.8126118496  |
| H | -6.5946577849  | 0.1727920564  | 2.5931906503  |
| H | -6.171504637   | -1.8968219681 | -2.6620600367 |
| H | -5.7644840955  | 3.0943965112  | -1.0121475672 |
| H | -7.0180357368  | 2.6509176482  | 1.1767744968  |
| H | -9.1138949148  | 3.5863762329  | 1.1944657448  |
| H | -10.2432132206 | 2.4079696451  | 0.4781097747  |
| H | -10.2768709219 | 2.7058204988  | 2.2115378414  |

calc\_2d conf\_8

|   |               |               |               |
|---|---------------|---------------|---------------|
| C | -6.2945318769 | -2.4218033696 | -1.0605008557 |
|---|---------------|---------------|---------------|

|   |               |               |               |
|---|---------------|---------------|---------------|
| C | -6.9074687226 | -1.9226700604 | 0.2638478562  |
| C | -6.380447981  | -0.5018731704 | 0.3888591587  |
| N | -5.0044710193 | -0.5975239854 | -0.0742145291 |
| C | -4.9923846654 | -1.5988883229 | -1.1781995657 |
| C | -4.4096016683 | 0.6545456055  | -0.5812678236 |
| C | -3.7769884728 | 0.2698282019  | -1.9265758726 |
| C | -4.7429141036 | -0.7779038137 | -2.4570483553 |
| O | -7.2173667026 | -2.1853876372 | -2.1098302484 |
| O | -8.3147005386 | -1.9769457858 | 0.2114588441  |
| C | -3.3921747718 | 1.2799205742  | 0.3584355702  |
| C | -6.5666072614 | 0.0325668053  | 1.8156441515  |
| O | -5.8789406944 | -0.0781723674 | -2.9018789066 |
| O | -3.9496832773 | 1.7485031629  | 1.5821148922  |
| N | -7.0667513209 | 1.3864510536  | 1.8522090293  |
| O | -9.0991800623 | 0.6734758125  | 1.172456509   |
| C | -8.3413234521 | 1.6043047869  | 1.4570505403  |
| C | -8.799128372  | 3.0393858188  | 1.392719789   |
| H | -4.1341666255 | -2.2697171259 | -1.0412717153 |
| H | -6.0746460436 | -3.4949483906 | -1.0298893099 |
| H | -6.5328753706 | -2.5356393533 | 1.095243859   |
| H | -6.9779280533 | 0.1255905946  | -0.2943850612 |
| H | -5.2050667724 | 1.3910222369  | -0.763525382  |
| H | -3.6931328944 | 1.1180045641  | -2.6093002345 |
| H | -2.7792643738 | -0.1620306267 | -1.7793541836 |
| H | -4.3068251147 | -1.396914771  | -3.2553143767 |
| H | -8.0772088933 | -2.1087613401 | -1.6461582538 |
| H | -8.6701693495 | -1.1249603948 | 0.5435101566  |
| H | -2.9517171057 | 2.1541413855  | -0.1327897232 |
| H | -2.583049597  | 0.5649455556  | 0.5546079758  |
| H | -5.6250891961 | -0.019194361  | 2.3595500134  |
| H | -7.2887562986 | -0.5907316833 | 2.3510864842  |
| H | -6.6042618266 | -0.731299996  | -2.8947536894 |
| H | -3.8722557451 | 1.0285558004  | 2.2176199526  |
| H | -6.390585761  | 2.1366844163  | 1.8738308664  |
| H | -9.0314099226 | 3.2915737377  | 0.3546992529  |
| H | -9.7230100263 | 3.1388643716  | 1.9663276418  |
| H | -8.0599160667 | 3.7460020713  | 1.7759855434  |

calc\_2d conf\_9

|   |               |               |               |
|---|---------------|---------------|---------------|
| C | -6.2712963749 | -2.3002254859 | -1.090847792  |
| C | -7.1496761756 | -1.9365934586 | 0.1091257919  |
| C | -6.6978008432 | -0.5132287744 | 0.4331526607  |
| N | -5.2750723995 | -0.462663225  | 0.0914978998  |
| C | -4.9378057899 | -1.6590405373 | -0.7100214582 |
| C | -4.8328010131 | 0.7573166581  | -0.6188078767 |
| C | -4.4532400674 | 0.3159054571  | -2.0306276561 |
| C | -4.0681325241 | -1.1650816161 | -1.8895939913 |
| O | -6.8081412075 | -1.6785293838 | -2.2443930827 |
| O | -8.5160337996 | -2.0012491715 | -0.2485178363 |
| C | -3.6930699641 | 1.3961527453  | 0.1781071066  |
| C | -7.0063445699 | -0.0942684685 | 1.8716650999  |
| O | -4.196548031  | -1.9275054604 | -3.0589272139 |
| O | -4.0342650567 | 1.4415127038  | 1.5487840273  |
| N | -7.1509747146 | 1.3365597093  | 2.0138753326  |
| O | -9.2352064519 | 1.234287887   | 1.1437200305  |
| C | -8.2963552214 | 1.9094412168  | 1.558039405   |
| C | -8.3583019074 | 3.4172476428  | 1.6153492006  |
| H | -4.3810227188 | -2.3803826605 | -0.0992122969 |

|   |               |               |               |
|---|---------------|---------------|---------------|
| H | -6.1826598918 | -3.3824585916 | -1.2451034007 |
| H | -6.9431402181 | -2.619052822  | 0.946026584   |
| H | -7.2696744129 | 0.1478134915  | -0.2338147017 |
| H | -5.6650363359 | 1.4699394836  | -0.6305989644 |
| H | -5.3232499044 | 0.3832559304  | -2.688886068  |
| H | -3.6467671069 | 0.9123640676  | -2.4680819608 |
| H | -3.0141693527 | -1.2462484531 | -1.6065351514 |
| H | -7.7739746825 | -1.7335861977 | -2.1322560032 |
| H | -8.9695805875 | -1.2319296432 | 0.1306186164  |
| H | -3.5153546007 | 2.42285291    | -0.1528894917 |
| H | -2.7597224868 | 0.8306849993  | 0.0297399796  |
| H | -6.2186369672 | -0.4481408329 | 2.5422464789  |
| H | -7.948536303  | -0.5447595394 | 2.1961590325  |
| H | -5.1373119361 | -1.8945650397 | -3.2987768593 |
| H | -4.3051711656 | 0.5206460328  | 1.7196008552  |
| H | -6.3045134069 | 1.8835293461  | 2.1083868231  |
| H | -9.2018736755 | 3.7086582937  | 2.2457431246  |
| H | -7.4476556537 | 3.8753374572  | 2.007568256   |
| H | -8.554882481  | 3.8040033287  | 0.6124855003  |

calc\_2d conf\_10

|   |               |               |               |
|---|---------------|---------------|---------------|
| C | -6.0318715848 | -2.5578783302 | -0.2608322411 |
| C | -7.3589589265 | -1.817863771  | -0.5340352615 |
| C | -7.1205032273 | -0.4272230275 | 0.0579031048  |
| N | -5.6867917292 | -0.1651762392 | -0.1055892084 |
| C | -4.9583119155 | -1.4403923966 | -0.3122295381 |
| C | -5.3004095886 | 0.8061954218  | -1.1488355456 |
| C | -3.9752362027 | 0.2503063998  | -1.6652478451 |
| C | -4.1856179344 | -1.2528905841 | -1.6285639935 |
| O | -5.8303991338 | -3.613414479  | -1.1881642488 |
| O | -7.6277068212 | -1.828353798  | -1.9210379298 |
| C | -5.194100448  | 2.1963312317  | -0.519482282  |
| C | -7.5540037325 | -0.3654073774 | 1.5324739465  |
| O | -4.9625816696 | -1.6102716383 | -2.7665013942 |
| O | -4.4558346522 | 2.1237204819  | 0.6789510301  |
| N | -7.1925050461 | 0.8672782029  | 2.1898589491  |
| O | -8.7821681179 | 2.0901341718  | 1.1467817205  |
| C | -7.8228179557 | 2.0439478961  | 1.9016561691  |
| C | -7.2301887245 | 3.2595738106  | 2.5793190753  |
| H | -4.2286027917 | -1.5910667994 | 0.4931494242  |
| H | -6.0470955762 | -2.990947569  | 0.7457773775  |
| H | -8.2100760762 | -2.3245582105 | -0.0695965236 |
| H | -7.7030239466 | 0.3219190714  | -0.4847091086 |
| H | -6.0389064057 | 0.8364498376  | -1.9629271329 |
| H | -3.7292698085 | 0.5987100603  | -2.6704692726 |
| H | -3.1692090417 | 0.5368138936  | -0.9820648203 |
| H | -3.2464278521 | -1.8176897271 | -1.6322771578 |
| H | -6.6382414387 | -3.6095253589 | -1.7340320986 |
| H | -6.8408761661 | -1.4585411509 | -2.37367048   |
| H | -6.2041495303 | 2.5945006974  | -0.3416010985 |
| H | -4.680986636  | 2.8856737795  | -1.1972142895 |
| H | -7.1076033166 | -1.1873537795 | 2.1014144649  |
| H | -8.6411479655 | -0.4772036083 | 1.5805581097  |
| H | -5.0882237562 | -2.5704969821 | -2.6679338478 |
| H | -4.7362641904 | 1.2573867995  | 1.0335190317  |
| H | -6.3400172586 | 0.8982990681  | 2.7242410495  |
| H | -7.199315195  | 3.133198364   | 3.6659683513  |
| H | -6.2054414748 | 3.4162191251  | 2.2258974088  |



H -7.8381141627 4.1295965141 2.3355461053

calc\_2d conf\_11

C -5.7683826807 -1.657155312 0.5094066485  
C -7.1060694313 -0.9870048314 0.1410577704  
C -6.7013337097 0.4558461776 -0.1751138848  
N -5.349087722 0.3769300729 -0.7358370836  
C -4.7170644233 -0.9074792356 -0.3481158778  
C -5.1986967603 0.5972911926 -2.1857171723  
C -4.0597106008 -0.3470220802 -2.5659455547  
C -4.2864752159 -1.5555097809 -1.6750457594  
O -5.8046276156 -3.060384036 0.2756648956  
O -7.7026946196 -1.6573547461 -0.9517397714  
C -4.8871770792 2.0739940843 -2.4324601407  
C -6.6847950371 1.3732730182 1.0576716599  
O -5.3253690328 -2.336959051 -2.255562904  
O -3.8400102678 2.5010251103 -1.6005780356  
N -7.9766418951 1.5647671079 1.6763761744  
O -7.6653709388 -0.0049439955 3.2794844407  
C -8.3627877714 0.86663332 2.7802828844  
C -9.7127058131 1.2380012364 3.3537042874  
H -3.8172893573 -0.7160065781 0.2487961339  
H -5.5631036313 -1.490663329 1.571565409  
H -7.8208402373 -1.0512166779 0.9621894739  
H -7.3930698975 0.8691476939 -0.9183833722  
H -6.1143137084 0.3237698775 -2.7310904118  
H -4.0666480066 -0.6188552543 -3.6235627846  
H -3.1032129706 0.1274432159 -2.3257128939  
H -3.3878792782 -2.1708976411 -1.552553266  
H -6.7334233238 -3.2501760134 0.0566155423  
H -7.0262011569 -1.7239959666 -1.6580479236  
H -5.7999717925 2.6708100534 -2.2660725624  
H -4.580852824 2.2320500263 -3.4712742254  
H -6.2807045988 2.3450881262 0.7577738779  
H -6.0233219831 0.9602717171 1.822748691  
H -5.4572350289 -3.0538414801 -1.6078347122  
H -4.0376324425 2.0628411938 -0.7525248635  
H -8.5960254757 2.2633105811 1.299241285  
H -9.5721873426 1.5857622509 4.3800194535  
H -10.2392405263 2.0098841232 2.7870438196  
H -10.3348458036 0.3413258297 3.3975307526

calc\_2d conf\_12

C -5.7990352927 -2.0470213663 -0.2931833045  
C -6.51906256 -1.2639294865 0.7981493045  
C -6.51169215 0.1683547679 0.2265407871  
N -5.2112042537 0.2696494813 -0.4402405976  
C -4.6785464938 -1.09396489 -0.6822686215  
C -5.1890153305 1.0346632414 -1.707077602  
C -5.0176511464 -0.0116663286 -2.8117620138  
C -4.2176993932 -1.1440372523 -2.1589595064  
O -6.6953340101 -2.2372690729 -1.378773373  
O -7.7873260761 -1.8232610211 0.9900990728  
C -4.0668136982 2.0755581361 -1.6271264172  
C -6.6740692228 1.2982979375 1.2562790255  
O -4.35346826 -2.4036496905 -2.7619862691  
O -2.8783103227 1.5182677314 -1.1199741131

|   |                |               |               |
|---|----------------|---------------|---------------|
| N | -8.0471091328  | 1.676034083   | 1.5498273522  |
| O | -8.504530907   | -0.0598169173 | 2.9258682472  |
| C | -8.8527124947  | 0.9926299843  | 2.3881429545  |
| C | -10.2153864357 | 1.5883915593  | 2.6493260725  |
| H | -3.8298314064  | -1.2920307788 | -0.0152302387 |
| H | -5.4227700075  | -3.0136835194 | 0.0624925599  |
| H | -5.9228506731  | -1.2919305426 | 1.722098877   |
| H | -7.3393621621  | 0.2338790216  | -0.4972183158 |
| H | -6.1402004278  | 1.5696773707  | -1.8250507951 |
| H | -5.9982384501  | -0.4042625189 | -3.0984578653 |
| H | -4.5289743666  | 0.3819557967  | -3.7069055347 |
| H | -3.1534709366  | -0.9042398349 | -2.2026018044 |
| H | -7.5510726892  | -2.4516294458 | -0.971234473  |
| H | -8.1816255159  | -1.3642202199 | 1.7590696296  |
| H | -4.4024161122  | 2.9164489106  | -0.9969238729 |
| H | -3.8382713131  | 2.4781323338  | -2.6182932016 |
| H | -6.1789393231  | 2.1923168018  | 0.870569004   |
| H | -6.1761154546  | 1.0284704386  | 2.1927728408  |
| H | -5.290014789   | -2.6454713705 | -2.672947914  |
| H | -3.1580428188  | 1.0952852162  | -0.2917403339 |
| H | -8.4061821245  | 2.5148242241  | 1.1238569787  |
| H | -10.3976500646 | 2.529227811   | 2.1250884687  |
| H | -10.9785864753 | 0.8630662836  | 2.3576573482  |
| H | -10.3204177093 | 1.7539531252  | 3.7241176444  |

calc\_2d conf\_13

|   |               |               |               |
|---|---------------|---------------|---------------|
| C | -5.6439979524 | -2.5800717405 | -0.5602794989 |
| C | -7.0476137636 | -2.0315615209 | -0.1714249164 |
| C | -6.8367820144 | -0.5414372622 | 0.1461219586  |
| N | -5.4038968851 | -0.2707490757 | -0.0859348504 |
| C | -4.8211601579 | -1.3361781826 | -0.9099360584 |
| C | -5.0963045309 | 1.0041788213  | -0.7512550404 |
| C | -4.8123149571 | 0.6833533945  | -2.2370765942 |
| C | -4.8848649859 | -0.8413876374 | -2.3680651199 |
| O | -5.7335058789 | -3.5125225369 | -1.62057079   |
| O | -7.9754650402 | -2.2588823974 | -1.2111655729 |
| C | -3.9032516593 | 1.6425960368  | -0.0317365133 |
| C | -7.2510722598 | -0.1776521268 | 1.5714123935  |
| O | -6.1073303331 | -1.1952460479 | -3.0109568648 |
| O | -4.0853881757 | 1.5807624919  | 1.3668252138  |
| N | -7.0681040396 | 1.2204969561  | 1.8751239301  |
| O | -9.2677218966 | 1.6358468555  | 2.2764213333  |
| C | -8.1117939784 | 2.0264656737  | 2.2205748511  |
| C | -7.7349208328 | 3.4582276623  | 2.5396749287  |
| H | -3.7656312498 | -1.4724077073 | -0.6431742687 |
| H | -5.1929557826 | -3.0689388005 | 0.3111785322  |
| H | -7.4461875715 | -2.5749522791 | 0.689215577   |
| H | -7.4620264696 | 0.0428290336  | -0.5438656317 |
| H | -5.9568472703 | 1.668766556   | -0.6346884812 |
| H | -5.5458969087 | 1.1318023986  | -2.9103391373 |
| H | -3.8259947353 | 1.0528618108  | -2.5360736967 |
| H | -4.0504508644 | -1.2403864608 | -2.9558638211 |
| H | -6.6903400598 | -3.6890452135 | -1.70191236   |
| H | -7.6945407764 | -1.6760245882 | -1.9432718073 |
| H | -3.8008839578 | 2.6953440349  | -0.3075379214 |
| H | -2.971011263  | 1.1312662461  | -0.3206684629 |
| H | -6.6774159799 | -0.7960417787 | 2.2757144297  |
| H | -8.3136847937 | -0.3878450412 | 1.7163016347  |

|   |               |               |               |
|---|---------------|---------------|---------------|
| H | -6.0473515848 | -2.1642493093 | -3.0817664738 |
| H | -4.3083138953 | 0.6413077929  | 1.508094567   |
| H | -6.1277339302 | 1.5990547399  | 1.8580767881  |
| H | -8.0022190707 | 3.6669873134  | 3.5787027923  |
| H | -6.6743275358 | 3.6777496431  | 2.3953017674  |
| H | -8.3306969588 | 4.1256822455  | 1.9128231841  |

calc\_2d conf\_14

|   |               |               |               |
|---|---------------|---------------|---------------|
| C | -6.2417416242 | -2.4163489056 | -0.5422873218 |
| C | -7.5760802063 | -1.734839331  | -0.2368565563 |
| C | -7.295111789  | -0.2671922677 | -0.6364739634 |
| N | -5.8784809381 | -0.0588782656 | -0.3549313914 |
| C | -5.2683163089 | -1.3597281295 | -0.0099137577 |
| C | -5.0698159833 | 0.5630351949  | -1.4038446808 |
| C | -3.6632638059 | 0.1303365064  | -1.0067348407 |
| C | -3.8228822304 | -1.3155596714 | -0.5432374427 |
| O | -6.2414158896 | -2.5604786045 | -1.9470292258 |
| O | -8.6684057251 | -2.3013194067 | -0.9035379768 |
| C | -5.2249089965 | 2.0828357311  | -1.4632261006 |
| C | -8.2227688197 | 0.7295625933  | 0.0626045463  |
| O | -3.6726573516 | -2.2583150742 | -1.6099646175 |
| O | -4.7962489917 | 2.7366723249  | -0.3060805961 |
| N | -8.1142342703 | 0.7237450825  | 1.5059434119  |
| O | -6.7726001256 | 2.5502015517  | 1.6752146768  |
| C | -7.3966823821 | 1.6354665495  | 2.2028061635  |
| C | -7.4221299437 | 1.4831368851  | 3.7074419971  |
| H | -5.2376894379 | -1.4723779932 | 1.0833032945  |
| H | -6.1311494589 | -3.3872906595 | -0.0402677916 |
| H | -7.7834262598 | -1.8051817851 | 0.8373509879  |
| H | -7.4915512715 | -0.1886704401 | -1.7177406784 |
| H | -5.3284099041 | 0.1514354127  | -2.3981975806 |
| H | -2.9334687368 | 0.2321761264  | -1.8173274327 |
| H | -3.3402757607 | 0.7649491589  | -0.1763698433 |
| H | -3.1076945419 | -1.5793221703 | 0.2445058154  |
| H | -5.3086169062 | -2.6407269921 | -2.2126700551 |
| H | -8.3284801776 | -2.5238357886 | -1.7857181502 |
| H | -6.2680540802 | 2.3318011765  | -1.7158113767 |
| H | -4.6105583629 | 2.4533945081  | -2.2927671472 |
| H | -9.2559050893 | 0.4920873112  | -0.2126649982 |
| H | -8.0099570467 | 1.7479969939  | -0.2662173861 |
| H | -2.8324650239 | -2.0816367484 | -2.0505958764 |
| H | -5.4653921363 | 2.5864895085  | 0.3885504969  |
| H | -8.629797894  | 0.0298471249  | 2.0216490247  |
| H | -8.0478808759 | 0.6602837245  | 4.0617690943  |
| H | -6.3993363242 | 1.3286436022  | 4.0594802967  |
| H | -7.7781453294 | 2.4176051658  | 4.146846982   |

calc\_2d conf\_15

|   |               |               |               |
|---|---------------|---------------|---------------|
| C | -5.5292574003 | -2.1852861326 | 0.0560162221  |
| C | -6.3275581143 | -1.224666259  | 0.9783098443  |
| C | -6.388631898  | 0.0858236889  | 0.188821423   |
| N | -5.0841415139 | 0.1353033471  | -0.4701400812 |
| C | -4.6809600614 | -1.2501753525 | -0.8183748892 |
| C | -4.980320502  | 0.9754453993  | -1.6851932645 |
| C | -4.3062388623 | 0.0661362764  | -2.7219413172 |
| C | -4.8129443022 | -1.3176781771 | -2.3493516338 |
| O | -6.4356126961 | -2.974918433  | -0.6898489515 |

|   |                |               |               |
|---|----------------|---------------|---------------|
| O | -7.5783876783  | -1.8032936057 | 1.2686093432  |
| C | -4.1625859119  | 2.2290913081  | -1.3659318765 |
| C | -6.5633196817  | 1.3523184606  | 1.0374047894  |
| O | -6.1506349731  | -1.3901957188 | -2.7807333582 |
| O | -2.9986303431  | 1.8859182715  | -0.655696192  |
| N | -7.5586809796  | 1.3188417463  | 2.1027383984  |
| O | -9.2494279838  | 0.3312703137  | 0.9660498567  |
| C | -8.8382382766  | 0.912353305   | 1.9727052171  |
| C | -9.7479627027  | 1.1719757649  | 3.1495576013  |
| H | -3.6198061348  | -1.3835997376 | -0.572080976  |
| H | -4.8912670404  | -2.853157301  | 0.6467010826  |
| H | -5.7707587672  | -1.0677914615 | 1.9115069847  |
| H | -7.2025595835  | 0.0133440859  | -0.5462395284 |
| H | -5.9825003804  | 1.2547633383  | -2.0359745273 |
| H | -4.5790817855  | 0.3311636812  | -3.745656879  |
| H | -3.2181623849  | 0.1258135489  | -2.6142250757 |
| H | -4.2023258795  | -2.1289288673 | -2.772451349  |
| H | -7.2469557639  | -2.9656753255 | -0.1402956084 |
| H | -8.2804664834  | -1.1643503913 | 1.0238212446  |
| H | -4.7773954737  | 2.945868925   | -0.7967575149 |
| H | -3.8558315982  | 2.729044791   | -2.290131563  |
| H | -6.7756372694  | 2.1967332565  | 0.3703601229  |
| H | -5.6018831501  | 1.5486841377  | 1.5183920286  |
| H | -6.5434160479  | -2.1228960758 | -2.2712632125 |
| H | -3.3189373721  | 1.2191466272  | -0.0215598224 |
| H | -7.3133503484  | 1.8049024175  | 2.9503808977  |
| H | -9.2741450385  | 1.7177673628  | 3.9685286392  |
| H | -10.6143467884 | 1.7368483493  | 2.7979084258  |
| H | -10.1156388287 | 0.2140544353  | 3.5250354993  |

calc\_2d conf\_16

|   |                |               |               |
|---|----------------|---------------|---------------|
| C | -5.822369136   | -2.4696726217 | -0.5847750635 |
| C | -6.4488669734  | -1.7106828566 | 0.6056345102  |
| C | -6.3989528487  | -0.2466773739 | 0.1495435967  |
| N | -5.0588953882  | -0.1742164344 | -0.42111217   |
| C | -4.8061768443  | -1.4482722258 | -1.1377597359 |
| C | -4.7557660106  | 0.953603991   | -1.3220944166 |
| C | -4.1316633966  | 0.2943555452  | -2.563148469  |
| C | -4.8068526185  | -1.0675694631 | -2.6201651459 |
| O | -6.8568562523  | -2.8772131762 | -1.4592749329 |
| O | -7.729511688   | -2.1897564381 | 0.9149229438  |
| C | -3.7911917099  | 1.9159273263  | -0.6266022778 |
| C | -6.6278627345  | 0.7485515223  | 1.2777811557  |
| O | -6.1631983887  | -0.9214052844 | -3.0558392365 |
| O | -2.7038803041  | 1.2053598855  | -0.0870467505 |
| N | -7.959141643   | 0.589939261   | 1.8142968012  |
| O | -8.3563271376  | 2.8133209425  | 2.0318318267  |
| C | -8.7384360083  | 1.6563714128  | 2.1331835058  |
| C | -10.1244455148 | 1.3145770058  | 2.6400612466  |
| H | -3.7903310924  | -1.7950747943 | -0.9118525747 |
| H | -5.3233591189  | -3.3844664448 | -0.2550117703 |
| H | -5.8187623647  | -1.8204399303 | 1.4959817968  |
| H | -7.179335294   | -0.0923409717 | -0.6172204104 |
| H | -5.6812051634  | 1.4784926092  | -1.5957385498 |
| H | -4.2830256422  | 0.8813134122  | -3.4743235576 |
| H | -3.0544542733  | 0.174372111   | -2.4065637214 |
| H | -4.2838090942  | -1.8034547725 | -3.2421433257 |
| H | -6.9157161459  | -2.2224099094 | -2.1803275188 |

|   |                |               |               |
|---|----------------|---------------|---------------|
| H | -8.0581257563  | -2.5409125727 | 0.0652181551  |
| H | -4.325470574   | 2.4807962546  | 0.1513769344  |
| H | -3.3882810787  | 2.6397338338  | -1.3418527718 |
| H | -6.5451325881  | 1.7834286247  | 0.9351854424  |
| H | -5.8611370164  | 0.5965186716  | 2.0510158919  |
| H | -6.1659279407  | -0.6847771137 | -3.9917201757 |
| H | -3.1299716617  | 0.4880427418  | 0.4128869383  |
| H | -8.3315397634  | -0.3498741673 | 1.8480091297  |
| H | -10.8599415959 | 1.8587733378  | 2.0433933724  |
| H | -10.3549123262 | 0.2468831805  | 2.6097565416  |
| H | -10.2181669121 | 1.6668548812  | 3.6704927852  |

calc\_2d conf\_17

|   |                |               |               |
|---|----------------|---------------|---------------|
| C | -6.0924638137  | -2.154971053  | -0.2477241113 |
| C | -6.9269471053  | -1.2566389283 | 0.6732732929  |
| C | -6.4827886149  | 0.1741011958  | 0.2746216687  |
| N | -5.1826467546  | 0.03340915    | -0.3948430934 |
| C | -4.7801080668  | -1.3834457328 | -0.3350062018 |
| C | -5.1205129384  | 0.4716051039  | -1.8011159162 |
| C | -3.9083191988  | -0.2912871296 | -2.3269950813 |
| C | -3.88590536    | -1.6406325259 | -1.5774899933 |
| O | -6.7354126917  | -2.1846000519 | -1.5082352494 |
| O | -8.2903079551  | -1.522030552  | 0.442826279   |
| C | -4.9625262224  | 1.9912736375  | -1.829552436  |
| C | -6.3085638884  | 1.1349215292  | 1.4571233754  |
| O | -4.2740449164  | -2.7525258873 | -2.3438114862 |
| O | -3.9375412875  | 2.399750133   | -0.9560550328 |
| N | -7.4024079655  | 1.2040923958  | 2.4198957099  |
| O | -9.1756836014  | 1.0097496959  | 1.0124401677  |
| C | -8.7227554494  | 1.2220236878  | 2.1389304388  |
| C | -9.6459180568  | 1.5002349915  | 3.302460067   |
| H | -4.2235242595  | -1.5719854037 | 0.5930679611  |
| H | -5.9662994939  | -3.1702163427 | 0.1485073492  |
| H | -6.6686127481  | -1.4555265506 | 1.7244087457  |
| H | -7.2184874525  | 0.5842782293  | -0.4221445085 |
| H | -6.0283209663  | 0.1817807939  | -2.349879137  |
| H | -3.943472693   | -0.4548414238 | -3.4061926678 |
| H | -3.0058661406  | 0.2837736612  | -2.0962574348 |
| H | -2.866220362   | -1.8690350215 | -1.2582170472 |
| H | -7.6866406795  | -2.1203993986 | -1.2975762025 |
| H | -8.7782257869  | -0.6789588663 | 0.5413852915  |
| H | -5.9220292383  | 2.465088393   | -1.5618309503 |
| H | -4.7092998267  | 2.3267908554  | -2.8405029605 |
| H | -6.0924986955  | 2.1355018515  | 1.0633494021  |
| H | -5.4247550978  | 0.813217339   | 2.015762203   |
| H | -5.2329135994  | -2.6872070171 | -2.485800733  |
| H | -3.9651489729  | 1.7284291273  | -0.2493491502 |
| H | -7.1377003417  | 1.4244227445  | 3.3669151614  |
| H | -9.1345148248  | 1.6354401641  | 4.258067379   |
| H | -10.2221678793 | 2.4010955564  | 3.0773811404  |
| H | -10.3564470542 | 0.6753216493  | 3.3901637611  |

calc\_2d conf\_18

|   |               |               |               |
|---|---------------|---------------|---------------|
| C | -5.8083007856 | -2.3600850022 | -0.2509769972 |
| C | -6.4452268333 | -1.4665821354 | 0.8246668733  |
| C | -6.3423803066 | -0.0583361286 | 0.2184453318  |
| N | -4.9900377057 | -0.0931745462 | -0.3260080259 |

|   |                |               |               |
|---|----------------|---------------|---------------|
| C | -4.7915092912  | -1.4290003987 | -0.9315026545 |
| C | -4.6364377735  | 0.9287487294  | -1.3239001344 |
| C | -4.152149915   | 0.1404004445  | -2.5584095247 |
| C | -4.8907226139  | -1.1855657393 | -2.4485814786 |
| O | -6.8144814206  | -2.82392146   | -1.1410971631 |
| O | -7.7345454219  | -1.9444766026 | 1.0799457325  |
| C | -3.5651292684  | 1.8767168694  | -0.7894651686 |
| C | -6.5054404893  | 1.0897913001  | 1.2230250468  |
| O | -6.206834349   | -0.9513756465 | -2.8876400014 |
| O | -3.2239847278  | 2.8852487715  | -1.7177168451 |
| N | -7.8733625766  | 1.542536249   | 1.412588227   |
| O | -8.483589123   | -0.0694985398 | 2.8790415234  |
| C | -8.7532665839  | 0.9541468502  | 2.2468244636  |
| C | -10.1007239246 | 1.6210399612  | 2.383671032   |
| H | -3.7732794017  | -1.7793473524 | -0.7161145844 |
| H | -5.3159329254  | -3.2312644111 | 0.1957550023  |
| H | -5.8195258343  | -1.4941927995 | 1.7278846458  |
| H | -7.1064457429  | 0.0470312514  | -0.5709719141 |
| H | -5.5224126709  | 1.5171692253  | -1.5983330176 |
| H | -4.3840290545  | 0.6399668357  | -3.5014882664 |
| H | -3.0682365744  | -0.030405175  | -2.5067991653 |
| H | -4.4072224742  | -1.9896157624 | -3.0236372389 |
| H | -7.6270864947  | -2.8424624593 | -0.6024486773 |
| H | -8.1011689742  | -1.4177039626 | 1.8214455482  |
| H | -2.688596362   | 1.2855921454  | -0.4811003778 |
| H | -3.9222773602  | 2.401121074   | 0.1009745027  |
| H | -5.9407518526  | 1.9564811621  | 0.8736407981  |
| H | -6.0954114737  | 0.8033469763  | 2.19581766    |
| H | -6.7332281565  | -1.6805829833 | -2.5094086944 |
| H | -2.8205670103  | 2.453915183   | -2.4813583172 |
| H | -8.1773855977  | 2.3486489726  | 0.8910221779  |
| H | -10.8762512852 | 0.9143940296  | 2.0786862193  |
| H | -10.2677605348 | 1.8498353552  | 3.4387457599  |
| H | -10.2033071099 | 2.5384597191  | 1.7997777023  |

calc\_2d conf\_19

|   |               |               |               |
|---|---------------|---------------|---------------|
| C | -6.1688490112 | -2.5258952433 | -0.9973415445 |
| C | -7.2379841881 | -2.0304222508 | -0.0241756826 |
| C | -6.9220877869 | -0.5171182075 | 0.1003324569  |
| N | -5.4699345061 | -0.4009885561 | -0.1619033292 |
| C | -4.9494547711 | -1.7452836458 | -0.5013522242 |
| C | -5.0554353749 | 0.521227296   | -1.2272199764 |
| C | -3.6602784595 | 0.0015481131  | -1.5681407294 |
| C | -3.7682210215 | -1.5231591124 | -1.4673392775 |
| O | -6.6306216469 | -2.1152815266 | -2.2676585166 |
| O | -8.5428325884 | -2.3078223729 | -0.4357569254 |
| C | -5.0518362039 | 1.947073743   | -0.6744698725 |
| C | -7.3536839592 | 0.0115981339  | 1.4660563751  |
| O | -4.0539139863 | -2.1510140813 | -2.7170514998 |
| O | -4.4839891732 | 1.9530489429  | 0.622163509   |
| N | -7.2408666527 | 1.4411757458  | 1.6256890438  |
| O | -9.4592563355 | 1.8005420353  | 1.9819872807  |
| C | -8.3207591049 | 2.2311609208  | 1.8828120254  |
| C | -8.0081215729 | 3.7049509894  | 2.0466574382  |
| H | -4.592458421  | -2.2391288496 | 0.4116459638  |
| H | -6.0218221439 | -3.6127553833 | -0.9546644234 |
| H | -7.1042113988 | -2.5141397561 | 0.9508751292  |
| H | -7.4819675921 | 0.0136592487  | -0.6797744136 |

|   |               |               |               |
|---|---------------|---------------|---------------|
| H | -5.7181601305 | 0.45865167    | -2.1029075051 |
| H | -3.3142406024 | 0.3286990066  | -2.553343346  |
| H | -2.9501093448 | 0.3734043921  | -0.8220761118 |
| H | -2.8504301813 | -1.9651620747 | -1.0632016721 |
| H | -5.877508905  | -2.2120356223 | -2.8737518313 |
| H | -8.5493669538 | -2.141083635  | -1.3917342955 |
| H | -6.0799622841 | 2.3317557397  | -0.6429221106 |
| H | -4.4664816778 | 2.6097636182  | -1.3206286087 |
| H | -6.7692503994 | -0.4994825336 | 2.2435956441  |
| H | -8.4081868064 | -0.2333887898 | 1.6182626377  |
| H | -3.3151809342 | -1.9858785362 | -3.3155672332 |
| H | -4.5539147212 | 1.0120098992  | 0.8926351424  |
| H | -6.3203786666 | 1.861462813   | 1.5682916964  |
| H | -8.2827182802 | 4.010845607   | 3.0594733178  |
| H | -6.9589191045 | 3.9558545338  | 1.8720730118  |
| H | -8.6346051089 | 4.2746077287  | 1.3564304571  |

calc\_2d conf\_20

|   |                |               |               |
|---|----------------|---------------|---------------|
| C | -5.9762194467  | -2.2194552154 | -0.7668002244 |
| C | -6.6819883319  | -1.6276166645 | 0.4512249744  |
| C | -6.5117986478  | -0.1161879859 | 0.2249364738  |
| N | -5.1584219397  | 0.0021390286  | -0.3190590926 |
| C | -4.7498386797  | -1.3094806043 | -0.8793131956 |
| C | -4.9648458005  | 1.0511684106  | -1.3378679581 |
| C | -4.8769379736  | 0.298829312   | -2.6716352432 |
| C | -4.2309665478  | -1.034687818  | -2.3023578258 |
| O | -6.898340861   | -2.0778590487 | -1.8305945824 |
| O | -8.020132063   | -2.0412721257 | 0.5789327019  |
| C | -3.7165650493  | 1.8613882687  | -0.9826850955 |
| C | -6.7069943294  | 0.7143274519  | 1.4859554284  |
| O | -4.5830798318  | -2.1260414702 | -3.1516476564 |
| O | -2.6300071698  | 1.0207427465  | -0.6601721887 |
| N | -8.0596162466  | 0.5702787555  | 1.9736474462  |
| O | -8.2803236008  | 2.7341700836  | 2.6175474692  |
| C | -8.756939272   | 1.6157699826  | 2.4901929828  |
| C | -10.1784670389 | 1.3006006051  | 2.9095222717  |
| H | -3.9490514381  | -1.7495529495 | -0.2713852188 |
| H | -5.6977325825  | -3.2715919737 | -0.6309316052 |
| H | -6.1627590491  | -1.9276156292 | 1.368203193   |
| H | -7.2691834717  | 0.1883629831  | -0.5156714636 |
| H | -5.8262966695  | 1.7290834425  | -1.3318876945 |
| H | -5.8864111965  | 0.0985911146  | -3.0443733591 |
| H | -4.3233626058  | 0.8480573794  | -3.4394934441 |
| H | -3.1426332224  | -0.9282858318 | -2.2748206808 |
| H | -6.4028590788  | -2.2965938763 | -2.6389713645 |
| H | -8.3584287703  | -2.0803191048 | -0.3311070873 |
| H | -3.9535496759  | 2.5310072902  | -0.1429214449 |
| H | -3.4009311687  | 2.4825347647  | -1.8261640822 |
| H | -6.5408809394  | 1.7780222037  | 1.2958380102  |
| H | -5.9701444626  | 0.4012321684  | 2.2389945998  |
| H | -4.1879472448  | -1.9712606116 | -4.0184185195 |
| H | -2.953763858   | 0.4965542826  | 0.0889822201  |
| H | -8.507203656   | -0.3254843703 | 1.8331414773  |
| H | -10.2760869678 | 1.4809102969  | 3.9830004205  |
| H | -10.8550622774 | 1.9921183966  | 2.4021433305  |
| H | -10.4862288344 | 0.2744163121  | 2.6940160275  |

calc\_2d conf\_21

|   |               |               |               |
|---|---------------|---------------|---------------|
| C | -5.9101259237 | -2.4665492471 | -0.2756871712 |
| C | -7.3324875582 | -1.9380036472 | -0.5833534188 |
| C | -7.2392114508 | -0.4163720686 | -0.357677574  |
| N | -5.8176584155 | -0.1106913777 | -0.1253403631 |
| C | -4.9981853174 | -1.2606121675 | -0.5243692607 |
| C | -5.2682035764 | 1.0428032699  | -0.8433843626 |
| C | -4.7480724588 | 0.5014304373  | -2.1923445378 |
| C | -4.5291994048 | -1.001961218  | -1.9838932897 |
| O | -5.5982213429 | -3.6053607362 | -1.0590726491 |
| O | -7.7362528307 | -2.3118189241 | -1.8824798409 |
| C | -4.1526494678 | 1.6829264657  | -0.0184051462 |
| C | -8.1133627085 | 0.0082003253  | 0.8270870786  |
| O | -5.2886576991 | -1.7118363975 | -2.9611206457 |
| O | -4.5964113604 | 2.1582827845  | 1.2208466698  |
| N | -8.0998157881 | 1.4244762004  | 1.1021206123  |
| O | -6.8089706946 | 1.2621022398  | 2.957398907   |
| C | -7.4407822847 | 1.9544771541  | 2.1696760582  |
| C | -7.4979007913 | 3.4576451436  | 2.2936771277  |
| H | -4.1080256353 | -1.314062004  | 0.1120367666  |
| H | -5.8448715306 | -2.7341617594 | 0.7849900062  |
| H | -8.0681804243 | -2.3964318056 | 0.0836116576  |
| H | -7.6132917924 | 0.0785461228  | -1.2675322812 |
| H | -6.0567003796 | 1.7906785851  | -0.9690551714 |
| H | -5.4920816959 | 0.6241882779  | -2.9845123149 |
| H | -3.8387885914 | 1.0130640355  | -2.5211613674 |
| H | -3.475526164  | -1.2818498843 | -2.096665417  |
| H | -6.4375537405 | -3.8308915786 | -1.5013241259 |
| H | -7.0769205214 | -1.9202426573 | -2.4955178034 |
| H | -3.7528301114 | 2.5436416012  | -0.5648448303 |
| H | -3.3223554291 | 0.9650415717  | 0.0962221092  |
| H | -7.7520432631 | -0.4803746912 | 1.7350356375  |
| H | -9.1453470101 | -0.3149085742 | 0.6430984315  |
| H | -5.1593960962 | -2.647984142  | -2.722751473  |
| H | -5.0651751604 | 1.4345209703  | 1.670185301   |
| H | -8.6087738084 | 2.0431488919  | 0.4914595379  |
| H | -6.5341843769 | 3.8473960411  | 1.9543488779  |
| H | -8.2983336054 | 3.919065083   | 1.709107973   |
| H | -7.61745159   | 3.7204776793  | 3.3455902923  |

calc\_2d conf\_22

|   |               |               |               |
|---|---------------|---------------|---------------|
| C | -6.2090323806 | -2.3729013744 | -0.7122601086 |
| C | -6.9617465513 | -1.6340572537 | 0.395344118   |
| C | -6.526249093  | -0.1689883179 | 0.1715590406  |
| N | -5.1260418209 | -0.279605731  | -0.239047723  |
| C | -4.8419538268 | -1.6858730312 | -0.616879644  |
| C | -4.6518448697 | 0.6052679014  | -1.3073297598 |
| C | -3.4534877292 | -0.1698183227 | -1.8499557315 |
| C | -3.9046819972 | -1.6276033546 | -1.8371373966 |
| O | -6.9541364851 | -2.0925954654 | -1.8771377826 |
| O | -8.3527307269 | -1.8261941942 | 0.3477701821  |
| C | -4.2660219953 | 1.9668668852  | -0.7293268379 |
| C | -6.729711859  | 0.6912796458  | 1.4157762026  |
| O | -4.6214422541 | -1.9793705235 | -3.0206610586 |
| O | -3.4116157123 | 1.80768905    | 0.3745528214  |
| N | -8.1355533145 | 0.7696271712  | 1.7405431214  |
| O | -8.0984460349 | 2.9711382065  | 2.290095621   |
| C | -8.7216772788 | 1.9317726636  | 2.1338197055  |



|   |                |               |               |
|---|----------------|---------------|---------------|
| C | -10.2149230276 | 1.851755803   | 2.3774295015  |
| H | -4.2993774943  | -2.1765666618 | 0.2027917554  |
| H | -6.1401818545  | -3.4547007249 | -0.5360319423 |
| H | -6.6262602046  | -1.9757570981 | 1.3810206152  |
| H | -7.1412059894  | 0.2389259493  | -0.6457996157 |
| H | -5.4156257171  | 0.7355422833  | -2.0925190178 |
| H | -3.1404725031  | 0.1638048725  | -2.8446204827 |
| H | -2.6119726209  | -0.0288934393 | -1.1643210753 |
| H | -3.0666304996  | -2.3242038995 | -1.7180917476 |
| H | -6.3423589165  | -2.1438997527 | -2.6307711188 |
| H | -8.5738249982  | -1.796721983  | -0.5982917587 |
| H | -5.174159394   | 2.527100548   | -0.4607518272 |
| H | -3.7333594626  | 2.5568114693  | -1.4820730815 |
| H | -6.3761013336  | 1.7147653464  | 1.2740505719  |
| H | -6.1523687236  | 0.2611698592  | 2.2472615041  |
| H | -4.0551908522  | -1.8150574185 | -3.7843835455 |
| H | -3.7871469408  | 1.0489591518  | 0.8549366091  |
| H | -8.6988274472  | -0.0494922542 | 1.5556312994  |
| H | -10.7101407129 | 2.612586429   | 1.7697283528  |
| H | -10.6485064228 | 0.8741907439  | 2.1525438663  |
| H | -10.4129909548 | 2.0940468212  | 3.4245363673  |

calc\_2d conf\_23

|   |               |               |               |
|---|---------------|---------------|---------------|
| C | -5.5629187627 | -2.0753975513 | 0.0414990775  |
| C | -6.8704985612 | -1.2828870057 | 0.3223956183  |
| C | -6.5388658965 | 0.1742307053  | -0.0456719756 |
| N | -5.1786300018 | 0.1710739246  | -0.6045331558 |
| C | -4.7713784193 | -1.1976500146 | -0.9362728146 |
| C | -4.9624415658 | 0.9939353544  | -1.801192542  |
| C | -4.9735092143 | 0.0345256018  | -3.0139422077 |
| C | -5.0544634994 | -1.3848420625 | -2.442104673  |
| O | -5.8441702982 | -3.3688525169 | -0.4646408039 |
| O | -7.945825551  | -1.8195539761 | -0.4231591367 |
| C | -3.6389504643 | 1.7428607912  | -1.6455847302 |
| C | -6.5913010052 | 1.1416467503  | 1.1415234278  |
| O | -6.354552645  | -1.9134079626 | -2.6968132745 |
| O | -3.6013195113 | 2.4328284837  | -0.4243472569 |
| N | -7.9147002813 | 1.3120145376  | 1.6950289334  |
| O | -7.6174316468 | -0.1277355234 | 3.4223717212  |
| C | -8.331913209  | 0.6553906659  | 2.8134185712  |
| C | -9.7500849399 | 0.9488813627  | 3.2517513478  |
| H | -3.6914349724 | -1.3085290871 | -0.7784634084 |
| H | -4.9924792341 | -2.1706319972 | 0.9721496825  |
| H | -7.1628261242 | -1.3757137857 | 1.369302398   |
| H | -7.2780594066 | 0.5008130562  | -0.7939177292 |
| H | -5.760681123  | 1.7413657741  | -1.8571688522 |
| H | -5.8321332441 | 0.1977828801  | -3.6690421596 |
| H | -4.0718507695 | 0.162403253   | -3.6217034033 |
| H | -4.3124500739 | -2.0508164471 | -2.897157148  |
| H | -6.8045773918 | -3.4740332095 | -0.3285054261 |
| H | -7.7169494032 | -1.6686437111 | -1.3622833728 |
| H | -3.5223135612 | 2.4789068942  | -2.4468368281 |
| H | -2.802244426  | 1.0283255355  | -1.7315857092 |
| H | -6.1982000657 | 2.1145950655  | 0.8272291493  |
| H | -5.9527697199 | 0.7647304633  | 1.9439570607  |
| H | -6.3119342007 | -2.802143967  | -2.2988479425 |
| H | -3.8784725202 | 1.7635053218  | 0.2241384485  |
| H | -8.5632749942 | 1.917310258   | 1.2186285446  |

|   |                |              |              |
|---|----------------|--------------|--------------|
| H | -9.7446459828  | 1.1736386619 | 4.3199887262 |
| H | -10.2192147425 | 1.7760877233 | 2.7132309847 |
| H | -10.3545325709 | 0.0489857535 | 3.1101608585 |

calc\_2d conf\_24

|   |               |               |               |
|---|---------------|---------------|---------------|
| C | -5.9161705488 | -2.6309320839 | -1.0348949114 |
| C | -6.8598739484 | -2.1869187109 | 0.1096384641  |
| C | -6.6906515814 | -0.6620525708 | 0.160069946   |
| N | -5.2343457932 | -0.5369586957 | -0.0257992292 |
| C | -4.8498659528 | -1.5148865492 | -1.067593382  |
| C | -4.6952880798 | 0.7779475333  | -0.4221324964 |
| C | -4.0249474578 | 0.577197197   | -1.7979123273 |
| C | -4.6802777831 | -0.6831620377 | -2.3459050827 |
| O | -6.6501626012 | -2.8206726807 | -2.2276912769 |
| O | -8.1657580226 | -2.6326190431 | -0.0805711147 |
| C | -3.6999614074 | 1.2594148243  | 0.6363110449  |
| C | -7.2326961504 | -0.0970551059 | 1.4673010036  |
| O | -5.9745281032 | -0.3713236344 | -2.8696186317 |
| O | -4.2284462186 | 1.1211511863  | 1.9374851576  |
| N | -7.1129093736 | 1.3334313524  | 1.6254955159  |
| O | -9.2911887144 | 1.796112203   | 1.1698990877  |
| C | -8.1726418572 | 2.174163886   | 1.4831610052  |
| C | -7.8712408254 | 3.6362912827  | 1.7475850936  |
| H | -3.8610492543 | -1.9298771779 | -0.8361525439 |
| H | -5.4643587336 | -3.6004952101 | -0.8144045572 |
| H | -6.4885149977 | -2.5958505891 | 1.0586966586  |
| H | -7.2450334677 | -0.2041332476 | -0.6736443702 |
| H | -5.5215651456 | 1.492529347   | -0.4934284793 |
| H | -4.1553444325 | 1.4348448568  | -2.4644718409 |
| H | -2.9468211807 | 0.4125639088  | -1.6828932421 |
| H | -4.0780883097 | -1.2002123956 | -3.1024189284 |
| H | -6.7061393532 | -1.9557903035 | -2.6758485634 |
| H | -8.2271509066 | -2.8013647244 | -1.0384310867 |
| H | -3.4556952269 | 2.3160075647  | 0.4943621131  |
| H | -2.7648523929 | 0.6850379623  | 0.5459495501  |
| H | -6.7343289602 | -0.5940179097 | 2.3103603454  |
| H | -8.2969137183 | -0.3412417355 | 1.5120200447  |
| H | -5.8662578759 | 0.1442403819  | -3.6787851377 |
| H | -4.5127618686 | 0.1899559743  | 1.9628211796  |
| H | -6.2032482527 | 1.6876169751  | 1.8958088976  |
| H | -6.8208618718 | 3.838034347   | 1.9722490921  |
| H | -8.1716902249 | 4.2213311398  | 0.8751809933  |
| H | -8.4833694067 | 3.9726924829  | 2.5882020091  |

calc\_2d conf\_25

|   |               |               |               |
|---|---------------|---------------|---------------|
| C | -5.5780346943 | -1.8133931026 | 0.4026930847  |
| C | -7.0759386899 | -1.4806999631 | 0.1328518883  |
| C | -7.069056912  | -0.1219523968 | -0.5933815804 |
| N | -5.6742702187 | 0.3323646102  | -0.5748807082 |
| C | -4.7940806619 | -0.8354901699 | -0.4773658015 |
| C | -5.2458074432 | 1.0774711593  | -1.762379434  |
| C | -4.6342300895 | 0.0386024429  | -2.7321644018 |
| C | -4.4986622459 | -1.2652859459 | -1.9291293268 |
| O | -5.2887747729 | -3.1708273585 | 0.1199023283  |
| O | -7.6784747201 | -2.4999378415 | -0.6425443502 |
| C | -4.2559651208 | 2.1546120244  | -1.2950785901 |
| C | -8.028880309  | 0.9386178252  | -0.034363244  |

|   |               |               |               |
|---|---------------|---------------|---------------|
| O | -5.4456400136 | -2.2153455156 | -2.4121887459 |
| O | -4.7400696649 | 2.7666375941  | -0.1246809243 |
| N | -7.5908989829 | 1.5948971689  | 1.1753235228  |
| O | -8.5610518228 | 0.1311487258  | 2.6084999162  |
| C | -7.9189714327 | 1.1548527201  | 2.4191159004  |
| C | -7.4507623777 | 2.027473923   | 3.5638140112  |
| H | -3.8486598673 | -0.5414691879 | -0.005476221  |
| H | -5.3473408105 | -1.6069026993 | 1.453784964   |
| H | -7.6446821855 | -1.4371301674 | 1.0622107812  |
| H | -7.4074302114 | -0.3197499684 | -1.6240245849 |
| H | -6.1179798716 | 1.5817598563  | -2.190018261  |
| H | -5.2748424201 | -0.1511879473 | -3.5963511062 |
| H | -3.6649039416 | 0.3753746763  | -3.1129732847 |
| H | -3.4930359695 | -1.693241114  | -2.0156103447 |
| H | -6.1665354376 | -3.5938779682 | 0.0623416619  |
| H | -7.2642700429 | -2.4332683862 | -1.5234564542 |
| H | -4.1314204839 | 2.9244196203  | -2.0620375264 |
| H | -3.2658701887 | 1.6995504618  | -1.1228862241 |
| H | -8.9974708046 | 0.4698173841  | 0.1592780604  |
| H | -8.1821790432 | 1.7163615809  | -0.7890826205 |
| H | -5.2904348625 | -2.9874078853 | -1.8373237267 |
| H | -5.0776251547 | 1.9956820208  | 0.3740764872  |
| H | -7.0440873138 | 2.4351014957  | 1.0738415038  |
| H | -6.8036589693 | 2.852518513   | 3.2565467508  |
| H | -8.3275054989 | 2.4369666973  | 4.0723039418  |
| H | -6.9194967499 | 1.4039371174  | 4.2858126588  |

calc\_2d conf\_26

|   |               |               |               |
|---|---------------|---------------|---------------|
| C | -5.4670990404 | -2.3552447145 | -0.3476703062 |
| C | -6.6541608154 | -1.6909972695 | 0.407888456   |
| C | -6.3289311642 | -0.1880031402 | 0.4211473206  |
| N | -5.0404719028 | -0.0372227007 | -0.2757449615 |
| C | -4.8248009096 | -1.2070316963 | -1.1326923203 |
| C | -4.9664145476 | 1.1396811659  | -1.154367374  |
| C | -5.4565829211 | 0.6741710081  | -2.5422671295 |
| C | -5.430978266  | -0.8610362417 | -2.5145705697 |
| O | -5.9067029232 | -3.4320449117 | -1.1529498876 |
| O | -7.8785776012 | -2.0040443165 | -0.2229651183 |
| C | -3.5230050715 | 1.6438418512  | -1.156868998  |
| C | -6.2269701177 | 0.4361968275  | 1.8146538267  |
| O | -6.76364718   | -1.3469370148 | -2.6771674648 |
| O | -3.0616529005 | 1.8123433771  | 0.1568422303  |
| N | -7.5068419041 | 0.5702382974  | 2.4720827319  |
| O | -8.0722864516 | 2.4081848239  | 1.2833010816  |
| C | -8.3676597573 | 1.5653121275  | 2.1173213106  |
| C | -9.7073586999 | 1.5605115189  | 2.8200668343  |
| H | -3.749211783  | -1.3727461096 | -1.2626832568 |
| H | -4.7369185372 | -2.7280810719 | 0.3801539145  |
| H | -6.7435935385 | -2.1005785381 | 1.4181871623  |
| H | -7.1360256121 | 0.3361668576  | -0.1090424453 |
| H | -5.59928096   | 1.9254179685  | -0.7309431901 |
| H | -6.4831965182 | 0.9935909134  | -2.7374235128 |
| H | -4.8334276776 | 1.0772626697  | -3.3464035111 |
| H | -4.8119772014 | -1.2744709368 | -3.3189628058 |
| H | -6.8412359952 | -3.5524040637 | -0.8968122718 |
| H | -7.837275873  | -1.5660055604 | -1.0980240542 |
| H | -3.4652676722 | 2.6126808438  | -1.662123815  |
| H | -2.8846852832 | 0.9425436874  | -1.7232715804 |

|   |                |               |               |
|---|----------------|---------------|---------------|
| H | -5.7884046268  | 1.4328668953  | 1.71851444    |
| H | -5.5618347471  | -0.1604300129 | 2.4465163213  |
| H | -6.6609112647  | -2.3143557691 | -2.6394000442 |
| H | -3.3960661317  | 1.0221566215  | 0.6161361304  |
| H | -7.823829996   | -0.1571112893 | 3.0912720904  |
| H | -9.8998366208  | 2.5620671573  | 3.2095496591  |
| H | -10.4891442086 | 1.3386446201  | 2.0888023185  |
| H | -9.7747335787  | 0.8388661257  | 3.6379187885  |

calc\_2d conf\_27

|   |                |               |               |
|---|----------------|---------------|---------------|
| C | -5.946048462   | -2.4270695024 | -0.7774102027 |
| C | -6.4896020628  | -1.7497059987 | 0.5026016114  |
| C | -6.3456816641  | -0.2506971487 | 0.2096475535  |
| N | -5.0177111382  | -0.2240740314 | -0.4077111776 |
| C | -4.952992104   | -1.3780895826 | -1.3276847797 |
| C | -4.6312810713  | 0.9835766316  | -1.1603468315 |
| C | -4.4237847907  | 0.5310649903  | -2.6220811666 |
| C | -5.1868147257  | -0.7831527885 | -2.7237099984 |
| O | -7.0208267445  | -2.7780621041 | -1.6269150958 |
| O | -7.7896947104  | -2.1753115744 | 0.8079994336  |
| C | -3.3592487061  | 1.5791923681  | -0.5599470606 |
| C | -6.4635620145  | 0.6106922692  | 1.4600755473  |
| O | -6.585895677   | -0.5268215338 | -2.8880738913 |
| O | -3.4909895618  | 1.8065748407  | 0.817014022   |
| N | -7.8043121137  | 0.52018972    | 1.9881739727  |
| O | -8.0638378527  | 2.7527575683  | 2.3181313734  |
| C | -8.5171013421  | 1.6187964259  | 2.3544972443  |
| C | -9.9275278685  | 1.3392026868  | 2.8332579921  |
| H | -3.9361377575  | -1.7894145045 | -1.3337294785 |
| H | -5.4393178883  | -3.3651491899 | -0.5407359194 |
| H | -5.8393390302  | -1.9934027524 | 1.3514597224  |
| H | -7.1362248738  | 0.0537529252  | -0.496549826  |
| H | -5.4364786047  | 1.7232790985  | -1.0880785902 |
| H | -4.773405586   | 1.2688461574  | -3.3502562391 |
| H | -3.3595985385  | 0.3549604653  | -2.8208657491 |
| H | -4.8269396491  | -1.4418768736 | -3.5230305435 |
| H | -7.1956717322  | -2.0127656064 | -2.2076900639 |
| H | -8.1393491545  | -2.5002522052 | -0.0436948712 |
| H | -3.1322055483  | 2.5426334618  | -1.0268730641 |
| H | -2.5160999737  | 0.8999318932  | -0.7734653976 |
| H | -6.2617525057  | 1.665745377   | 1.2610278041  |
| H | -5.7272801787  | 0.2703308089  | 2.2038105511  |
| H | -6.730361389   | -0.1489038801 | -3.7648222174 |
| H | -3.7724142313  | 0.9524278164  | 1.1796579341  |
| H | -8.2492843325  | -0.3871639837 | 1.9541603815  |
| H | -10.0088639025 | 1.6433031925  | 3.8799579352  |
| H | -10.6211426649 | 1.9592868676  | 2.2609630131  |
| H | -10.2252198485 | 0.2913676956  | 2.7462360727  |

calc\_2d conf\_28

|   |               |               |               |
|---|---------------|---------------|---------------|
| C | -5.8290899899 | -2.4473049411 | -0.5654778865 |
| C | -6.449089333  | -1.6916801757 | 0.6232998443  |
| C | -6.417606393  | -0.2291248607 | 0.1599292783  |
| N | -5.0875052059 | -0.154878729  | -0.4305522837 |
| C | -4.8473106599 | -1.4234795848 | -1.1601909889 |
| C | -4.8105760657 | 0.9726771055  | -1.3479771349 |
| C | -4.240430644  | 0.3103102609  | -2.6119596301 |

|   |                |               |               |
|---|----------------|---------------|---------------|
| C | -4.9352145681  | -1.0407971079 | -2.6480280439 |
| O | -6.9103741143  | -2.8111298627 | -1.4426150581 |
| O | -7.7064359607  | -2.1887796973 | 0.9987244477  |
| C | -3.8212067552  | 1.9303544298  | -0.6824996757 |
| C | -6.6194883067  | 0.7647567138  | 1.2956367604  |
| O | -6.2536976457  | -0.8046239919 | -3.087935375  |
| O | -2.7292175645  | 1.2154885159  | -0.1554708737 |
| N | -7.9345792336  | 0.6173822202  | 1.8732309782  |
| O | -8.3254683755  | 2.8442340188  | 2.0678068743  |
| C | -8.7018364303  | 1.6900252576  | 2.2049784886  |
| C | -10.0677632213 | 1.3571836359  | 2.7693443588  |
| H | -3.8198448621  | -1.7611027414 | -0.9707238852 |
| H | -5.3228898041  | -3.3610703969 | -0.2450003846 |
| H | -5.7887406899  | -1.7903411353 | 1.4914880648  |
| H | -7.2096459564  | -0.0746817089 | -0.5940751666 |
| H | -5.7435030908  | 1.4978131656  | -1.5889256624 |
| H | -4.446983423   | 0.8876537652  | -3.5154985918 |
| H | -3.1579764925  | 0.1866261946  | -2.5049729188 |
| H | -4.4194689132  | -1.7724322876 | -3.288801558  |
| H | -6.8009287583  | -3.7328389772 | -1.700767764  |
| H | -8.1466031862  | -2.4187422365 | 0.1639835584  |
| H | -4.3308380605  | 2.511652812   | 0.100813415   |
| H | -3.4266616963  | 2.640836673   | -1.4153285058 |
| H | -6.5423050717  | 1.79707593    | 0.9456638292  |
| H | -5.8303440168  | 0.613166764   | 2.0461642732  |
| H | -6.7776641373  | -1.5723309754 | -2.8112113985 |
| H | -3.1547993187  | 0.4976680779  | 0.3440442631  |
| H | -8.2976679141  | -0.3210489519 | 1.9643187114  |
| H | -10.2898484665 | 0.2873288962  | 2.7894540692  |
| H | -10.1325589216 | 1.7509884696  | 3.7867238696  |
| H | -10.8268367526 | 1.8701654558  | 2.1744077018  |

calc\_2d conf\_29

|   |               |               |               |
|---|---------------|---------------|---------------|
| C | -5.7092967461 | -2.364273284  | 0.0974676663  |
| C | -6.9974271933 | -1.5874053243 | 0.4601523402  |
| C | -6.9591771908 | -0.3967064428 | -0.505940788  |
| N | -5.5501817011 | -0.0144382337 | -0.4582319425 |
| C | -4.7284093534 | -1.234995659  | -0.2691715585 |
| C | -4.9906501182 | 0.8036318265  | -1.5399222551 |
| C | -3.6018207263 | 0.1898519669  | -1.7672944089 |
| C | -3.8427175296 | -1.2953740059 | -1.5159401737 |
| O | -6.0246294703 | -3.2888568537 | -0.9257691095 |
| O | -8.1364029181 | -2.3806379288 | 0.3442671344  |
| C | -4.9503586139 | 2.2703341698  | -1.0801191307 |
| C | -7.9288051495 | 0.7329585369  | -0.1654704849 |
| O | -4.5960587352 | -1.847434057  | -2.5989937106 |
| O | -4.5917764165 | 2.3262121769  | 0.2833367049  |
| N | -7.5778327632 | 1.4653842526  | 1.0272199755  |
| O | -9.5794902581 | 1.1723684152  | 2.0687193867  |
| C | -8.463975876  | 1.6647699565  | 2.0466466055  |
| C | -7.9544645868 | 2.5424834056  | 3.1721066022  |
| H | -4.0485059592 | -1.0860235421 | 0.5800253065  |
| H | -5.3398220146 | -2.9451637544 | 0.9476039218  |
| H | -6.941228036  | -1.2114096353 | 1.487503999   |
| H | -7.2329939878 | -0.7711769581 | -1.5089156582 |
| H | -5.5921855369 | 0.7101973078  | -2.454513199  |
| H | -3.2096514887 | 0.3935767349  | -2.7680395956 |
| H | -2.8917396023 | 0.5890891315  | -1.0342563823 |

|   |               |               |               |
|---|---------------|---------------|---------------|
| H | -2.9284626486 | -1.876459856  | -1.3495793961 |
| H | -5.6587527392 | -2.9545543533 | -1.7636700931 |
| H | -7.9183855628 | -3.0061046619 | -0.3698439703 |
| H | -5.9315164388 | 2.7393041552  | -1.2436870796 |
| H | -4.2166637924 | 2.8389080338  | -1.6616674466 |
| H | -8.9177517356 | 0.300415783   | 0.0058433367  |
| H | -8.0131580159 | 1.419946041   | -1.0182490652 |
| H | -4.0119210792 | -1.9666645233 | -3.3578786225 |
| H | -4.8591587982 | 1.4367723268  | 0.6041218523  |
| H | -6.7183175424 | 1.9961439154  | 1.0230109473  |
| H | -6.9343261664 | 2.9055925394  | 3.0247015896  |
| H | -8.6255251067 | 3.3980184988  | 3.2803554283  |
| H | -8.0004584022 | 1.9757198989  | 4.1050712737  |

calc\_2d conf\_30

|   |                |               |               |
|---|----------------|---------------|---------------|
| C | -6.0653929182  | -1.989323005  | -0.0264388785 |
| C | -6.9726287785  | -0.9710961214 | 0.6687852872  |
| C | -6.6579697913  | 0.3419950455  | -0.0966832186 |
| N | -5.291573431   | 0.1889092553  | -0.6155303732 |
| C | -4.8010318258  | -1.1550235505 | -0.2462355377 |
| C | -5.0981743305  | 0.3680471757  | -2.0576031939 |
| C | -3.7720538542  | -0.3522292793 | -2.2865329511 |
| C | -3.8164084361  | -1.570668788  | -1.3585994478 |
| O | -6.7513462959  | -2.3084924624 | -1.222071305  |
| O | -8.327186271   | -1.3348672132 | 0.6314285752  |
| C | -5.0443814379  | 1.8618195468  | -2.372355913  |
| C | -6.7792413922  | 1.5851737898  | 0.7885714375  |
| O | -4.298935407   | -2.7515217197 | -2.003008561  |
| O | -4.1349693444  | 2.5148470333  | -1.5239230233 |
| N | -8.0624841744  | 1.6771024981  | 1.4470353989  |
| O | -7.2897716971  | 1.0217374049  | 3.4828552556  |
| C | -8.2282991899  | 1.2793020973  | 2.7446857014  |
| C | -9.6690068409  | 1.1646869591  | 3.1899057803  |
| H | -4.272594265   | -1.1007753099 | 0.7143375629  |
| H | -5.8831031683  | -2.8851027491 | 0.5809784874  |
| H | -6.6956820856  | -0.8627579967 | 1.7217491348  |
| H | -7.368709043   | 0.4113562263  | -0.9331921242 |
| H | -5.9040808089  | -0.109171252  | -2.638069577  |
| H | -3.6145931941  | -0.6350643815 | -3.3320247705 |
| H | -2.958383937   | 0.3160350132  | -1.9883536869 |
| H | -2.8293106744  | -1.7919446536 | -0.9372871933 |
| H | -6.106444014   | -2.7587683925 | -1.793371722  |
| H | -8.4423307886  | -1.7709856127 | -0.2289518655 |
| H | -6.0570037841  | 2.2875814147  | -2.2787060193 |
| H | -4.7211748138  | 2.0233757365  | -3.4057814385 |
| H | -6.5933767738  | 2.491850314   | 0.20130516    |
| H | -6.0297535172  | 1.5411540375  | 1.5816202779  |
| H | -3.6923789878  | -2.9732755352 | -2.7200167429 |
| H | -4.2436914249  | 2.0560742559  | -0.6707454099 |
| H | -8.8855214469  | 1.6908780057  | 0.8641296099  |
| H | -9.7128738568  | 1.2514717802  | 4.2751469688  |
| H | -10.3118438482 | 1.9231159449  | 2.7343716069  |
| H | -10.0452941511 | 0.177554488   | 2.9025767083  |

calc\_2d conf\_31

|   |               |               |               |
|---|---------------|---------------|---------------|
| C | -6.6496554516 | -2.0651289004 | -1.1387503033 |
| C | -7.4045908078 | -1.4484756313 | 0.0344853538  |

|   |               |               |               |
|---|---------------|---------------|---------------|
| C | -6.5290939206 | -0.2197915711 | 0.3852711161  |
| N | -5.1646859251 | -0.6203762902 | 0.0349970174  |
| C | -5.2069117581 | -1.9220916808 | -0.6677677651 |
| C | -4.4119225881 | 0.3211096624  | -0.794926763  |
| C | -3.3460311234 | -0.5733378348 | -1.4177114577 |
| C | -4.073599488  | -1.8968855616 | -1.7277611331 |
| O | -6.8971230505 | -1.248075193  | -2.2718592023 |
| O | -8.7035475222 | -1.1372938534 | -0.3835733643 |
| C | -3.8458370317 | 1.4669071958  | 0.0348441378  |
| C | -6.6482433012 | 0.2425131935  | 1.8562908858  |
| O | -4.4970040811 | -2.0104303141 | -3.0614500808 |
| O | -3.1238416235 | 2.3989567559  | -0.7395736733 |
| N | -7.3997111569 | 1.4704779538  | 2.0460715019  |
| O | -9.4235117629 | 0.5481407919  | 1.6377299627  |
| C | -8.742544923  | 1.5302029383  | 1.936263709   |
| C | -9.3853278432 | 2.8669647993  | 2.2159559061  |
| H | -5.0222181371 | -2.7301436576 | 0.0535086878  |
| H | -6.939759007  | -3.1041625436 | -1.3376673946 |
| H | -7.4124661054 | -2.1534060884 | 0.8808654277  |
| H | -6.8576350868 | 0.6091479609  | -0.2596727077 |
| H | -5.0448740737 | 0.7509144814  | -1.5909384014 |
| H | -2.9028483834 | -0.1661272063 | -2.3293119587 |
| H | -2.5490847549 | -0.7526504131 | -0.6838078142 |
| H | -3.3955143888 | -2.7401534961 | -1.5709379424 |
| H | -7.8193236995 | -0.9505061785 | -2.1734669776 |
| H | -9.1055469096 | -0.5707668938 | 0.3090296332  |
| H | -3.2378107737 | 1.0439525528  | 0.8507132961  |
| H | -4.6585823752 | 2.040351837   | 0.4933866908  |
| H | -5.6442574452 | 0.4098417838  | 2.2480346488  |
| H | -7.1124099381 | -0.5385741298 | 2.4677367992  |
| H | -5.3416926445 | -1.5391667008 | -3.1516780303 |
| H | -2.366416398  | 1.9354025462  | -1.1183352855 |
| H | -6.8955452293 | 2.3136299587  | 2.2669201887  |
| H | -8.6730285202 | 3.6554025351  | 2.469090807   |
| H | -9.9598239986 | 3.1720178523  | 1.3383491145  |
| H | -10.091978772 | 2.7476093397  | 3.0406453709  |

calc\_2d conf\_32

|   |               |               |               |
|---|---------------|---------------|---------------|
| C | -5.9930970126 | -2.3858075241 | -0.4821548234 |
| C | -6.7149433199 | -1.7055423443 | 0.6775784644  |
| C | -6.3274588926 | -0.2210942723 | 0.4966745102  |
| N | -5.0310326472 | -0.2230510195 | -0.1822211477 |
| C | -4.6685099202 | -1.6260024036 | -0.4791761666 |
| C | -4.9337077945 | 0.5378041604  | -1.4366712599 |
| C | -3.7144381142 | -0.0981554509 | -2.0927689082 |
| C | -3.832181599  | -1.6027694715 | -1.7850325355 |
| O | -6.732437513  | -2.1113678676 | -1.658903729  |
| O | -8.0975520079 | -1.9340276071 | 0.5788947554  |
| C | -4.7798645138 | 2.0373696545  | -1.2221342789 |
| C | -6.3231371025 | 0.5483739545  | 1.8381599181  |
| O | -4.3667771904 | -2.3631683022 | -2.8393074767 |
| O | -5.980243588  | 2.7094056944  | -0.8971398889 |
| N | -7.1620460828 | 1.7394559595  | 1.8112054225  |
| O | -9.0584111643 | 0.5238005023  | 1.6006829529  |
| C | -8.5169641718 | 1.6143329131  | 1.7563521034  |
| C | -9.3190622936 | 2.8870170817  | 1.8544071466  |
| H | -4.0679738451 | -2.0306968162 | 0.347559487   |
| H | -5.8700111788 | -3.4667569799 | -0.3409332732 |

|   |                |               |               |
|---|----------------|---------------|---------------|
| H | -6.3191410644  | -2.087696799  | 1.6319188479  |
| H | -7.0862117055  | 0.2281692545  | -0.1578659456 |
| H | -5.8256788545  | 0.378477809   | -2.0658222421 |
| H | -3.6641878341  | 0.0720703303  | -3.1702663364 |
| H | -2.8041824464  | 0.3079935026  | -1.6345373847 |
| H | -2.8422597272  | -2.0298002425 | -1.6051229534 |
| H | -7.66424508    | -2.1023873242 | -1.3728698923 |
| H | -8.5529034294  | -1.1649684535 | 0.9750776001  |
| H | -4.4376627077  | 2.4951064855  | -2.1550624483 |
| H | -3.998800943   | 2.2033784856  | -0.4631093334 |
| H | -5.3013536833  | 0.8619256357  | 2.0558338688  |
| H | -6.6636309932  | -0.099713551  | 2.6541856388  |
| H | -5.3290360834  | -2.23208181   | -2.8452425519 |
| H | -6.3391232294  | 2.3290783573  | -0.0834055048 |
| H | -6.7795320926  | 2.6102183044  | 2.1474325933  |
| H | -8.7224929367  | 3.7623590422  | 2.1199375303  |
| H | -9.7983633804  | 3.0717473281  | 0.8894346526  |
| H | -10.1113438566 | 2.7480037838  | 2.5924125884  |

calc\_2d conf\_33

|   |               |               |               |
|---|---------------|---------------|---------------|
| C | -6.1419698968 | -2.4843683935 | -0.8050300283 |
| C | -7.5610627393 | -2.0075434327 | -0.4752176282 |
| C | -7.4277872035 | -0.4600611009 | -0.3527622728 |
| N | -6.0063226519 | -0.1770653516 | -0.2182986302 |
| C | -5.2752536335 | -1.4368713901 | -0.1037933321 |
| C | -5.345363169  | 0.7445466807  | -1.1476094752 |
| C | -4.1564738909 | -0.0383140533 | -1.7257860533 |
| C | -3.9048109849 | -1.1750901096 | -0.7340187706 |
| O | -6.031892793  | -2.4335303258 | -2.2164229396 |
| O | -8.5170982958 | -2.4335434497 | -1.4067079913 |
| C | -4.9160419847 | 2.0130068236  | -0.405157509  |
| C | -8.2339700343 | 0.0279504711  | 0.8561266354  |
| O | -3.440756347  | -2.3824857636 | -1.3372708365 |
| O | -4.1932804312 | 1.7206262293  | 0.761432806   |
| N | -8.1852509785 | 1.4552955415  | 1.0851012259  |
| O | -6.5127285612 | 1.3758179513  | 2.6174969975  |
| C | -7.3306132821 | 2.0239453219  | 1.9737672572  |
| C | -7.4509487013 | 3.5229288476  | 2.1412515525  |
| H | -5.1646123396 | -1.7303738455 | 0.9495450845  |
| H | -5.9494565141 | -3.5007621537 | -0.4413830294 |
| H | -7.85850031   | -2.4205556668 | 0.4963676602  |
| H | -7.8258891134 | -0.0017201826 | -1.2680787282 |
| H | -6.0357046302 | 1.0330214026  | -1.9537798175 |
| H | -4.4345887835 | -0.475023625  | -2.6880844522 |
| H | -3.2731476778 | 0.5904983856  | -1.8707217327 |
| H | -3.2034331802 | -0.8497095138 | 0.0410826988  |
| H | -5.1105951311 | -2.6764997462 | -2.4075585965 |
| H | -8.0401989999 | -2.4773825035 | -2.2516727635 |
| H | -5.8097270343 | 2.6171557378  | -0.1853850836 |
| H | -4.2669647787 | 2.6201490556  | -1.0465360434 |
| H | -7.835186367  | -0.4430111395 | 1.7581251746  |
| H | -9.2804958965 | -0.2768425983 | 0.7419994154  |
| H | -2.5448540429 | -2.2268797109 | -1.6606452832 |
| H | -4.8317575818 | 1.3145488566  | 1.3750607781  |
| H | -8.8266419956 | 2.0481476313  | 0.5839472854  |
| H | -8.1700074105 | 3.992390451   | 1.4649751375  |
| H | -7.7430390166 | 3.7364369561  | 3.1725947255  |
| H | -6.4655736174 | 3.9671677128  | 1.984046563   |



calc\_2d conf\_34

|   |                |               |               |
|---|----------------|---------------|---------------|
| C | -6.0426694448  | -2.308324148  | -0.413987464  |
| C | -6.7525319323  | -1.599886451  | 0.7353940151  |
| C | -6.3780440999  | -0.1161160794 | 0.4949865744  |
| N | -5.0592195483  | -0.1586637394 | -0.1395739029 |
| C | -4.7117317126  | -1.5661016645 | -0.440070402  |
| C | -4.904146007   | 0.6142984565  | -1.3714453074 |
| C | -3.7028572888  | -0.0492811699 | -2.0303903975 |
| C | -3.888232374   | -1.5532081234 | -1.7560271835 |
| O | -6.7924531908  | -2.0477679104 | -1.5905768711 |
| O | -8.1234871089  | -1.8721150548 | 0.6528863808  |
| C | -4.7177563731  | 2.0987149644  | -1.0899597749 |
| C | -6.3891552028  | 0.7526721346  | 1.7748055278  |
| O | -4.4633376906  | -2.2620949925 | -2.8251227738 |
| O | -4.4853318093  | 2.8496266973  | -2.2616189971 |
| N | -7.4879309666  | 1.6986546983  | 1.8551825434  |
| O | -9.0812283584  | 0.1398247184  | 2.2363970521  |
| C | -8.7591597484  | 1.3207147407  | 2.1006225221  |
| C | -9.7823716311  | 2.4242236915  | 2.2195075818  |
| H | -4.1010370341  | -1.9710818033 | 0.3785557097  |
| H | -5.9342819565  | -3.3879113567 | -0.2529366662 |
| H | -6.3325650876  | -1.9398442873 | 1.6952271367  |
| H | -7.121383639   | 0.2971018144  | -0.2035212462 |
| H | -5.7941833763  | 0.4920896785  | -2.0214817067 |
| H | -3.6242408871  | 0.1472954408  | -3.100300801  |
| H | -2.7875412293  | 0.3118672618  | -1.5471380992 |
| H | -2.9161944545  | -2.0263428765 | -1.5930114327 |
| H | -7.7223972045  | -2.047327898  | -1.3003318555 |
| H | -8.5834310314  | -1.2397132705 | 1.2448447369  |
| H | -3.837857221   | 2.2347857224  | -0.4545929949 |
| H | -5.5893258581  | 2.4910130843  | -0.5377339897 |
| H | -5.461726038   | 1.3252516857  | 1.8087349217  |
| H | -6.4175558951  | 0.119796189   | 2.6683622686  |
| H | -5.4255610817  | -2.1381305317 | -2.786732137  |
| H | -5.2290407068  | 2.6961959366  | -2.8584840575 |
| H | -7.2886989455  | 2.6785603235  | 1.7378998157  |
| H | -9.3715605596  | 3.4255610472  | 2.0720016236  |
| H | -10.5748182203 | 2.2506601762  | 1.4879763193  |
| H | -10.2389550855 | 2.3700028949  | 3.2106533307  |

calc\_2d conf\_35

|   |               |               |               |
|---|---------------|---------------|---------------|
| C | -6.0490635234 | -2.5035971429 | -0.8684991064 |
| C | -6.5454842935 | -1.8802201993 | 0.4547269652  |
| C | -6.3629038728 | -0.376065721  | 0.2192786056  |
| N | -5.0498919995 | -0.3476142272 | -0.4082739138 |
| C | -4.9648094192 | -1.5040854164 | -1.326025574  |
| C | -4.6659566686 | 0.8683024298  | -1.1334893273 |
| C | -4.1989126252 | 0.377614649   | -2.5163580885 |
| C | -5.0128416897 | -0.8915038217 | -2.729267961  |
| O | -7.1547807896 | -2.6831417992 | -1.7333662999 |
| O | -7.8553700778 | -2.2764122111 | 0.7615828745  |
| C | -3.5778435079 | 1.6420536116  | -0.3942754891 |
| C | -6.4373558471 | 0.449317999   | 1.495702524   |
| O | -6.3700243027 | -0.5506556932 | -3.0344569653 |
| O | -3.1256082694 | 2.7609289241  | -1.1307493541 |
| N | -7.7615214295 | 0.3643798629  | 2.0668603667  |

|   |                |               |               |
|---|----------------|---------------|---------------|
| O | -7.966031239   | 2.5931656711  | 2.4493732241  |
| C | -8.4445309918  | 1.467677445   | 2.4696239001  |
| C | -9.8531103062  | 1.2103737627  | 2.9642338197  |
| H | -3.978916471   | -1.9772402118 | -1.2302170644 |
| H | -5.627447327   | -3.4986446655 | -0.705510125  |
| H | -5.8930501616  | -2.1851373436 | 1.2811049844  |
| H | -7.1600220081  | -0.0276016874 | -0.4641554329 |
| H | -5.5467646771  | 1.5181882472  | -1.2591496086 |
| H | -4.3489059223  | 1.1202666718  | -3.3040397235 |
| H | -3.1295868214  | 0.13873893    | -2.4950060427 |
| H | -4.6062464702  | -1.5611211854 | -3.4964262036 |
| H | -7.1943895763  | -1.9125165689 | -2.3307129431 |
| H | -8.2493430517  | -2.4698309099 | -0.1104799523 |
| H | -2.7105753949  | 0.9897870866  | -0.2567907228 |
| H | -3.9296554558  | 1.9293541437  | 0.6058060334  |
| H | -6.245364841   | 1.5089446606  | 1.3076235417  |
| H | -5.6720731825  | 0.0930689792  | 2.19885016    |
| H | -6.4007664261  | -0.1606629915 | -3.9169569234 |
| H | -3.8176784961  | 3.433082101   | -1.0972288988 |
| H | -8.2284375808  | -0.5306858631 | 2.0039698662  |
| H | -10.1609507214 | 0.1640887607  | 2.8970724507  |
| H | -9.9237535267  | 1.5341677264  | 4.0055705334  |
| H | -10.5460310352 | 1.8262359969  | 2.3860558709  |

calc\_2d conf\_36

|   |               |               |               |
|---|---------------|---------------|---------------|
| C | -6.0873007394 | -2.2393437744 | -0.4301355422 |
| C | -6.8031149682 | -1.4909392464 | 0.6879494615  |
| C | -6.3842449203 | -0.0216068199 | 0.4251245755  |
| N | -5.0493263578 | -0.1125726972 | -0.1718280527 |
| C | -4.7360753743 | -1.5353504823 | -0.4360907567 |
| C | -4.8488262928 | 0.6300220483  | -1.4187014662 |
| C | -3.6661221911 | -0.0886637084 | -2.054870286  |
| C | -3.8830811415 | -1.578581561  | -1.7320341267 |
| O | -6.7968442354 | -1.9817460655 | -1.6324543377 |
| O | -8.1771210779 | -1.7380960257 | 0.5847432587  |
| C | -4.5925942526 | 2.1023275788  | -1.1514257379 |
| C | -6.3947922247 | 0.8752441544  | 1.6827964424  |
| O | -4.4413690546 | -2.3237268373 | -2.7849327684 |
| O | -4.3952372218 | 2.7396630963  | -2.3955629828 |
| N | -7.574534253  | 1.7118210637  | 1.8258526726  |
| O | -8.9653574903 | 0.0526414351  | 2.4807450561  |
| C | -8.7723459144 | 1.2433269268  | 2.2307694847  |
| C | -9.8789253952 | 2.2596655897  | 2.3809970409  |
| H | -4.1585734138 | -1.942018205  | 0.4055095692  |
| H | -6.0138996772 | -3.3180412303 | -0.2451510337 |
| H | -6.4101084304 | -1.8190465879 | 1.6626408504  |
| H | -7.0980431364 | 0.3980402291  | -0.2999227559 |
| H | -5.7315375472 | 0.5490025613  | -2.0763100983 |
| H | -3.5891320931 | 0.0752922584  | -3.1300540437 |
| H | -2.7389542931 | 0.2627422803  | -1.5862583782 |
| H | -2.9224411812 | -2.0592380414 | -1.5285503955 |
| H | -7.7359685235 | -1.9674670368 | -1.3790661319 |
| H | -8.6162403041 | -1.1990809781 | 1.2750322253  |
| H | -3.7124195506 | 2.1882696092  | -0.4957384838 |
| H | -5.4514217151 | 2.5428833612  | -0.6165502972 |
| H | -5.5307559299 | 1.5398098517  | 1.642301678   |
| H | -6.2956802519 | 0.2674690853  | 2.5879427262  |
| H | -5.3975121952 | -2.1553758617 | -2.7971560928 |

|   |                |              |               |
|---|----------------|--------------|---------------|
| H | -4.148027069   | 3.6562888268 | -2.2284009091 |
| H | -7.4944932442  | 2.6901260808 | 1.6015565198  |
| H | -9.5740685724  | 3.2838665264 | 2.1543790497  |
| H | -10.7062200879 | 1.9794327961 | 1.724680428   |
| H | -10.2512896786 | 2.2179597995 | 3.4071736382  |

calc\_2d conf\_37

|   |                |               |               |
|---|----------------|---------------|---------------|
| C | -6.2606958986  | -2.1180172632 | -0.347343491  |
| C | -7.067594402   | -1.2308180028 | 0.6063024784  |
| C | -6.4415380678  | 0.1735502605  | 0.4033857353  |
| N | -5.1164299513  | -0.0392222048 | -0.1850750419 |
| C | -4.8730223921  | -1.491030328  | -0.2530814057 |
| C | -4.8877799137  | 0.5191689578  | -1.5212813873 |
| C | -3.7184086559  | -0.3115939824 | -2.0388538994 |
| C | -3.9100507569  | -1.7244533703 | -1.4472490105 |
| O | -6.7986101278  | -1.9444994585 | -1.6458818582 |
| O | -8.4296964014  | -1.3116239735 | 0.2538257096  |
| C | -4.5922795153  | 2.0111760003  | -1.4502587622 |
| C | -6.2705813943  | 0.9722682556  | 1.7031813297  |
| O | -4.3512725837  | -2.6960728815 | -2.3624008816 |
| O | -4.2914277339  | 2.563662458   | -2.7142685925 |
| N | -7.4119572503  | 1.002149814   | 2.6122574116  |
| O | -9.0833820245  | 1.2268304331  | 1.0930174006  |
| C | -8.700757195   | 1.1998210035  | 2.2646837638  |
| C | -9.6808187224  | 1.3656185722  | 3.4029548522  |
| H | -4.4195102965  | -1.8363511734 | 0.6866842376  |
| H | -6.2744957534  | -3.1768455351 | -0.0598994486 |
| H | -6.919578151   | -1.5667497587 | 1.6437080122  |
| H | -7.0768492434  | 0.7373431165  | -0.2864873261 |
| H | -5.7694869109  | 0.3609915407  | -2.168972254  |
| H | -3.6644283347  | -0.3504798086 | -3.1277349466 |
| H | -2.7808828999  | 0.1225994392  | -1.6741400477 |
| H | -2.9524200861  | -2.1042757136 | -1.0831358048 |
| H | -7.751240046   | -1.7931059268 | -1.4957057862 |
| H | -8.8302214381  | -0.4339049777 | 0.4164180484  |
| H | -3.7089858389  | 2.1686866029  | -0.824821203  |
| H | -5.4322930703  | 2.5440291281  | -0.9749177125 |
| H | -5.972797716   | 1.996143022   | 1.4480480681  |
| H | -5.4404185947  | 0.5269561349  | 2.2573243559  |
| H | -5.2834914337  | -2.5067266675 | -2.5591553614 |
| H | -5.0662407628  | 2.4403469919  | -3.2772920247 |
| H | -7.1950801066  | 1.0258934782  | 3.5959073872  |
| H | -10.4429627498 | 0.5868147249  | 3.3248298084  |
| H | -9.2263020695  | 1.3220228383  | 4.395269666   |
| H | -10.1870115108 | 2.3266982536  | 3.2851579808  |

calc\_2d conf\_38

|   |               |               |               |
|---|---------------|---------------|---------------|
| C | -6.1321059088 | -2.5583991595 | -1.0243446451 |
| C | -7.3522645926 | -2.0785397613 | -0.2330274138 |
| C | -7.0694836792 | -0.5647090439 | -0.0209337768 |
| N | -5.6152569417 | -0.3946957532 | -0.1623945333 |
| C | -5.0196712378 | -1.7253839891 | -0.3795896047 |
| C | -5.1342539001 | 0.4724960669  | -1.23624833   |
| C | -3.6767042829 | 0.0358806751  | -1.353784672  |
| C | -3.7210103046 | -1.4857792457 | -1.1761908196 |
| O | -6.4099282237 | -2.1945666889 | -2.3628133869 |
| O | -8.5663130549 | -2.3573564897 | -0.8688452135 |

|   |               |               |               |
|---|---------------|---------------|---------------|
| C | -5.3116341873 | 1.9525792251  | -0.947639901  |
| C | -7.5510731578 | -0.0897229404 | 1.3472526885  |
| O | -3.7882713945 | -2.1971458805 | -2.4142058889 |
| O | -4.646423762  | 2.2933977192  | 0.2605254312  |
| N | -7.1730593185 | 1.2769371776  | 1.6056031852  |
| O | -9.2227525842 | 1.9684282746  | 2.3118453904  |
| C | -8.0456593914 | 2.2027359504  | 2.0801901948  |
| C | -7.4537490345 | 3.5799739002  | 2.3138862466  |
| H | -4.783229209  | -2.1867155142 | 0.5890075384  |
| H | -5.9643067761 | -3.6395075595 | -0.9330684236 |
| H | -7.3816495134 | -2.5840773025 | 0.7393890019  |
| H | -7.5931573135 | -0.0024537004 | -0.8046708349 |
| H | -5.662006114  | 0.2710861319  | -2.1848927241 |
| H | -3.2149896706 | 0.3283654022  | -2.3025728499 |
| H | -3.1095165152 | 0.4908930138  | -0.5373911908 |
| H | -2.8505679768 | -1.8503265425 | -0.6193528661 |
| H | -5.5705857568 | -2.2875460818 | -2.8439789273 |
| H | -8.3911748133 | -2.2214260571 | -1.8138858555 |
| H | -6.3821841114 | 2.187972105   | -0.8767777554 |
| H | -4.8992022079 | 2.51801539    | -1.7949897116 |
| H | -7.1269512761 | -0.7475949575 | 2.1191866603  |
| H | -8.6393705813 | -0.1514214006 | 1.4170702889  |
| H | -2.9830504382 | -2.0110251447 | -2.9123927228 |
| H | -4.597481045  | 3.2556109401  | 0.3088272069  |
| H | -6.2016575009 | 1.5238478576  | 1.4467061244  |
| H | -6.4144713756 | 3.6674175548  | 1.988141775   |
| H | -8.0638614091 | 4.3185675402  | 1.7888795138  |
| H | -7.5099714391 | 3.8121882883  | 3.3804808015  |

calc\_2d conf\_39

|   |               |               |               |
|---|---------------|---------------|---------------|
| C | -6.1715936243 | -2.4790635999 | -1.0653475296 |
| C | -7.4265365183 | -1.9164285263 | -0.3983594332 |
| C | -7.0613850794 | -0.4237629769 | -0.157070357  |
| N | -5.5918928968 | -0.3516081109 | -0.1562042502 |
| C | -5.0773136378 | -1.7243905956 | -0.3075018472 |
| C | -4.942201478  | 0.4772872748  | -1.1679040801 |
| C | -3.5243656338 | -0.0941035817 | -1.1971783019 |
| C | -3.6945075785 | -1.5972894354 | -0.9863405399 |
| O | -6.2749407064 | -2.0967421723 | -2.4238700092 |
| O | -8.5894875454 | -2.1102499692 | -1.1517098274 |
| C | -4.929073953  | 1.9617665659  | -0.8356238229 |
| C | -7.6945743345 | 0.0654338086  | 1.139583642   |
| O | -3.6134863919 | -2.2530991175 | -2.2595213761 |
| O | -6.1909908278 | 2.6009850147  | -0.9714566409 |
| N | -7.4975183225 | 1.4783185126  | 1.3507543857  |
| O | -7.8040835521 | 1.3685582876  | 3.5939350984  |
| C | -7.5515412515 | 2.0221618491  | 2.5906107189  |
| C | -7.2844424493 | 3.5140175608  | 2.6519749545  |
| H | -4.9749018165 | -2.1899414544 | 0.6830288382  |
| H | -6.0961185779 | -3.5716453487 | -0.9630429443 |
| H | -7.5878825053 | -2.4149242638 | 0.5644607831  |
| H | -7.4598835905 | 0.1548604681  | -1.0006633994 |
| H | -5.412978464  | 0.3453640816  | -2.1610522428 |
| H | -2.9883407632 | 0.1123558079  | -2.126012226  |
| H | -2.9482258646 | 0.3257887928  | -0.3658805204 |
| H | -2.9019940955 | -1.9979898602 | -0.3469385234 |
| H | -5.3765398235 | -2.1725824872 | -2.7927618525 |
| H | -8.3187585929 | -1.9729433123 | -2.0734537052 |

|   |               |               |               |
|---|---------------|---------------|---------------|
| H | -4.1846373964 | 2.4697933718  | -1.4653499875 |
| H | -4.6417967727 | 2.0898138337  | 0.2104384523  |
| H | -7.2675147341 | -0.472080051  | 1.9923668562  |
| H | -8.7656531041 | -0.1798059141 | 1.1109887304  |
| H | -3.4652038276 | -3.1941726293 | -2.0998506579 |
| H | -6.4842501473 | 2.500299073   | -1.8863501517 |
| H | -7.2338197321 | 2.0453820498  | 0.5530103464  |
| H | -6.9853254257 | 3.9448967959  | 1.6932083602  |
| H | -8.187760024  | 4.0205721381  | 3.0022264706  |
| H | -6.5024789609 | 3.7001681201  | 3.3918565898  |

calc\_2d conf\_40

|   |                |               |               |
|---|----------------|---------------|---------------|
| C | -6.2305595872  | -2.3930119586 | -0.7951928462 |
| C | -6.9784188983  | -1.6964611378 | 0.3427911625  |
| C | -6.514845576   | -0.2288830483 | 0.1970558521  |
| N | -5.1230976604  | -0.3369663688 | -0.2290365892 |
| C | -4.855601012   | -1.7290557444 | -0.6610617901 |
| C | -4.6516720516  | 0.5674682908  | -1.2708882147 |
| C | -3.4382257301  | -0.1805887518 | -1.8153555391 |
| C | -3.9075298096  | -1.6325803906 | -1.8706030523 |
| O | -6.9630257927  | -2.047043667  | -1.9507749347 |
| O | -8.3734587454  | -1.8582211897 | 0.2729361164  |
| C | -4.3061164273  | 1.9452507747  | -0.7349472747 |
| C | -6.6872266952  | 0.5598419386  | 1.4913723948  |
| O | -4.6156828888  | -1.9220390422 | -3.0773326556 |
| O | -3.7407587985  | 2.6790765799  | -1.8040923827 |
| N | -8.0866905782  | 0.6285540578  | 1.8489861843  |
| O | -7.9755843351  | 2.7320099684  | 2.6898165441  |
| C | -8.631302991   | 1.7377959117  | 2.411445097   |
| C | -10.1207057339 | 1.6640540464  | 2.6802095318  |
| H | -4.3260768508  | -2.2614182199 | 0.1420004344  |
| H | -6.1792977954  | -3.4830921833 | -0.6702901326 |
| H | -6.6598029998  | -2.0946501782 | 1.3127468357  |
| H | -7.1324644434  | 0.2367070032  | -0.5883162219 |
| H | -5.3995519328  | 0.6873960783  | -2.0749364352 |
| H | -3.0938542022  | 0.2010551938  | -2.7803162115 |
| H | -2.6083533722  | -0.0906246483 | -1.105594425  |
| H | -3.0787595978  | -2.3441112125 | -1.7779049199 |
| H | -6.336604684   | -2.0437769949 | -2.6951246607 |
| H | -8.5814726944  | -1.7776457557 | -0.6733473136 |
| H | -3.6044910918  | 1.8289409669  | 0.1047090312  |
| H | -5.2101057196  | 2.438470384   | -0.3518221596 |
| H | -6.3264854635  | 1.5861895165  | 1.3977683208  |
| H | -6.0934765081  | 0.0827818906  | 2.2835675733  |
| H | -4.1056964009  | -1.5804236051 | -3.8219554587 |
| H | -3.5886147849  | 3.5807485507  | -1.4983842109 |
| H | -8.6709508239  | -0.152816938  | 1.5824963575  |
| H | -10.5839813166 | 0.7304856315  | 2.3516119391  |
| H | -10.290021589  | 1.7849270971  | 3.7530610387  |
| H | -10.6094344175 | 2.5026571541  | 2.1787030152  |

calc\_2d conf\_41

|   |               |               |               |
|---|---------------|---------------|---------------|
| C | -6.3659501088 | -2.3802829183 | -0.8753400789 |
| C | -7.1058044039 | -1.8137675258 | 0.3392509818  |
| C | -6.5392564379 | -0.3812791714 | 0.4304703248  |
| N | -5.143328687  | -0.5211133601 | 0.0310479972  |
| C | -4.9537537019 | -1.8471456494 | -0.6024941612 |

|   |                |               |               |
|---|----------------|---------------|---------------|
| C | -4.5991918277  | 0.4957633734  | -0.8629538417 |
| C | -3.4132373749  | -0.2331464024 | -1.485261158  |
| C | -3.9556697192  | -1.6357320177 | -1.7569774769 |
| O | -7.0281095226  | -1.8051334942 | -1.9815351739 |
| O | -8.5038164636  | -1.8684998641 | 0.2250630968  |
| C | -4.2068108544  | 1.7787837629  | -0.1392033036 |
| C | -6.7202964983  | 0.2352203349  | 1.8181880316  |
| O | -4.6330440961  | -1.7172119731 | -3.0123588151 |
| O | -3.5603207242  | 2.686842644   | -1.0128969179 |
| N | -8.1013596328  | 0.5911768852  | 2.0603021813  |
| O | -7.7617420734  | 2.8092168177  | 1.6882848573  |
| C | -8.5259137056  | 1.8753330219  | 1.8892695025  |
| C | -10.0216559385 | 2.0832981667  | 1.9986306251  |
| H | -4.4929504098  | -2.5324093916 | 0.123160833   |
| H | -6.3950551993  | -3.4774566271 | -0.9220136027 |
| H | -6.8386247368  | -2.3778576645 | 1.24064767    |
| H | -7.0888057715  | 0.2421205396  | -0.2931791287 |
| H | -5.3254348015  | 0.7501917185  | -1.6597964348 |
| H | -3.022920885   | 0.2600160618  | -2.3795780535 |
| H | -2.598695922   | -0.2892757782 | -0.7543670319 |
| H | -3.168631172   | -2.3987233556 | -1.7389699927 |
| H | -6.3827376041  | -1.7606949894 | -2.7074458263 |
| H | -8.6837722919  | -1.6262029247 | -0.6984490575 |
| H | -3.4909326417  | 1.5340736271  | 0.6513153428  |
| H | -5.0824065693  | 2.2424307325  | 0.3332725307  |
| H | -6.1423919218  | 1.1536324662  | 1.9163502639  |
| H | -6.3722280708  | -0.4630078484 | 2.5881035938  |
| H | -4.0445746367  | -1.380961333  | -3.6992416753 |
| H | -4.2446215495  | 3.1315075827  | -1.5273667835 |
| H | -8.782229262   | -0.1502948456 | 1.9778916801  |
| H | -10.3846262353 | 2.5329337381  | 1.071155395   |
| H | -10.5812365508 | 1.1657726078  | 2.1953914478  |
| H | -10.2168619975 | 2.7968830539  | 2.8026321585  |

calc\_2d conf\_42

|   |               |               |               |
|---|---------------|---------------|---------------|
| C | -5.7661892523 | -2.4928316375 | -0.5006309051 |
| C | -6.9484409956 | -1.7615954592 | 0.1956337856  |
| C | -6.4248822054 | -0.3438777335 | 0.4812927101  |
| N | -5.0519846397 | -0.2961853168 | -0.0411083842 |
| C | -4.8801121914 | -1.3604763599 | -1.0311666777 |
| C | -4.7151062057 | 0.9575476219  | -0.7187774659 |
| C | -5.0755258829 | 0.7586992101  | -2.2097216773 |
| C | -5.2407732458 | -0.7530975858 | -2.4102534608 |
| O | -6.2264503471 | -3.3872049889 | -1.4961366192 |
| O | -8.0990154    | -1.7901906829 | -0.6229612066 |
| C | -3.2334448645 | 1.2792502867  | -0.5145331618 |
| C | -6.4129987964 | 0.0494884599  | 1.9609029828  |
| O | -6.5881749424 | -1.0242399837 | -2.8035347709 |
| O | -2.8293067607 | 2.4401479415  | -1.2091812408 |
| N | -7.7269671771 | 0.3453623113  | 2.4854164457  |
| O | -7.7187944508 | 2.4541921789  | 1.6659175168  |
| C | -8.3072831231 | 1.5552010995  | 2.2495773567  |
| C | -9.7236019409 | 1.7162154114  | 2.7566296306  |
| H | -3.8284284012 | -1.6694762761 | -1.0587608733 |
| H | -5.1960939444 | -3.0549103507 | 0.2482199104  |
| H | -7.2387211972 | -2.284930127  | 1.1115283411  |
| H | -7.0853536329 | 0.3659764898  | -0.0382584788 |
| H | -5.3027659088 | 1.7677229761  | -0.2693955146 |

|   |                |               |               |
|---|----------------|---------------|---------------|
| H | -6.0236171021  | 1.2387106749  | -2.4663439268 |
| H | -4.306700536   | 1.1914098544  | -2.8538281555 |
| H | -4.5723606029  | -1.1399974641 | -3.1877799127 |
| H | -7.1954300145  | -3.3946823609 | -1.3785958981 |
| H | -7.8630396046  | -1.2653947904 | -1.417034599  |
| H | -2.6123610688  | 0.4688604676  | -0.908569276  |
| H | -3.0289276547  | 1.3516886939  | 0.562743593   |
| H | -5.8043897625  | 0.9486709285  | 2.0761908607  |
| H | -5.952649737   | -0.7419294225 | 2.55984309    |
| H | -6.6100484415  | -1.9931805729 | -2.8939826219 |
| H | -3.308041435   | 3.1888118829  | -0.8308168415 |
| H | -8.2855523912  | -0.3987850202 | 2.8698932405  |
| H | -10.4024246215 | 1.7682892284  | 1.9009757431  |
| H | -10.0498137923 | 0.9073365775  | 3.4150901406  |
| H | -9.7972277294  | 2.665403838   | 3.2905163209  |

calc\_2d conf\_43

|   |               |               |               |
|---|---------------|---------------|---------------|
| C | -6.2612228921 | -2.4872152827 | -0.9576251495 |
| C | -7.6191601618 | -1.9235863284 | -0.521663556  |
| C | -7.339070302  | -0.4119886439 | -0.2862231215 |
| N | -5.8848590321 | -0.2658422977 | -0.1790919237 |
| C | -5.2957735296 | -1.6123616714 | -0.1651112307 |
| C | -5.2170259692 | 0.5162660925  | -1.2322191291 |
| C | -3.7850330186 | -0.0192368446 | -1.2185148761 |
| C | -3.8515500064 | -1.4748779863 | -0.7081241608 |
| O | -6.1097629239 | -2.2584059239 | -2.3665603929 |
| O | -8.6596711754 | -2.1821133807 | -1.4327534298 |
| C | -5.3021615816 | 2.0004012567  | -0.8894216089 |
| C | -8.096257706  | 0.0733189532  | 0.9529017161  |
| O | -3.5077411193 | -2.4584890648 | -1.6541389404 |
| O | -4.7766255194 | 2.2679900906  | 0.384882306   |
| N | -8.0307885625 | 1.4959317899  | 1.1825419774  |
| O | -6.565188272  | 1.361362788   | 2.9063397877  |
| C | -7.2581354683 | 2.0434452673  | 2.1655040002  |
| C | -7.2779194304 | 3.5518075732  | 2.2436579391  |
| H | -5.2924592223 | -2.0010667327 | 0.8616607813  |
| H | -6.1435958877 | -3.5527257577 | -0.737318914  |
| H | -7.9248182693 | -2.3974279061 | 0.4173088384  |
| H | -7.6990356489 | 0.1476862317  | -1.1624611913 |
| H | -5.6848143752 | 0.3476374573  | -2.2165864897 |
| H | -3.316265837  | 0.0146098579  | -2.204697818  |
| H | -3.1876850208 | 0.5919616451  | -0.5366231726 |
| H | -3.1390743654 | -1.6143548313 | 0.107362188   |
| H | -6.5825511766 | -2.970499293  | -2.8176543671 |
| H | -8.4051436171 | -1.7374181847 | -2.2538181198 |
| H | -6.3513701532 | 2.3316413116  | -0.9645883826 |
| H | -4.7249676677 | 2.5839763546  | -1.61400793   |
| H | -7.6713665287 | -0.3983990653 | 1.8422026905  |
| H | -9.1453544277 | -0.2346263621 | 0.8645174785  |
| H | -4.2111077782 | -2.441877027  | -2.3231642555 |
| H | -5.1050267036 | 1.5542574385  | 0.9608860898  |
| H | -8.5863210477 | 2.1073132839  | 0.6063902109  |
| H | -7.2355302497 | 3.8509075736  | 3.2915685013  |
| H | -6.374546682  | 3.9170515914  | 1.7467173145  |
| H | -8.1530186705 | 4.0049460271  | 1.7699263404  |

calc\_2d conf\_44

|   |               |               |               |
|---|---------------|---------------|---------------|
| C | -6.30723933   | -2.3558560508 | -0.8909111236 |
| C | -7.6360985904 | -1.5228979765 | -0.8383191228 |
| C | -7.2819377599 | -0.2714890761 | -0.0010299378 |
| N | -5.8299390047 | -0.1935521339 | 0.0588487908  |
| C | -5.358571211  | -1.5789708745 | 0.0528930973  |
| C | -5.1895845551 | 0.4583232154  | -1.1021033458 |
| C | -3.772754468  | -0.1163365903 | -1.0747161689 |
| C | -3.8730450656 | -1.4922212816 | -0.3650372567 |
| O | -5.8243521011 | -2.3966340667 | -2.2169283492 |
| O | -8.0676100625 | -1.2151618455 | -2.16008108   |
| C | -5.2481227893 | 1.9778022442  | -1.0343168548 |
| C | -7.9051771586 | -0.3655664779 | 1.4033275239  |
| O | -3.4075941756 | -2.591356985  | -1.0995142987 |
| O | -6.5373147534 | 2.496959681   | -1.2831417461 |
| N | -7.3523317675 | 0.5634346458  | 2.3666414851  |
| O | -7.8933463616 | 2.4255953408  | 1.2045954848  |
| C | -7.3367390836 | 1.8987433892  | 2.1673755543  |
| C | -6.6084069359 | 2.7200224178  | 3.2056569241  |
| H | -5.4590198154 | -2.0121098781 | 1.0569375511  |
| H | -6.4684377672 | -3.3812773052 | -0.5370238326 |
| H | -8.4407233239 | -2.108532295  | -0.3817632223 |
| H | -7.6722473481 | 0.6320280003  | -0.4695954429 |
| H | -5.6763126692 | 0.1599859612  | -2.0446244376 |
| H | -3.3583419102 | -0.2373614454 | -2.0779306559 |
| H | -3.1026696845 | 0.5494807753  | -0.5193706053 |
| H | -3.2574703196 | -1.4762446211 | 0.5378013186  |
| H | -6.5638041458 | -2.0709016392 | -2.7672617964 |
| H | -7.9131614973 | -0.2740691127 | -2.3181410943 |
| H | -4.5842595393 | 2.3812196611  | -1.8081857489 |
| H | -4.8564214884 | 2.3048463063  | -0.0603673593 |
| H | -7.7687172563 | -1.3668164744 | 1.8217938485  |
| H | -8.9834143071 | -0.1973322707 | 1.3140691674  |
| H | -4.0073008787 | -2.6811396537 | -1.8587090168 |
| H | -6.9982890909 | 2.6089692218  | -0.4324946058 |
| H | -6.7440081665 | 0.1904549764  | 3.0766361922  |
| H | -6.3028484412 | 2.1481950403  | 4.0848029543  |
| H | -5.7209036816 | 3.1645906296  | 2.7472670195  |
| H | -7.258483495  | 3.5391765478  | 3.5189201904  |

calc\_2d conf\_45

|   |               |               |               |
|---|---------------|---------------|---------------|
| C | -6.1122945284 | -2.3623711316 | -0.4481618525 |
| C | -7.4594993204 | -1.6423387851 | -0.7279505487 |
| C | -7.2776750161 | -0.2691404437 | -0.0784196306 |
| N | -5.8594615041 | 0.0622028818  | -0.2567155818 |
| C | -5.119917153  | -1.1999220964 | -0.1050959344 |
| C | -5.4827346387 | 0.699193547   | -1.539971592  |
| C | -4.4686781913 | -0.2426832195 | -2.197173639  |
| C | -3.9008948647 | -1.0138472627 | -1.0108358514 |
| O | -5.801454786  | -3.1482870109 | -1.5795092147 |
| O | -7.6271830441 | -1.4634704269 | -2.1129462195 |
| C | -4.9027622377 | 2.085930237   | -1.2574816089 |
| C | -7.6409293233 | -0.2725746024 | 1.407295839   |
| O | -3.3113192637 | -2.2744256072 | -1.3114858675 |
| O | -4.4791917755 | 2.7551163996  | -2.4259868919 |
| N | -7.2107752682 | 0.9557778113  | 2.0212413885  |
| O | -8.9963435744 | 1.1694711652  | 3.4013188363  |
| C | -7.9317890703 | 1.5948816884  | 2.9786751099  |
| C | -7.3243027738 | 2.8839560324  | 3.4938469723  |



|   |               |               |               |
|---|---------------|---------------|---------------|
| H | -4.798754889  | -1.3245128065 | 0.9343958141  |
| H | -6.2104197789 | -3.014315128  | 0.4287365584  |
| H | -8.3074766571 | -2.1991675223 | -0.3035270291 |
| H | -7.8909722547 | 0.4794250908  | -0.5873695916 |
| H | -6.36488183   | 0.8040961135  | -2.1806066269 |
| H | -4.9821606931 | -0.945253766  | -2.8589284766 |
| H | -3.7173474649 | 0.3064466888  | -2.7716193554 |
| H | -3.1648321401 | -0.3980313798 | -0.4776372439 |
| H | -4.8299062355 | -3.1550338288 | -1.6669750516 |
| H | -7.1311724876 | -2.2006735609 | -2.5136217751 |
| H | -4.0156901653 | 1.9933124144  | -0.6233495704 |
| H | -5.6425756111 | 2.6747054967  | -0.6941256039 |
| H | -7.1903349462 | -1.1385423007 | 1.9150932293  |
| H | -8.7216790141 | -0.3558617788 | 1.5411484297  |
| H | -2.6097102724 | -2.1330570891 | -1.9596296979 |
| H | -5.2615031265 | 2.932025063   | -2.9638130858 |
| H | -6.3322759287 | 1.3237248069  | 1.6858201822  |
| H | -7.1406797236 | 2.7820167953  | 4.5662800195  |
| H | -6.3904934323 | 3.1627878562  | 2.9990433407  |
| H | -8.0509270151 | 3.6894396589  | 3.3650418213  |

calc\_2d conf\_46

|   |               |               |               |
|---|---------------|---------------|---------------|
| C | -6.3115887871 | -2.2585162277 | -0.3125425798 |
| C | -7.5914965994 | -1.6370961682 | -0.9388834552 |
| C | -7.6133869123 | -0.2154617683 | -0.3636833091 |
| N | -6.2163719327 | 0.1782867088  | -0.2482312564 |
| C | -5.4841471122 | -1.0212290977 | 0.1753036804  |
| C | -5.5782100876 | 0.7560430573  | -1.4480713823 |
| C | -4.3847015905 | -0.152080269  | -1.765683711  |
| C | -4.0920267634 | -0.8186749773 | -0.4248438762 |
| O | -5.7102179959 | -3.0783067041 | -1.295492135  |
| O | -7.4536064385 | -1.5577843103 | -2.3364429244 |
| C | -5.1596709025 | 2.195561874   | -1.1460789044 |
| C | -8.3206009806 | -0.1767000481 | 1.0007640015  |
| O | -3.3966354458 | -2.0607376118 | -0.4944403058 |
| O | -4.5072095534 | 2.8228103735  | -2.231111158  |
| N | -8.1809818885 | 1.0839100189  | 1.6848902475  |
| O | -6.548489599  | 0.3588875092  | 3.0916711075  |
| C | -7.2068535144 | 1.2741524524  | 2.6219928404  |
| C | -7.006605301  | 2.7104063029  | 3.0563661372  |
| H | -5.4331646761 | -1.0473214013 | 1.2673950943  |
| H | -6.5780387303 | -2.8740523149 | 0.5553788058  |
| H | -8.4890924804 | -2.2159624734 | -0.674015049  |
| H | -8.1291330143 | 0.4592893042  | -1.0553828952 |
| H | -6.2794245597 | 0.7569112424  | -2.291221798  |
| H | -4.6810409357 | -0.92433264   | -2.4809725974 |
| H | -3.5416351635 | 0.4103503125  | -2.1773689862 |
| H | -3.5321970939 | -0.1354833651 | 0.2264038286  |
| H | -4.7457749343 | -3.0287462119 | -1.1544847156 |
| H | -6.8202671854 | -2.2670413407 | -2.5540785806 |
| H | -4.4479770252 | 2.2060122088  | -0.3154212018 |
| H | -6.0442583836 | 2.7628059217  | -0.8181838674 |
| H | -7.9051318181 | -0.929213374  | 1.6751208634  |
| H | -9.3825518572 | -0.4069192317 | 0.8617410557  |
| H | -2.5569082811 | -1.9114094375 | -0.9467060852 |
| H | -5.1345697385 | 2.8655572066  | -2.9640626144 |
| H | -8.5788882679 | 1.9017202583  | 1.2499787511  |
| H | -7.8794953831 | 3.3434574686  | 2.8754575583  |

|   |               |              |             |
|---|---------------|--------------|-------------|
| H | -6.7622322534 | 2.7253971294 | 4.118946608 |
| H | -6.1554168133 | 3.1295096237 | 2.510992809 |

calc\_2d conf\_47

|   |                |               |               |
|---|----------------|---------------|---------------|
| C | -6.1101356391  | -1.6428247685 | 0.2096249742  |
| C | -7.3173104531  | -0.7051504784 | -0.0476903158 |
| C | -6.7062139613  | 0.6975767841  | 0.0102605229  |
| N | -5.3581091023  | 0.5608750205  | -0.5379545662 |
| C | -4.8599922742  | -0.7452956394 | -0.083322348  |
| C | -5.2148014791  | 0.6581832386  | -2.0063177808 |
| C | -4.6219398562  | -0.6795084813 | -2.4613606542 |
| C | -3.9155029297  | -1.1792194189 | -1.2064827406 |
| O | -6.2706601147  | -2.7845085081 | -0.6108207618 |
| O | -7.8161827763  | -0.9092813895 | -1.3513118837 |
| C | -4.3132941489  | 1.8475834126  | -2.3413280691 |
| C | -6.6104385178  | 1.2797440023  | 1.4273867704  |
| O | -3.6766240185  | -2.5819187    | -1.1427469357 |
| O | -4.0884727172  | 1.9965043625  | -3.728887692  |
| N | -7.8900564608  | 1.4811720401  | 2.0675493111  |
| O | -7.7679345208  | -0.3762629076 | 3.3620787565  |
| C | -8.3762277199  | 0.6222814776  | 3.0061820659  |
| C | -9.7304620958  | 0.9791256196  | 3.5806954288  |
| H | -4.2989273599  | -0.6307554881 | 0.8504030641  |
| H | -6.0983829338  | -1.946323859  | 1.2622807765  |
| H | -8.1053840686  | -0.8626645439 | 0.6974406114  |
| H | -7.2933580486  | 1.378897612   | -0.6144179444 |
| H | -6.1943462426  | 0.8108116532  | -2.473886573  |
| H | -5.4241100164  | -1.3785318656 | -2.7127331488 |
| H | -3.9629410516  | -0.5608408    | -3.3262393255 |
| H | -2.9604551463  | -0.6532984268 | -1.0772289229 |
| H | -5.3772472028  | -3.0822830329 | -0.8629154589 |
| H | -7.5818750627  | -1.8338787627 | -1.5526564158 |
| H | -3.3278103578  | 1.7062979127  | -1.8881477702 |
| H | -4.7418897251  | 2.7577348174  | -1.8960558859 |
| H | -6.0705289143  | 2.2297236009  | 1.3726287576  |
| H | -6.0432638879  | 0.613267287   | 2.080770269   |
| H | -3.1674569134  | -2.8353572462 | -1.9228717811 |
| H | -4.9390544396  | 2.1891193298  | -4.1435630308 |
| H | -8.4522846431  | 2.2690954137  | 1.7900649054  |
| H | -10.1168846831 | 1.9438636722  | 3.2423520737  |
| H | -10.4446727415 | 0.1976098687  | 3.3091019574  |
| H | -9.6557677752  | 0.9864371912  | 4.6701197599  |
